# Supplementary material
Source: publisher figshare collection journal article supplement (https://plos.figshare.com/articles/dataset/_/1595090)
Supplement: Supplementary file 1 [file 1]

## Sheet: U.S. Police Shootings Data (Cle
ID	Timestamp	Date Searched	State	County	City	Agency Name	Victim Name	Victim's Age	Victim's Gender	Race	Hispanic or Latino Origin	Ethnicity	Shots Fired	Hit or Killed?	Armed	Weapon	Summary	Source Link	Name of Officer or Officers	Shootings	Was the Shooting Justified?	Receive Updates?	Name	Email Address	Twitter	Date of Incident	Results Page Number
NVClark	2014-08-20 14:26:35	2011-01-01	NV - Nevada	Clark	N. Las Vegas	North Las Vegas PD	Fernando Giovanni Sauceda	32	Male	Unknown	Hispanic or Latino origin	Hispanic		Killed	Armed	Handgun	Officers saw a large group of people in the front yard and saw numerous guns, including at least one high-powered rifle, police said. The scene became chaotic, and one of the men pointed a handgun at Pollard, prompting the officer to fire several times, killing Sauceda, police said.	http://www.lasvegassun.com/news/2011/jan/03/north-las-vegas-police-identify-officer-involved-f/	Jeffrey Pollard
OHClark	2014-11-15 01:54:01	2011-01-01	OH - Ohio	Clark	Enon	Clark County Sherrif	Michael Ferryman	57	Male	White	Unknown	White		Killed	Armed	Shotgun	This item was already reported by another contributor but was missing a name.	http://chronicle.northcoastnow.com/2011/01/03/dead-suspect-in-ohio-trailer-park-shootout-is-idd/		Yes	5	I've already requested to receive updates.				2011-01-01	4	No, I have an incident/more incidents to log.
CALosAngeles	2014-08-21 22:30:57	2011-01-11	CA - California	LosAngeles	unincorporated City Terrace	Los Angeles Sheriff’s Department	Nestor Torres	37	Male	White	Hispanic or Latino origin	Hispanic		Killed	Armed	Handgun	the suspect shot Deputy Mohamed Ahmed in the face. Ahmed's training officer returned fire, hitting the suspect, killing him Additional source: http://sheriff.lacounty.gov/wps/portal/lasd/!ut/p/c4/04_SB8K8xLLM9MSSzPy8xBz9CP0os3hLAwMDd3-nYCN3M19LA0_nEDPvMJMAQxNTA_2CbEdFAKnlaAw!/?current=true&urile=wcm:path:/lasd+content/lasd+site/home/lasd+family/lasd+relevant+links/deputy+mo+updates	http://www.nbclosangeles.com/news/local/Deputy-Shot-in-Face-Getting-Better-113544854.html		Yes
CALosAngeles	2014-08-21 11:05:32	2011-01-15	CA - California	LosAngeles	Los Angeles	Los Angeles Police Department	Reginald Doucet Jr.	25	Male	Black or African American	Not of Hispanic or Latino origin	Black	2	Killed	Unarmed	Unarmed	Man was behaving erratically at 3:30am, naked. Cops convinced him to put on boxers but then he tried to run multiple times. Once apprehended started hitting officers, was shot twice by one of them.	http://articles.latimes.com/2011/jan/15/local/la-me-lapd-shooting-20110115	Undisclosed	Yes
MIWashtenaw	2014-08-21 20:52:58	2011-01-15	MI - Michigan	Washtenaw	Pittsfield Township	Pittsfield Township Police	Devin Reddick	30	Male	Black or African American	Not of Hispanic or Latino origin	Black	1	Hit	Unarmed	Unarmed	Yurkunas shot Reddick shortly after he got out of a car and turned to face her, the video shows. Immediately after the shot was fired, a male officer yelled, "Put your hands up." Yurkunas told another officer at the scene Reddick had been reaching for something.	http://www.annarbor.com/news/the-washtenaw-county-prosecutors-office/	Tracy Yurkunas	Yes	1
WASpokane	2014-08-20 17:56:39	2011-01-16	WA - Washington	Spokane	Spokane	Spokane Police Department	Kenneth Dennis	26	Male	White	Unknown	White	3	Killed	Armed	Knife or cutting instrument	"Investigators say two officers arrived at the 5700 block of North Elgin Street to investigate a report of domestic violence. During the initial contact, the suspect was shot."	http://www.krem.com/news/local/Spokane-Police-involved-in-another-officer-shooting-113844794.html
TXPotter	2014-08-20 19:16:07	2011-01-30	TX - Texas	Potter	Amarillo	Amarillo Police	Claudio Trujillo	24	Male	White	Hispanic or Latino origin	Hispanic	40	Killed	Unarmed	Unarmed	"Four police officers, including a recent academy graduate, fired into a sport utility vehicle after the driver failed to heed their demands to stop, the release said." "Claudio Trujillo, 24, of Amarillo, was shot four or five times in the head, right shoulder, right foot and both legs"	http://amarillo.com/news/local-news/2011-02-03/police-fired-40-shots-shootout	Kevin Korinek, Dewayne Griffin, Gordon Eatley and Cole Thurman
FLBroward	2014-08-20 16:51:20	2011-02-01	FL - Florida	Broward	Miramar	Miramar Police Department	Herson Hilaire	28	Male	Black or African American	Unknown	Black		Killed	Unarmed	Unarmed	Two brothers shot dead by Miramar police, who claimed there was drug activity at the townhouse they were found at. Police also say the brothers tried to run an officer down. Conflicting stories from neighbors. No narcotics were found.	http://miami.cbslocal.com/2011/02/02/two-dead-police-officer-injured-in-miramar-shooting/
NMBernalillo	2014-08-21 16:25:28	2011-02-09	NM - New Mexico	Bernalillo	Albequerque	Albuquerque Police	Jacob Mitchelstein	29	Male	White	Unknown	White	2	Killed	Armed	Handgun	Economidy, who was a seven-year veteran of the department, attempted to pull Mitschelen over for an expired license tag in the parking lot of a strip mall, but Mitschelen got out of the vehicle and fled on foot. According to Economidy, Mitschelen stumbled as he was running, and a gun fell out of his clothing. Economidy said he ordered Mitschelen to drop the gun, but Mitschelen picked up the weapo…	http://www.abqjournal.com/apd-under-fire-incident-summaries#Mitschelen	Byron Economidy	Yes	3
NCWake	2014-08-20 20:27:11	2011-02-10	NC - North Carolina	Wake	Cary	Cary Police Department	Devon Mitchell	19	Male	Black or African American	Not of Hispanic or Latino origin	Black		Killed	Unarmed	Toy/fake/non-lethal gun	A mentally ill young man took several people hostage at a bank by pretending he had a gun.	http://www.wral.com/news/local/story/9106527/	Brad Manville, Ricky Burch, Sgt. Rick Glancy, Irvin Leggett, Chris Redig	Yes
FLMiamiDade	2014-08-21 15:59:32	2011-02-11	FL - Florida	MiamiDade	Miami	Miami PD	Kareem Williams	30	Male	Black or African American	Not of Hispanic or Latino origin	Black		Hit	Unarmed	Unarmed	The latest shooting apparently started when McNeil and his 30-year-old cousin, Kareem Williams, left nearby Take One Lounge strip club and headed south on N. Miami Ave. "My nephew told me said they were leaving the club -- leaving the club and got about two blocks from the club and police swarmed them. They hit the lights, they stopped. They were never given any warning about show your hands, fre…	http://blogs.miaminewtimes.com/riptide/2011/02/miami_pd_shoots_and_kills_anot.php		Yes	1
FLMiamiDade	2014-08-21 15:57:17	2011-02-11	FL - Florida	MiamiDade	Miami	Miami PD	Travis McNeil	28	Male	Black or African American	Unknown	Black		Killed	Unarmed	Unarmed	The latest shooting apparently started when McNeil and his 30-year-old cousin, Kareem Williams, left nearby Take One Lounge strip club and headed south on N. Miami Ave. "My nephew told me said they were leaving the club -- leaving the club and got about two blocks from the club and police swarmed them. They hit the lights, they stopped. They were never given any warning about show your hands, fre…	http://blogs.miaminewtimes.com/riptide/2011/02/miami_pd_shoots_and_kills_anot.php		Yes	1
FLMiamiDade	2014-08-21 22:17:58	2011-02-11	FL - Florida	MiamiDade	Miami	Miami Police Department	Travis McNeal	30	Male	Black or African American	Not of Hispanic or Latino origin	Black	4	Killed	Unarmed	Unarmed	Detective Reinaldo Goya fired into the car, shooting Williams three times and killing McNeal. The pair were unarmed.	http://www.nbcmiami.com/news/local/Unarmed-Man-Shot-By-Police-Plans-to-Sue-117007748.html	Detective Reinaldo Goya	Yes	1
CALosAngeles	2014-08-21 17:03:01	2011-02-15	CA - California	LosAngeles	Los Angeles	LAPD	Miguel Sanchez	21	Male	White	Hispanic or Latino origin	Hispanic		Hit	Armed	Firearm; not stated	An off-duty policeman parked his personal car near Denker Avenue and West 224th Street on Feb. 14 about 11:45 p.m. when he saw Sanchez running toward him with a gun, according to an LAPD news release.	http://homicide.latimes.com/post/miguel-sanchez-jr/		Yes	3
TXHarris	2014-08-21 16:48:06	2011-02-19	TX - Texas	Harris	Houston	Harris County Sheriff	Omar Ventura	29	Male	Unknown	Hispanic or Latino origin	Hispanic		Killed	Unarmed	Unarmed	Coronado claims while he was walking to his car he heard a friend calling for help and saw him on the ground being punched and kicked by 4 men. He claims one of the men reached into his waistband and he feared for his life, so he shot him. He further claims another man began advancing toward him, so he shot him, too.	http://www.civiliansdown.com/Shootings.htm	Jose Corronado	Yes	1
TXHarris	2014-08-21 16:50:18	2011-02-19	TX - Texas	Harris	Houston	Harris County Sheriff	Rolando Ventura	27	Male	White	Hispanic or Latino origin	Hispanic		Hit	Unarmed	Unarmed	Coronado claims while he was walking to his car he heard a friend calling for help and saw him on the ground being punched and kicked by 4 men. He claims one of the men reached into his waistband and he feared for his life, so he shot him. He further claims another man began advancing toward him, so he shot him, too.	http://www.civiliansdown.com/Shootings.htm	Jose Corronado	Yes	1
TXLubbock	2014-08-21 16:56:36	2011-02-20	TX - Texas	Lubbock	Lubbock	Lobbock	Jermar Antwan McKinzie	25	Male	Black or African American	Unknown	Black	2	Killed	Armed	Knife or cutting instrument	Police received a 4:24 a.m. call from Zitra Rivera, 20, reporting she and her boyfriend, McKinzie were having a domestic dispute at her residence in the Central Lubbock apartment complex.	http://lubbockonline.com/filed-online/2011-02-20/man-dead-after-officer-related-shooting-lubbock-apartment#.U_ZcRsVdWSo	Officer Jennifer Breazeale	Yes	2
CAOrange	2014-08-21 11:39:35	2011-02-21	CA - California	Orange	Anaheim Hills	Anaheim Police (off-duty)	Travis S. Mock	27	Male	White	Unknown	White	1	Hit	Unarmed	Unarmed	Lt. Tim Schmidt told investigators that Mock had pulled a black object from a jacket before the shooting. Fearing the object was a gun, Schmidt said, he fired one round. Investigators later determined the object was likely a cellphone, and Mock had been looting mailboxes near the lieutenant's home in Anaheim Hills.	http://www.ocregister.com/articles/police-289245-mock-officer.html	Tim Schmidt	Yes
MIMuskegon	2014-08-21 10:57:17	2011-02-21	MI - Michigan	Muskegon	Norton Shores	Norton Shores Police	Benjamin Arthur Kukulka	48	Male	White	Unknown	White	2	Killed	Armed	Knife or cutting instrument	Police responded to a 911 domestic call they allegedly found Kukulka holding his mother with knives in each hand. When he wouldn't drop the knives Rhyndress fired two shots into Kukulka's head killing him.	http://www.mlive.com/news/muskegon/index.ssf/2011/02/investigation_into_fatal_shoot.html	Matthew Rhyndress	Yes
PAYork	2014-08-21 11:18:40	2011-02-21	PA - Pennsylvania	York	Spring Grove	Southwestern Regional Police	Terry Lee Alfone	42	Male	White	Unknown	White		Killed	Armed	Handgun	Alfonse called his daughter and told her he was going to commit suicide and hung up, 911 was called and when officers found Alfonse he was covered in a blanket. Alfonse threw off the blanket and pointed a handgun at Officer Knouse, both officers fired at Alfonse killing him.	http://extras.mnginteractive.com/live/media/site515/2012/0315/20120315_070105_Alfone.pdf	Jamie Stalcup & Jeffrey Knouse	Yes
WAWhatcom	2014-08-21 23:05:58	2011-02-28	WA - Washington	Whatcom	Bellingham	Whatcom County Sheriff's Department, U.S. Border Patrol	Alejandro P. Martinez	30	Male	Unknown	Hispanic or Latino origin	Hispanic	2	Killed	Armed	Blunt object (clubs, hammers, etc.)	Described as mentally ill from head injury. Police called by family because destroying property. Attempt to subdue by taser failed. Attacked deputy with hammer badly enough to put him in hospital.	http://seattletimes.com/html/localnews/2014361130_apwawhatcomdeputyinjured3rdldwritethru.html		Yes	5
CALosAngeles	2014-08-22 09:06:35	2011-03-03	CA - California	LosAngeles	South Los Angeles	Los Angeles Police Department	Roger Christopher Williams	41	Male	Black or African American	Not of Hispanic or Latino origin	Black		Killed	Unarmed	Handgun	An LAPD statement says the man got out of his car, waved a gun and screamed obscenities before putting the weapon on the car roof. Police say Williams then walked toward officers, still spouting obscenities, ignored orders to stop and reached for his waistband. An officer with a rifle shot him several times. http://losangeles.cbslocal.com/2011/03/04/man-killed-in-officer-involved-shooting-in-sout…	http://losangeles.cbslocal.com/2011/03/04/man-killed-in-officer-involved-shooting-in-south-la/		Yes	2
KYHenry	2014-08-22 08:07:12	2011-03-03	KY - Kentucky	Henry	Lockport	Henry County Police	Lewis Jennings		Male	White	Not of Hispanic or Latino origin	White		Killed	Armed	Handgun	After 54 minutes of negotiations, Lewis Jennings, exited the bathroom armed with a handgun while rapidly advancing towards Trooper Manny Soto and Deputy Dean Murray. Deputy Murray attempted to subdue Lewis Jennings by deploying his taser, however was unsuccessful as the device did not make full contact. Lewis Jennings then raised his handgun and fired upon Trooper Soto and Deputy Murray. Trooper …	http://www.kentuckystatepolice.org/posts/press/2011/post5_pr03_03_11.htm	Trooper Soto and Deputy Murray	Yes	4
LAEastBatonRougeParish	2014-08-22 13:09:25	2011-03-06	LA - Louisiana	EastBatonRougeParish	Baton Rouge	Baton Rouge PD	Carlos Harris	21	Male	Black or African American	Unknown	Black	3	Killed	Unarmed	Unarmed	Harris was in a car with a friend who was supposedly driving recklessly and pulled over for drunk driving. Police ordered Harris to move the car, at which point he allegedly hit several police cars, so, to detain him, the cop fired 3 shots, one of which hit a bystander, and another of which killed Harris.	http://www.theblaze.com/stories/2014/07/26/as-they-arrested-one-drunk-driver-cops-ordered-another-drunk-man-to-move-his-friends-car-what-happened-next-proved-fatal/	Christopher Magee	Yes	2	Add me!	Carmen Myers	carmen.myers@gmail.com
MAMiddlesex	2014-08-22 02:27:51	2011-03-10	MA - Massachusetts	Middlesex	Framingham	Framingham Police Department	Eurie Stamps	68	Male	Black or African American	Unknown	Black	1	Killed	Unarmed	Unarmed	During a narcotics investigation (Stamps was not the suspect), the officer tripped and fell while attempting to handcuff and search Stamps and his rifle went off killing Stamps. The article I found was dated 3/10/2011 but the shooting occurred on January 5th of that year.	http://www.boston.com/news/local/massachusetts/articles/2011/03/10/officer_in_fatal_shooting_will_not_be_charged/	Paul Duncan	Yes	1
NJBergen	2014-08-23 11:27:38	2011-03-12	NJ - New Jersey	Bergen	Washington Township	Washington Township Police Department	Robert Ellis	48	Male	White	Not of Hispanic or Latino origin	White		Killed	Armed	Rifle	Police were called to the house as part of a domestic disturbance call at 1:30 AM. Robert Ellis was on the porch of his parents' home with a gun, and allegedly fired several times at the approaching officers. Police returned fire. The gun battle lasted 15 to 30 minutes.	http://www.nj.com/news/index.ssf/2011/03/washington_township_man_is_sho.html		Yes	5	Add me!	Elizabeth	gildedlily@gmail.com
PAPhiladelphia	2014-08-22 18:31:53	2011-03-13	PA - Pennsylvania	Philadelphia	North Philadelphia	Philadelphia Police Department	Carmelo Winans	29	Male	Black or African American	Hispanic or Latino origin	Black	2	Killed	Armed	Grabbed officer's weapon	Two officers responded to a home at 2:30 p.m., where Carmelo Winans, described as suicidal, was in the kitchen with a knife. He dropped the knife. One officer (Richard Nicoletti) approached; Winans grabbed the officer's gun and it discharged, hitting the officer's vest. The second officer (Matthew McCarthy) fired on the man and killed him. The victim's family believed the shooting was not justifi…	http://abclocal.go.com//story?section=news/crime&id=8010899	Matthew McCarthy	Yes	2	Add me!	Katy	kscott@mbayaq.org	@katyscott22
FLBroward	2014-08-23 01:05:47	2011-03-15	FL - Florida	Broward	Tamarac	Broward Metro Drug Task Force	Seyoum Samuels	18	Male	Black or African American	Unknown	Black		Killed	Armed	Handgun	Drug task force officers staged a fake drug house robbery with Samuels and three others. A SWAT team entered the building and ordered their surrender. Everyone complied except Samuels who hid behind a pile of tires. They say he reached for a weapon in his waistband and the SWAT members opened fire, shooting him several times. He died despite wearing a bullet proof vest.	http://sheriff.org/posts/post.cfm?id=3c5f2c8f-1dca-4a33-8e15-e18c43965bb8		Yes	3	I've already requested to receive updates.
NYNassau	2014-08-23 01:39:53	2011-03-15	NY - New York	Nassau	Long Island	Nassau County Police Department	Anthony DiGeronimo	21	Male	White	Unknown	White		Killed	Armed	Knife or cutting instrument	DiGeronimo is said to have threatened a neighbor with a knife and then barricaded himself in his room at home. At some point the police say they were threatened with the knife and 2 officers shot DiGeronimo. Afterwards, one of the officers also shot another plainclothes officer when yet another officer yelled "gun."	http://www.newsday.com/long-island/nassau/dad-police-should-not-have-killed-my-son-1.2760694	2 Officers	Yes	2	I've already requested to receive updates.
OKTulsa	2014-08-23 15:09:05	2011-03-16	OK - Oklahoma	Tulsa	Tulsa	Tulsa Police Department	Marvin Dion Alexander	31	Male	Black or African American	Not of Hispanic or Latino origin	Black		Killed	Armed	Handgun	A Tulsa Police officer shot and killed a man at the Fairmont Terrace apartments at 61st and Peoria Wednesday afternoon. The man has been identified as 31-year-old Marvin Dion Alexander. A search of Oklahoma Department of Corrections website shows that Alexander has a lengthy record dating back to 1998. He has served time for drug, burglary and weapons charges. The shooting was reported at about 3…	http://www.newson6.com/story/14265037/tulsa-officer-involved-in-fatal-shooting		Yes		No thanks.
FLDuval	2014-08-22 15:35:38	2011-03-17	FL - Florida	Duval	Jacksonville	Jacksonville Sheriff's Office	Herbert Earl Harris		Male	Black or African American	Unknown	Black	5	Killed	Armed	Handgun	Harris was armed with a semi-automatic handgun, gun in hand before police arrived. Officers on scene were undercover narcotics agents with search warrants for Harris's apartment and another apartment in the same building. Officer's identity is protected because he is undercover. Harris had warrants out for his arrest in Ohio for violation of probation. Suspect sells marijuana and powder cocaine o…	https://www.youtube.com/watch?v=8O-pRlu7GKI		Yes	3	No thanks.
MDMontgomery	2014-08-20 15:46:49	2011-03-25	MD - Maryland	Montgomery	Silver Spring	Montgomery County Police Department	Carlos Enrico McDonald	32	Male	Unknown	Hispanic or Latino origin	Hispanic	3	Hit	Armed	Knife or cutting instrument	Police responded to the area after the man had gone into a jewelry store and acted in a threatening manner to the clerk, who asked him to leave. She fled out another entrance. Police say a man carrying a large, jagged-edge bottle advanced on an officer. The officer first tased the man, to no effect, and then shot him multiple times.	http://www.tbd.com/articles/2011/03/man-shot-by-montgomery-co-cop-in-aspen-hill-57282.html	Donald Hayes
MEYork	2014-08-23 00:13:59	2011-03-27	ME - Maine	York	Kennebunk	Kennebunk Police Department	Katherine Paulson	39	Female	White	Not of Hispanic or Latino origin	White	4	Killed	Armed	Knife or cutting instrument	Morneau and another officer arrived at the Paulson home after a call from Paulson's mother reporting a domestic dispute. When Morneau entered the home Paulson grabbed a knife and advanced on the officer. Morneau told Paulson to drop the knife but she continued toward him until he shot her 4 times. The entire encounter only took 19 seconds from Morneau entering the home to Paulson's death	http://www.maine.gov/ag/news/article.shtml?id=279610	Joshua Morneau	Yes	2	I've already requested to receive updates.
CAContraCosta	2014-08-23 15:27:05	2011-03-28	CA - California	ContraCosta	Bay Point	Contra Costa Sheriff	Johnny Angel Ochoa	24	Male	Unknown	Hispanic or Latino origin	Hispanic	2	Killed	Armed	Vehicle	Victim rammed squad cars, was shot.	http://abc7news.com/archive/8038599/		Yes	5	No thanks.
NYMadison	2014-08-22 13:59:31	2011-04-01	NY - New York	Madison	Canastota	New York State Police	Justin Arnold	17	Male	White	Unknown	White	10	Killed	Armed	Toy/fake/non-lethal gun	Deemed suicide by cop; victim called in his own fabricated car jacking, goaded the police into a chase, and drew his pellet gun when he was tracked down	http://abcnews.go.com/US/teen-dead-suicide-by-cop/story?id=13274327		Yes	4	Add me!	Tyler Schlichenmeyer	tyler.schlichenmeyer@gmail.com	@schlichenslide
CALosAngeles	2014-08-27 00:06:10	2011-04-02	CA - California	LosAngeles	Rialto	Rialto Police Department	Anastacio Verduzco Jr.,	45	Male	Unknown	Hispanic or Latino origin	Hispanic	2	Killed	Armed	Bricks	Victim had a history of violent interactions with the police. He had been diagnosed as bipolar twenty years previously and often acted out. On this occasion victim's sister called the police and officer Anderson responded. Anderson told victim to calm down, Victim picked up a brick and threatened Anderson. Anderson attempted to tase Victim who then came at him with the brick and Anderson then sho…	http://www.sbcountyda.org/Portals/8/PressReleases/2013/(3-14)%20OIS%20-%20ANDERSON%20REPORT.pdf	Glen Anderson	Yes	1	I've already requested to receive updates.				2011-06-02	3	No, I have another incident to log.
FLPinellas	2014-08-27 00:18:57	2011-04-02	FL - Florida	Pinellas	St. Petersburg	St. Petersburg Police Department	Pamela Dale Kirk	53	Female	White	Not of Hispanic or Latino origin	White	3	Killed	Armed	Handgun	Officers were making a Wellness Check on Kirk. She had been taken into police custody several times due to suicidal threats. On this occasion officers knocked on the door, there was no answer and then Kirk showed up at the door with a loaded revolver pointed at officers. Dolch was the initial officer's backup and shot Kirk through a window	http://www.stpete.org/police/releases/may13/05-08-13officer-shooting-update4.pdf	Christopher Dolch	Yes	2	I've already requested to receive updates.				2013-04-28	3	No, I have another incident to log.
TNHamilton	2014-08-23 01:12:16	2011-04-02	TN - Tennessee	Hamilton	Chatanooga	Hamilton County Police	Jesse Matthews		Male	White	Not of Hispanic or Latino origin	White	12	Hit	Armed	Firearm; not stated	Officers responded to the silent alarm at a US Money Shop. Matthews was attempting to run from the scene and shot and killed a Hamilton County officer. After killing the officer, Matthews and other officers began a firefight the ended with Matthews being shot at least 12 times and suffering non-fatal injuries	http://www.wrcbtv.com/story/14370698/officer-injured-responding-to-armed-robbery		Yes	5	I've already requested to receive updates.
UTSaltLake	2014-08-20 15:54:00	2011-04-11	UT - Utah	SaltLake	West Valley	West Valley Police Department	Sean Krummi	23	Male	White	Not of Hispanic or Latino origin	White	2	Killed	Armed	Airsoft Pellet Gun	Krummi got into an argument with his mother during which she locked herself into her room, called 911 and informed officers that Krummi was violent and under the influence of drugs/alcohol. When officers arrived at the scene Krummi was sitting in a chair in the front yard holding the Airsoft pellet gun. Officers thought the pellet gun was a handgun and two officers shot at Krummi with Black firin…	http://slco.org/districtattorney/pdf/L-JohnsonBlackPress11-0422.pdf	David Black
ARPoinsett	2014-08-20 17:00:09	2011-04-12	AR - Arkansas	Poinsett	Trumann	Trumann Police Department	Jerry Lard	37	Male	White	Not of Hispanic or Latino origin	White	15	Hit	Armed	Firearm; not stated	Officers Schmidt and Overstreet pulled Lard's vehicle over for a routine traffic stop. Lard pulled out a gun and started shooting at the officers, shooting Schmidt in the face and killing him. Lard was shot at least once by one of the officers and received minor injuries. Lard is currently on death row in Arkansas in connection with this shooting	http://www.kait8.com/story/14435936/officer-involved	Officer Jonathan Schmidt and Officer Corey Overstreet
TNKnox	2014-08-21 20:22:48	2011-04-14	TN - Tennessee	Knox	Knoxville	Knoxville City PD	Guy Ronald McDowell	34	Male	White	Unknown	White	8	Killed	Armed	Toy/fake/non-lethal gun	Guy called 911 saying there was going to be a shootout. Later called back saying he had warrants and wanted to turn himself in. Officer responded and pulled him over. Guy got out of car and brandished pellet gun and returned to car. Officers followed him. Guy suddenly stopped. It is not clear from the video what happened at the second stop, but he was shot shortly after stopping his vehicle. Dash…	http://www.wate.com/story/14451427/knoxville-man-who-threatened-officers-shot-and-killed-on-i-275		Yes	5
OHHamilton	2014-08-20 13:48:15	2011-04-18	OH - Ohio	Hamilton	Cincinnati	Cincinnati Police	David "Bones" Hebert	40	Male	White	Not of Hispanic or Latino origin	White	3	Killed	Unarmed	a knife was found 25' from victims body	http://www.friendsofbones.org/	http://www.friendsofbones.org/	Cincinnati Police Sergeant Andrew Mitchell
PAPhiladelphia	2014-08-20 16:40:25	2011-04-18	PA - Pennsylvania	Philadelphia	Upper Darby	Upper Darby Police Department	Aikee Holloman	23	Male	Black or African American	Not of Hispanic or Latino origin	Black	2	Killed	Unarmed	Unarmed	Police were looking for a stolen car that the suspect in several robberies was driving. Officers saw a car matching the description and followed the driver, Holloman, into a convenience store. Holloman reached for his waistband and officers told him three times to raise his hands. When he did not, both officers shot at Holloman who was struck once. Search of the vehicle revealed that it was the s…	http://articles.philly.com/2011-04-19/news/29447560_1_gas-station-property-charges-officers
WIMonroe	2014-08-20 15:38:48	2011-04-22	WI - Wisconsin	Monroe	Tomah	Tomah Police Department	Seth M. McCloskey	28	Male	White	Not of Hispanic or Latino origin	White		Killed	Armed	Firearm; not stated	McCloskey was stopped in connection with officers' investigation of a hit-and-run shooting that had occurred earlier the same day. McCloskey exited his vehicle and began shooting at the officers and one officer received a gun shot wound. Officers then returned fire, McCloskey got back into his car and died in the vehicle	http://tomahpolice.com/news/april262011.htm	Sergeant Chris Weaver, Sergeant Scott Holum, Officer Josh Kenworthy and Officer Jennifer Helgerson
CAStanislaus	2014-08-22 15:30:53	2011-04-24	CA - California	Stanislaus	Modesto	Modesto Police Dept	Jeremey Dee Atkinson	38	Male	White	Not of Hispanic or Latino origin	White		Killed	Armed	Knife or cutting instrument	officers responded to armed robbery call, tracked down suspect who was running on foot through neighborhood. suspect was asked to surrender, he did not and while reaching into his wasteband was shot by officers and killed. turns out suspect was unarmed at the time of the shooting- he only had a knife in his wasteband having discarded his handgun in a nearby field.	http://www.modbee.com/2011/05/31/1712558/rifle-knife-found-after-modesto.html		Yes	2	I've already requested to receive updates.
MAHampden	2014-08-20 15:09:40	2011-04-30	MA - Massachusetts	Hampden	Springfield	Massachusetts State Police and Springfield Police	Tamik Kirkland	25	Male	Black or African American	Unknown	Black		Hit	Armed	Unknown	Kirkland, 26, of Springfield broke out of the minimum security state prison in Shirley after hearing his mother had been shot in Springfield, authorities said. He is charged with the April 30, 2011, fatal shooting of a Sheldon Innocent, a barbershop customer at Bill Brown’s House of Beauty on State Street. He is also charged in the shooting and wounding of Daryl King, a barber. State and city pol…	http://www.masslive.com/news/index.ssf/2013/05/hampden_district_attorney_mark_15.html	Stephen Gregorczyk and Raul Gonzalez
SCOrangeburg	2014-08-20 14:47:30	2011-05-02	SC - South Carolina	Orangeburg	Eutawville	Eutawville Police Department	Bernard Bailey	54	Male	Black or African American	Unknown	Black	2	Killed	Unarmed	Unarmed	Eutawville Police Chief Richard Combs shot the victim multiple times in the town hall parking lot after an argument in the building over a parking ticket. http://thetandd.com/news/local/crime-and-courts/grand-jury-accuses-former-eutawville-police-chief-richard-combs-of/article_af29d856-0559-11e3-9c21-001a4bcf887a.html	http://www.wistv.com/story/14570229/investigation-continues-after-police-chief-fatally-shoots-man	Richard Combs
TXTomGreen	2014-08-20 14:58:59	2011-05-04	TX - Texas	TomGreen	San Angelo	San Angelo Police Department	Martin Pena	19	Male	Unknown	Hispanic or Latino origin	Hispanic	1	Killed	Armed	Handgun	The officer attempted to pull over a "suspicious vehicle". The victim fled in the vehicle for about thirty seconds, then the victim left the car and fled on foot. The officer found the victim hiding in a parked car. When the officer asked the victim to get out of the car he did so. The officer saw a gun in his hand, and opened fire, killing the victim.	http://abc13.com/archive/8113116/
AZPima	2014-08-25 17:23:00	2011-05-05	AZ - Arizona	Pima	Tucson	Pima County SWAT officers	Jose Manuel Guerena Ortiz	26	Male	White	Hispanic or Latino origin	Hispanic	71	Killed	Armed	Rifle	SWAT team executed a warrant to search Jose's home in relation to an ongoing investigation into drug smuggling. They came in the morning and began to attack his home. He had a rifle in his hand, and the SWAT team said they saw shots being fired at them, so they shot him. It was later found out that Jose fired no shots.	http://en.wikipedia.org/wiki/Jose_Guerena_shooting		Yes	1	I've already requested to receive updates.				2011-05-05	1	This is the first incident I am logging.
NYOnondaga	2014-08-25 20:36:25	2011-05-06	NY - New York	Onondaga	Syracuse	Syracuse Police Department, Onondaga County Sheriff's Office	Benjamin Campione	55	Male	White	Not of Hispanic or Latino origin	White		Killed	Armed	Toy/fake/non-lethal gun	Officials claimed it was "suicide by cop."	http://www.cnycentral.com/news/story.aspx?id=614369	Detective/Sgt. Anthony Rossillo, Deputy Michael Hoosock, Deputy Adam Quku	Yes	1	I've already requested to receive updates.				2011-05-05	1	This is the first incident I am logging.
TXHarris	2014-08-26 14:49:29	2011-05-07	TX - Texas	Harris	Houston	Houston PD	Jesse Brown	20	Male	Black or African American	Unknown	Black	2	Hit	Armed	Other Gun	Brown was boarding a bus when a ticket agent noticed a gun in his bag. He was tasered and eventually shot in the side.	http://civiliansdown.com/site/jesse-brown-media-reports/#sthash.CsKFYwcS.dpbs	Timothy Moore	Yes	2	I've already requested to receive updates.				2011-05-07	1	No, I have another incident to log.
CTHartford	2014-11-15 02:51:20	2011-05-09	CT - Connecticut	Hartford	Manchester	Manchester Police	Edmanuel Reyes		Male	Unknown	Hispanic or Latino origin	Hispanic		Killed	Armed	Handgun	Suspect was involved in an armed standoff wherein he held his wife and two children in their homes and fired 75-150 rounds both inside the home and at police during the course of the event. Police were in communication with the suspect throughout the standoff, and he eventually released his family. Shortly after he was shot in the head by a police sniper while in his doorway. The officer in charg…	http://www.ct.gov/despp/cwp/view.asp?A=4226&Q=495160	sniper	Yes	5	I've already requested to receive updates.				2011-05-19	1	No, I have an incident/more incidents to log.
CALosAngeles	2014-08-22 16:47:03	2011-05-10	CA - California	LosAngeles	Los Angeles	Undercover Officer LAPD	Dale Garrett	51	Male	Black or African American	Not of Hispanic or Latino origin	Black		Killed	Armed	Knife or cutting instrument	undercover officers see man cutting up drugs on side of street, confrontation ensues, man pulls out knife, officers step back and shoot him multiple times.	http://homicide.latimes.com/post/dale-garrett/		Yes	1	I've already requested to receive updates.
NMBernalillo	2014-08-22 16:37:22	2011-05-10	NM - New Mexico	Bernalillo	Albuquerque	Albuquerque Police Department	Alan Gomez	22	Male	Unknown	Hispanic or Latino origin	Hispanic	1	Killed	Unarmed	Unknown	SWAT team responds to hostage situation. Suspect is asked to come out of the house, he comes out [unarmed] and is shot by officer. Turns out suspect has history of mental health issues. Suspect/victim's family sued the city of ABQ and won.	http://www.abqjournal.com/320180/news/shooting-costs-city-900k.html	Sean Wallace	Yes	1	I've already requested to receive updates.
NYNewYork	2014-08-26 15:06:16	2011-05-11	NY - New York	NewYork	New York	NYPD			Male	Unknown	Hispanic or Latino origin	Hispanic	3	Killed	Armed	Handgun	DUPLICATE ENTRY "On May 11, at 1934 hours, in the confines of the 83rd Precinct, an undercover detective executing a firearms purchase was the victim of a gunpoint-robbery attempt. The undercover officer had arranged to meet an illegal firearms dealer and purchase several guns. Upon arriving at the agreed location, both the seller and the undercover officer were accosted by a male Hispanic armed …	http://www.nyc.gov/html/nypd/downloads/pdf/analysis_and_planning/nypd_annual_firearms_discharge_report_2011.pdf		Yes	4	I've already requested to receive updates.				2014-05-11	4	No, I have another incident to log.
MIWayne	2014-08-22 01:30:32	2011-05-16	MI - Michigan	Wayne	Detroit	Detroit Police Department Special Response Team	Aiyana Mo'Nay Stanley Jones	7	Female	Black or African American	Not of Hispanic or Latino origin	Black	1	Killed	Unarmed	Unarmed	SWAT raided a house on a murder warrant, and an officer's gun was accidentally discharged into Aiyana.	http://en.wikipedia.org/wiki/Death_of_Aiyana_Jones	Joseph Weekley	Yes	1
FLAlachua	2014-08-26 16:11:07	2011-05-18	FL - Florida	Alachua	High Springs	High Springs PD and Alachua County Sheriff	Robert Nodine	63	Male	White	Unknown	White	2	Hit	Armed	Handgun	The victim entered the school and was removed. He was there about a custody case and was noticed fidgeting by sheriff.	http://www.gainesville.com/article/20110518/ARTICLES/110519510?p=1&tc=pg	High Springs Police Sgt. Charles Harper and Alachua County Sheriff's Deputy Brian Philips	Yes	1	I've already requested to receive updates.				2011-05-18	1	No, I have another incident to log.
GACobb	2014-08-26 16:22:57	2011-05-19	GA - Georgia	Cobb	Mableton	Cobb County Sheriff	Matt Murdock	34	Male	White	Unknown	White	2	Killed	Unarmed	Unarmed	It was a suspected burglary traffic stop gone wrong.	http://www.mdjonline.com/view/full_story/18064692/article-Family-still-waiting-on-answers-after--fatal-shooting-of-Matt-Murdock-by-police	Sean Henry	Yes	1	I've already requested to receive updates.				2011-05-19	4	No, I have another incident to log.
CAVentura	2014-08-26 18:29:52	2011-05-20	CA - California	Ventura	Ventura	Ventura Police Department	Mario Lopez	44	Male	White	Hispanic or Latino origin	Hispanic		Killed	Armed	Knife or cutting instrument	Police were responding to a domestic disturbance call at a home on Leighton Drive. Authorities allege that Lopez rushed an officer with a knife in hand and was shot.	http://abclocal.go.com//story?section=news/local/ventura_county&id=8144787		Yes	5	Add me!	Daniel Friedheim	dfriedheim@gmail.com	oriolesfan	2011-05-20	2	No, I have another incident to log.
NYOntario	2014-08-26 16:30:22	2011-05-20	NY - New York	Ontario	Geneva	Geneva PD	William "Corey" Jackson	34	Male	Black or African American	Unknown	Black	1	Killed	Unarmed	Unarmed	The Geneva police officer involved in the May 20, 2011 shooting thought Jackson was reaching under the seat for a weapon, it turned out to be a cell phone. The officer involved, Carmen "Scott" Reale, was cleared of any wrongdoing by an Ontario County Grand Jury. Reale was placed on administrative leave immediately after the shooting and he still has not returned to the police force.	http://fingerlakesdailynews.com/news/details.cfm?clientid=16&id=32812#.U_ztwMVdWSp	Carmen "Scott" Reale	Yes	1	I've already requested to receive updates.				2011-05-20	2	This is the first incident I am logging.
NYOntario	2014-08-27 16:33:50	2011-05-23	NY - New York	Ontario	Geneva	Geneva Police Department	William Corey Jackson	33	Male	Black or African American	Not of Hispanic or Latino origin	Black	1	Killed	Armed	Knife or cutting instrument	Victim was a backseat passenger at a traffic stop, was wanted for questioning, "made some movement in the backseat bending over... came up with something the officer thought was a weapon."	http://rochester.twcnews.com/content/news/544192/geneva-man-shot-by-police-dies/	Sgt. Carmen Reale	Yes	1	I've already requested to receive updates.				2011-05-20	1	No, I have an incident/more incidents to log.
ILCook	2014-08-22 15:50:29	2011-05-25	IL - Illinois	Cook	Chicago	Chicago Police	Tatioun Williams	15	Male	Black or African American	Not of Hispanic or Latino origin	Black		Killed	Unarmed	Unarmed	police respond to armed robbery call- identify two suspects walking down the street. tell suspects to stop, one suspect turns around and points gun at officers- officer then shoots and kills unarmed suspect in the back. in a crazy twist- the armed suspect is then charged with the other suspect's murder even though it was the police that killed him.	http://articles.chicagotribune.com/2011-05-27/news/ct-met-teen-shot-by-police-20110526_1_robbery-victim-tribune-reporter-deanese-williams-harris-teens		Yes	1	I've already requested to receive updates.
GADeKalb	2014-08-27 16:30:48	2011-05-27	GA - Georgia	DeKalb	Atlanta	DeKalb County Police			Female	White	Unknown	White	3	Killed	Unarmed	Unarmed	grandma bandit	http://onlineathens.com/stories/052711/bre_835882280.shtml		Yes	2	I've already requested to receive updates.				2011-05-27	5	No, I have an incident/more incidents to log.
NVClark	2014-08-27 16:21:35	2011-05-27	NV - Nevada	Clark	Las Vegas	Metro police	Alberto Castillo	35	Male	Unknown	Hispanic or Latino origin	Hispanic	3	Killed	Armed	screwdriver	Domestic violence related	http://www.lasvegassun.com/news/2011/may/31/coroner-identifies-man-shot-police-after-domestic-/	Robert S. Thompson and Baudelio Gastelum	Yes	2	I've already requested to receive updates.				2011-05-24	1	This is the first incident I am logging.
AZMaricopa	2014-08-28 07:23:10	2011-05-29	AZ - Arizona	Maricopa	Glendale	Glendale Police	Jeremiah Wilson Pulaski	24	Male	White	Not of Hispanic or Latino origin	White		Killed	Armed	Handgun	Returned veteran said to be suffering from PTSD in a shooting incident at a restaurant, engaged in gunfight with officer immediately after, fatally wounded.	http://www.veteranstoday.com/2011/05/29/bronze_star_for_valor_cops_bullet/?utm_source=rss		Yes	4	No thanks.				2011-05-26	2	No, I have an incident/more incidents to log.
AZPima	2014-08-28 07:30:28	2011-05-29	AZ - Arizona	Pima	Tuscon	Tuscon Police	Adrian Quevedo	25	Male	White	Hispanic or Latino origin	Hispanic		Hit	Armed	Handgun	Officers responded to report of an argument and gunshot. After officers arrived, Quevedo ran "flaunting and handgun". He was pursued, he pointed the gun at officers, and was shot.	http://tucson.com/news/local/crime/law-order-briefs/article_5950c8fe-21c9-5e2b-ad01-6e97495956c1.html		Yes	3	No thanks.				2011-05-29	3	No, I have an incident/more incidents to log.
FLMiamiDade	2014-08-20 16:09:40	2011-05-30	FL - Florida	MiamiDade	Miami Beach	Miami Beach Police Department	Raymond Herisse	22	Male	Black or African American	Unknown	Black		Killed	Armed	Car	Raymond Herisse died when shot in his car after a police chase and hitting officers with his car. When trying to capture Herisse, 11 police officers opened fire on a crowded South Beach street, shooting more than 100 times at an erratic driver they said was armed and attempting to run them over. The driver was killed, and Saint Louis and three other bystanders were wounded during Urban Beach Week…	http://www.palmbeachpost.com/news/news/crime-law/one-killed-seven-injured-during-police-involved--1/nLspJ/
FLMiamiDade	2014-08-20 16:02:47	2011-05-30	FL - Florida	MiamiDade	Miami Beach	Miami Beach Police Department	Carlson Saint Louis	25	Male	Black or African American	Not of Hispanic or Latino origin	Black		Hit	Unarmed	Unarmed	Innocent bystander in a police shootout in which 11 police officers opened fire on a crowded South Beach street, shooting more than 100 times at an erratic driver they said was armed and attempting to run them over. The driver was killed, and Saint Louis and three other bystanders were wounded during Urban Beach Weekend, the annual Miami Beach hip-hop and rap street festival.	http://www.palmbeachpost.com/news/news/wounded-urban-beach-bystanders-wait-for-answers--1/nL2kH/
FLMiamiDade	2014-08-20 16:05:11	2011-05-30	FL - Florida	MiamiDade	Miami Beach	Miami Beach Police Department	Cedrick Perkins		Male	Black or African American	Not of Hispanic or Latino origin	Black		Hit	Unarmed	Unarmed	Innocent bystander and one of three people shot when 11 police officers opened fire on a crowded South Beach street, shooting more than 100 times at an erratic driver they said was armed and attempting to run them over. The driver was killed, and Saint Louis and three other bystanders were wounded during Urban Beach Weekend, the annual Miami Beach hip-hop and rap street festival.	http://www.palmbeachpost.com/news/news/wounded-urban-beach-bystanders-wait-for-answers--1/nL2kH/
FLMiamiDade	2014-08-20 16:04:11	2011-05-30	FL - Florida	MiamiDade	Miami Beach	Miami Beach Police Department	Crystal Rivera		Female	Unknown	Hispanic or Latino origin	Hispanic		Hit	Unarmed	Unarmed	Innocent bystander and one of three people shot when 11 police officers opened fire on a crowded South Beach street, shooting more than 100 times at an erratic driver they said was armed and attempting to run them over. The driver was killed, and Saint Louis and three other bystanders were wounded during Urban Beach Weekend, the annual Miami Beach hip-hop and rap street festival.	http://www.palmbeachpost.com/news/news/wounded-urban-beach-bystanders-wait-for-answers--1/nL2kH/
NMBernalillo	2014-08-20 17:41:52	2011-06-04	NM - New Mexico	Bernalillo	Albuquerque	Albuquerque Police Department	Raymond Leroy Garcia	41	Male	Unknown	Hispanic or Latino origin	Hispanic		Killed	Armed	Firearm; not stated	Officers shot Garcia after a high speed chase during which he apparently pointed a gun at them and may have fired	http://www.abqjournal.com/34864/news/shooting-victim-had-criminal-history.html	Troy Nikko, William Thomas and Michael Oates
ILCook	2014-08-27 19:20:38	2011-06-07	IL - Illinois	Cook	Chicago	Chicago Police Dept.	Flint Farmer	29	Male	Black or African American	Unknown	Black	3	Killed	Unarmed	Handgun	Chicago police officer Gildardo Sierra, 32, admitted that he drank “multiple beers” before killing Flint Farmer in June, 2011 and has settled a civil lawsuit with Farmer’s estate for an undisclosed amount, reports the Chicago Tribune. It was Sierra’s second fatal shooting in a 6 month period. Chicago Tribune reports: A video of the incident shows Officer Gildardo Sierra firing three shots into Fl…	http://wgntv.com/2013/02/09/chicago-to-pay-4-1-million-in-fatal-police-shooting/	Gildardo Sierra	Yes	1	Add me!	Don Daniel	daniel.don3@gmail.com		2011-06-07	1	This is the first incident I am logging.
AZMaricopa	2014-08-28 14:06:42	2011-06-10	AZ - Arizona	Maricopa	Scottsdale	Scottsdale PD	Derek Ryan Eckles	26	Male	White	Unknown	White	1	Hit	Armed	Firearm; not stated	Called police about a bomb threat and barricaded himself in a hotel room.	http://www.azfamily.com/news/Man-gets-20-years-for-officer-involved-shooting-at-Scottsdale-hotel-148965505.html		Yes	2	I've already requested to receive updates.				2011-06-10	4	No, I have an incident/more incidents to log.
OHCuyahoga	2014-08-27 17:45:41	2011-06-11	OH - Ohio	Cuyahoga	East Cleveland	East Cleveland Police Department	Charles Eskridge	39	Male	Black or African American	Not of Hispanic or Latino origin	Black	2	Hit	Unarmed	Unarmed	Detective Ernest Stanford, age 62, was working as off-duty security at a store that Charles Eskridge tried to rob. During the scuffle, Stanford shot the unarmed Eskridge twice - once in the leg and once in the face. Eskridge was charged with "felonious assault and other gun charges" which were all dropped on March 9, 2011. Stanford was convicted of robbery and sentenced to 3 years.	http://www.wkyc.com/video/820115150001/0/Charges-dropped-in-police-involved-shooting	Detective Ernest Stanford	Yes	4	Add me!		charger81@yahoo.com		2010-07-01	1	This is the first incident I am logging.
ILCook	2014-08-22 01:38:04	2011-06-15	IL - Illinois	Cook	Chicago	Chicago Police	Pedro Gonzalez III	21	Male	Black or African American	Unknown	Black		Killed	Armed	Handgun	Pedro was mourning the death of his friend, Jovany, shot by police earlier that week. The police approached and Pedro began running. According to the officers he then turned and brandished his weapon at which point they opened fire.	http://abclocal.go.com//story?section=news/local&id=8192875		Yes	3
PAPhiladelphia	2014-08-24 19:58:31	2011-06-17	PA - Pennsylvania	Philadelphia	Philadelphia	14th District Officers	Eric Crawley	39	Male	Black or African American	Unknown	Black	1	Killed	Armed	Firearm; not stated	Eric Crawley arrived at the scene of a domestic dispute involving his sister. The police say he had a holstered weapon and he drew it after being told not to. The family says they called Crawley for help and he did have a legal holstered firearm but that he never drew it. An unidentified officer shot him once. http://articles.philly.com/2011-06-18/news/29674342_1_gun-police-officer-septa-bus-driv…	http://abclocal.go.com//story?section=news/crime&id=8196568		Yes	1	I've already requested to receive updates.
CASanBernardino	2014-08-24 20:21:10	2011-06-18	CA - California	SanBernardino	Fontana	Fontana Police Department	Jonathan Ordonez	27	Male	Unknown	Hispanic or Latino origin	Hispanic	30	Killed	Armed	Vehicle	The police say it was a traffic stop that led to a brief chase. When they stopped Ordonez allegedly attempted to use the vehicle as a weapon so the officers opened fire and let off as many as 30 shots. Ordonez suffered from depression and was set to graduate from college the following week according to the family.	http://www.courant.com/topic/ktla-fontana-police-shooting,0,5706634.story		Yes	3	I've already requested to receive updates.
AZCoconino	2014-08-27 16:47:06	2011-06-19	AZ - Arizona	Coconino	Page	Coconino County Sheriff's Office	William Foust	50	Male	White	Not of Hispanic or Latino origin	White	1	Killed	Unarmed	Unarmed	Wilson and Foust went outside the business and were soon involved in a physical altercation. Foust, according to the sheriff's office, attempted to gain control of the officer's Taser. "The officer discharged his service weapon, striking Foust," stated a press release issued by the sheriff's office.	http://azdailysun.com/news/local/crime-and-courts/page-officer-kills-man-in-dv-incident/article_61e27d9d-6d47-5655-8a71-d28b846d8e3e.html	Shawn Wilson	Yes	3	I've already requested to receive updates.				2011-06-19	2	No, I have an incident/more incidents to log.
CALosAngeles	2014-08-28 14:41:10	2011-06-22	CA - California	LosAngeles	Los Angeles	Los Angeles police	Mario Vanegas	45	Male	Unknown	Hispanic or Latino origin	Hispanic	3	Killed	Armed	Knife or cutting instrument		http://homicide.latimes.com/post/mario-vanegas/		Yes	1	I've already requested to receive updates.				2011-06-22	1	This is the first incident I am logging.
CALosAngeles	2014-08-28 14:57:00	2011-06-23	CA - California	LosAngeles	Los Angeles		William Quiros, Jr	32	Male	Unknown	Hispanic or Latino origin	Hispanic	2	Killed	Armed	Handgun	Victim was a supposed gang member and known to police.	http://homicide.latimes.com/post/william-quiros-jr/		Yes	1	I've already requested to receive updates.				2011-06-23	4	No, I have an incident/more incidents to log.
CASanFrancisco	2014-08-28 15:42:35	2011-06-29	CA - California	SanFrancisco	San Fransisco	San Francisco PD	Roselyndo Nagayo Sicat		Male	Unknown	Hispanic or Latino origin	Hispanic	2	Killed	Armed	Other Gun	Victim was wanted and a parolee.	http://sanfrancisco.cbslocal.com/2011/06/29/police-shooting-shuts-busy-san-francisco-intersection/		Yes	2	I've already requested to receive updates.				2011-06-29	1	No, I have an incident/more incidents to log.
CAVentura	2014-08-28 15:32:34	2011-06-29	CA - California	Ventura	Ventura	Ventura PD	Jesus Varias		Male	Unknown	Hispanic or Latino origin	Hispanic	1	Hit	Unarmed	Unknown	Victim was being sought for murder. Victim was shoot in back and paralyzed.	http://sespesun.com/archives/3772		Yes	2	I've already requested to receive updates.				2011-06-29	1	This is the first incident I am logging.
FLOsceola	2014-08-28 15:49:53	2011-06-29	FL - Florida	Osceola	St Cloud	St Cloud police	Elba Luz Cartagena		Female	Unknown	Hispanic or Latino origin	Hispanic	2	Killed	Armed	Handgun		http://ksib.net/2011/06/title_42	Sergeant Jared Daniel and Officer John Nettles	Yes	2	I've already requested to receive updates.				2011-06-29	4	No, I have an incident/more incidents to log.
FLMiamiDade	2014-08-28 16:05:56	2011-06-30	FL - Florida	MiamiDade	Miami	Miami-Dade police	Antonio Andrew	35	Male	Black or African American	Not of Hispanic or Latino origin	Black	2	Killed	Armed	Other Gun	Was killed with 3 others in drug bust gone wrong	http://www.miamidade.gov/police/releases/PD110630363609_Police_Involved_Shooting_Update2.asp		Yes	2	I've already requested to receive updates.				2011-06-30	1	No, I have an incident/more incidents to log.
FLMiamiDade	2014-08-28 16:04:17	2011-06-30	FL - Florida	MiamiDade	Miami	Miami-Dade police	Roger Gonzalez Valdez	52	Male	White	Hispanic or Latino origin	Hispanic	2	Killed	Armed	Other Gun	Drug bust gone wrong. Was killed with 3 others.	http://www.miamidade.gov/police/releases/PD110630363609_Police_Involved_Shooting_Update2.asp		Yes	2	I've already requested to receive updates.				2011-06-30	1	No, I have an incident/more incidents to log.
CASanFrancisco	2014-08-25 22:28:57	2011-07-04	CA - California	SanFrancisco	San Francisco	BART police	Charles Blair Hill	45	Male	White	Not of Hispanic or Latino origin	White	3	Killed	Armed	Knife or cutting instrument	Crowell told investigators that Hill, who was wearing a tie-dyed shirt, was waving his arms around and spilling vodka from a Smirnoff bottle when they arrived. Crowell said he told Hill to “come back over here,” and Hill responded by tossing the bottle at the officers. It shattered on a metal sign. According to Crowell, Hill began approaching with a “pretty big” knife "with a 3- or 4-inch blade."…	http://www.bart.gov/news/articles/2011/news20110704a	James Crowell	Yes	2	I've already requested to receive updates.				2011-07-03	1	No, I have another incident to log.
PADelaware	2014-08-25 22:55:10	2011-07-04	PA - Pennsylvania	Delaware	Trainer	Philadelphia	Mark Richard Geisenheyner	51	Male	White	Not of Hispanic or Latino origin	White		Killed	Armed	Handgun	He was suspected of having just committed multiple murders. News articles say 5 SWAT teams surrounded the house where he had fled and he was killed in shootout.	http://www.nytimes.com/2011/07/05/nyregion/suspect-in-pa-shootings-is-killed-after-a-standoff.html?pagewanted=all&_r=0		Yes	5	I've already requested to receive updates.				2011-07-03	2	No, I have another incident to log.
NYKings	2014-08-31 15:51:27	2011-07-07	NY - New York	Kings	Brooklyn	New York Police Department	Pablo Negron	24	Male	Unknown	Hispanic or Latino origin	Hispanic	9	Hit	Armed	Handgun	Incident allegedly provoked by off-duty officer Albert Lloyd made pass at Negron's girlfriend, which she rebuffed. Negron and Lloyd exchanged words, with the officer referring to Negron in racialized terms as a "rabbit chinchilla". Later outside of bar altercation occurred between Negron's friend and off-duty partner of Lloyd, officer Reynolds. According to police Negron placed Lloyd in headlock,…	http://www.nydailynews.com/news/crime/man-shot-off-duty-brawl-brooklyn-old-gallery-bar-apparent-fight-woman-article-1.160828	Jason Reynolds	Yes	2	No thanks.				2011-07-07	1	This is the first incident I am logging.
LAOrleansParish	2014-08-23 16:05:00	2011-07-10	LA - Louisiana	OrleansParish	New Orleans	New Orleans Police Department	Justin Schaubert	25	Male	White	Unknown	White		Killed	Armed	Handgun	Dead man was asked to leave Bourbon Street club because he wasn't wearing a shirt. He became upset, took out a gun, and started firing at the bouncers. Police responded, he shot at them, and they shot him dead. Additional info: http://www.katc.com/news/relatives-speak-out-about-police-shooting-death-in-new-orleans/	http://www.nola.com/crime/index.ssf/2011/07/nopd_fatally_shoots_man_on_bou.html		Yes	5	I've already requested to receive updates.
MOJackson	2014-09-16 20:24:39	2011-07-11	MO - Missouri	Jackson	Kansas City	Kansas City Police Department	Jessica Zeto	34	Female	White	Not of Hispanic or Latino origin	White		Killed	Armed	Rifle	Victim Jessica Zeto, a recovering addict, had visited her childhood friend Billie Roland's house because she was upset about her boyfriend having drugs in her house. Zeto crashed her van behind the house and threatened a women inside (Roland's son's girlfriend) with an assault rifle, ordering her to get out. The young woman then called police from a neighbor. When police arrived, Zeto emerged fro…	http://www.kctv5.com/story/15063590/daughter-of-woman-killed-by-police-reveals-panic-preceding-shooting		Yes	4	Add me!	Jon Friestedt	jfrieste@gmail.com	@jonnyfiercestedt	2011-07-11	1	This is the first incident I am logging.
CALosAngeles	2014-08-26 02:40:57	2011-07-13	CA - California	LosAngeles	Huntington Park	Huntington Park Police	Nahun Garcia	23	Male	Unknown	Hispanic or Latino origin	Hispanic		Killed	Armed	Other Gun		http://homicide.latimes.com/post/nahun-garcia/		Yes		No thanks.				2011-07-13	1	This is the first incident I am logging.
NVClark	2014-10-08 11:59:50	2011-07-14	NV - Nevada	Clark	Las Vegas Valley	Metro Police	Rafael Alonso Olivas	23	Male	Unknown	Hispanic or Latino origin	Hispanic	1	Killed	Armed	Knife or cutting instrument	Three Metro Police officers fatally shot a 23-year-old man wielding a butcher knife Thursday morning in a western Las Vegas Valley neighborhood. Police responded at 6:46 a.m. to the report of a domestic disturbance on Musical Lane near the intersection of Firestone Drive and Westcliff Drive. That location is southwest of the Buffalo Drive and Summerlin Parkway interchange. Metro Police Capt. Patr…	http://www.lasvegassun.com/news/2011/jul/14/metro-police-involved-shooting-western-valley/		Yes	2	No thanks.				2011-07-14	1	This is the first incident I am logging.
CASanFrancisco	2014-08-20 12:59:41	2011-07-16	CA - California	SanFrancisco	San Francisco	San Francisco Police Department	Kenneth Wade Harding	19	Male	Black or African American	Not of Hispanic or Latino origin	Black		Killed	Armed	Handgun	Was being detained for fare evasion at Bayview train platform when he ran from officers and allegedly pulled out a handgun and fired at the police as he was being chased. Before the crime scene was locked down someone stole the victim's weapon, it was recovered shortly afterwards due to witnesses identifying the person who took the gun. Two articles describe this incident: Victim's name and backg…	http://sanfrancisco.cbslocal.com/2011/07/18/suspect-shot-dead-by-sf-police-was-convicted-child-rapist/
CALosAngeles	2014-08-20 12:52:30	2011-07-18	CA - California	LosAngeles	Los Angeles	Los Angeles Police Department			Male	White	Hispanic or Latino origin	Hispanic		Killed	Armed	Firearm; not stated	Man outside his home pointing gun at his family, killed by police.	http://latimesblogs.latimes.com/lanow/2011/07/pacoima-fatal-officer-involved-shooting.html
LARapidesParish	2014-08-24 22:20:36	2011-07-20	LA - Louisiana	RapidesParish	Alexandria	Alexandria Police	Shel Randal Bohannon	42	Male	White	Not of Hispanic or Latino origin	White		Hit	Armed	Shotgun	Man walking down the street with a shotgun. Cops tell him to drop it. He fires a shot in the air. One of the cops shoots him in the leg.	http://www.youpostthenews.com/newsArticle.php?aid=273		Yes	5	I've already requested to receive updates.
NYAlbany	2014-10-11 14:22:03	2011-07-21	NY - New York	Albany	Colonie	Colonie Police Department	Agostino V. Jubrey	21	Male	White	Unknown	White		Killed	Armed	Handgun	Office Belles responded to a domestic shooting and when he arrived Jubrey came out firing. They exchanged 13 shots and Jubrey died days later of a gunshot wound to the head.	http://www.timesunion.com/local/article/New-details-emerge-from-gunbattle-1524644.php	David Belles	Yes	5	I've already requested to receive updates.				2011-07-20	1	No, I have an incident/more incidents to log.
VAFairfax	2014-10-11 14:30:18	2011-07-21	VA - Virginia	Fairfax	Centreville	Fairfax County Police Department	Ricardo Leon	34	Male	White	Hispanic or Latino origin	Hispanic		Killed	Armed	Shotgun	Officers responded to a domestic call and when Leon wouldn't drop his shotgun, he was killed.	http://www.washingtonpost.com/blogs/crime-scene/post/fairfax-county-officers-cleared-in-fatal-shooting/2011/08/30/gIQAqp9dqJ_blog.html	Jonathan Keitz, Stephen Sykes	Yes	4	I've already requested to receive updates.				2011-07-21	2	No, I have an incident/more incidents to log.
WAKing	2014-10-11 14:10:30	2011-07-21	WA - Washington	King	Federal Way	Federal Way Police Department	Jedidiah Waters	29	Male	White	Unknown	White	11	Hit	Armed	Handgun	Police were called on Waters suspected of shoplifting. Waters fled and when he allegedly reached for a gun on his ankle, Leitgeb fired 11 shots and killed Waters.	http://www.federalwaymirror.com/news/143504186.html	Matthew Leitgeb	Yes	3	I've already requested to receive updates.				2011-07-21	1	No, I have an incident/more incidents to log.
COAdams	2014-08-26 16:43:11	2011-07-23	CO - Colorado	Adams	Aurora	Aurora Police	Juan Contreras	59	Male	Unknown	Hispanic or Latino origin	Hispanic	3	Killed	Armed	Knife or cutting instrument	Officer Randall Carroll was trying to arrest Contreras for demanding $100 to return a set of car keys a woman had lost earlier, and Contreras had a knife.	http://en.wikipedia.org/wiki/Death_of_Kelly_Thomas	Officer Randall Carroll	Yes		I've already requested to receive updates.				2011-07-05	1	No, I have another incident to log.
OHCuyahoga	2014-11-03 23:07:26	2011-07-29	OH - Ohio	Cuyahoga	Cleveland		Iluminado Lopez	44	Male	White	Hispanic or Latino origin	Hispanic		Killed	Armed	Knife or cutting instrument	Dispatch confirmed that the shooting happened in the 3100 block of West 52nd Street, near Kouba Avenue. The call came over the scanners around 8:30 p.m. According to witnesses, police were called to the scene because of damage to a car and discovered Lopez sitting in the street. Witnesses said Lopez didn't comply with police and eventually pulled a machete from his pants.	http://www.newsnet5.com/news/local-news/cleveland-metro/police-involved-shooting-on-clevelands-west-side		Yes	5	I've already requested to receive updates.				2011-07-29	1	No, I have an incident/more incidents to log.
UTSevier	2014-08-26 08:35:34	2011-07-29	UT - Utah	Sevier	Salina	Salina Police Department	Jeffrey J. Sorensen	43	Male	White	Unknown	White	1	Killed	Unarmed	Unarmed	When Madsen attempted to arrest Sorenson for DUI, Sorensen attacked Madsen with brutal force, knocking him to the ground. The report said Sorenson continued his aggressiveness towards Madsen, at which time Madsen shot Sorenson, fatally wounding the man.	http://www.richfieldreaper.com/news/local/article_f0f77654-bd3e-11e0-bfee-001cc4c002e0.html	Cory Madsen	Yes	1	I've already requested to receive updates.				2011-07-29	1	No, I have another incident to log.
CALosAngeles	2014-08-26 14:36:30	2011-07-30	CA - California	LosAngeles	Los Angeles	Los Angeles Police Department	Christopher Moreno	38	Male	White	Hispanic or Latino origin	Hispanic		Killed	Armed	Knife or cutting instrument	Moreno escaped from an ambulance from jail and while officers searched, Moreno jumped one of them and stabbed him through the left bicep with an 8-inch butcher knife, according to LAPD Cmdr. Andrew Smith. At least one of the officers fired multiple shots at Moreno, killing him, Smith said.	http://homicide.latimes.com/post/christopher-moreno/		Yes	4	I've already requested to receive updates.				2011-07-30	1	This is the first incident I am logging.
NJHudson	2014-08-25 15:32:31	2011-07-31	NJ - New Jersey	Hudson	Jersey City	Jersey City Police Department	Deron Andre' Jerome Kittrell	28	Male	Black or African American	Unknown	Black		Killed	Armed	Handgun	Mecka responded to a 911 call for shots fired, chased Kittrell who pointed his gun at Mecka. Mecka shot and killed Kittrell. Kittrell was found to be intoxicated and his gun empty of bullets but had been fired recently.	http://www.nj.com/jjournal-news/index.ssf/2011/08/family_of_man_slain_by_jersey.html	Louis Mecka	Yes	5	I've already requested to receive updates.				2011-07-31	1
PAPhiladelphia	2014-11-17 17:17:31	2011-07-31	PA - Pennsylvania	Philadelphia	Philadelphia	Philadelphia Police	Trey Nelson	19	Male	Black or African American	Unknown	Black	1	Hit	Armed	Handgun	Young man shot co worker in selling kitchen appliances grazing a three year old in the head. Police were on the scene when Nelson began to open fire on them immediately. The Police responded to the shots and began shooting from their vehicle where the shot the victim	http://www.nbcphiladelphia.com/news/local/Police-Shoot-Suspect-in-North-Philly-209343861.html		Yes	5	No thanks.				2013-05-30	2	This is the first incident I am logging.
INMonroe	2014-08-26 10:42:01	2011-08-01	IN - Indiana	Monroe	Bloomington	Bloomington Police Department	Richard W. North	50	Male	White	Unknown	White		Killed	Armed	Handgun	Officers found North holding his wife in a headlock with a gun pointed at her head. A hostage negotiator attempted to talk with North but north allegedly continued to point a gun at his wife and at officers and was fatally shot.	http://www.wthr.com/story/15189715/man-shot-killed-after-bloomington-hostage-situation		Yes	5	I've already requested to receive updates.				2011-08-01	1	No, I have another incident to log.
TXGregg	2014-08-25 15:19:11	2011-08-01	TX - Texas	Gregg	Kilgore	Kilgore Police Department	Jamal Joseph Freeman	19	Male	Black or African American	Unknown	Black		Killed	Armed	Knife or cutting instrument	Police responded to a 911 call reporting a kidnapping. As officers were leaving finding no kidnapping Freeman stabbed them with a knife. Unable to taser Freeman, one of the officers shot and killed Freeman. Freeman's family cited his mental illness as a factor.	http://www.12newsnow.com/story/15186168/two-kilgore-police-officers-assaulted	DeAnn Brown, David Tucker	Yes	3	I've already requested to receive updates.				2011-08-01	1
ARBenton	2014-08-26 07:16:05	2011-08-02	AR - Arkansas	Benton	Rogers	Rogers Police Department	Fallon Rae (Blanchette) Frederick	30	Female	White	Unknown	White	3	Killed	Armed	Knife or cutting instrument	Frederick called 911 inside a store and told police she was being followed. Police showed up and Frederick, armed with a 4 inch knife, told them she was a paranoid schizophrenic. One stun gun shot was blocked and when Frederick moved toward an officer, Motsinger fired 3 shots into the 98 lb Frederick fatally wounding her.	http://www.nwaonline.com/news/2011/aug/06/officer-cleared-shooting/?print	Vence Motsinger	Yes	1	I've already requested to receive updates.				2011-08-02	1	No, I have another incident to log.
KYBreathitt	2014-08-26 07:31:45	2011-08-02	KY - Kentucky	Breathitt	Jackson	Kentucky State Police	Earl Joseph Prater	42	Male	White	Unknown	White	2	Killed	Armed	Knife or cutting instrument	Hollon responded to a call for a stolen vehicle and encountered Prater in his yard. Prater wouldn't drop an axe as he approached Hollon and Hollon shot him twice, killing Prater.	http://www.kentuckystatepolice.org/posts/press/2011/post13_pr08_02_11.htm	Chris Hollon	Yes	2	I've already requested to receive updates.				2011-08-02	1	No, I have another incident to log.
MNWashington	2014-08-26 10:52:45	2011-08-02	MN - Minnesota	Washington	St. Paul Park	St. Paul Park Police Department, Washington County Special Response Team	Nathan Adam Kluessendorf	22	Male	White	Unknown	White		Hit	Armed	Rifle	Police responded to a report of a suicidal male. Officers found Kluessendorf armed, and a standoff ensued. He fired 40 or more rounds at officers from a shotgun and a rifle, prosecutors said. The standoff ended after about five hours when a sniper from the Washington County Special Response Team shot Kluessendorf.	http://www.twincities.com/news/ci_18612636		Yes	5	I've already requested to receive updates.				2011-08-02	4	No, I have another incident to log.
TXHarris	2014-08-26 11:38:08	2011-08-02	TX - Texas	Harris	Houston	Metropolitan Transit Authority	Nolton Joseph LaFleur III	29	Male	Black or African American	Unknown	Black		Killed	Unarmed	Unarmed	Hernandez claims LaFleur ran a red light. Hernandez stopped him at a resident's gate, where he claims LaFleur refused commands to get out of the car and instead put the car in reverse, ending up in a ditch. Hernandez further claims LaFleur made a furtive move for a gun in the car, so he shot him. Witnesses say he was trying to put the car in park, and "they just started shooting."	http://abc13.com/archive/8284831/	Richard Hernandez	Yes	2	I've already requested to receive updates.				2011-08-02	1	No, I have another incident to log.
ILCook	2014-08-26 11:26:00	2011-08-03	IL - Illinois	Cook	Chicago	Chicago Police Department	Claude A. Ellis, Jr.	35	Male	Black or African American	Unknown	Black		Killed	Unarmed	Unarmed	Police responded to a 911 call for a knife threat. Ellis allegedly was in bed when officers tried to arrest him. A struggle followed, Ellis was maced but Dolan fired one shot into Ellis chest killing him. No knife was found.	https://www.google.com/url?sa=t&rct=j&q=&esrc=s&source=web&cd=2&cad=rja&uact=8&ved=0CCgQFjAB&url=http%3A%2F%2Fil.findacase.com%2Fresearch%2FwfrmDocViewer.aspx%2Fxq%2Ffac.20130207_0000345.NIL.htm%2Fqx&ei=4p_8U_LcBcbaoASe4oKACg&usg=AFQjCNGntB3dPHSO0zMDS4POxupCVTna5g&sig2=8SDPg9pJtdlGUkEiz2tidg&bvm=bv.74035653,d.cGU	Robert Dolan, Margaret Sallustio	Yes	3	I've already requested to receive updates.				2011-08-03	1	This is the first incident I am logging.
SCBamberg	2014-08-26 13:11:53	2011-08-04	SC - South Carolina	Bamberg	Denmark	Bamberg County Police Department, Denmark Police Department	Warren Robinson	50	Male	Black or African American	Unknown	Black		Killed	Unarmed	Unarmed	Minister Robinson was pulled over based on a tip he had drugs in his truck. When he fled, both officers fired at the truck, Brunson's two shots killed Robinson. A search later showed no drugs on Robinson or in the truck.	http://www.wistv.com/story/25670856/doj-clears-two-sc-cops-in-2011-deadly-shooting?page=full&N=F	Horace Brunson, Eddie Williams	Yes	1	I've already requested to receive updates.				2011-08-04	2	No, I have another incident to log.
PADelaware	2014-08-28 08:34:42	2011-08-05	PA - Pennsylvania	Delaware	Chester	Chester Police Department	Daniel Francis Simms	21	Male	Black or African American	Unknown	Black		Killed	Armed	Handgun	Chester Police were on the lookout for Simms who reportedly was carrying a stolen gun. After a foot chase Simms was shot in the back. Police allegedly found a fully loaded handgun near Simms.	http://www.delcotimes.com/general-news/20111222/chester-cop-cleared-in-summers-fatal-shooting		Yes	3	I've already requested to receive updates.				2011-08-05	10	This is the first incident I am logging.
UTSaltLake	2014-08-26 14:29:54	2011-08-05	UT - Utah	SaltLake	Salt Lake City	Utah Highway Patrol	Josue Ismael Ramirez-Perez	19	Male	White	Hispanic or Latino origin	Hispanic	33	Killed	Armed	Handgun	A Utah Highway Patrol trooper shot and killed Josue Ismael Ramirez-Perez, 19, inside a vehicle on the 700 North I-215 off-ramp after the man fired several shots at the officer. The two became involved in a shootout from close range.	http://www.deseretnews.com/article/705390049/Trooper-cleared-praised-in-fatal-freeway-shootout.html?pg=all	Aaron Colvin	Yes	5	I've already requested to receive updates.				2011-08-05	1	This is the first incident I am logging.
CARiverside	2014-08-26 15:17:23	2011-08-06	CA - California	Riverside	Riverside	Riverside Police Department	Gerardo Rodriguez	39	Male	White	Hispanic or Latino origin	Hispanic		Hit	Unarmed	Unarmed	“When the officers arrived, they made contact with an adult male at the front door and the subject refused to cooperate with officers. This confrontation with the subject led to an officer-involved shooting involving one of the officers.”	http://www.examiner.com/article/riverside-police-early-morning-shooting		Yes	1	I've already requested to receive updates.				2011-08-06	2	This is the first incident I am logging.
CODenver	2014-08-27 14:45:47	2011-08-06	CO - Colorado	Denver	Denver	Denver Police Department	David Jerome Maestas	33	Male	Unknown	Hispanic or Latino origin	Hispanic		Killed	Armed	Firearm; not stated	Photo of victim: http://media.thedenverchannel.com/photo/2012/08/15/David-Maestas-28815135_26197_ver1.0_640_480.jpg Victim also attempted to run over police officers with vehicle before aiming gun at an officer. Officer Robert Warren also fired at the victim. Source for victim's age: http://www.thedenverchannel.com/news/robber-killed-by-cops-was-long-time-criminal	https://denvergov.org/Portals/744/documents/statements/Public_Statement_OIS_Maestas_2-13-12.pdf	David Ryan	Yes	5	Add me!	Aaron McDavid	aaron.mcdavid@gmail.com		2011-08-06	1	This is the first incident I am logging.
CASanDiego	2014-08-27 17:10:05	2011-08-07	CA - California	SanDiego	San Diego	San Diego Police Department	Dejon Marquee White	23	Male	Black or African American	Not of Hispanic or Latino origin	Black	20	Killed	Armed	Shotgun	Photo of deceased: http://media.nbcsandiego.com/images/485*273/Dejon-White-Facebook-547.jpg Additonal News: http://www.nbcsandiego.com/news/local/Cop-Shooting-Suspect-Had-Criminal-Past-127226128.html Tough to find data about the death. Deceased killed a police officer earlier in the day, and most news stories focus on that.	http://ftpcontent.worldnow.com/kfmb/misc/white_autopsy.pdf		Yes	5	I've already requested to receive updates.				2011-08-06	2	This is the first incident I am logging.
OHSummit	2014-08-27 10:21:55	2011-08-07	OH - Ohio	Summit	Copley Township	Copley Township Police Department	Michael E. Hance	51	Male	White	Unknown	White		Killed	Armed	Handgun	Officer Ben Campbell killed 51-year-old Michael Hance after Hance went on a shooting spree that left seven people dead and wounded another.	http://murderpedia.org/male.H/h/hance-michael.htm	Ben Campbell	Yes	5	I've already requested to receive updates.				2011-08-07	10	No, I have another incident to log.
WAKing	2014-08-27 09:50:09	2011-08-10	WA - Washington	King	Shoreline	King County Sheriff's Office	David Gary Albrecht	22	Male	White	Unknown	White		Killed	Armed	chef's knife and a shotgun	Police responding to Albrecht’s home say they found a bloodied woman who told them her boyfriend was inside and was suicidal. Police say the 22-year old man emerged from the home armed with a shotgun and a knife, and did not respond to commands to drop the gun.	http://patch.com/washington/shoreline/inquest-ordered-into-fatal-police-shooting-of-shoreli09f4062c81		Yes	3	I've already requested to receive updates.				2011-08-10	1	This is the first incident I am logging.
OHFranklin	2014-08-27 10:49:30	2011-08-11	OH - Ohio	Franklin	Columbus	Columbus Police Department	Juvon L. Williams	18	Male	Black or African American	Unknown	Black	40	Killed	Armed	Handgun	Williams killed Leigh Belyn, his girlfriend, then drove around until police stopped him. Williams fired at police and they returned fire, killing him.	http://www.dispatch.com/content/stories/local/2011/08/13/young-love-turned-deadly.html		Yes	4	I've already requested to receive updates.				2011-08-11	1	No, I have another incident to log.
FLMiamiDade	2014-08-27 12:39:56	2011-08-12	FL - Florida	MiamiDade	Miami	Miami Dade Police Department	Catawaba Tequila Howard	32	Female	Black or African American	Unknown	Black		Killed	Armed	Handgun	Police responded to Howard after she was reported to have been making threats to herself and others. After Howard fired on officers, she was fatally wounded. Howard was an Air Force veteran who was mistakenly discharged from the VA.	http://miami.cbslocal.com/2011/08/12/woman-killed-officer-saved-by-vest-in-police-involved-shooting/	William Vasquez, Saul Rodriguez	Yes	5	I've already requested to receive updates.				2011-08-12	1	This is the first incident I am logging.
MDPrinceGeorge's	2014-08-27 13:55:27	2011-08-12	MD - Maryland	PrinceGeorge's	Clinton	Pentagon Force Protection Agency	Ronald Delonte Royal	20	Male	Black or African American	Unknown	Black		Killed	Armed	Handgun	Off duty Officer Thomas encountered a fight and when he identified himself as an officer, Royal allegedly pointed a gun at him. Thomas shot and killed Royal.	http://www.wjla.com/articles/2011/08/one-killed-in-prince-george-s-county-65065.html	Alex Thomas	Yes	5	I've already requested to receive updates.				2011-08-12	1	No, I have an incident/more incidents to log.
NYSchenectady	2014-08-27 14:15:30	2011-08-12	NY - New York	Schenectady	Schenectady	Schenectady Police Department	Luis R. Rivera	32	Male	White	Hispanic or Latino origin	Hispanic	14	Killed	Unarmed	Unarmed	Police responded to reports of a man with a gun. The dash cam video shows Rivera having a brief struggle with officers before taking off out of the view of the camera. Police say, at that point, Rivera reached for his gun, causing officers to shoot at him, firing 14 shots toward him in just over 4 seconds. Rivera was shot once in the back and once in the back of the leg. At some point during the …	http://www.timesunion.com/local/article/Video-relays-deadly-day-4375146.php	William Fennell, Kevin Rayball and Michael Wood	Yes	2	I've already requested to receive updates.				2011-02-12	1	No, I have an incident/more incidents to log.
FLMiamiDade	2014-08-28 08:51:43	2011-08-14	FL - Florida	MiamiDade	Miami	Miami Dade Police Department	Cola James Johnson III	42	Male	White	Unknown	White		Hit	Unarmed	Unarmed	When Officer Anthony Green approached a reported stolen vehicle, the man behind the wheel, Cola James Johnson III, allegedly hit the gas and steered toward the cop. Taking defensive action, police said Green fired on Johnson; no word on how many times he was hit.	http://www.miamidade.gov/police/releases/PD110814327415_Police_Involved_Shooting.asp	Anthony Green	Yes	3	I've already requested to receive updates.				2011-08-14	1	This is the first incident I am logging.
CAOrange	2014-08-28 09:30:55	2011-08-16	CA - California	Orange	Anaheim	Anaheim Police Department	David Raya	23	Male	White	Hispanic or Latino origin	Hispanic	5	Killed	Unarmed	Unarmed	Police were searching for Raya a wanted parolee and found him jumping out a window. Linn claims Raya was reaching in his waistband and fired 5 shots at Raya. 3 hit him in the back and he died. This is Linn's 5th officer involved shooting case. Source - http://goo.gl/9oxWea	https://www.google.com/url?sa=t&rct=j&q=&esrc=s&source=web&cd=3&cad=rja&uact=8&ved=0CC4QFjAC&url=http%3A%2F%2Fwww.orangecountyda.com%2Fdocs%2Fdavid_raya_ois_investigation_letter.pdf&ei=ISv_U8flEcfPggS0iYLQAw&usg=AFQjCNHtf8bnvgG4iL9ZBniipnwpldtJFw&bvm=bv.74035653,d.eXY	Bruce Linn	Yes	2	I've already requested to receive updates.				2011-08-16	2	This is the first incident I am logging.
FLHillsborough	2014-08-28 09:45:34	2011-08-16	FL - Florida	Hillsborough	Plant City	Plant City Police Deptarment	Jacob Munt	25	Male	White	Unknown	White		Hit	Unarmed	Unarmed	Munt was on the run after a home burglary and when he rammed two police cars he was shot. Munt survived.	http://www.abcactionnews.com/news/region-east-hillsborough/plant-city/police-officer-involved-in-plant-city-shooting	John Stasiak, Steve Carmack	Yes	2	I've already requested to receive updates.				2011-08-16	3	No, I have an incident/more incidents to log.
ILCook	2014-10-16 12:56:59	2011-08-19	IL - Illinois	Cook	Chicago	Glenwood Police	Mateo Meza-Cortez	39	Male	Unknown	Hispanic or Latino origin	Hispanic	3	Killed	Armed	Vehicle		http://chicago.cbslocal.com/2011/08/19/harvey-man-shot-and-killed-by-cop-he-tried-to-run-over/		Yes	4	No thanks.				2011-08-19	1	This is the first incident I am logging.
TXHarris	2014-08-28 11:08:26	2011-08-19	TX - Texas	Harris	Houston	Harris County Sheriff's Office	Scott Alan Webb	40	Male	White	Unknown	White		Hit	Unarmed	Unarmed	Truck was chased after reports it was involved in a robbery, after striking several police vehicles, Boone the driver was shot dead. Webb was the passenger and survived. According to reports Webb was not armed.	http://www.chron.com/news/houston-texas/article/Robbery-suspect-fatally-shot-by-deputy-had-2136568.php	M. Murphy	Yes	2	I've already requested to receive updates.				2011-08-19	1	No, I have an incident/more incidents to log.
OHHamilton	2014-08-29 08:15:15	2011-08-20	OH - Ohio	Hamilton	Cincinnati	Cincinnati Police Department	Davon L. Mullins	16	Male	Black or African American	Unknown	Black	2	Killed	Armed	Handgun	Officer Cyranek searched Mullins on a tip he was leaving an event where kids had guns. Mullins resisted the search and in the scuffle pulled his gun, Cyranek fired twice at Mullins who was on the ground, killing him.	http://www.wcpo.com/news/local-news/federal-judge-dismisses-civil-suit-against-cincinnati-pd-over-teens-2011-shooting-death-	Oscar Cyranek	Yes	3	I've already requested to receive updates.				2011-08-20	10	No, I have an incident/more incidents to log.
CAContraCosta	2014-08-20 15:01:58	2011-08-24	CA - California	ContraCosta	Pinole	Pinole Police Department	Pierre Daniel	25	Male	White	Not of Hispanic or Latino origin	White		Killed	Armed	Handgun	An armed car robbery perpetuated by Pierre and his brother who was injured turned into a gunfight involving a Wells Fargo guard and two police officers	http://www.mercurynews.com/ci_18747387
NYTompkins	2014-08-29 09:13:56	2011-08-26	NY - New York	Tompkins	Ithaca	Ithaca Police Department	Keith Thomas Shumway	20	Male	White	Unknown	White		Killed	Armed	Handgun	Police claim Shumway reached around an unnamed office sitting in his car and in a scuffle shot the officer in the leg with his own gun. Officer Goldsberry claims Shumway wouldn't drop the gun and he was fatally shot 'several' times. Shumway suffered from mental illness.	http://www.buzzsawmag.org/2011/12/07/keith-shumway-a-wrongful-death/	Brandon Goldsberry	Yes	3	I've already requested to receive updates.				2011-08-25	1	No, I have an incident/more incidents to log.
OHFranklin	2014-08-29 09:53:40	2011-08-27	OH - Ohio	Franklin	Columbus	Columbus Police Department	Obbie Lee Shepard, Jr.	21	Male	Black or African American	Unknown	Black		Killed	Armed	Handgun	The officers chased Shepard, 21, on foot after responding to a report of a stolen bicycle. Valiski told police investigators that he shot Shepard after Shepard reached into his waistband during the chase. Valiski told investigators. “I believed that the suspect was armed and that he was going to fire his gun at me.” Worthington, who did not shoot, said Shepard turned and fired two shots as he ran…	http://www.dispatch.com/content/stories/local/2014/03/20/lawsuit-involving-officers-dismissed.html	Joseph Valiski, Donald Worthington	Yes	3	I've already requested to receive updates.				2011-08-26	1	No, I have an incident/more incidents to log.
CALosAngeles	2014-08-29 11:20:57	2011-08-30	CA - California	LosAngeles	Long Beach	Long Beach Police Department	Ismael Lopez	29	Male	White	Hispanic or Latino origin	Hispanic		Killed	Unarmed	Unarmed	Lopez was unarmed, partially paralyzed and walking with a limp, shot to death by an LBPD officer who claimed he was running from the scene of a gang fight.	http://latimesblogs.latimes.com/lanow/2011/09/activists-long-beach-police-killings.html		Yes	1	I've already requested to receive updates.				2011-08-26	1	No, I have an incident/more incidents to log.
FLMiamiDade	2014-08-21 12:06:36	2011-08-31	FL - Florida	MiamiDade	Miami Beach	North Miami Beach Police Department	Ernest Vassell	56	Male	Black or African American	Unknown	Black		Killed	Armed	Toy/fake/non-lethal gun	Autistic man with toy gun was shot (possibly multiple times) by an unidentified officer. Flown to hospital, later died.	http://miami.cbslocal.com/2011/08/31/n-miami-beach-police-officers-shot-rifle-wielding-man/		Yes
TNKnox	2014-08-21 12:14:50	2011-09-01	TN - Tennessee	Knox	Knoxville	Knoxville Police Department	Jason Albert Pannell	28	Male	Black or African American	Unknown	Black		Killed	Armed	Handgun	Pannell fired shots at Inspector Clemons and Officer Kalmanek. Officers returned fire, Pannell died at scene.	http://www.knoxnews.com/news/local-news/knoxville-police-kill-man-in-shoot-out	Lynn Clemons and Jason Kalmanek	Yes
OHCuyahoga	2014-08-21 16:44:22	2011-09-06	OH - Ohio	Cuyahoga	Cleveland	Cleveland PD	Donnie Rodgers	39	Male	White	Not of Hispanic or Latino origin	White		Hit	Armed	Handgun	Police say 39-year-old Donnie Rodgers shot his girlfriend, Shirley Price, in the neck. The officers forced to open fire to defuse the domestic situation.	http://www.wtoc.com/story/15405985/cleveland-police-investigate-double-shooting-on-citys-west-side		Yes	5
GAMuscogee	2014-08-28 21:13:19	2011-09-07	GA - Georgia	Muscogee	Columbus	Columbus Police	Tony Carr	35	Male	Black or African American	Not of Hispanic or Latino origin	Black		Killed	Unarmed	Unarmed	According to Carr's family, he was car-jacked by a bank robber, Alrahiem Tolbert. Tolbert fired at police, who fired back at the speeding truck, hitting Carr in the passenger seat, thinking he was involved in the robbery. The truck then crashed, killing Tolbert as well.	http://www.ledger-enquirer.com/2011/09/07/1724480/officer-fires-into-truck-killing.html	Vincent Lockhart Jr.	Yes	2	No thanks.				2011-09-06	1	No, I have an incident/more incidents to log.
NYNewYork	2014-08-28 20:35:31	2011-09-07	NY - New York	NewYork	Manhattan	NYPD	John Collado	43	Male	White	Unknown	White	1	Killed	Unarmed	Personal weapon (hands, fists, feet, etc.)	"John Collado, 43, grabbed a narcotics officer who was arresting a man on Post Avenue, in Inwood, and began to choke the officer... The officer... managed to grab his gun and fire one found, striking Mr. Collado just below his sternum. Mr. Collado was taken to Harlem Hospital, where he died..." (There are several articles about this shooting.)	http://www.nytimes.com/2011/09/08/nyregion/man-shot-in-upper-manhattan-scuffle-with-officer-dies.html?_r=0		Yes	4	No thanks.				2011-09-06	1	No, I have an incident/more incidents to log.
ORJefferson	2014-08-28 21:25:35	2011-09-07	OR - Oregon	Jefferson	Warm Springs	Warm Springs tribal police	Vernon Leroy Middleton	22	Male	White	Not of Hispanic or Latino origin	White		Killed	Unarmed	Unarmed	FBI decided to file no charges in the March shooting of Middleton, who was shot by tribal police after a "confrontation" with police, not specified in this brief notice.	http://www.ktvz.com/news/No-Charges-in-Fatal-Warm-Springs-Police-Shooting/618706	Levi Dowty and John Webb	Yes	3	No thanks.				2011-03-20	3	No, I have an incident/more incidents to log.
CAMerced	2014-09-11 01:14:58	2011-09-08	CA - California	Merced	UC Merced	UC Merced Police	Daniel Pimentel	19	Male	White	Unknown	White	1	Hit	Unarmed	Unarmed	Daniel Pimentel is one of several young people who parked near Lake Yosemite in the early morning hours of July 24th. He says they were listening to music when a U.C. Merced Police officer started driving toward them. So Pimentel got into the back seat of one of the cars to leave. He says the driver was going less than ten miles per hour -- and was blinded by the bright lights on Officer Maria Bo…	http://theprodigy.ucmerced.edu/article/investigation-uc-merced-police-officer-shooting-continues	Maria Botwright-Soto	Yes	1	I've already requested to receive updates.				2011-07-24	1	No, I have an incident/more incidents to log.
NVClark	2014-08-20 16:05:24	2011-09-09	NV - Nevada	Clark	Las Vegas	Las Vegas Metropolitan PD	Marc Hull	25	Male	White	Unknown	White	44	Killed	Armed	Handgun	Hull was attempting to purchase electronics with fake credit card at a Wal-Mart. Officers were called and approached Hull & another suspect and were heading towards the loss prevention office at the store when Hull opened fire at Ramirez. A total of 44 shots were fired by four officers and Hull fired 9 shots at police.	http://www.reviewjournal.com/news/crime-courts/man-shot-killed-police-walmart-had-tattoo-depicting-assault-officer	Michael Ramirez, John Abel, Corey Staheli, Beaumont Hopson
VAHenrico	2014-08-20 16:56:27	2011-09-09	VA - Virginia	Henrico	Richmond	Henrico PD	Gregory McCracken	49	Male	White	Not of Hispanic or Latino origin	White		Killed	Armed	Handgun	Henrico Police responded in reference to a suicidal subject. Officers approached the residence and attempted to make contact with the male occupant without success. A short time later while officers were still on the scene, a taxi cab approached with the male subject, later identified as Gregory McCracken, 49, as a passenger. As officers approached the taxi, McCracken produced a small handgun and…	http://www.wect.com/story/15425242/officer-involved-in-west-end-shooting
SCYork	2014-08-29 12:48:16	2011-09-13	SC - South Carolina	York	York	York City Police, West Manchester Township Police	Larry Adams	41	Male	Black or African American	Unknown	Black		Killed	Armed	Handgun	Adams was on the run after an armed robbery. Police tracked him to a house and when Adams fired on officers, they returned fire.	http://www.wbtv.com/story/15459027/school-placed-on-lockdown-in-york-co-while-cops-search-for-suspect		Yes	5	I've already requested to receive updates.				2011-09-14	1	No, I have an incident/more incidents to log.
MIIngham	2014-09-03 07:51:59	2011-09-14	MI - Michigan	Ingham	Lansing	Lansing Police Department	John Richard Ferguson	50	Male	White	Unknown	White	1	Killed	Armed	Rifle	Officer Windom responded to a 911 domestic, Ferguson came outside with a loaded gun pointed at Windom. Windom fired once killing Ferguson.	http://www.mlive.com/lansing-news/index.ssf/2011/09/family_of_lansing_man_shot_kil.html	Billy Windom	Yes	5	I've already requested to receive updates.				2011-09-13	1	No, I have an incident/more incidents to log.
TXHarris	2014-09-03 08:04:43	2011-09-14	TX - Texas	Harris	Houston	Harris County Sheriff's Office	Lonnie Walker	23	Male	Black or African American	Unknown	Black		Hit	Unarmed	Unarmed	Walker was confronted by deputies as they robbing a restaurant. Walker’s companion was caught, but Walker fled. Claiming he refused orders to stop, Gustafson shot Walker from behind, hitting him in the leg.	http://www.chron.com/news/houston-texas/article/Deputy-wounds-armed-robbery-suspect-2169822.php	M. Gustafson	Yes	1	I've already requested to receive updates.				2011-09-14	2	No, I have an incident/more incidents to log.
CASantaClara	2014-09-03 08:49:33	2011-09-15	CA - California	SantaClara	San Jose	California Highway Patrol, San Jose Police Department	Filogonio Orozco	31	Male	White	Hispanic or Latino origin	Hispanic		Hit	Unarmed	Unknown	Orozco was seen entering a reported stolen car, when he fled and allegedly steered his car at officers, he was shot.	http://www.sfgate.com/bayarea/article/Car-theft-suspect-shot-by-cops-2309830.php		Yes	3	I've already requested to receive updates.				2011-09-16	1	No, I have an incident/more incidents to log.
NJOcean	2014-09-03 08:27:46	2011-09-15	NJ - New Jersey	Ocean	Tuckerton	Tuckerton Police Department	Steven H. Theoharides	35	Male	White	Unknown	White		Killed	Armed	Knife or cutting instrument	The officers were responding to a domestic violence call when they encountered Theoharides wielding a butcher knife. Neighbors said at the time they heard the police identify themselves and warn Theoharides before firing.	http://www.nj.com/news/index.ssf/2011/09/tuckerton_man_shot_by_police_r.html	Brian Olsen, Justin Cherry	Yes	3	I've already requested to receive updates.				2011-09-15	1	No, I have an incident/more incidents to log.
WAFranklin	2014-09-03 09:08:13	2011-09-16	WA - Washington	Franklin	Pasco	Pasco Police Department	Ezequiel Chavez	19	Male	White	Hispanic or Latino origin	Hispanic		Hit	Armed	Handgun	Police responded to a 911 call of suspicious people and when they tried to stop them Chavez fled and fired on police. Pettijohn returned fire, wounding Chavez.	http://www.tri-cityherald.com/2011/09/16/1643071/pasco-shooting-suspect-fired-first.html	Chad Pettijohn	Yes	5	I've already requested to receive updates.				2011-09-14	1	No, I have an incident/more incidents to log.
WYLaramie	2014-08-20 14:09:37	2011-09-19	WY - Wyoming	Laramie	Cheyenne	Cheyenne Police Department	Matthew Jacoby Carbajal	21	Male	Unknown	Hispanic or Latino origin	Hispanic	2	Hit	Unarmed	Shotgun	Matthew was driving with his significant other and infant child and pulled over for an apparent traffic violation. The officers claim he wouldn't put his hands out of the window and was cursing at them, that he then struck his girlfriend and pointed the car towards the officers with the car in park. At this time the officer fired two shotgun rounds striking him in the head and arm. He was treated…	http://wyomingnews.com/articles/2011/10/27/news/01top_10-27-11.txt#.U_TiQsVdU1I	Thornton
NYSuffolk	2014-09-03 10:04:40	2011-09-20	NY - New York	Suffolk	Selden	Suffolk County Police Department	Kevin John Callahan	26	Male	White	Unknown	White	3	Killed	Unarmed	Unarmed	Police responded to a 911 domestic call and as the police entered the room the door was suddenly closed trapping one of the officers in the room with his gun drawn. He feared that his gun would be taken and fired to stop someone “killing” him. The court records show that Wilson then fired at least two shots through the door, from the hallway. Kevin was shot in the chest and abdomen and then a thi…	http://www.nydailynews.com/new-york/long-island-mom-unarmed-son-shot-dead-sues-suffolk-county-police-department-article-1.1095985	Thomas Wilson	Yes	1	I've already requested to receive updates.				2011-09-20	1	No, I have an incident/more incidents to log.
NJMiddlesex	2014-09-03 12:41:30	2011-09-22	NJ - New Jersey	Middlesex	New Brunswick	New Brunswick Police Department	Barry "Gene" E. Deloatch, Sr.	46	Male	Black or African American	Unknown	Black	1	Killed	Unarmed	Unarmed	The officers were on routine patrol and stopped to question Deloatch and two other men, when Deloatch fled. Berdel followed him into an alley, where a struggle ensued and the officer fired a single fatal shot, the prosecutor's office said. Berdel later resigned after being found in violation of police procedures.	http://newbrunswicktoday.com/article/officer-who-shot-barry-deloatch-resigns-seeks-disability-pension	Brad Berdel, Daniel Mazan	Yes	1	I've already requested to receive updates.				2011-09-22	1	No, I have an incident/more incidents to log.
TXPotter	2014-09-03 12:54:54	2011-09-22	TX - Texas	Potter	Amarillo	Amarillo Police Department	Jerry Etheredge	56	Male	White	Unknown	White		Killed	Armed	Handgun	Etheredge's estranged wife called 911 when Etheredge began following her and her male friend. The two men were wrestling for the gun when Officer Kirk Anderson arrived, police said. Anderson ordered Etheredge to drop the weapon, but he refused, police said. The companion pushed away from Etheredge, who then rolled toward Anderson, police said. Police said Anderson fired at Etheredge several times…	http://amarillo.com/news/local-news/2011-09-22	Kirk Anderson	Yes	5	I've already requested to receive updates.				2011-09-21	1	No, I have an incident/more incidents to log.
WAKing	2014-08-22 03:11:11	2011-09-24	WA - Washington	King	Issaquah	Issaquah Police Department	Ronald W. Ficker	51	Male	White	Not of Hispanic or Latino origin	White	4	Killed	Armed	Rifle	Four officers fired simultaneously; outside a school.	http://www.issaquahpress.com/2011/09/24/gunman-dies-in-shootout-near-issaquah-high-school/,http://www.komonews.com/news/local/130501638.html,http://www.issaquahreporter.com/news/130748483.html,http://www.king5.com/story/local/2014/08/22/13020338/,http://seattletimes.com/html/localnews/2016310097_gunman25m.html		Yes
FLPinellas	2014-09-03 13:50:30	2011-09-26	FL - Florida	Pinellas	St. Petersburg	St. Petersburg Police Department	Jared Speakman	18	Male	White	Unknown	White	4	Killed	Armed	Handgun	Officers found 3 guys drinking down by the water, they noticed a gun in Speakman's waist. DeJesus struggled with Speakman and fatally wounded him.	http://www.baynews9.com/content/news/baynews9/news/article.html/content/news/articles/ot/both/2011/10/13/St_Pete_police_involved_shooting_ruled_justified.html	Ruben DeJesus	Yes	2	I've already requested to receive updates.				2011-09-26	2	No, I have an incident/more incidents to log.
CALosAngeles	2014-09-01 08:02:24	2011-09-30	CA - California	LosAngeles	Glendale	Glendale Police Department	Antonio Tafolla	35	Male	White	Hispanic or Latino origin	Hispanic		Killed	Armed	Handgun	Officers responded to a call of shots fired, once there they spotted a man, later identified as Tafolla, armed with a pistol. He fired at the officers, who returned fire.	http://homicide.latimes.com/post/antonio-tafolla/		Yes	5	I've already requested to receive updates.				2011-09-30	1	No, I have an incident/more incidents to log.
FLLee	2014-09-01 08:16:43	2011-09-30	FL - Florida	Lee	Lee	Fort Myers Police Department	Starling Javier	21	Male	White	Hispanic or Latino origin	Hispanic	8	Killed	Armed	Handgun	Officers responded to a call of shots fired. After a car and foot chase of Javier he fired at police. The two officers returned fire and killed Javier.	http://www.nbc-2.com/story/18146628/2012/05/04/officers-cleared-in-fatal-shooting	Erin Campbell, Christopher Scavo	Yes	5	I've already requested to receive updates.				2011-09-29	1	No, I have an incident/more incidents to log.
NJWarren	2014-09-01 07:31:04	2011-09-30	NJ - New Jersey	Warren	Mansfield Township	Mansfield Township Police Department	William P. Radler Jr.,	28	Male	White	Unknown	White	1	Hit	Armed	Knife or cutting instrument	Office Kirchner responded to a domestic call and when Radler moved toward him, Kirchner fired one shot into Radler's abdomen.	http://www.lehighvalleylive.com/warren-county/express-times/index.ssf/2011/09/william_p_radler_now_faces_cha.html	Patrick Kirchner	Yes	4	I've already requested to receive updates.				2011-09-22	1	No, I have an incident/more incidents to log.
CASacramento	2014-09-04 14:48:15	2011-10-01	CA - California	Sacramento		Sacramento SWAT Team	Aaron Bassler	35	Male	White	Unknown	White	7	Killed	Armed	Rifle	A man suspected in the fatal shootings of a Fort Bragg councilman and a county land trust official was shot and killed Saturday after an extensive manhunt in the redwood forests of Northern California, a sheriff’s deputy said.	http://www.nytimes.com/2011/10/02/us/manhunt-in-california-ends-as-murder-suspect-is-killed.html?_r=0		Yes	5	I've already requested to receive updates.				2011-10-01	2	No, I have an incident/more incidents to log.
ILWinnebago	2014-09-04 15:06:13	2011-10-02	IL - Illinois	Winnebago	Rockford	Winnebago County Sheriff’s Office	Michael D. Sago Jr.	16	Male	Black or African American	Unknown	Black	3	Killed	Unarmed	Unarmed	A group of 4 were attempting an armed robbery in a restaurant when an off duty Deputy Pobjecky got involved. There was a struggle over the gun and when Sago who was acting as the lookout attempted to leave the restaurant Pobjecky fatally shot him 3 times in the back.	http://www.rrstar.com/article/20130524/Blogs/305249895	Frank Pobjecky	Yes	1	I've already requested to receive updates.				2011-10-01	1	No, I have an incident/more incidents to log.
GAGlynn	2014-10-04 23:33:29	2011-10-03	GA - Georgia	Glynn	Brunswick	Glynn County police	Caroline McGehee Small	35	Female	White	Unknown	White	8	Killed	Armed	Vehicle	Original source from google search below, much better information gained here: http://members.jacksonville.com/news/crime/2011-10-02/story/troubling-details-georgia-police-shooting 540-page case file available from Georgia Bureau of Investigation It wasn't the first time Sasser had shot a suspect in the line of duty.	http://www.news4jax.com/news/New-Video-In-Caroline-Small-Shooting/3987324	Sgt. Corey Sasser, Officer Todd Simpson	Yes	1	I've already requested to receive updates.				2010-06-18	2	Yes, mark this date as completed.
NCPitt	2014-10-04 22:56:39	2011-10-03	NC - North Carolina	Pitt	Greenville	Greenville police	John Cecil Wainwright	36	Male	White	Unknown	White	3	Killed	Unarmed	Unarmed	Suspect just committed armed robbery of a drug store, and was apprehended, and then escaped from police and was shot as he was running back to his vehicle. cell phone video may exist of this incident.	http://www.reflector.com/crimerescue/man-shot-arlington-and-stantonsburg-450275	Cpl. Scott Johnson	Yes	2	I've already requested to receive updates.				2011-09-29	2	No, I have an incident/more incidents to log.
CALosAngeles	2014-10-05 00:38:21	2011-10-04	CA - California	LosAngeles	Glendale	Glendale police	Antonio Tafolla-Diaz	38	Male	White	Hispanic or Latino origin	Hispanic	8	Killed	Armed	Handgun	Man opens fire on police, he is then shot in the ensuing gun battle.	http://articles.glendalenewspress.com/2011-10-04/news/tn-gnp-1005-name_1_officer-involved-shooting-gun-battle-patrol-car		Yes	5	I've already requested to receive updates.				2011-09-30	1	No, I have an incident/more incidents to log.
KYBarren	2014-10-05 01:46:08	2011-10-04	KY - Kentucky	Barren		Kentucky State Police	Scotty Reece	41	Male	White	Not of Hispanic or Latino origin	White		Hit	Armed	Handgun	http://www.wbko.com/home/headlines/Wanted_Felon_Shot_By_KSP_Trooper_131154768.html	http://riling.rssing.com/chan-2125127/all_p26.html	Trooper Matt Cardwell	Yes	5	I've already requested to receive updates.				2011-10-05	8	No, I have an incident/more incidents to log.
MOGreene	2014-10-05 00:58:03	2011-10-04	MO - Missouri	Greene	Republic	Greene County sheriff	Tammy L. Robinette	46	Female	White	Not of Hispanic or Latino origin	White	5	Killed	Armed	Handgun	Deputy Matthew Keatts initiated a traffic stop at MM and Hwy 60 and when he reached inside to shut off the ignition of forty six year-old Tammy L. Robinette of Mountain Grove (AKA Tammy L. Campbell) he heard the click of a gun. The officer then fired his service revolver, killing the woman. dash camera may be available more information here: http://articles.kspr.com/2011-11-10/deadly-force_303850…	http://crimesceneinvestigations.blogspot.com/2011/10/officer-involved-shooting-near-republic.html	Matthew Keatts	Yes	5	I've already requested to receive updates.				2011-10-04	2	No, I have an incident/more incidents to log.
NJCumberland	2014-10-05 01:22:46	2011-10-04	NJ - New Jersey	Cumberland	Millville	Millville police	Barbara Elke Vanaman	37	Female	White	Not of Hispanic or Latino origin	White	2	Killed	Unarmed	Unarmed	Domestic violence. officer not on duty http://www.courierpostonline.com/story/news/crime/2014/05/24/ex-cop-in-sj-released-from-prison-served-5-years-for-killing-wife/9533001/	http://behindthebluewall.blogspot.com/2011/10/nj-despite-lies-cop-husband-who-killed.html	Robert E. Vanaman	Yes	1	I've already requested to receive updates.				2006-05-11	3	No, I have an incident/more incidents to log.
WIDane	2014-10-05 00:29:26	2011-10-04	WI - Wisconsin	Dane	Middleton	Middleton Police	Brandon S. Johnson	23	Male	White	Unknown	White	3	Hit	Armed	Shotgun	first link found in google search below: better information here: http://fitchburg.channel3000.com/news/news/59436-officials-id-man-shot-middleton-police and here: http://www.nbc15.com/morningshow/headlines/Middleton_Police_Shoot_Man_Armed_With_Weapon_131038773.html	http://www.youtube.com/watch?v=r6zY1D3AShY		Yes	5	I've already requested to receive updates.				2011-10-04	1	No, I have an incident/more incidents to log.
OHFranklin	2014-11-14 20:00:12	2011-10-05	OH - Ohio	Franklin	Columbus	Police -SWAT	Michael A. Lloyd	478	Male	Black or African American	Unknown	Black		Killed	Armed	Handgun	additional link, where racial information was located: http://www.columbuspolice.org/Media%20Releases/MediaReleaseArchives/Archivenew.html Suspect was followed and observed attempting armed robbery at local restaurant Donatos, after they were provided information from the ATF that the suspect may have been responsible for other similar crimes. Officers were unable to detain him before entering an…	http://www.dispatch.com/content/stories/local/2011/10/06/swat-officers-kill-robbery-suspect.html	Harry Vanfossan #983, Glenn Thivener #1357	Yes	4	Add me!	Amber Lauer	numb3rlady@gmail.com		2011-10-05	1	This is the first incident I am logging.
CASantaClara	2014-08-20 16:37:09	2011-10-10	CA - California	SantaClara	San Jose	San Jose PD	Ricardo Moreno	23	Male	White	Hispanic or Latino origin	Hispanic		Killed	Armed	Firearm; not stated	10/16/2012 search. "Moreno was apparently intoxicated on drugs when he shot up his brother’s car with a semiautomatic weapon and was waving his gun at passing motorists during the incident." Moreno pointed the gun at officers.	http://sanfrancisco.cbslocal.com/2012/10/16/san-jose-police-officer-cleared-in-fatal-shooting-ruled-self-defense/	Jeff Harwell
CALosAngeles	2014-08-21 21:00:48	2011-10-12	CA - California	LosAngeles	Downey	Downey Police Department	Manuel Tovar Vargas		Male	Unknown	Hispanic or Latino origin	Hispanic	3	Killed	Armed	Knife or cutting instrument	Victim was homeless, was holding a box cutter and a 28-inch long stick. Officers had difficulty communicating with him due to his accent. They approached him asking about the cause of a palm tree fire. He became agitated when they asked his name. Shooting was ruled self-defense.	http://www.thedowneypatriot.com/article/da-clears-police-officers-involved-in-fatal-shooting/	Leandra Weisenburger, Mathew Bassi	Yes	2
MTCarbon	2014-08-21 20:46:26	2011-10-13	MT - Montana	Carbon	Red Lodge	Red Lodge Police Department	Timothy Patrick	35	Male	White	Not of Hispanic or Latino origin	White		Killed	Armed	Firearm; not stated	Confusing circumstances. It was uncertain whether he died due to self-inflicted or officer-inflicted wounds. Autopsy concluded he died from self-inflicted wounds. Was found to have marijuana and methamphetamine in system.	http://billingsgazette.com/news/local/crime-and-courts/man-killed-in-shooting-involving-red-lodge-police-officer/article_c3eb6ae2-ee44-59db-8953-91b27c13acba.html	Scott Cope	Yes
PAPhiladelphia	2014-08-20 12:04:16	2011-10-15	PA - Pennsylvania	Philadelphia	Philadelphia	philadelphia police	Adolphus Pinkney	26	Male	Black or African American		Black		Killed	Armed	Handgun	Man fired at 2 officers outside a club early in the morning and they returned fire with "several" shots.	http://articles.philly.com/2011-10-15/news/30283686_1_desk-duty-evers-police-involved
CALosAngeles	2014-08-25 07:27:25	2011-10-16	CA - California	LosAngeles	Pomona	Pomona Police Department	Andres “Andy” Avila	26	Male	White	Hispanic or Latino origin	Hispanic	2	Killed	Unarmed	Unarmed	Avila and his girlfriend were sleeping in their car when police approached and woke them. Accounts vary on what happened next but two shots fired by unnamed police killed the unarmed Avila.	http://tsl.pomona.edu/articles/2011/11/11/news/721-mt.-sac-student-shot-by-police-questions-linger		Yes	1	I've already requested to receive updates.
NHHillsborough	2014-08-20 18:47:27	2011-10-22	NH - New Hampshire	Hillsborough	Pelham	NH State Police, Pelham NH Police, Lowell MA Police	Alberto Andres 'Beava' Pagan	21	Male	White	Hispanic or Latino origin	Hispanic	14	Killed	Armed	Handgun	Police called for a domestic assault, followed by a car chase from MA into NH. Stand off with police ended when Pagan pointed his gun at officers and was hit multiple times by 3 officers firing at him.	http://doj.nh.gov/media-center/press-releases/2011/documents/20111216-pelham-officer-involved-shooting.pdf	Gary Fisher, Dennis Moriarty, Chad Lavoie
WAGrant	2014-08-27 15:45:22	2011-10-24	WA - Washington	Grant	Royal City	Royal City Police	Pedro Salgado Ceja	45	Male	White	Hispanic or Latino origin	Hispanic	6	Killed	Armed	Blunt object (clubs, hammers, etc.)	Officer responded to domestic violence call, attempted to detain victim, who then confronted officer with a shovel. Officer unable to detain victim verbally or with non-lethal force, victim did not put down shovel, officer fired six shots, killing victim.	http://www.khq.com/story/15864955/officer-involved-shooting-in-royal-city	Officer Rey Rodriguez	Yes	3	Add me!	Brendan McCarty	brendanpmccarty@gmail.com	@brendanpmccarty	2011-10-25	1	No, I have an incident/more incidents to log.
CALosAngeles	2014-08-23 00:57:24	2011-10-27	CA - California	LosAngeles	Downey	Los Angeles County Sheriff's Department	Michael Nida	31	Male	Unknown	Hispanic or Latino origin	Hispanic	4	Killed	Unarmed	Unarmed	Nida was stopped by cops while getting cigarettes and gas on suspicion of having been involved in an armed robbery nearby. He ran from the cops and was shot 4 times for apparently turning towards the cops and acting aggressive.	http://assets.matchbin.com/sites/561/assets/9SRZ_2011_10_27.pdf		Yes	1	I've already requested to receive updates.
NCCumberland	2014-08-23 00:42:25	2011-10-27	NC - North Carolina	Cumberland	Fayetteville	Fayetteville Police	Gregory Townsend	45	Male	White	Not of Hispanic or Latino origin	White		Killed	Unarmed	Personal weapon (hands, fists, feet, etc.)	Townsend was stopped for a traffic violation. There was some form of fight, then he was shot multiple times. He died later at the hospital. He was unarmed.	http://abc11.com/archive/8408036/	Bobby Cash; Heather Napieralski	Yes	1	I've already requested to receive updates.
PALuzerne	2014-08-23 00:24:02	2011-10-27	PA - Pennsylvania	Luzerne	Wilkes-Barre	Luzerne County Sherrif's Office	Derrick D. Green	29	Male	White	Unknown	White	3	Hit	Armed	Handgun	Green advanced on and shot at police. This was done in daylight on the street near a daycare and other commercial businesses. Green was shot three times, and was hospitalized.	http://citizensvoice.com/news/da-wilkes-barre-police-were-justified-in-city-shooting-1.1223814		Yes	5	I've already requested to receive updates.
SCCharleston	2014-08-23 00:38:11	2011-10-27	SC - South Carolina	Charleston	North Charleston	North Charleston Police	Cody Adams	63	Male	White	Not of Hispanic or Latino origin	White	1	Killed	Armed	Handgun	Adams brought a gun into his property manager's office, fired it near her, her grown child, and her husband, but didn't hit any of them. He was asking for help at this time, and returned to his recently deceased mother's home. When officer's arrived, he pointed a gun at them and was shot once. Per the property manager, "He was a nice man," she said. "He was a lonely man. I knew he didn't mean any…	http://www.abcnews4.com/story/15891901/officers-responding-to-reported-shooting-in-n-charleston		Yes	2	I've already requested to receive updates.
CAShasta	2014-08-27 23:10:03	2011-10-28	CA - California	Shasta		California Highway Patrol	Albert Anthony Smith,	42	Male	White	Not of Hispanic or Latino origin	White		Hit	Armed	Rifle	Vehicle of suspect in 11 counts of attempted murder of a police officer in Oregon was identified driving south on Interstate 5. Following a 50-mile chase, suspect emerged from the vehicle with an assault rifle, and officers opened fire.	http://blogs.sacbee.com/crime/archives/2011/10/suspect-chp-dog-recovering-after-thursday-shooting-on-i-5.html		Yes	5	No thanks.				2013-10-27	2	No, I have an incident/more incidents to log.
CAFresno	2014-08-23 18:07:35	2011-10-30	CA - California	Fresno	Fresno	Fresno Police Department	Guy Stowers	21	Male	Black or African American	Not of Hispanic or Latino origin	Black	11	Hit	Armed	Handgun	Officers approached a vehicle at a convenience store matching the description of a vehicle used in a drive by shooting approximately 45 minutes prior. The driver and the rear passenger complied with officer instructions while the front passenger, Stowers, grabbed and pointed a handgun at an officer. He was subsequently wounded and arrested.	http://abclocal.go.com//story?section=news/local&id=8412259		Yes	5	No thanks.
AZMaricopa	2014-08-22 15:46:45	2011-11-01	AZ - Arizona	Maricopa	Mesa	Mesa PD & US Marshalls	Jesse Espinoza	24	Male	White	Hispanic or Latino origin	Hispanic	10	Hit	Unarmed	Unarmed	The U.S. Marshals Service was working with the Mesa Police Department to serve a felony search warrant on a subject. Espinoza tried to get away by ramming two unmarked police cars, then flee on foot (when he was shot).	http://www.kpho.com/story/15926945/suspect-injured-in-officer-involved-shooting		Yes	5	I've already requested to receive updates.
CAOrange	2014-08-22 15:38:03	2011-11-01	CA - California	Orange	Westminster	Huntington Beach PD	Erick Catalan	20	Male	White	Hispanic or Latino origin	Hispanic		Killed	Armed	Handgun	Officers stopped a car with two men and a woman inside. Officers were waiting for backup to remove the men when a gun went off in the car. Officers fired back killing the two men. Courts later found the officers justified in their shooting.	http://www.ocregister.com/articles/catalan-631052-car-torres.html	Officer Kenton Ferrin & Sgt. Tom Weizoerick	Yes	5	Add me!	Pat F	FlemingPJL@gmail.com
CAOrange	2014-08-22 15:41:33	2011-11-01	CA - California	Orange	Westminster	Huntington Beach PD	John Torres	26	Male	White	Hispanic or Latino origin	Hispanic		Killed	Armed	Handgun	Officers stopped a car based on a tip that the driver (known gang member and parolee) had gun (later found on him). After the gun went off in the car, officers returned fire killing two men in the car.	http://www.ocregister.com/articles/catalan-631052-car-torres.html	Officer Kenton Ferrin & Sgt. Tom Weizoerick	Yes	5	I've already requested to receive updates.
NCStanly	2014-08-22 16:15:02	2011-11-02	NC - North Carolina	Stanly	Albemarle	Albemarle Police Dept	James Mark Coggins	48	Male	White	Not of Hispanic or Latino origin	White		Killed	Armed	Firearm; not stated	James Mark Coggins showed up at his ex's house at 6 am asking to use her phone. When she said no, he began shooting at the house. Police arrived and he was killed.	http://charlotte.twcnews.com/content/video_stories/648984/one-dead-in-shooting-involving-two-albemarle-police-officers/	Officers G.V. Frazee and J.D. Eddins	Yes	5	I've already requested to receive updates.
AZMaricopa	2014-11-14 22:12:14	2011-11-05	AZ - Arizona	Maricopa	mesa	Mesa Police	Richard Vasquez-Olvera Jr.	22	Male	White	Hispanic or Latino origin	Hispanic		Hit	Armed	Firearm; not stated	Police were in pursuit of the suspect on a bicycle for parole violation. Suspect fell from bike and pointed a weapon at police while fleeing on foot and was shot.	http://www.eastvalleytribune.com/news/article_9f80bc8b-3ae6-51bb-8402-91faec5df513.html?mode=jqm		Yes	3	I've already requested to receive updates.				2011-11-05	1	No, I have an incident/more incidents to log.
NCPasquotank	2014-09-02 09:13:20	2011-11-06	NC - North Carolina	Pasquotank	Elizabeth City	Elizabeth City College Campus Police	Rashaad Gardner	24	Male	Black or African American	Not of Hispanic or Latino origin	Black		Hit	Armed	Rifle	Officers saw subject carrying a rifle on campus and demanded that he drop the weapon. He pointed it at an officer, who shot him once in the leg.	http://hamptonroads.com/2011/11/police-shoot-man-elizabeth-city-college		Yes	3	I've already requested to receive updates.				2011-11-06	3	No, I have an incident/more incidents to log.
SCSpartanburg	2014-09-02 09:05:03	2011-11-06	SC - South Carolina	Spartanburg	Spartanburg	Spartanburg County Sheriffs	Robert Odell Brown	29	Male	Black or African American	Unknown	Black		Hit	Armed	Shotgun	"Deputies say the Brown crashed his Cadillac, got out and 'a scuffle ensued'. Brown shot Deputy Brad James twice with .410-gauge shot, once near the eye and once in the back." "Officials say James returned fire, and hit Brown before he drove off." Subject was later arrested in Virginia, traced by his cellphone.	http://www.wspa.com/story/21507221/deputy-shooting-suspect-returned-to-spartanburg	Brad James	Yes	3	I've already requested to receive updates.				2011-11-06	2	No, I have an incident/more incidents to log.
MAHampden	2014-08-20 19:46:19	2011-11-07	MA - Massachusetts	Hampden	Springfield	Springfield Police	Tahiem S. Goffe	18	Male	Black or African American	Unknown	Black	3	Killed	Unarmed	Unarmed	Goffe was behind the wheel of a car that had been reported stolen when two police cruisers boxed in the car. Goffe struck one cruiser with the car and Officer Benoit, who was on foot, fired a total of 3 shots as he was struck by the vehicle, with one shot entering the passenger-side window and striking Goffe in the head.	http://www.masslive.com/news/index.ssf/2012/05/hampden_da_mark_mastroianni_of.html	Matthew Benoit
PAPhiladelphia	2014-08-20 15:58:16	2011-11-09	PA - Pennsylvania	Philadelphia	Philadelphia	Philadelphia Police Department - 18th District	Stephen Moore	37	Male	Black or African American	Not of Hispanic or Latino origin	Black	1	Hit	Unarmed	Unarmed	The city settled with Stephen Moore in February 2013 for $2.5 million. Moore was shot inside his Southwest Philadelphia home in November 2011 by Philadelphia Police Officer Larry Shields.Police said Shields entered the home to investigate a report of a burglary and some sort of confrontation took place between the two men. Shields then fired one shot, hitting the homeowner in the arm and chest. M…	http://articles.philly.com/2011-12-11/news/30504811_1_open-investigation-stephen-moore-larry-shields	Larry Shields
FLDuval	2014-09-01 16:14:07	2011-11-13	FL - Florida	Duval	Jacksonville	Jacksonville Police	Edward Littleton	22	Male	Black or African American	Unknown	Black		Hit	Armed	Rifle	Off-duty officer was hailed to the scene of an armed robbery. Officer confronted the robbers (two) and shot subject, who was carrying an AK-47 assault rifle.	http://www.news4jax.com/news/Robbery-suspects-held-after-police-shooting/4743378	Germann	Yes	3	I've already requested to receive updates.				2011-11-13	1	No, I have an incident/more incidents to log.
SCSpartanburg	2014-09-02 03:02:32	2011-11-13	SC - South Carolina	Spartanburg	Spartanburg	Cherokee County Sheriffs	Jefferson Perry	68	Male	White	Unknown	White		Killed	Armed	Shotgun	Officers responded to a report that subject had shot a member of his family (apparently his wife). After arrival, subject fled in a vehicle. A chase ensued, followed by a crash, and an exchange of gunfire with officers. Subject died of his injuries in hospital at a later time.	http://www.foxcarolina.com/story/16028166/deputies-investigate-deadly-shooting-in-spartanburg-county		Yes	3	I've already requested to receive updates.				2011-11-13	2	No, I have an incident/more incidents to log.
CASacramento	2014-08-31 06:52:34	2011-11-14	CA - California	Sacramento	Elk Grove	Elk Grove Police	Richard Bisbee	68	Male	White	Not of Hispanic or Latino origin	White		Killed	Armed	Handgun	Subject fired and wounded an officer of the California Highway Patrol (CHP) during a routine traffic stop. Officer had called for assistance, and officers arriving chased and fired on the subject's vehicle. When the vehicle was stopped, officers gave several warnings in a standoff, until an officer "spotted a threat" and fired on the subject, wounding him fatally.	http://sacramento.cbslocal.com/2011/11/14/coroner-identifies-man-killled-by-police-after-allegedly-shooting-chp-officer/		Yes	3	I've already requested to receive updates.				2011-11-13	1	No, I have an incident/more incidents to log.
FLPalmBeach	2014-08-31 21:05:51	2011-11-14	FL - Florida	PalmBeach		Palm Beach County Sheriffs	Jamar F. Anderson	24	Male	Black or African American	Not of Hispanic or Latino origin	Black	1	Killed	Armed	Vehicle	Officers responded to a residential 911 call reporting an intruder. Subject was fleeing the scene on arrival. Subject stopped, officers approached, subject drove car at officers, and Bethel shot subject fatally in the neck.	http://articles.sun-sentinel.com/2011-11-14/news/pb-royal-palm-home-invasion-20111114_1_ruben-charles-debrosse-deputies-bethel-shot	Bethel	Yes	3	I've already requested to receive updates.				2011-11-12	9	No, I have an incident/more incidents to log.
WAPierce	2014-08-31 06:45:51	2011-11-14	WA - Washington	Pierce	Bonney Lake	Pierce County Sheriffs	Holly Crahay	38	Female	White	Not of Hispanic or Latino origin	White		Killed	Armed	Handgun	After observing subject driving erratically in a shopping center parking lot, officers attempted a traffic stop. When subject did not stop, officers pinned vehicle against guard rail to force a stop. Subject opened fire with a pistol, and officers returned fire. Subject later died at hospital. News: http://www.blscourierherald.com/news/133825983.html#	https://www.youtube.com/watch?v=PojJHvbqAso		Yes	3	I've already requested to receive updates.				2011-11-13	1	No, I have an incident/more incidents to log.
WAStevens	2014-08-31 07:49:13	2011-11-14	WA - Washington	Stevens	Colville	Colville Police	Sean Joseph Bergstrasser	21	Male	White	Not of Hispanic or Latino origin	White		Killed	Armed	Handgun	Officers responded to a report of a vehicle prowler. Subject was shot and fatally wounded after officers arrived on the scene. Report states that subject had a gun in his possession.	http://www.spokesman.com/stories/2011/nov/14/colville-polilce-shooting-victim-transient/		Yes	3	I've already requested to receive updates.				2011-11-12	1	No, I have an incident/more incidents to log.
WIBrown	2014-08-31 06:38:12	2011-11-14	WI - Wisconsin	Brown	Green Bay	Green Bay Police	David Spencer	35	Male	White	Not of Hispanic or Latino origin	White		Killed	Armed	Handgun	Subject, intoxicated, agitated, and with a handgun was approached by officers after a report of a disturbance at a restaurant. Report states subject pointed gun at his head, then at an officer. Officers fired, subject died of multiple gunshot wounds. News report: http://archive.greenbaypressgazette.com/article/20140308/GPG0101/104150003/Wife-children-police-all-affected-by-fatal-shooting	http://www.jrn.com/nbc26/news/133856553.html	Beguhn & Salzmann	Yes	3	I've already requested to receive updates.				2011-11-12	1	No, I have an incident/more incidents to log.
CAAlameda	2014-08-27 14:49:31	2011-11-15	CA - California	Alameda	Berkeley	UC Berkeley Police	Christopher Travis	32	Male	White	Not of Hispanic or Latino origin	White	2	Killed	Armed	Handgun	Student pulled, did not fire, gun on campus police in a busy computer lab. After telling the student to put down gun, Sgt. Tucker opened fire. Not sure how many shots -- news reports list "several" so I'm limiting it to two to be on the safe side. Suspect died the next day.	http://www.huffingtonpost.com/2011/11/16/christopher-travis-berkeley-shooting_n_1098500.html	Sgt. Andrew Tucker	Yes	4	Add me!	Brendon Bouzard	bouzard@gmail.com	brendonbouzard	2011-11-15	1	This is the first incident I am logging.
MDHoward	2014-08-27 14:59:39	2011-11-15	MD - Maryland	Howard	Hanover	Howard County PD	Jeffrey Dustin Nichols	19	Male	White	Not of Hispanic or Latino origin	White	8	Killed	Armed	Firearm; not stated	Officers responding to a report of shots fired; upon finding a mentally disturbed man with a gun, they order him to drop it. He implores them to kill him, they fulfill his request.	http://www.baltimoresun.com/explore/howard/news/crime/ph-ho-cf-glances-nichols-death-1117-20111114,0,4251267.story	Ofc. Bryce Buell; Sgt. Jayson Janowich; Ofc. Brian Klakring; Ofc. Joshua Mouton; Ofc. Ryan Saulsbury; Ofc. James Zammillo	Yes	2	I've already requested to receive updates.				2011-11-07	1	No, I have an incident/more incidents to log.
TNKnox	2014-08-27 15:04:41	2011-11-15	TN - Tennessee	Knox	Knoxville	Knoxville PD	Zachary Blaine Russell	21	Male	White	Not of Hispanic or Latino origin	White		Killed	Armed	Handgun	Shoplifting suspect pulled a gun while police were trying to cuff him. Only one of two officers on scene fired.	http://www.wate.com/story/16049770/knoxville-police-shoot-and-kill-armed-shoplifting-suspect	Ofc. John Mays	Yes	4	I've already requested to receive updates.				2011-11-15	3	No, I have an incident/more incidents to log.
INTippecanoe	2014-08-28 15:55:29	2011-11-18	IN - Indiana	Tippecanoe	Lafayette	Lafayette Police	Paul Spencer	39	Male	Black or African American	Not of Hispanic or Latino origin	Black	10	Killed	Armed	Knife or cutting instrument	Spencer drew a knife on officers, wounded a third officer in the cheek. Webb & Fisher responded with gunfire.	http://www.policemag.com/channel/patrol/news/2011/11/18/video-suspect-fatally-shot-after-knife-attack-on-cop.aspx	Webb & Fisher	Yes	3	No thanks.				2011-10-19	1	No, I have an incident/more incidents to log.
KYJefferson	2014-08-28 16:45:42	2011-11-18	KY - Kentucky	Jefferson	Lousiville	Louisville Sheriffs	Tammie Ortiz		Female	White	Not of Hispanic or Latino origin	White		Hit	Unarmed	Unarmed	Local constable shot at a Walmart customer he suspected of shoplifting. By all accounts, the constable involved was something of a loose gun, so to speak. Full-ish report: http://www.louisvillepolitics.com/constable-david-whitlock-caught-in-lies-again/	http://www.wave3.com/story/16071549/metro-council-introduces-ordinance-after-constable-involved-shooting		Yes	3	No thanks.				2011-11-02	2	No, I have an incident/more incidents to log.
SCLancaster	2014-08-28 21:47:26	2011-11-18	SC - South Carolina	Lancaster		Lancaster Sheriffs	Rodrick Darnell Caskey	19	Male	Black or African American	Not of Hispanic or Latino origin	Black		Hit	Armed	Handgun	Officers were dining in a restaurant when Caskey entered in an attempt at armed robbery. An exchange of gunfire ensued, in which Rollins and Caskey were both hit. Both were non-life-threatening injuries.	http://www.wbtv.com/story/16070434/police-investigating-officer-involved-shooting-in-lancaster	Rollins & others	Yes	3	No thanks.				2011-11-17	3	No, I have an incident/more incidents to log.
AZMaricopa	2014-08-22 21:36:29	2011-11-19	AZ - Arizona	Maricopa	Tolleson		Peter Ledesma	27	Male	White	Unknown	White		Hit	Armed	Handgun	Victim reportedly got in altercation at a bar. Upon exiting the bar, victim took out gun and pointed it at people nearby. When officers arrived, victim started shooting at crowd. Officers fired several shots.	http://www.abc15.com/news/region-west-valley/tolleson/police-shoot-man-with-gun-outside-tolleson-bar		Yes	5	I've already requested to receive updates.
CALosAngeles	2014-08-22 21:28:07	2011-11-19	CA - California	LosAngeles	South Los Angeles	Los Angeles Police Department	Kamisha Davidson	30	Female	Black or African American	Not of Hispanic or Latino origin	Black	1	Hit	Unarmed	Unarmed	Officers responded to a call in which victim's mother had originally addressed to Department of Mental Health--as victim had schizophrenia. Officers confronted victim (Davidson) in the residence, apparently ignoring paramedics offer to intervene. Upon attempting to handcuff here, victim struggled with officers, at which point one officer shot victim in stomach.	http://losangeles.cbslocal.com/2013/10/29/family-sues-lapd-over-shooting-of-mentally-ill-baldwin-hills-woman/		Yes	2	I've already requested to receive updates.
CAOrange	2014-08-22 21:08:33	2011-11-19	CA - California	Orange	Garden Grove	Garden Grove Police Department	Jason Nuñez	31	Male	Unknown	Hispanic or Latino origin	Hispanic	1	Killed	Armed	Knife or cutting instrument	Officer responded to 911 call from a caller reporting being attacked with a knife by victim (Jason Nunez). Officer encountered victim in the area; after ordering the victim to drop the weapon, victim advanced rapidly toward officer with knife drawn. Officer shot one round.	http://www.orangecountyda.com/docs/jason_nunez_ois_letter.pdf	Omar Perez	Yes	5	I've already requested to receive updates.
CASanJoaquin	2014-08-22 21:58:05	2011-11-19	CA - California	SanJoaquin	Stockton	California Highway Patrol	Jose Daniel Orosco	21	Male	White	Hispanic or Latino origin	Hispanic		Killed	Armed	Vehicle	Victim sped away from officers during a traffic stop, then lost control of vehicle. Officers pursued, and once victim had crashed, got out of patrol car and ordered victim to get out. Victim put car in reverse and struck patrol car; officers fired on victim. NOTE: Googling further shows court documents of filings for excessive force and disputed events, so story is unclear. See http://www.gpo.gov…	http://www.recordnet.com/apps/pbcs.dll/article?AID=/20111120/A_NEWS02/111200314/-1/SPORTS		Yes	3	I've already requested to receive updates.
MEFranklin	2014-08-22 21:42:11	2011-11-19	ME - Maine	Franklin	Farmington	Farmington Police Department	Justin Crowley-Smilek	28	Male	White	Not of Hispanic or Latino origin	White	7	Killed	Armed	Knife or cutting instrument	Victim (Crowley-Smilek) went to municipal building and called police himself, apparently requesting mental health attention. Officer came out of building, saw victim walking away, and called out to him. Upon seeing a knife in victim's hand, officer took cover and fired 7 or more shots at victim, killing him.	http://www.pressherald.com/2013/12/03/town_sued_in_shooting_death_of_army_veteran_/	Ryan Rosie	Yes	1	I've already requested to receive updates.
KYShelby	2014-08-27 03:56:57	2011-11-21	KY - Kentucky	Shelby	Shelbyville	Shelbyville Police Department	Trey Williams	18	Male	Black or African American	Not of Hispanic or Latino origin	Black	3	Killed	Unarmed	Blunt object (clubs, hammers, etc.)	Suspect was confronted by officers investigating a break-in, and found to be carrying a pipe which might have been used to break a window. Suspect was fatally shot by officers minutes after the encounter. Other circumstances related in the news report are in dispute. Family sources suggested that he had been Tasered before being shot.	http://www.wkyt.com/home/headlines/KSP_name_officers_involved_in_fatal_shooting_of_Shelbyville_teen_134221738.html		Yes	2	No thanks.				2011-11-19	1	No, I have another incident to log.
NVClark	2014-08-20 14:02:05	2011-11-22	NV - Nevada	Clark	Las Vegas	Las Vegas Metro police			Male	Black or African American	Unknown	Black		Killed	Armed	Unknown	ccording to Metro, seven officers were patrolling the area when they encountered a black man in his 20s. Officers tried to stop the man but he took off running. Officers chased after him with one officer firing a gun and hitting the suspect.	http://www.fox5vegas.com/story/16098780/metro-investigating-officer-involved-shooting
WAPierce	2014-08-23 18:34:58	2011-11-27	WA - Washington	Pierce	Tacoma	Tacoma Police Department	Austin Joseph Welling	18	Male	White	Unknown	White	4	Killed	Unarmed	Unarmed	Police say Welling had been pulled over on suspicion of driving a stolen car. When the officer got out of his patrol car Welling put his car into reverse and Beall fired 4 times into the car.	http://blogs.seattletimes.com/today/2012/02/man-shot-in-november-by-tacoma-police-dies/	Brett Beall	Yes	2	I've already requested to receive updates.
GAFulton	2014-08-23 18:08:10	2011-11-30	GA - Georgia	Fulton	Atlanta	Atlanta Police Department	Carulus Hines	40	Female	Black or African American	Unknown	Black	16	Killed	Armed	Knife or cutting instrument	Hines was fatally stabbing her 4 year old daughter when police shot her.	http://www.11alive.com/news/article/215141/3/Autopsy-confirms-Mom-not-police-bullets-killed-her-4-yr-old-daughter		Yes	5	I've already requested to receive updates.
MEPiscataquis	2014-08-23 17:18:45	2011-11-30	ME - Maine	Piscataquis	Dover-Foxcroft	Maine State Police	Michael Scott Curtis	46	Male	White	Unknown	White	1	Hit	Armed	Handgun	Curtis murdered his wife's ex-husband and fled, later becoming engaged in a standoff with police before he too was shot and killed. Curtis worked for the town's Fire Dept and was talking with local police before the State Trooper fired from a distance.	http://bangordailynews.com/2012/07/09/news/piscataquis/attorney-general-clears-state-trooper-in-fatal-dover-foxcroft-shooting/?ref=inline	Jon Brown	Yes	3	I've already requested to receive updates.
OKOklahoma	2014-08-23 16:57:56	2011-11-30	OK - Oklahoma	Oklahoma	Oklahoma City	Oklahoma City Police	Golden Deshawn Smith	28	Male	Black or African American	Unknown	Black	1	Hit	Unarmed	Unarmed	The sergeant attempted to arrest the man on an outstanding warrant and tried to subdue him using less-lethal measures such as pepper spray, Nelson said. The man continued to fight and injured the officer's arm. Duroy then shot him in the torso to stop the assault, police said.	http://www.okcfox.com/story/22697410/man-charged-with-assaulting-officer-gets-five-years	Keith Duroy	Yes	5	I've already requested to receive updates.
NYNassau	2014-08-27 17:13:19	2011-12-02	NY - New York	Nassau	Hempstead	Hempstead Village Police	Michael Benitez	22	Male	Unknown	Hispanic or Latino origin	Hispanic	3	Hit	Armed	Handgun	Michael Benitez shot at the police officer and hit him in the arm and the back (but he was protected by his bulletproof vest). The police office returned fire and hit Michael Benitez in the left arm, left leg, and groin. Benitez pleaded guilty in January 2012 and was sentenced to 25 years in prison in April 2012.	http://www.newsday.com/long-island/nassau/vest-saves-hempstead-officer-in-shootout-1.3361623		Yes	5	No thanks.				2011-12-02	1	No, I have an incident/more incidents to log.
TXHarris	2014-08-23 02:04:30	2011-12-02	TX - Texas	Harris	South Houston	South Houston PD	Jerome Barrera Jr	25	Male	Unknown	Hispanic or Latino origin	Hispanic	1	Hit	Armed	Handgun	police saw crowd of people outside funeral home, responded to it and found suspect brandishing a pistol. supsect was shot once and taken to the hospital	http://www.yourhoustonnews.com/deer_park/news/update-suspect-shot-by-south-houston-officer-charged-with-aggravated/article_05fa0919-2219-5c0e-bbae-fe8bb8f0bebf.html	Sgt. Enrique Guzman	Yes	3	I've already requested to receive updates.
TXTravis	2014-08-20 20:40:08	2011-12-05	TX - Texas	Travis	Austin	Austin Police Department	Todd Michael Zurovetz	24	Male	White	Unknown	White	14	Hit	Unarmed	Unarmed	Zurovetz allegedly stole a pickup truck and a handgun and police engaged in a highspeed chase, until Zurovetz wrecked the car. He fled on foot and into a private home. With police surrounding the home, Zurovetz attempted to back out of the driveway in the homeowner's car and was shot multiple times by Allen as well as Travis County Sheriff's Deputy Tracy Stirman. Allen fired four shots into the c…	http://www.statesman.com/news/news/crime-law/acevedo-fires-officer-who-ran-after-car-while-shoo/nSb2P/	Christopher Allen	Yes
VACaroline	2014-08-22 22:01:18	2011-12-08	VA - Virginia	Caroline	Interstate 95	Virginia State Troopers	Herbert J. Wheeler	32	Male	White	Unknown	White		Killed	Unarmed	Unarmed	victim was stopped on a traffic violation, fled the scene and tried to get access to another vehicle on the highway. that alerted the cops to his position. when taken into custody and being put in the car a struggle ensued between the senior trooper and the victim. allegedly, the victim grabbed the trooper's firearm and shot him in the leg- the trooper then shot and killed the victim with another…	http://www.timesdispatch.com/news/man-killed-in-struggle-with-trooper-faced-child-custody-hearing/article_374424e5-07ab-5da8-8dff-8aa169ece3e4.html	Senior Trooper Michael H. Hamer	Yes	4	I've already requested to receive updates.
CALosAngeles	2014-08-22 18:21:15	2011-12-09	CA - California	LosAngeles	Los Angeles	LAPD	Tyler Brehm	26	Male	White	Unknown	White		Killed	Armed	Handgun	Tyler Brehm was walking down the street in LA brandishing a handgun and shooting cars (he hit a few people) when he was confronted by police to release his weapon. He was then shot and killed by police.	http://homicide.latimes.com/post/tyler-brehm/		Yes	5	I've already requested to receive updates.
LALafayetteParish	2014-11-14 23:08:51	2011-12-09	LA - Louisiana	LafayetteParish	Lafayette	Lafayette Police Department	Quamaine Mason	21	Male	Black or African American	Unknown	Black		Killed	Armed	Handgun	Police were called to off campus student housing after a jilted boyfriend attempted to acquire his dog from his ex-girlfriend's residence. Two other males were present, and after initial conflict the four eventually peacefully resolved the dispute and returned possession to the victim. In the process, the dog escaped through the open front door to find police and canine units outside. The female …	http://www.theadvertiser.com/story/news/local/2014/10/29/mason-family-wants-justice-police-shooting-lawsuit/18143969/	Martin Faul	Yes	1	I've already requested to receive updates.				2011-12-09	1	No, I have an incident/more incidents to log.
NJBergen	2014-08-22 10:27:49	2011-12-10	NJ - New Jersey	Bergen	Garfield	Garfield Police Department	Malik Ashanti Williams	19	Male	Black or African American	Not of Hispanic or Latino origin	Black		Killed	Armed	"unspecified" garage tools	Williams voluntarily turned himself in for a domestic violence warrant but for some reason he fled the police station. Officers and a K-9 unit pursued him and found him holed up in a garage. When they opened the garage door, officer saw that Williams was armed with "garage tools" so they opened fire and killed Williams	http://www.nj.com/bergen/index.ssf/2011/12/supporters_of_teen_killed_in_police-involved_shooting_take_to_garfield_streets.html		Yes	1	No thanks.
MOSt.Louis	2014-08-25 11:13:27	2011-12-12	MO - Missouri	St.Louis	Overland	Overland Police Department	Jerry Lee Mann	68	Male	White	Unknown	White	1	Killed	Armed	Knife or cutting instrument	Police ordered Mann to drop his knife, when he didn't he was shot once and died. Mann was a decorated Vietnam veteran. http://www.findagrave.com/cgi-bin/fg.cgi?page=gr&GRid=82063477	http://www.stltoday.com/news/local/crime-and-courts/police-identify-man-shot-to-death-by-overland-cop/article_bd59b3e8-27f6-11e1-875e-001a4bcf6878.html		Yes	1	I've already requested to receive updates.
NVClark	2014-08-21 15:10:25	2011-12-12	NV - Nevada	Clark	Las Vegas	Las Vegas Police Department	Stanley Gibson	43	Male	Black or African American	Not of Hispanic or Latino origin	Black	4	Killed	Unarmed	Unknown	Stanley Gibson was a Gulf War Veteran who suffered from PTSD. Jesus Arevalo suspected Gibson of a recently called in a mistaken attempted burglary report. Gibson refused to get out of his car and the officer's shot him with a beanbag shotgun and pepper spray in order to get him out of the car. Arevalo was supposed to cover one side of the car with an AR-15. Gibson began revving the engine and spi…	http://www.reviewjournal.com/news/officer-who-shot-killed-gulf-war-veteran-fired	Jesus Arevalo	Yes	1
ALColbert	2014-08-25 10:13:27	2011-12-15	AL - Alabama	Colbert	Muscle Shoals	Muscle Shoals Police Department	Shane Marshall Rea	38	Male	White	Unknown	White	1	Killed	Armed	Knife or cutting instrument	Police officers responded to a stabbing in progress and ordered Rea to drop his weapon. Officers said he refused and that's when one of the officers fired a shot. Rea died from the gunshot.	http://www.waff.com/story/16327894/muscle-shoals-police-officer-shoots	Jeremy Behel	Yes	3	I've already requested to receive updates.
NYOnondaga	2014-08-25 10:02:02	2011-12-15	NY - New York	Onondaga	Syracuse	Syracuse Police Department	Adam James Goodman	25	Male	White	Unknown	White	1	Killed	Armed	Toy/fake/non-lethal gun	Officer Henderson responded to a 911 burglary call and found Henderson on the back porch stating he had a gun. Goodman fired his weapon, Henderson fired back killing Goodman. Police later found Goodman was carrying a BB gun.	http://www.cnycentral.com/news/story.aspx?id=714942	Scott Henderson	Yes	3	I've already requested to receive updates.
LACaddoParish	2014-08-23 18:47:41	2011-12-16	LA - Louisiana	CaddoParish	Shreveport	Shreveport Police Department	Michael Dewayne Gilyard	44	Male	Black or African American	Unknown	Black	3	Killed	Armed	Handgun	Police say Gilyard began fighting with the officer when he discovered a handgun concealed in his pants. In the struggle that followed, Gilyard allegedly went for the officer's handgun, prompting Lauzon to fire three shots, striking him once in the back.	http://www.ksla.com/story/16601201/dash-cam-video-of-officer-involved-shooting-released	Bryan Lauzon	Yes	3	I've already requested to receive updates.
CALosAngeles	2014-08-22 17:49:37	2011-12-17	CA - California	LosAngeles	Los Angeles	LA Sheriffs Dept	Roberto Rodriguez	32	Male	Unknown	Hispanic or Latino origin	Hispanic		Killed	Armed	Firearm; not stated	victim was brandishing a gun on the scene of a house fire, was told to put it down by cops, he refused, cops shot him and killed him	http://homicide.latimes.com/post/roberto-rodriguez-2/		Yes	2	I've already requested to receive updates.
GAGwinnett	2014-08-25 11:40:48	2011-12-19	GA - Georgia	Gwinnett	Buford	Gwinnett Police Department	Dawntrae Williams	15	Male	Black or African American	Unknown	Black	12	Killed	Armed	Knife or cutting instrument	Police responded to a 911 call for a child with a machete. Police allege 5' 110 lb Williams would not drop the machete so they fired 12 shots at him and he died.	http://m.gwinnettdailypost.com/news/2013/feb/22/da-police-shooting-of-15-year-old-justified/	B.J. Irvine , D.A. Genaro	Yes	2	I've already requested to receive updates.
CAContraCosta	2014-08-20 22:38:05	2011-12-21	CA - California	ContraCosta	RIchmond	Richmond Police		22	Male	Black or African American	Not of Hispanic or Latino origin	Black	1	Hit	Armed	Handgun	The shooting occurred after the suspect was involved in an altercation with a hotel employee at the Extended Stay America hotel at 3170 Garrity Way in Richmond, CA.	http://richmondconfidential.org/2011/12/21/man-shot-in-officer-involved-shooting-near-hilltop-mall/		Yes
WAYakima	2014-08-20 22:49:47	2011-12-21	WA - Washington	Yakima	Yakima	Yakima Police Department	Stuart Morgan		Male	White	Not of Hispanic or Latino origin	White	1	Killed	Armed	Knife or cutting instrument	Stuart Morgan was killed by a Yakima police officer after the officer entered his home in response to a police complaint. According to the article, Stuart Morgan was a convicted felon well known to police.	http://www.kimatv.com/news/local/Man-killed-in-officer-involved-shooting-us--136040803.html?tab=video&c=y		Yes
CARiverside	2014-08-20 23:29:48	2011-12-22	CA - California	Riverside	Riverside	Riverside Police Deparmtent	Michael Charles Easley	22	Male	Black or African American	Not of Hispanic or Latino origin	Black		Hit	Armed	Unknown	On Thursday, December 22, 2011, at approximately 8:17 PM, Patrol Officers from the Riverside Police Department attempted to get the vehicle that Easley's wife was driving to pull over at 12th Street and Chicago in the City of Riverside. They continued driving and he fled on foot when he was shot several times. The report said he was a parolee in illegal possession of a firearm, but no viewing of …	http://www.riversideca.gov/rpd/press/2011releases/122211ois.pdf		Yes
CASanBernardino	2014-08-20 23:17:53	2011-12-26	CA - California	SanBernardino	San Bernardino	San Bernardino Police Department	Nicholas Henry Jeter	23	Male	Unknown	Hispanic or Latino origin	Hispanic	8	Killed	Unarmed	Unarmed	On December 26, 2011, at approximately 9:50 p.m., Jeter entered the 7-11 store located at 207 West Highland Avenue, in the City of San Bernardino. Upon entry he confronted the female store clerk at the counter with a black sock covering his left hand and possibly a knife in his right hand. She believed he had a gun, but when his body was searched after the shooting all they found were two black s…	http://www.sbcountyda.org/Portals/8/PressReleases/2014/(1-16)%20OIS%20REPORT%20-%20NON-FATAL%20-%20NICHOLAS%20JETER.pdf	Jose Vasquez, Roberto Retamoza	Yes
MDPrinceGeorge's	2014-08-20 19:47:33	2011-12-26	MD - Maryland	PrinceGeorge's	Bowie	Bowie Police Department	Joey Moreland	26	Male	White	Not of Hispanic or Latino origin	White	5	Hit	Unarmed	Unarmed	Cops came to the kid's house to question him about a stolen car. He freaked and ran away down the street to a neighbor's truck that was idling in the driveway. He got in and started to back out and cops chased him, shooting multiple times into the car, hitting him in the side of the face and shattering his jaw and throat. "My son's not a vicious person. He's tied up in drugs yeah, he steals, but …	http://www.wjla.com/articles/2013/12/joey-moreland-shot-by-d-c-officer-in-bowie-98615.html#ixzz3AylOV34s
NJEssex	2014-08-20 19:23:58	2011-12-26	NJ - New Jersey	Essex	Newark	Newark Police Department, NJ State Troopers	Corey Bland	38	Male	Black or African American	Not of Hispanic or Latino origin	Black		Hit	Unarmed	Unarmed	Corey Bland, 38, celebrated his birthday by stealing a 2005 Audi at gunpoint, police said. Hours later, when a state trooper spotted him driving the vehicle, he sped away, sparking a wild chase that spanned two counties and involved three police agencies. When it was over, two hours later, Bland was hospitalized in critical condition after ramming several police cruisers and nearly running over a…	http://www.nj.com/news/index.ssf/2011/12/lengthy_police_chase_ends_with.html
ARPulaski	2014-08-20 18:57:30	2011-12-27	AR - Arkansas	Pulaski	Little Rock	Little Rock Police Department	Joseph Williams	29	Male	Black or African American	Unknown	Black		Hit	Unarmed	Unarmed	An off-duty Little Rock officer working as a mall security guard responded to complains by a woman that a car with 3 persons in it was "harassing" her 17-yr-old daughter by telling her to get in their car. (Cops later concluded this was "NOT a kidnapping attempt" (!) Three mall security guards approached the car, which began to "back away fast" so one of the guards, off-duty Little Rock Officer C…	http://www.katv.com/story/16400247/update-driver-shot-at-park-plaza-mall-receives-multiple-charges	Officer Christopher Johannes
ARPulaski	2014-08-20 19:12:36	2011-12-27	AR - Arkansas	Pulaski	Little Rock	Little Rock Police Department	Keithen D. Pettus	48	Male	Black or African American	Unknown	Black		Hit	Unarmed	Unarmed	Officer Johannes responded to a call from 2 mall security guards that a mother was complaining a car with 3 black men in it was "harassing" her 17-year-old daughter by asking her to get in the car. (Cops later "confirmed" this "wasn't a kidnapping attempt" snort). The mall cops called the real cops. When they showed up the car attempted to back away and the officer told it to stop and then fired …	http://www.arktimes.com/images/blogimages/2011/12/29/1325168019-detectivesummary.pdf	Officer Christopher Johannes
NYAlbany	2014-08-25 13:55:22	2011-12-29	NY - New York	Albany	Albany	Albany Police	Nah-Cream Moore	19	Male	Black or African American	Unknown	Black	3	Killed	Armed	Handgun	Police pulled over a vehicle containing Moore who was wanted for a robbery. Moore exited the vehicle and in a struggle Moore's gun was exposed. Mulligan fired three shots into Moore's chest killing him.	http://www.timesunion.com/local/article/Legal-end-to-lethal-case-3427330.php#page-1	Gregory Mulligan	Yes	4	I've already requested to receive updates.
FLMiamiDade	2014-08-25 14:50:33	2011-12-30	FL - Florida	MiamiDade	Miami Beach	Miami Beach Police Office	Marvin Pognon	22	Male	Black or African American	Unknown	Black		Killed	Armed	Handgun	Police were called about a fight in pizza parlor after the bars closed. Pognon allegedly pointed a gun at police and what shot and killed. Pognon's friends and family say he carried a gun but did not point it at police. No record of an investigation could be found.	http://www.local10.com/news/Police-officer-shoots-kills-man-in-Miami-Beach/7273628		Yes	3	I've already requested to receive updates.
NYNassau	2014-08-25 14:30:24	2011-12-30	NY - New York	Nassau	East Meadow	Nassau County Police	Dwayne M. Oxley	41	Male	White	Unknown	White		Killed	Unarmed	Unarmed	Oxley was acting suspiciously and was detained by police outside of his vehicle. As a second officer responded to assist, Oxley ran back to his vehicle and locked himself inside, police said. A struggle to remove Oxley from his vehicle turned into a violent confrontation for the officer’s weapon. The weapon discharged several times, striking the officer one time in the left leg. The second office…	http://patch.com/new-york/eastmeadow/officer-shot-at-east-meadow-plaza		Yes	2	I've already requested to receive updates.
INLake	2014-08-21 16:49:07	2011-12-31	IN - Indiana	Lake	Gary	Gary Police Department	Michael Ivy	20	Male	Black or African American	Not of Hispanic or Latino origin	Black		Unknown	Armed	Firearm; not stated	Michael Ivy was involved in an armed robbery on New Years 2011. Patrolmen Rodziewicz and Peck responded to the scene and pursued suspect as he fled down an alley. Ivy allegedly pointed a gun at the officers while they were in pursuit and they shot him at least once in the neck. Ivy was transported to hospital in critical condition, could not find later reports on whether he survived or not.	http://posttrib.suntimes.com/news/crime/9794852-418/man-shot-by-gary-police-identified-as-gang-member.html#.U_ZYs-NdWOA	Brian Rodziewicz, Terry Peck	Yes	5
FLDuval	2014-08-23 09:23:44	2012-01-03	FL - Florida	Duval	Jacksonville		Carl Ian Ward	35	Male	Black or African American	Unknown	Black		Hit	Armed	Vehicle	Officers responded to a call of a person seen in the area who was wanted on a felony domestic violence warrant. The suspect was uncooperative. He rammed his car into a police officer's car while the police officer was still inside it. Another police office fired at the suspect's car.	http://www.coj.net/departments/sheriffs-office/news-room/jso-news/police-involved-shooting-on-e--21st-street.aspx	R. M. Bueno	Yes	4	I've already requested to receive updates.
NMBernalillo	2014-08-22 21:57:51	2012-01-04	NM - New Mexico	Bernalillo	Albuquerque	Albuquerque Police Department	Mark Beechum		Male	White	Not of Hispanic or Latino origin	White		Killed	Armed	Firearm; not stated	Mark Beechum and two accomplices were robbing a Catholic Center. APD arrived on the scene and fatally shot Mr. Beechum.	http://www.nmdas.com/districts/second/linked/mark%20beechum%20shooting%20review.pdf	Mario Perez	Yes	1	I've already requested to receive updates.
UTWeber	2014-08-20 17:52:13	2012-01-05	UT - Utah	Weber	Ogden	Weber County Narcotic Strike Force	Matthew David Stewart	38	Male	White	Not of Hispanic or Latino origin	White	150	Hit	Armed	Handgun	Narcotic strike force raided Matt's home late at night. Matt defended his home. Matt had his own home grow of marijuana and did not sell. One officer was killed while 6 were injured. There were over 60 bullet holes in Matt's shed where he surrendered. Matt was only shot 3 times. Matt later hung himself in jail after all the officers testified and "did not recall" if they obtained the search warra…	http://www.helpmatthewstewart.org/	Jarod Francom
CALosAngeles	2014-08-22 16:05:32	2012-01-06	CA - California	LosAngeles	Los Angeles	Los Angeles Police Department	Mark Miles	47	Male	White	Not of Hispanic or Latino origin	White		Killed	Armed	Knife or cutting instrument	Officers looking for assault suspect, finds victim inside apartment holding a steak knife, allegedly lunging forward and holding knife in threatening manner. Officers warn and fire. Victim dies in hospital two days later.	http://losangeles.cbslocal.com/2012/01/06/suspect-remains-critical-after-officer-involved-shooting-in-north-hollywood/		Yes		I've already requested to receive updates.
OHFranklin	2014-08-22 15:42:28	2012-01-06	OH - Ohio	Franklin	Columbus	Columbus Police Department	Michael Jeffrey Kelly (a.k.a. Patrick Kelly)	36	Male	White	Not of Hispanic or Latino origin	White		Killed	Armed	Vehicle	Police approach man stealing catalytic converter, victim gets into his SUV and allegedly drives at the police. One office struck, suffering minor knee injuries. Police (2) fire multiple rounds, killing victim.	http://www.nbc4i.com/story/20738124/theft-suspect-killed-in-officer-involved-shooting-identified		Yes	2	I've already requested to receive updates.
CALosAngeles	2014-08-23 09:38:48	2012-01-07	CA - California	LosAngeles	Los Angeles	LAPD	Juan Noel Nunez	34	Male	Unknown	Hispanic or Latino origin	Hispanic		Killed	Armed	Firearm; not stated	Police responded to a call about an unarmed man. They found Mr. Nunez standing by a car. When the asked him to show his hands, he did not comply. One officer fired. He was hit by multiple bullets and was killed.	http://homicide.latimes.com/post/juan-nunez/	Unknown	Yes	1	I've already requested to receive updates.
CASanBernardino	2014-08-23 09:45:49	2012-01-07	CA - California	SanBernardino		San Bernadino Police	Unknown		Male	Unknown	Hispanic or Latino origin	Hispanic		Killed	Armed	Firearm; not stated	Police attempted to stop a man who was walking over a bridge. The man ran from the police, and fired shots. The police fired back, killing the man.	http://www.nbclosangeles.com/news/local/Two-Dead-in-Separate-Police-Shootings-136883568.html	unknown	Yes	2	I've already requested to receive updates.
FLBroward	2014-08-24 08:54:19	2012-01-10	FL - Florida	Broward	POMPANO BEACH	Broward Sheriff's Office	Johnny Wright	23	Male	Black or African American	Not of Hispanic or Latino origin	Black	11	Killed	Armed	Handgun	Wright, under investigation by authorities, was killed Tuesday after a weapons deal with an undercover deputy went wrong around 4 p.m. in the 2300 block of Northwest 12th Court in Pompano Beach.	http://articles.sun-sentinel.com/2012-01-11/news/sfl-broward-sheriffs-deputy-involved-in-pompano-shooting-20120110_1_robbery-accomplice-felony-murder-charges-undercover-deputy		Yes	3	I've already requested to receive updates.
FLSt.Johns	2014-10-14 21:39:34	2012-01-12	FL - Florida	St.Johns	Ponte Vedra	St. John's County Sheriff's Office	Daryl L. Atkins	59	Male	White	Not of Hispanic or Latino origin	White	10	Killed	Armed	Rifle	Neighbor heard commotion next door, entered apartment, found loads of ammunition and other guns, called police. Atkins was killed when he pointed gun at cops.	http://staugustine.com/news/local-news/2012-01-12-2#.VD3OJa2oFRh	Deputy David Rosado, Cpl. Paul Clark and Sgt. David Tarbert	Yes	4	Add me!	Travis Cummins	tmkcummins@gmail.com	@liftedfist	2012-01-12	1	No, I have an incident/more incidents to log.
LAOrleansParish	2014-09-13 00:26:40	2012-01-12	LA - Louisiana	OrleansParish	New Orleans	New Orleans Police Department	Donald Johnson	21	Male	Black or African American	Unknown	Black		Killed	Armed	Handgun	Killed by police following car chase.	http://webcache.googleusercontent.com/search?q=cache:2-lWqlwkQOoJ:www.wwltv.com/news/crime/Police-investigate-NO-East-shooting-137180358.html+&cd=23&hl=en&ct=clnk&gl=us		Yes	4	Add me!	Travis Cummins	tmkcummins@gmail.com		2012-01-12	1	No, I have an incident/more incidents to log.
LAOrleansParish	2014-09-13 00:03:00	2012-01-12	LA - Louisiana	OrleansParish	New Orleans	New Orleans Police Department	Andrea Price	21	Female	Black or African American	Unknown	Black		Hit	Unarmed	Unarmed	Cops respond to report of shots fired in home, chase car fleeing from scene, exchange gunfire with driver, wound passengers Jubbard Price and Andrea Price.	http://www.nola.com/crime/index.ssf/2012/01/suspect_killed_two_wounded_in.html		Yes	2	Add me!	Travis Cummins	tmkcummins@gmail.com		2012-01-12	1	No, I have an incident/more incidents to log.
TNHamilton	2014-09-13 02:10:48	2012-01-12	TN - Tennessee	Hamilton	Chattanooga	Chattanooga Police Department	Christopher Upshaw	25	Male	Black or African American	Unknown	Black		Hit	Armed	Unknown	burglary suspect shot. unclear if he pointed his gun or not. story changes a lot.	http://www.timesfreepress.com/news/2012/jan/12/suspect-served-four-months-of-six-year/	Philip Moser	Yes	1	Add me!	TRAVIS CUMMINS	tmkcummins@gmail.com	liftedfist	2012-01-10	1	No, I have an incident/more incidents to log.
NYKings	2014-11-13 22:26:56	2012-01-13	NY - New York	Kings	New York	New York Police Department	Duane Browne	26	Male	Black or African American	Not of Hispanic or Latino origin	Black		Killed	Armed	Handgun	Two gunmen had forced Duane's brother into the house in an apparent robbery. When police arrived, the gunmen fled, Duane's brother came out of the house. Soon after, Duane came out of the house with a gun. Police ordered Duane to drop the weapon, and he did not. Police opened fire, killing Duane.	http://www.nbcnewyork.com/news/local/Police-Shooting-Death-Brooklyn-137268303.html		Yes	1	I've already requested to receive updates.				2012-01-13	1	No, I have an incident/more incidents to log.
FLDuval	2014-11-16 23:20:59	2012-01-14	FL - Florida	Duval	Jacksonville	Jacksonville police	Craig Ruise	17	Male	Black or African American	Unknown	Black	7	Killed	Armed	Toy/fake/non-lethal gun	Victim had robbed a convenience store using a black spray-painted replica of a Colt 1911. Officers were staking out the convenience store, and when victim exited, the officers drew their weapons and ordered victim to halt and surrender. Victim "failed to comply" and the officers fired 7-8 shots, killing the victim.	http://jacksonville.com/news/crime/2012-01-14/story/17-year-old-holding-fake-gun-during-robbery-shot-dead-jacksonville	Mark E. Campanaro, William H. Irvin	Yes	3	I've already requested to receive updates.				2012-01-14	1	No, I have an incident/more incidents to log.
NYOrange	2014-11-16 23:14:10	2012-01-14	NY - New York	Orange	New Windsor	New Windsor Police Department	Jardell Ward	24	Male	Black or African American	Unknown	Black	2	Hit	Armed	Handgun	During a traffic stop, officer ordered victim (in the front passenger seat) to step out of the car after the victim supplied a false name. Officer reported there was a struggle, during which the victim was shot. Victim later plead guilty to second-degree criminal possession of a weapon in exchange for a maximum sentence.	http://www.midhudsonnews.com/News/2012/January/14/NWPD_shooting-14Jan12.htm		Yes	3	I've already requested to receive updates.				2012-01-14	1	This is the first incident I am logging.
CAOrange	2014-08-27 22:13:22	2012-01-19	CA - California	Orange	Anaheim	Anaheim Police Department	Roscoe Cambridge	29	Male	White	Not of Hispanic or Latino origin	White	3	Killed	Armed	police claimed he had a kitchen knife	"shot and killed by an officer in a parking lot of an Anaheim Hills police substation at 8201 E. Santa Ana Canyon Road. Cambridge, armed with a large kitchen knife, confronted a police sergeant working on his computer in a patrol car about 1 p.m. and was shot, according to police. A Bible and knife were found at the scene." suspect most likely had mental illness. (Anaheim Uprising to protest kill…	http://latimesblogs.latimes.com/lanow/2012/07/anaheim-police-shootings.html	unnamed sargeant	Yes	1	I've already requested to receive updates.				2012-01-19	1	This is the first incident I am logging.
CALosAngeles	2014-08-27 22:32:25	2012-01-23	CA - California	LosAngeles	Monterey Park	Monterey Park Police	Steven Rodriguez	22	Male	White	Hispanic or Latino origin	Hispanic	10	Killed	Armed	Blunt object (clubs, hammers, etc.)	hit 7 times. he bashed in the windows of a Carl's Jr. with a heavy metal pipe; when approached by officers, he was tased, swung at one and was then shot repeatedly. (video of this and the shooting on youtube: https://www.youtube.com/watch?v=bY5ioBvrYIg) Two bystanders were hit by stray police bullets. City paid $875K settlement to family) Student at East Los Angeles College	http://www.pasadenastarnews.com/general-news/20140304/monterey-park-paid-875000-for-an-officer-involved-shooting-case	Monterey Park Officer Everado Romo and Agent Peter Palomino	Yes	2	I've already requested to receive updates.				2012-01-23	1	This is the first incident I am logging.
ORMultnomah	2014-08-20 17:32:53	2012-01-25	OR - Oregon	Multnomah	Portland	Portland Police	Brad Lee Morgan	21	Male	White	Not of Hispanic or Latino origin	White		Killed	Armed	Toy/fake/non-lethal gun	Man called 9-1-1 saying he committed a robbery at knifepoint and was threatening to jump off of a downtown parking garage. He was also making "suicide by cop" statements to the dispatcher. After he pointed what looked like a gun at them they shot him, fatally.	http://www.oregonlive.com/portland/index.ssf/2012/01/portland_police_fatally_shot_b.html	Unknown
TXBowie	2014-08-23 10:18:06	2012-01-26	TX - Texas	Bowie		Texas Parks and Wildlife	Frank Anthony Schoen	56	Male	White	Unknown	White		Killed	Armed	Firearm; not stated	Police were called out to a suspected DWI. When police arrived, the suspect was standing near his car. Police asked him to get down on the ground. He did not comply. He shot a round into the air. Police fired at him, killing him.	http://www.ksla.com/story/16618588/suspect-shot-by-officer-in-bowie-co-identified		Yes		I've already requested to receive updates.
AZMaricopa	2014-08-22 02:18:19	2012-01-28	AZ - Arizona	Maricopa	Scottsdale		Jason Edward Prostrollo	25	Male	White	Not of Hispanic or Latino origin	White		Killed	Armed	Pool cue	Victim had pulled a knife on a cab driver and ordered him to the location where officers (responding to the report of the cab driver) found him. He was extremely intoxicated and holding two pool cues. Officers released a K-9 dog which bit him, but according to reports, did not slow him down. As conditions were "too windy" for spray or tazer, the officer shot and killed the victim. This caused som…	http://www.azcentral.com/community/scottsdale/articles/2012/01/28/20120128suspect-dead-police-dog-shot-scottsdale.html	Ron Bayne	Yes	2
CASantaBarbara	2014-08-22 02:08:59	2012-01-28	CA - California	SantaBarbara	Santa Maria		Alberto Covarrubias Jr.	29	Male	White	Hispanic or Latino origin	Hispanic		Killed	Armed	Handgun	Victim was a police officer who was being arrested for a felony involving sexual misconduct with a minor. Victim drew weapon and fired, and was shot. This incident is notable because the officer who shot the victim was his patrol partner and the best man at his wedding.	http://www.foxnews.com/us/2012/01/31/ap-exclusive-dead-officer-was-intimate-with-girl/	Matt Kline	Yes	5
ORMultnomah	2014-08-22 01:59:45	2012-01-28	OR - Oregon	Multnomah	Fairview	Fairview police	Larry McKinney	37	Male	White	Not of Hispanic or Latino origin	White	3	Killed	Armed	Knife or cutting instrument	Officers were responding to victim's mother asking for help to get the intoxicated victim out of her apartment. Officers saw that victim was wielding a knife. Officer accounts say that the victim attacked the officers with a knife; the mother's account says that the victim merely held the knife up and was not given adequate time to respond to officers' request to disarm. A wrongful death suit has…	http://www.mentalhealthportland.org/?p=13127	Mike Morton	Yes	2
ALHenry	2014-08-23 08:33:31	2012-01-31	AL - Alabama	Henry	Headland	Headland Police Department	O’Patrick Fitzgerald Humphrey	33	Male	Black or African American	Unknown	Black	1	Killed	Unarmed	Unarmed	Police arrived and scuffled with Humphrey, DA Valeska said the unnamed officer fired his gun one time, striking Humphrey in the lower abdomen. Relatives told authorities Humphrey suffered from schizophrenia.	http://www.dothaneagle.com/news/crime_court/article_708aa3a0-6a72-11e2-8887-001a4bcf6878.html	Tony Franks, Tony Smith	Yes	1	I've already requested to receive updates.
MDBaltimore	2014-08-23 08:47:53	2012-01-31	MD - Maryland	Baltimore	Baltimore	Baltimore County Police Department	Munpreet S. Chona	26	Male	White	Unknown	White	16	Hit	Unarmed	Unarmed	After a long car chase three officers surrounded Chona in his vehicle and he was fatally shot by three officers.	http://www.baltimoresun.com/news/maryland/baltimore-county/bs-md-co-chona-police-shooting-20121124,0,2692302,full.story	William Buckingham, Jeffrey Starling, and Kenneth Shipley	Yes	4	I've already requested to receive updates.
NJMiddlesex	2014-08-23 09:12:37	2012-01-31	NJ - New Jersey	Middlesex	New Brunswick	New Brunswick Police Department	Victor Rodriquez	19	Male	White	Hispanic or Latino origin	Hispanic		Hit	Armed	Toy/fake/non-lethal gun	Two police officers shot Rodriguez after he pulled the fake weapon and shot blank rounds at a crowd. Rodriguez survived but is paralyzed, the officers were cleared of any charges.	http://www.nj.com/middlesex/index.ssf/2014/01/new_brunswick_man_paralyzed_in_police_shooting_pleads_guilty_to_possessing_a_fake_gun.html	Christopher Bornheimer and Drew Weiss	Yes	4	I've already requested to receive updates.
NVClark	2014-08-23 07:44:01	2012-01-31	NV - Nevada	Clark	Las Vegas	Las Vegas Metro Police Department	Larry Barber		Male	Black or African American	Unknown	Black	3	Hit	Armed	Knife or cutting instrument	Police tried to stop Barber for jaywalking but Barber allegedly removed a knife from his pocket and started swinging the knife at Williams, who then fired approximately three rounds at Barber, according to the arrest report.	http://www.lasvegassun.com/news/2012/feb/07/charges-filed-against-k/	Steven Williams	Yes	3	I've already requested to receive updates.
TXHarris	2014-08-23 07:56:27	2012-01-31	TX - Texas	Harris	Baytown	Baytown Police Department	Shane Phillips	35	Male	White	Unknown	White		Hit	Unarmed	Unarmed	Phillips and his girlfriend had just broken up and he allegedly assaulted her. Police were called and when they arrived they found Phillips walking down the street. They say Phillips began throwing concrete rocks at them, so Martinez shot him.	http://www.civiliansdown.com/Victims%20Folders/Phillips,%20Shane%20013112/Media%20reports.html	I. Martinez	Yes	2	I've already requested to receive updates.
ILCook	2014-10-16 06:24:56	2012-02-01	IL - Illinois	Cook	Chicago	Calumet City Police	Stephon Watts	15	Male	Black or African American	Not of Hispanic or Latino origin	Black	1	Killed	Armed	Knife or cutting instrument	Stephon Watts, a 15-year old with autism was shot and killed by a Calumet City Police Officer on Feb. 1, 2012, in Dolton Chicago. The officer claimed he shot Watts because Watts "appeared to be coming at them with the knife", even though one of the officers had a taser. Stephon was holding a butter knife to try to pry open a cabinet where his father, Steven Watts, had locked his computer. Steven …	http://chicago.cbslocal.com/2012/02/19/funeral-held-for-autistic-teen-shot-killed-by-calumet-city-cops/		Yes	1	No thanks.				1993-02-01	1	This is the first incident I am logging.
CAOrange	2014-08-21 11:18:38	2012-02-07	CA - California	Orange	San Clemente	Orange County Sheriff Dept	Manuel Loggins	31	Male	Unknown	Hispanic or Latino origin	Hispanic		Killed	Unarmed	Unarmed	Sgt Loggins was shot and killed with his young daughters in the back seat of his car, he was unarmed	http://www.ocregister.com/articles/loggins-340938-deputy-department.html	Darren Sandberg	Yes
COAdams	2014-08-24 03:56:24	2012-02-07	CO - Colorado	Adams	Brighton	Brighton Police Department	Shad Lane Pemberron	36	Male	White	Not of Hispanic or Latino origin	White		Killed	Armed	Toy/fake/non-lethal gun	Authorities say Pemberton fled from police following a disturbance at a convenience store and was shot after refusing to obey orders to drop his handgun, which turned out to be a pellet gun.	http://denver.cbslocal.com/2012/01/08/police-officer-shoots-kills-suspect-in-brighton/	Sgt Doug Imfeld	Yes	3	Add me!	Allan Purtell	absolutelyallan@hotmail.com	@absolutelyallan
LAOrleansParish	2014-08-20 15:21:14	2012-02-07	LA - Louisiana	OrleansParish	New Orleans	New Orleans Police Department	Darius Williams	20	Male	Black or African American	Not of Hispanic or Latino origin	Black		Hit	Armed	Handgun	Officers patrolling an area known for drug activity and gang violence were talking to a person they stopped when they heard sounds from a nearby house. They went inside and saw Darius Williams, 20, "who pointed a gun at the officer. ... The officer then fired his own weapon, hitting the suspect in the arm," according to reports.	http://uptownmessenger.com/2012/02/suspect-shot-by-officer-in-central-city/
CAAlameda	2014-08-22 11:14:19	2012-02-08	CA - California	Alameda	Castro Valley	Berkeley Police Department	Steven Oliver Moore	48	Male	Black or African American	Not of Hispanic or Latino origin	Black		Hit	Armed	Vehicle	The incident happened at 5:00 pm at the intersection of Grove Way near Center Street in Castro Valley, according to Sgt. J.D. Nelson, a spokesman for the Alameda County Sheriff’s Department. Two Berkeley police officers traveling in an unmarked car had followed Steve Moore from Berkeley. The officers decided to arrest Moore and initiated a traffic stop. When one officer stepped out of the car, Mo…	http://www.dailycal.org/2012/02/08/berkeley-police-officers-involved-in-shooting/	Not Disclosed	Yes	3	Add me!	Allan Purtell	absolutelyallan@hotmail.com	@absolutelyallan
CAFresno	2014-08-22 10:40:34	2012-02-08	CA - California	Fresno	Fresno	Fresno Police Department	Albert Sanchez	29	Male	White	Hispanic or Latino origin	Hispanic	3	Killed	Armed	Knife or cutting instrument	He was killed on Abby near Belmont in Central Fresno around 3.40 am. Police first responded to the area after they got a call about a suspicious man who was running in the street. The first officer to arrive saw a man holding a knife. Several shots were fired.	http://abclocal.go.com//story?section=news/local&id=8535103	Not Disclosed	Yes	2	Add me!	Allan Purtell	absolutelyallan@hotmail.com	@absolutelyallan
FLMiamiDade	2014-08-22 11:43:25	2012-02-08	FL - Florida	MiamiDade	Miami, Liberty City, West Palm Beach	Miami Dade Police	Julio Santiago	33	Male	White	Hispanic or Latino origin	Hispanic		Killed	Unarmed	Unarmed	The incident unfolded around 8 p.m. Wednesday when detectives with the county’s Robbery Intervention Detail, known as “RID,” heard gunshots near Northwest 6th Avenue and 75th Street. They say they saw an SUV that had been stolen in West Palm Beach speeding away.	http://miami.cbslocal.com/2012/02/09/one-person-dead-in-nw-dade-police-involved-shooting/	Not Disclosed	Yes	1	Add me!	Allan Purtell	absolutelyallan@hotmail.com	@absolutelyallan
WAKitsap	2014-08-23 22:14:19	2012-02-08	WA - Washington	Kitsap	POULSBO	Poulsbo Police	Joseph Matthew Henninger	24	Male	White	Not of Hispanic or Latino origin	White	8	Killed	Armed	Handgun	Three Poulsbo officers were confronted with actions by the man with the gun that placed them and the public in positions of jeopardy. Officers fired shots, striking the gunman.	http://www.komonews.com/news/local/At-least-1-injured-in-Poulsbo-shooting-138980994.html?mobile=y	Officer John Halsted, Officer Ricki Sabado, Sgt. Robert Wright	Yes	4	Add me!	Allan Purtell	absolutelyallan@hotmail.com	@absolutelyallan
VACulpeper	2014-08-20 16:07:26	2012-02-09	VA - Virginia	Culpeper	Culpeper	Culpeper Police Department	Patricia Ann Cook	54	Female	White	Not of Hispanic or Latino origin	White	7	Killed	Unarmed	Unarmed		http://www.dailyprogress.com/starexponent/news/local_news/culpeper-police-terminate-officer-who-shot-woman/article_8f481469-a89f-5128-9633-bc85c785a9f0.html	Daniel Harmon-Wright
HIKauai	2014-08-23 22:06:40	2012-02-15	HI - Hawaii	Kauai	Omao	Kauai Police Department	Richard Louis	62	Male	White	Not of Hispanic or Latino origin	White	4	Killed	Armed	Blunt object (clubs, hammers, etc.)	Louis was fleeing a bench warrant and barricaded himself in his girlfriend's house. Officers surrounded him on the roof. He grabbed a "metal object" and threatened to kill an officer before the officer opened fire. Family filed a wrongful death suit.	http://www.mauinews.com/page/content.detail/id/558262/Details-emerge-in-fatal-police-shooting-on-Kauai.html?nav=5031		Yes	1	I've already requested to receive updates.
CALosAngeles	2014-08-21 11:55:57	2012-02-21	CA - California	LosAngeles	Paramount		Robert Henning	22	Male	White	Unknown	White		Killed	Unarmed	Unarmed	The incident occurred about 12:30 a.m. as deputies were attempting to approach a man, later identified as Henning, suspected of being under the influence of drugs or alcohol, KTLA-TV reported. There appeared to be a struggle for one deputy's gun, KTLA reported, and the deputy shot Henning twice in the upper body. He was pronounced dead at a hospital, Deputy Aura Sierra said.	http://homicide.latimes.com/post/robert-henning/		Yes
CALosAngeles	2014-08-23 15:54:50	2012-03-01	CA - California	LosAngeles	La Mirada	LAPD and FBI	Frank Martinez	27	Male	White	Hispanic or Latino origin	Hispanic	20	Killed	Unarmed	Unarmed	LAPD and an FBI agent came to serve an arrest warrant. Frank Martinez slipped out the back door and got onto the roof. The police shot him many times (I counted at least 20 shots on the video, likely more). They claimed that he had fired at them with his own gun, but no gun was recovered either on his body or on the crime scene. They later changed the story to say that he pointed his finger and t…	http://www.nbclosangeles.com/news/local/Police-Shooting-Victims-Family-Seeks-Legal-Action-La-Mirada-142003023.html		Yes	1	Add me!	Kent Haines	akenth@gmail.com	@mrakhaines
LAOrleansParish	2014-08-20 15:52:59	2012-03-07	LA - Louisiana	OrleansParish	New Orleans	NOPD	Wendell Allen	20	Male	Black or African American	Unknown	Black		Killed	Unarmed	Unknown	http://theadvocate.com/news/neworleans/6799062-148/nopd-officer-will-serve-4	http://theadvocate.com/news/neworleans/6799062-148/nopd-officer-will-serve-4	Joshua Colclough
CAOrange	2014-08-21 11:13:03	2012-03-10	CA - California	Orange	Rancho Santa Margarita	Orange County Sheriff Dept	Dennis Mueller	20	Male	White	Not of Hispanic or Latino origin	White	5	Hit	Unarmed	UNARMED	Deputy Cruz went to voctims home and waited for him then shot 5 times unarmed outside his home it noon after officer reported he saw him speeding on motorcycle earlier in the day	http://www.ocregister.com/articles/shooting-347617-miller-cruz.html	Manual Cruz	Yes
MISaginaw	2014-08-21 01:28:22	2012-03-23	MI - Michigan	Saginaw	Saginaw	Michigan State Troopers	Keontae Zamarus Amerson	24	Male	Black or African American	Unknown	Black		Killed	Armed	Handgun	Two Michigan State Police Troopers stopped a white car for a traffic violation. State Police say the officers made contact with the car, went back to the patrol to finish their investigation and when they approached the vehicle a second time, there was some kind of altercation between the officers and Amerson. He then pulled out a gun and fired multiple shots, hitting one of the troopers in the n…	http://www.abc12.com/story/17242057/michigan-state-trooper-shot-during-traffic-stop		Yes
TXTravis	2014-08-20 14:05:18	2012-04-05	TX - Texas	Travis	Austin	Austin Police Department	Ahmede Jabbar Bradley		Male	Black or African American	Unknown	Black		Killed	Unarmed	Unarmed	Officer pulled suspect over, detected odor of marijuana and saw white powder on victim's face. Ordered victim to exit vehicle, victim fled on foot, officer chased. Officer caught up to victim, struggle ensued with witnesses indicating victim was attempting to take officer's weapon. Officer shot victim during struggle. No charges filed against officer.	http://kut.org/post/austin-police-officer-cleared-fatal-2012-springtime-shooting	Eric Copeland
FLDuval	2014-08-27 16:16:47	2012-04-06	FL - Florida	Duval	Jacksonville	Jacksonville Sheriff's Office	Juan Montrice Lawrence	40	Male	Black or African American	Not of Hispanic or Latino origin	Black	2	Killed	Armed	Firearm; not stated	The decision by a veteran Jacksonville police supervisor to shoot an armed felon during a drug raid Thursday likely saved the lives of detectives struggling with two men only feet away, a police official said Friday. Read more at Jacksonville.com: http://jacksonville.com/community/arlington/2012-04-06/story/police-supervisor-saved-lives-shooting-armed-felon-during#ixzz3BcqSl97p	http://arlington.firstcoastnews.com/news/news/76607-one-dead-jacksonville-police-involved-shooting	Val Demps	Yes	3	No thanks.				2012-04-06	1	This is the first incident I am logging.
MISaginaw	2014-08-21 01:40:42	2012-04-10	MI - Michigan	Saginaw	Saginaw	Saginaw Police	Andre Jones	18	Male	Black or African American	Unknown	Black		Killed	Armed	Handgun	Three Saginaw police officers responded to a 911 call with the caller reporting a man with a gun in hand on his back porch, trying to break into his house. "officers...saw a young male suspect on the rear porch and called out to him twice to put his weapon down and surrender...The suspect refused to surrender and brought the handgun up and pointed it at (a Saginaw police officer) from a distance …	http://www.mlive.com/news/saginaw/index.ssf/2012/06/prosecutor_april_10_officer-in.html		Yes
NHRockingham	2014-08-20 15:29:42	2012-04-12	NH - New Hampshire	Rockingham	Greenland	Greenland Police Department	Cullen Mutrie	29	Male	White	Not of Hispanic or Latino origin	White		Killed	Armed	Assault Rifle	Drug raid on the house of Cullen Mutrie. Mutrie was a known dealer and had previously had weapons confiscated due to domestic violence incidents. A drug task force team was engaged to apprehend Mutrie, and a shoot-out ensued. Both Officer Maloney and Mutrie we killed in the encounter. Other officers were also wounded, and Mutrie's girlfriend was also killed.	http://livewire.wmur.com/Event/Armed_Officers_Respond_To_Greenland_Situation?Page=3	Mike Maloney
CALosAngeles	2014-08-21 14:51:35	2012-04-24	CA - California	LosAngeles	Pasadena	The Pasadena Police Department	Kendrec McDade	19	Male	Black or African American	Not of Hispanic or Latino origin	Black	7	Killed	Unarmed	Unarmed	Kendrec McDade was shot after police officers responded to an armed robbery 911 call. The caller lied and said McDade had a gun, so that officers would respond more quickly, when McDade was in fact unarmed.	http://www.huffingtonpost.com/2012/05/11/kendrec-mcdade-autopsy_n_1510497.html	Jeffery Newlen & Mathew Griffin	Yes	1
FLVolusia	2014-08-27 16:01:07	2012-04-30	FL - Florida	Volusia	Daytona Beach	Daytona Beach PD	Marvin Jones	22	Male	Black or African American	Not of Hispanic or Latino origin	Black	5	Hit	Armed	Firearm; not stated	Suspecting brandishing a gun around an airport opens fire after being confronted by police officer, leads them on short chase, then another shootout. Shot his pregnant girlfriend in the process.	http://www.wftv.com/news/news/local/officer-involved-shooting/nNJjc/		Yes	5	I've already requested to receive updates.				2012-04-28	2	No, I have an incident/more incidents to log.
ILCook	2014-08-27 15:55:43	2012-04-30	IL - Illinois	Cook	Chicago	Chicago PD			Male	Black or African American	Unknown	Black	3	Killed	Armed	Vehicle	Police fired on a vehicle after an armed robbery of an electronics store -- vehicle ran over an officer on its way out. Police shot all three victims; two survived.	http://www.suntimes.com/news/crime/12221771-418/cops-shoot-3-burglary-suspects-in-dramatic-getaway-attempt.html#.U_4u6LxdXIQ		Yes	5	I've already requested to receive updates.				2012-04-30	1	No, I have an incident/more incidents to log.
ORJosephine	2014-08-27 15:41:57	2012-04-30	OR - Oregon	Josephine	Cave Junction	Josephine County Sheriff's Office	Walter Britt Phillips	46	Male	White	Not of Hispanic or Latino origin	White	2	Killed	Armed	Vehicle	During high-speed pursuit, victim intentionally rammed police car. Police then opened fire, killing him.	http://jocosheriff.us/news/415-officer-involved-fatal-shooting-in-cave-junction	Deputy Robert Baker, Reserve Deputy Mike Holguin	Yes	4	I've already requested to receive updates.				2012-04-28	1	No, I have an incident/more incidents to log.
VTLamoille	2014-08-27 15:50:19	2012-04-30	VT - Vermont	Lamoille	Cambridge	Vermont State Police	Jonathan Martel	40	Male	White	Not of Hispanic or Latino origin	White	8	Killed	Unarmed	Toy/fake/non-lethal gun	Officer pursued burglary suspect on foot. Suspect pulled out object as though it was a gun. Officer put away taser and pulled out gun to shoot suspect -- missed the first seven shots, made the eighth. Upon shooting him, discovered that the suspect didn't have a gun. Claims the suspect said "I wanted to die."	http://ago.vermont.gov/focus/news/state-police-officer-justified-in-use-of-deadly-force4.php	Tpr. Dustin Robinson	Yes	2	I've already requested to receive updates.				2012-04-30	1	No, I have an incident/more incidents to log.
NCCumberland	2014-08-20 13:37:23	2012-05-05	NC - North Carolina	Cumberland	Fayetteville	Fayetteville Police Department	Mark Salazar	27	Male	Black or African American	Not of Hispanic or Latino origin	Black		Killed	Armed	Handgun	Neighbors reported someone was outside shooting. Police responded to the scene and said Mark was in the driveway with his gun. The police told the press he pointed the gun at them. They shot him. His son's mother told journalists none of the police reports of the three officers who responded say anything about him pointing a gun at them.	http://www.wxii12.com/news/local-news/north-carolina/fayetteville-police-cleared-in-soldiers-deadly-shooting/21666190#!bGM6ue
KYJefferson	2014-08-20 20:47:46	2012-05-17	KY - Kentucky	Jefferson	Louisville	Louisville Metro Police	Cheetara Goldsmith	24	Female	Black or African American	Not of Hispanic or Latino origin	Black	3	Hit	Armed	Handgun	Goldsmith is accused of shooting and killing 24-year-old Makeba Lee. Police say Goldsmith shot Lee in west Louisville last May while officers were working a double-homicide a block away. Dozens of onlookers were gathered at the scene when Goldsmith allegedly opened fire. She was then shot by a police officer and survived. Goldsmith has pleaded not guilty	https://www.lmpd.com/news/story.php?sid=997	Vadim Dale	Yes
CASantaBarbara	2014-08-20 12:59:11	2012-06-04	CA - California	SantaBarbara	Lompoc	Santa Barbara County Sheriff's Office	Lawrence Alan Kitchen		Male	White	Not of Hispanic or Latino origin	White	3	Killed	Armed	Shotgun	On June 4, 2012, at approximately 8:50 a.m., Lompoc Police Officers responded to 208 South I Street, in Lompoc on a "shots fired" call. The investigation revealed the occurrence of the following events. Lawrence Kitchen became involved in a dispute with a neighbor's visitor over parking in the multi-unit residential property. Kitchen armed himself with a shotgun and handgun. He confronted Michell…	http://www.edhat.com/site/tidbit.cfm?nid=101474&showcomments=T	Officer Dan Sessions
CASanDiego	2014-08-20 12:45:08	2012-06-06	CA - California	SanDiego	San Diego	San Diego Police	Victor Ortega	31	Male	White	Hispanic or Latino origin	Hispanic	3	Killed	Armed	Handgun	Police respond to domestic violence call. Officer struggles with suspect after flight. Officer's weapon falls on ground and is picked up by suspect. Officer shoots suspect dead.	http://www.nbcsandiego.com/news/local/Officer-Involved-Shooting-Mira-Mesa-San-Diego-Police-156989615.html	Jonathan McCarthy
AZMaricopa	2014-09-01 21:09:44	2012-06-17	AZ - Arizona	Maricopa	Phoenix	Phoenix Police, Mesa Police, Apache Junction Police	Ronald Earl Chante	51	Male	White	Not of Hispanic or Latino origin	White		Killed	Armed	Vehicle	Suspect Ronald Chante was alleged to have stolen a semi-truck from a solid waste management facility and led police on a multi-city chase, intentionally striking police vehicles and one civilian vehicle before getting the semi penned in a crash with another police vehicle. One officer approached and fired his weapon, striking and killing suspect before he could flee again.	http://www.azcentral.com/12news/news/articles/20120617phoenix-stolen-semi-suspect-shot.html		Yes	5	I've already requested to receive updates.				2012-06-17	1	No, I have an incident/more incidents to log.
TXBell	2014-09-01 21:42:14	2012-06-17	TX - Texas	Bell	Temple	Temple Police Depatment	Larry Wayne Robards	54	Male	White	Unknown	White		Killed	Armed	Handgun	Larry Wayne Robards, 54, entered the treatment area of the Scott and White Emergency Room around 6:45 p.m. and showed his gun, forcing the three hostages into a common area. After minutes of negotiating, Officer Joseph Robertson noticed one hostage struggling to grab Robards' gun and determined the other hostages and bystanders were in imminent danger, so he fired at least once at Robards, ending…	http://www.kxxv.com/story/18810015/man-killed-after-taking-hostages-at-hospital	Officer Joseph Robertson	Yes	5	I've already requested to receive updates.				2012-06-17	1	No, I have an incident/more incidents to log.
WASpokane	2014-09-01 21:26:21	2012-06-17	WA - Washington	Spokane	Spokane	Spokane Police Department	Jesse H. Johnson	24	Male	White	Unknown	White		Hit	Armed	Toy/fake/non-lethal gun	A 911 call reported a man walking through a neighborhood firing what appeared to be a rifle. When police arrived on scene, they found Jesse Johnson, carrying said weapon. Police and witnesses reported that Johnson pointed gun as though to fire at the officer. Officer Ronald Van Tassel fired at Johnson and struck his leg. He was subsequently arrested.	http://www.kxly.com/news/spokane-news/Officer-involved-shooting-at-Mission-and-Napa/15135478	Ronald Van Tassel	Yes	3	I've already requested to receive updates.				2012-06-17	1	No, I have an incident/more incidents to log.
ALhouston	2014-08-21 07:30:35	2012-06-28	AL - Alabama	houston	dothan	Dothan Police Department	Christopher Jerome Thomas	22	Male	Black or African American	Not of Hispanic or Latino origin	Black		Killed	Unarmed	Unarmed		http://www.dothaneagle.com/news/crime_court/article_95ec82dc-39ce-11e2-bf20-0019bb30f31a.html		Yes
COBROOMFIELD	2014-08-20 22:58:01	2012-06-28	CO - Colorado	BROOMFIELD	BROOMFIELD	Broomfield Police Department	Kyle Miller	21	Male	White	Not of Hispanic or Latino origin	White	3	Killed	Armed	Toy/fake/non-lethal gun	911 was called by mother to report son was mentally unstable. Reported son had a toy gun which operator assured mother that the person was not be shot at. Police claim the gun appeared real & killed person.	http://www.denverpost.com/news/ci_21481982/kyle-miller-shooting-broomfield-police-report	Jeff Smith and Tom Railsback	Yes
VAStafford	2014-08-20 18:22:30	2012-06-29	VA - Virginia	Stafford	Falmouth	Stafford Co Sheriff Dept	David Gandy	49	Male	White	Not of Hispanic or Latino origin	White	3	Killed	Armed	Firearm; not stated	Suicidal man shot in back by Stafford County (Va) deputies	http://www.staffordcountysun.com/news/article_a7dd1c4d-04e2-5e20-a55d-7636278a7e2a.html?mode=jqm	n/a
INPutnam	2014-08-20 15:15:29	2012-07-01	IN - Indiana	Putnam	Greencastle	Greencastle City Police Department	Charles Aaron Brousard	28	Male	Black or African American	Not of Hispanic or Latino origin	Black		Killed	Unarmed	Unarmed	"The altercation that followed at the public basketball court near that Sycamore Street address resulted in an unknown number of gunshots being fired by the officer. He was the only police officer believed to be on scene at the time of the incident." After investigation, no charges were filed.	http://www.bannergraphic.com/story/1903508.html	Jeremiah Jackson
MISaginaw	2014-08-21 01:22:35	2012-07-01	MI - Michigan	Saginaw	Saginaw	Saginaw Police	Milton Hall	49	Male	Black or African American	Not of Hispanic or Latino origin	Black	46	Killed	Armed	Knife or cutting instrument	"Hall was armed with a 3-inch metal folding knife." (src: http://www.mlive.com/news/saginaw/index.ssf/2012/07/saginaw_sees_third_police-invo.html ) "The eight officers, as well as a police dog, had formed a semi-circle around Hall." Six of the eight officers fired at Hall. Hall was struck 11 times. "Hall's family said that he had a history of mental illness." He was also homeless. Hall's race tak…	http://www.cnn.com/2012/09/21/justice/michigan-police-shooting/		Yes
MOJackson	2014-08-21 21:50:27	2012-07-02	MO - Missouri	Jackson	Kansas City	Kansas City Police Department	Antonio M. Taylor	28	Male	Black or African American	Not of Hispanic or Latino origin	Black	3	Hit	Armed	Handgun	News article described a "hail of gunfire" but the only details provided mentioned the 3 shots that hit the suspect. The news article also mentioned that the suspect fired at the officers 3 times. Suspect was shot after officers attempted to serve him a probation violation warrant and ran.	http://www.kctv5.com/story/18936846/officer-shoots-suspect-three-times		Yes	4
TXHarris	2014-08-23 16:45:34	2012-07-09	TX - Texas	Harris	Houston	Houston Police Departmentz	Rufino Lara	54	Male	White	Hispanic or Latino origin	Hispanic		Killed	Unarmed	Unarmed	"Two officers responded to an assault call possibly involving weapons, police say. The officers arrived at the scene and saw five males in the area. Two of them took off, and the other three began walking away. The officers followed them and ordered them both in English and Spanish to raise both of their hands. One of the men refused to follow orders and then quickly turned around for some reason…	http://abc13.com/archive/8730279/	J. McGowan	Yes	1	I've already requested to receive updates.
MOSt.Louis	2014-08-23 16:20:25	2012-07-10	MO - Missouri	St.Louis	St Louis		Brandon Jones	22	Male	Black or African American	Unknown	Black		Killed	Armed	Handgun	A group of people committed a home invasion which neighbors observed. When police arrived, some/all of them started shooting (they may have all been armed). Police returned fire. Mr Jones was killed, and another person was potentially grazed. Additional info: http://blogs.riverfronttimes.com/dailyrft/2012/07/brandon_jones_dogtown_burglary_police_shooting.php http://www.stltoday.com/news/local/cri…	http://fox2now.com/2012/07/10/suspect-shot-in-officer-involved-shooting-in-south-st-louis/		Yes	5	I've already requested to receive updates.
CTHartford	2014-11-15 02:23:51	2012-07-11	CT - Connecticut	Hartford	Hartford	Hartford Police "Southwest Conditions Team"	Ernesto Morales	31	Male	Unknown	Hispanic or Latino origin	Hispanic		Killed	Armed	Vehicle	Officers approached suspicious persons in a vehicle parked in a housing complex. Officers ordered occupants to display their hands, who responded by starting the vehicle and attempting to strike the officers, one officer fired at the driver who died at the scene.	http://www.ct.gov/despp/cwp/view.asp?A=4226&Q=507810	William Cody, Kenneth Medina, Kenneth Labbe, Robert Iovanna	Yes	5	I've already requested to receive updates.				2012-07-11	1	No, I have an incident/more incidents to log.
MOJackson	2014-09-12 21:31:56	2012-07-12	MO - Missouri	Jackson	Raytown	Raytown Police Department	Robert Long	26	Male	White	Unknown	White	1	Killed	Armed	Rifle	Long was in the Navy and awaiting deployment.	http://www.kshb.com/news/crime/police-respond-to-reported-shooting-in-raytown		Yes	2	Add me!	TRAVIS CUMMINS	tmkcummins@gmail.com	liftedfist	2012-01-12	1	This is the first incident I am logging.
CAOrange	2014-08-20 17:15:47	2012-07-21	CA - California	Orange	Anaheim	Anaheim PD	Manuel Diaz	25	Male	White	Hispanic or Latino origin	Hispanic		Killed	Unarmed	Unarmed	10/16/2012 search. Unarmed man was shot in the back while fleeing from police	http://www.voiceofoc.org/oc_north/article_268d30f6-1824-11e2-8590-001a4bcf887a.html
CAAlameda	2014-08-27 15:15:46	2012-07-25	CA - California	Alameda	Oakland	Oakland Police Department	Alan Dwayne Blueford	18	Male	Black or African American	Not of Hispanic or Latino origin	Black	4	Killed	Armed	Handgun	Suspect/victim fled stop and frisk. Witnesses claim the victim was armed but fell and dropped the gun. Witnesses claim the suspect/victim did not try to retrieve the weapon. Early reports had an exchange of gunfire with Officer Masso wounded. Further inquiry released that Officer Masso shot himself in the foot.	http://www.eastbayexpress.com/oakland/oakland-police-officer-involved-shooting-of-alan-blueford-raises-questions/Content?oid=3295686	Miguel Masso	Yes		I've already requested to receive updates.				2012-05-06	1	No, I have an incident/more incidents to log.
CAMerced	2014-08-21 14:03:10	2012-07-28	CA - California	Merced	Delhi	Turlock Police Department	Joseph Davis	29	Male	White	Not of Hispanic or Latino origin	White	3	Killed	Armed	Firearm; not stated	High speed chase ensued after officers recognized the suspect from another incident. After the suspect fired into another vehicle to attempt to carjack it, officers opened fire on the victim.	http://www.mercedsunstar.com/2012/07/29/2443561_parolee-shot-near-delhi-by-turlock.html?rh=1	Scott Ellis, Queray McMihelk, Manpreet Kaur	Yes	4
ORMultnomah	2014-08-21 14:01:08	2012-07-28	OR - Oregon	Multnomah	Portland	Portland Police Bureau	Billy Wayne Simms	28	Male	White	Not of Hispanic or Latino origin	White	1	Killed	Armed	Handgun	Vehicle was associated with a previous incident. Officers approached, when asking the occupants to exit the vehicle, the victim backed out and drove off. The officer shot at the vehicle, and the victim was found deceased when the Emergency Response Team arrived.	http://www.kval.com/news/local/Portland-Police-Man-shot-and-killed-by-officer-was-involved-in-a-crime-spree-164214656.html%20	Justin Clary	Yes	1
ALJefferson	2014-08-21 14:05:08	2012-07-29	AL - Alabama	Jefferson	Irondale	Irondale Police Department	Montavious Burrow	18	Male	Black or African American	Not of Hispanic or Latino origin	Black	1	Hit	Armed	Firearm; not stated	Police responded to a burglary call, where a witness gave police a tag number and vehicle description. Police attempted to stop the vehicle, and the driver fled on foot. Police say that the driver pulled out a gun and aimed it at the officers, and the officers fired one shot. The driver was hit, and police apprehended him after he fell down.	http://blog.al.com/spotnews/2012/07/irondale_police_sign_warrants.html		Yes	2
ARCraighead	2014-08-20 15:48:47	2012-07-29	AR - Arkansas	Craighead	Jonesobor	Jonesboro Police Department	Chavis Carter	21	Male	Black or African American	Unknown	Black	1	Killed	Unarmed	Unarmed	He was shot in the head in the back of a police car. He had his hands cuffed behind his back at the time. It was labeled a "suicide".	http://newsfeed.time.com/2012/08/21/autopsy-arkansas-man-shot-himself-while-cuffed-in-back-of-police-car/
AZMaricopa	2014-08-21 14:07:01	2012-07-29	AZ - Arizona	Maricopa	Glendale	Glendale Police Department	Kenneth Girardot	38	Male	White	Not of Hispanic or Latino origin	White	6	Killed	Unarmed	Unarmed	Officer initiated a stop; victim attempted to "aggressively" leave the parking space after officer discovered the car was stolen. The officer fired six shots at the driver, who died at the scene.	http://www.abc15.com/news/region-west-valley/glendale/pd-glendale-officer-justin-penrose-on-leave-after-deadly-shooting	Justin Penrose	Yes	1
CASantaBarbara	2014-08-21 00:02:51	2012-08-02	CA - California	SantaBarbara	Santa Maria	Santa Maria Police Department	Robert Padilla Reyes	37	Male	Unknown	Hispanic or Latino origin	Hispanic	14	Killed	Armed	Toy/fake/non-lethal gun	Reyes led the police in a car chase which ended after his car was disabled with a spike strip on Highway 1. He brandished a realistic looking fake semi-automatic weapon and all three officers fired shots. 18 shots were fired, 5 hit Reyes. He had methamphetamines in his system as well as alcohol, and already had "2 strikes" in the California system. There is some speculation that he might have bee…	http://www.lompocrecord.com/news/local/crime-and-courts/fatal-police-shooting-deemed-justified/article_faf2eda2-21bc-11e3-a73c-0019bb2963f4.html		Yes
CASacramento	2014-10-15 12:25:51	2012-08-14	CA - California	Sacramento	Folsom	Sacramento County Sheriff's Department	Joseph Carmelo Riso	32	Male	Unknown	Hispanic or Latino origin	Hispanic	1	Killed	Unarmed	Unarmed	Police searching a residential area for bank robbery suspect chased Riso. Riso entered a home; the family inside locked themselves in a bedroom and were screaming. He was shot in the back as he tried to gain entry into the locked room. He was not armed.	http://blogs.sacbee.com/crime/archives/2012/08/coroner-ids-man-shot-by-sacramento-sheriffs-deputy-after-folsom-robbery.html		Yes	1	No thanks.				2012-08-14	1	No, I have an incident/more incidents to log.
OHHamilton	2014-08-20 12:41:29	2012-08-18	OH - Ohio	Hamilton	Cincinnati	Cincinnati Police	Kevin Willingham	51	Male	Black or African American	Not of Hispanic or Latino origin	Black	4	Killed	Armed	Firearm; not stated	Went to check on the well being of a 56 year old women. The officer said Kevin became upset and closed the door. He returned with a firearm and aimed it at the officer. After repeated requests to drop his weapon Schneider shot 4 times.	http://www.wlwt.com/news/local-news/cincinnati/Man-dies-in-West-End-officer-involved-shooting/16178226#!bGPyEf	Benjamin Schneider
TXDallas	2014-10-15 22:16:01	2012-08-24	TX - Texas	Dallas	Dallas	Dallas Police Department	James Harper	31	Male	Black or African American	Not of Hispanic or Latino origin	Black	3	Killed	Unarmed	Unarmed	Police officer Rowden chases Harper through alley, fears for his life then fatally shoots suspect three times.	http://www.myfoxdfw.com/story/19103767/police-kill-suspect-in-pleasant-grove	Brian Rowden	Yes	3	I've already requested to receive updates.				2012-08-24	1	This is the first incident I am logging.
CALosAngeles	2014-10-15 12:21:19	2012-08-28	CA - California	LosAngeles	Bellflower	Los Angeles County Sheriff's Department	Tony Louis Francis	22	Male	Black or African American	Not of Hispanic or Latino origin	Black	1	Killed	Unarmed	Unarmed	A deputy said he saw Francis hit a man in the face, rob him, and flee. The deputy followed Francis into a driveway and shot and killed him while still inside his vehicle. The deputy said Francis reached for his waistband, but no gun was found.	http://www.laweekly.com/informer/2012/08/28/tony-francis-unarmed-compton-man-shot-dead-by-sheriff-family-files-civil-rights-lawsuit-alleges-coverup		Yes	1	No thanks.				2012-08-28	1	No, I have an incident/more incidents to log.
NYNassau	2014-08-27 16:45:38	2012-08-30	NY - New York	Nassau	Point Lookout	Nassau County Police Department	Kurt Doerbecker	23	Male	White	Not of Hispanic or Latino origin	White	3	Killed	Armed	Knife or cutting instrument	At 11:55 p.m., the police received another 911 call for a possible burglary on Lynbrook Drive. Allison Donnelly, 42, called the police after confronting an intruder — who was wearing a scarf over his face and holding some sort of weapon — on the first floor of the home she shares with three children and her mother, she said. The police said the intruder was Mr. Doerbecker. Ms. Donnelly’s house is…	http://www.nytimes.com/2011/08/31/nyregion/long-island-man-dies-in-nassau-county-police-shooting.html		Yes	3	No thanks.				2011-08-30	1	This is the first incident I am logging.
GACobb	2014-08-27 17:14:00	2012-09-09	GA - Georgia	Cobb	Marietta	Woodstock Police, Cobb County Police Department, Cherokee County Sheriff's Office	Jerome (Jerry) George Cundy	53	Male	White	Not of Hispanic or Latino origin	White		Killed	Armed	Toy/fake/non-lethal gun	The incident started with the armed robbery of a gas station, the description of the suspect was broadcast to all law enforcement in Cherokee County. A spokesperson for the Cherokee County Sheriff's Office says that about 45 minutes after the robbery, Woodstock police officers caught up with a vehicle they believed to be that of the suspect. Wen officers attempted to pull it over. When the driver…	http://www.my9nj.com/story/19496759/chase-deadly-officer-involved-shooting-closes-i-75-for-hours		Yes	4	I've already requested to receive updates.				2012-09-09	1	This is the first incident I am logging.
AKAnchorageMunicipality	2014-08-27 23:04:39	2012-09-13	AK - Alaska	AnchorageMunicipality	Anchorage	Anchorage Police Department	Jason Barnum	37	Male	White	Not of Hispanic or Latino origin	White		Hit	Armed	Firearm; not stated	Barnum opened fire on officers in a hotel room -- they exchanged fire. Barnum was hit in the arm and an officer was grazed in the back.	http://www.huffingtonpost.com/2012/09/15/jason-barnum-arraigned-shooting-officer-anchorage_n_1886519.html		Yes	5	Add me!		efrondorf@fuse.net		2012-09-13	1	This is the first incident I am logging.
ORMarion	2014-08-27 23:19:36	2012-09-13	OR - Oregon	Marion	Salem	Salem Police	Ricky Wayne Lewis Jr.	41	Male	White	Unknown	White		Hit	Armed	Firearm; not stated	Police responded to a domestic disturbance call and saw a man with an outstanding warrant run away from the scene. Officers followed Lewis into a home, where he opened fire. Officers returned fire, hitting Lewis multiple times.	http://www.katu.com/news/local/Officer-involved-shooting-in-Salem-sends-one-to-hospital-169730086.html?tab=video&c=y	Jason VanMeter, Ben Ruddell, Brian Bidiman	Yes	5	I've already requested to receive updates.				2012-09-13	1	No, I have an incident/more incidents to log.
VACampbell	2014-08-20 17:39:16	2012-09-19	VA - Virginia	Campbell	Altavista	Altavista Police Department	Delma Towler	83	Female	White	Not of Hispanic or Latino origin	White	3	Killed	Armed	Handgun	Officers responded to her 911 call from her home, she reported an intruder. When they arrived they found her armed and could not convince her to drop her gun and one of the officers eventually shot her when she appeared to be aiming it in his direction. "In hindsight, it appears clear that Ms. Towler, for whatever reason or reasons, was unable to understand that the individuals on her porch were …	http://www.newsadvance.com/news/local/article_fb8b303e-d76c-11e2-b9df-0019bb30f31a.html	Sergeant LP Rigney
TNShelby	2014-08-20 14:24:38	2012-09-24	TN - Tennessee	Shelby	Memphis	Memphis PD	Justin Thompson	15	Male	Black or African American	Not of Hispanic or Latino origin	Black		Killed	Armed	Firearm; not stated	10/15/2012 search, Off-duty officer was allegedly being robbed by victim whom he shot and killed. A firearm was found near the victim's body.	http://www.policeone.com/officer-misconduct-internal-affairs/articles/6011600-Teens-shooting-fuels-criticism-of-Memphis-police/	Terrance Shaw
CASanDiego	2014-08-20 14:26:55	2012-09-28	CA - California	SanDiego	San Diego	US Border Patrol	Valeria Tachiqui Alvarado	32	Female	White	Hispanic or Latino origin	Hispanic	10	Killed	Armed	vehicle	10/15/2012 search, Victim fled from a home where officers were serving a warrant on somebody else. Officer alleges victim hit him with her vehicle and he fired at her while hanging onto the car's hood.	http://soboco.org/claim-filed-against-border-patrol-in-womans-death/	Justin Tackett
MNHennepin	2014-08-23 15:12:07	2012-10-05	MN - Minnesota	Hennepin	Richfield	Richfield Public Safety	Jeffrey O'Connor	25	Male	White	Not of Hispanic or Latino origin	White		Killed	Armed	Knife or cutting instrument		http://current.mnsun.com/2012/10/breaking-richfield-police-name-officers-involved-in-shooting/		Yes	4	Add me!	Tony Zimmerman	amzimmerman08@gmail.com
ALMobile	2014-08-20 17:16:55	2012-10-06	AL - Alabama	Mobile	Mobile	University of South Alabama PD	Gil Collar	18	Male	White	Not of Hispanic or Latino origin	White	1	Killed	Unarmed	Unarmed	10/16/2012 search. Victim was tripping on LSD, naked, and pounding on the police station door.	http://cw.ua.edu/article/2012/10/south-alabama-shooting-forces-us-to-look-at-media-bias-question-law-enforcement	Trevis Austin
AZSantaCruz	2014-08-20 17:14:37	2012-10-09	AZ - Arizona	SantaCruz	Nogales	US Border Patrol	Jose Antonio Elena Rodriguez	16	Male	White	Hispanic or Latino origin	Hispanic	6	Killed	Armed	Rocks	10/16/2012 search. Officers were in pursuit of border fence jumpers when rocks came flying in from the Mexican side of the border. Officer fired across the border and hit the victim.	http://www.nogalesinternational.com/news/police-reports-describe-hail-of-rocks-prior-to-fatal-border/article_73c41da4-17a6-11e2-9642-001a4bcf887a.html
ILWinnebago	2014-08-28 21:43:20	2012-10-12	IL - Illinois	Winnebago	Rockford	Rockford PD	Logan Bell	18	Male	Black or African American	Not of Hispanic or Latino origin	Black		Killed	Armed	Toy/fake/non-lethal gun	Police responded to call of suicidal person. After a foot chase, victim allegedly raised pellet gun at officers.	http://www.wrex.com/story/19809215/pastor-and-police-speak-out-about-rockford-officer-involved-shooting		Yes	3	I've already requested to receive updates.				2012-10-11	1	No, I have an incident/more incidents to log.
MIKalamazoo	2014-08-20 14:18:13	2012-10-12	MI - Michigan	Kalamazoo	Kalamazoo	Kalamazoo PD	Brad Mason	42	Male	White	Not of Hispanic or Latino origin	White		Killed	Armed	Toy/fake/non-lethal gun	Victim was a rape suspect. When confronted, he pointed at officers an airsoft pistol from which he had removed the orange safety tip.	http://www.wwmt.com/template/cgi-bin/archived.pl?type=basic&file=/shared/news/features/top-stories/stories/archive/2014/02/5cGfeaTq.xml#.U_S3U8VdVM4
NHRockingham	2014-08-20 14:25:32	2012-10-12	NH - New Hampshire	Rockingham	Windham	Windham Police Department	Grant Hebert	21	Male	White	Not of Hispanic or Latino origin	White	20	Hit	Unarmed	Unarmed	Officers were being targets of Hebert's car and to they fired at him with only a few wounds being the result.	http://doj.nh.gov/media-center/press-releases/2012/20121206-windham-officer-involved-shooting.htm	Mirisola
NYQueens	2014-08-28 21:47:00	2012-10-12	NY - New York	Queens	New York	NYPD	Noel Polanco	22	Male	White	Hispanic or Latino origin	Hispanic	1	Killed	Unarmed	Unarmed	During traffic stop after chase, victim "failed to 'show his hands' and made a sudden reach toward the floor of the car." City settled for $2.5 million.	http://www.dnainfo.com/new-york/20140404/elmhurst/detective-who-killed-national-guardsman-noel-polanco-hit-with-nypd-charge	Hassan Hamdy	Yes	1	I've already requested to receive updates.				2012-10-04	2	No, I have an incident/more incidents to log.
PAAllegheny	2014-08-28 21:28:47	2012-10-12	PA - Pennsylvania	Allegheny	Pittsburgh	Pittsburgh PD	Tiant Mitchell	25	Male	Black or African American	Not of Hispanic or Latino origin	Black		Killed	Armed	Handgun	Victim fired at the officer, hitting him before officer returned fire.	http://www.policeone.com/Officer-Safety/articles/6010273-Officer-escapes-death-4th-time-this-year/	Andrew Baker	Yes	5	I've already requested to receive updates.				2012-10-12	1	No, I have an incident/more incidents to log.
PAAllegheny	2014-08-28 21:31:06	2012-10-12	PA - Pennsylvania	Allegheny	Pittsburgh	Pittsburgh PD	Shawnece Moore	36	Female	Black or African American	Not of Hispanic or Latino origin	Black		Hit	Unarmed	Unarmed	Bystander struck after her husband shot an an officer.	http://www.policeone.com/Officer-Safety/articles/6010273-Officer-escapes-death-4th-time-this-year/	Andrew Baker	Yes	4	I've already requested to receive updates.				2012-10-12	1	No, I have an incident/more incidents to log.
TXBexar	2014-08-20 14:21:46	2012-10-12	TX - Texas	Bexar	San Antonio	Bexar County Sheriff's Office	Christopher Mendez	25	Male	White	Hispanic or Latino origin	Hispanic		Hit	Armed	Handgun	10/15/2012 search, Called 911 to threaten police, pointed gun at deputies	http://www.mysanantonio.com/news/local_news/article/Bexar-sheriff-s-sergeant-shoots-kills-man-3947509.php
AKMatanuskaSusitnaBorou	2014-08-20 16:41:30	2012-10-13	AK - Alaska	Matanuska-SusitnaBorou	Wasilla	Alaska State Troopers	Nicholas Leo Frazier	22	Male	White	Not of Hispanic or Latino origin	White	2	Hit	Armed	Firearm; not stated	10/16/2012 search. Victim was shot after shooting trooper. He died shortly thereafter, though the coroner ruled that the trooper's shots were non-fatal and the cause of death of was a self-inflicted gunshot.	http://alaska-native-news.com/name-of-officer-involved-in-trunk-road-shooting-released-frazier-died-of-self-inflicted-wounds-6451	Andrew Ballestreros
TXHarris	2014-08-28 22:03:19	2012-10-13	TX - Texas	Harris	Houston	Houston PD	Kenneth Brian Releford	37	Male	Black or African American	Not of Hispanic or Latino origin	Black	2	Killed	Unarmed	Unarmed	Mentally Ill. Witnesses claim he had his hands in the air as he walked toward the officer, who told him to stop.	http://www.chron.com/news/houston-texas/article/HPD-officer-fatally-shoots-charging-man-near-3938741.php	J. Rosemon	Yes	2	I've already requested to receive updates.				2012-10-11	1	No, I have an incident/more incidents to log.
CASanDiego	2014-08-20 14:30:41	2012-10-14	CA - California	SanDiego	San Diego	San Diego PD	Esteban Nandin	25	Male	White	Hispanic or Latino origin	Hispanic		Hit	Armed	Rifle	10/15/2012 search, Police called to report of man walking around an apartment complex wearing a gas mask and carrying a rifle. Victim pointed rifle at officers.	http://www.utsandiego.com/news/2012/oct/15/navy-man-shot-police-downtown-identified/
OHHamilton	2014-08-20 16:46:07	2012-10-14	OH - Ohio	Hamilton	Cincinnati	Cincinnati PD	Erica Collins	26	Female	Black or African American	Not of Hispanic or Latino origin	Black	2	Killed	Armed	Knife or cutting instrument	10/16/2012 search. "According to witnesses Erica challenged the officer to shoot her and then moved in his direction. Erica then raised the knife at which point officer Latzy, in immediate fear of his life and safety, discharged his firearm twice striking Erica."	http://www.fox19.com/story/19817910/fox19-uncovers-details-on-officer-latzy-who-fatally-shot-woman	Matt Latzy
TNCumberland	2014-08-20 14:06:50	2012-10-14	TN - Tennessee	Cumberland		Cumberland County Sheriff's Office	David Fish	41	Male	White	Not of Hispanic or Latino origin	White		Killed	Unarmed	Unarmed	"Deputy Human was attempting to arrest David Lee Fish, II, 41, of Cumberland County, when an altercation occured. During the altercation, Deputy Human fired his weapon and Fish was shot."	http://www.local8now.com/home/headlines/Deputies-investigate-Cumberland-County-officer-involved-shooting-174268251.html	Jonathan Human
TXBexar	2014-08-20 14:20:04	2012-10-14	TX - Texas	Bexar	San Antonio	Bexar Conty Sheriff's Office	Jose Alberto Guerra	19	Male	White	Hispanic or Latino origin	Hispanic		Killed	Unarmed	Unarmed	Victim was approached for walking in street and acting erratically. During pat-down, "Antu said the teen attacked the sergeant and tried to shove him into oncoming traffic"	http://www.mysanantonio.com/news/local_news/article/Bexar-sheriff-s-sergeant-shoots-kills-man-3947509.php	Frank Bellino
CAVentura	2014-08-20 13:57:54	2012-10-15	CA - California	Ventura	Oxnard	Oxnard PD	Jose Zepeda, Jr	24	Male	White	Hispanic or Latino origin	Hispanic		Killed	Armed	Firearm; not stated	Killed after "chase" and "shootout" following "routine traffic stop"	http://losangeles.cbslocal.com/2012/10/15/innocent-bystander-may-have-been-killed-in-oxnard-officer-involved-shooting/
CAVentura	2014-08-20 13:59:10	2012-10-15	CA - California	Ventura	Oxnard	Oxnard PD	Justin Villa	24	Male	White	Hispanic or Latino origin	Hispanic		Hit	Armed	Firearm; not stated	Shot after "chase" and "shootout" following "routine traffic stop"	http://losangeles.cbslocal.com/2012/10/15/innocent-bystander-may-have-been-killed-in-oxnard-officer-involved-shooting/
CAVentura	2014-08-20 14:03:30	2012-10-15	CA - California	Ventura	Oxnard	Oxnard PD	Alfonso Limon	21	Male	White	Hispanic or Latino origin	Hispanic	16	Killed	Unarmed	Unarmed	INNOCENT BYSTANDER caught in crossfire between police and two armed suspects. Officers admitted intentionally firing at victim, mistaking him for another suspect. Police department paid out $6.7 million settlement to victim's family	http://losangeles.cbslocal.com/2012/10/15/innocent-bystander-may-have-
NCDavidson	2014-08-20 20:22:31	2012-10-15	NC - North Carolina	Davidson	Thomasville	Thomasville PD	Scott William Muntz	41	Male	White	Not of Hispanic or Latino origin	White		Killed	Armed	Handgun	Amending previous submission. Further research determined that victim died in the hospital two days later.	http://myfox8.com/2012/10/15/officer-involved-shooting-in-thomasville/		Yes
TXDenton	2014-08-20 16:47:20	2012-10-15	TX - Texas	Denton		Denton County Sheriff	Roberto Carlos Hernandez	21	Male	White	Hispanic or Latino origin	Hispanic		Killed	Armed	vehicle	10/16/2012 search. Victim was pulled over for speeding, refused to get out of the car, and reversed the car into the officer's vehicle.	http://www.nbcdfw.com/news/local/Deputy-Shoots-and-Kills-Suspect-during-Traffic-Stop-174446181.html
IAVanBuren	2014-08-20 16:24:50	2012-10-16	IA - Iowa	VanBuren	Cantril	Van Buren County Sheriff	Robert M Dooley	59	Male	White	Not of Hispanic or Latino origin	White	1	Killed	Armed	Rifle	Officers responded to multiple reports of a man with a gun walking along the highway. Victim ignored repeated requests to drop his weapon. Victim raised firearm toward the deputies.	http://www.heartlandconnection.com/news/story.aspx?id=813870#.U_TwTMVdVM4	Jon Tharp
NJUnion	2014-08-20 16:38:11	2012-10-16	NJ - New Jersey	Union	Linden	Piscataway PD	Christopher Desa	31	Male	White	Unknown	White		Hit	Armed	vehicle	Victim was armed robbery suspect. He was cornered by officers before trying to ram them and their vehicles with his truck. A gun was found to have been tossed from his vehicle.	http://www.nj.com/union/index.ssf/2012/10/police_shoot_armed_robbery_sus.html
OHStark	2014-08-20 20:45:38	2012-10-16	OH - Ohio	Stark	Lake Township	Lake Township PD	Jorge Duran, Jr	24	Male	White	Unknown	White		Killed	Armed	Handgun	Officers responded to call for shooting. Victim had just killed multiple people and exchanged fire with officers.	http://www.toledoblade.com/Police-Fire/2012/10/17/5-people-shot-during-domestic-situation-at-Lake-Township-apartment-complex.html		Yes
TXTyler	2014-08-20 21:38:56	2012-10-16	TX - Texas	Tyler	Woodville	Tyler County Sheriff	Dennis Ray Murray, Jr	40	Male	White	Not of Hispanic or Latino origin	White	12	Killed	Armed	Rifle	Officers responded to reports of a man making threats. Victim lead them on a chase and then brandished a rifle.	http://www.kfdm.com/shared/news/top-stories/stories/kwbb_tyler-county-deputies-shoot-kill-man-accused-pointing-rifle-at-them-firing-at-officer-2251.shtml		Yes
CALosAngeles	2014-08-20 20:29:22	2012-10-17	CA - California	LosAngeles	Inglewood	LA County Sheriff	Gilbert "Tito" Gutierrez	27	Male	White	Hispanic or Latino origin	Hispanic	1	Killed	Unarmed	Unarmed	Victim was in custody when he needed medical attention. At the hospital, he reached for an officer's gun and was shot and killed by a second officer.	http://www.dailynews.com/general-news/20121018/deputy-shoots-kills-man-during-struggle-for-gun-at-centinela-hospital-in-inglewood		Yes
CALosAngeles	2014-08-20 20:07:52	2012-10-17	CA - California	LosAngeles	Los Angeles	LAPD	Vanessa Acosta	26	Female	White	Hispanic or Latino origin	Hispanic		Hit	Armed	Firearm; not stated	Victim hit after a car chase in which gunfire was exchanged	http://latimesblogs.latimes.com/lanow/2012/10/1-dead-1-injured-after-police-chase-officer-involved-shooting-in-van-nuys.html		Yes
CALosAngeles	2014-08-20 20:48:33	2012-10-17	CA - California	LosAngeles	Los Angeles	LAPD	Steve Rombeau	22	Male	White	Not of Hispanic or Latino origin	White		Killed	Armed	Firearm; not stated	Amending previous submission with unknown man's name.	http://latimesblogs.latimes.com/lanow/2012/10/1-dead-1-injured-after-police-chase-officer-involved-shooting-in-van-nuys.html		Yes
CALosAngeles	2014-08-20 20:06:27	2012-10-17	CA - California	LosAngeles	Los Angeles	LAPD	unknown	22	Male	White	Hispanic or Latino origin	Hispanic		Killed	Armed	Firearm; not stated	Victim killed after a car chase in which gunfire was exchanged	http://latimesblogs.latimes.com/lanow/2012/10/1-dead-1-injured-after-police-chase-officer-involved-shooting-in-van-nuys.html
SCAnderson	2014-08-20 20:30:53	2012-10-17	SC - South Carolina	Anderson	Anderson	Anderson PD	Maurice Johnson	40	Male	Black or African American	Unknown	Black		Hit	Armed	Knife or cutting instrument	"Creamer said that when officers arrived, Johnson was cutting himself on the arm. He said officers told Johnson to drop the knife several times, but Johnson pointed the knife at officers and came toward them."	http://www.foxcarolina.com/story/19848737/man-shot-by-anderson-police-officer		Yes
SDMinnehaha	2014-08-20 20:27:58	2012-10-17	SD - South Dakota	Minnehaha	Sioux Falls	SD Highway Patrol, Lincoln County Sheriff	Rachel Coleman	25	Female	White	Not of Hispanic or Latino origin	White	23	Hit	Armed	vehicle	After a chase with police, Coleman was shot while attempting to run over several officers with her car.	http://atg.sd.gov/LinkClick.aspx?fileticket=-fL4CK-ourA%3D&tabid=442	Andrew Steen, Aaron Bartscher, Tom Krull	Yes
TXHarris	2014-08-20 21:40:07	2012-10-17	TX - Texas	Harris	Houston	Harris County Sheriff	Gerrit Perkins	37	Male	White	Not of Hispanic or Latino origin	White	1	Killed	Unarmed	Unarmed	Officers were serving a warrant for for assault. Victim "lunged" at officers with "shiny object" in his hand, which later turned out to be a phone.	http://abc13.com/archive/8850192/		Yes
FLMiamiDade	2014-08-20 21:37:46	2012-10-18	FL - Florida	MiamiDade	Miami	Miami-Dade PD	Jack Scott	56	Male	Black or African American	Not of Hispanic or Latino origin	Black	1	Hit	Unarmed	Unarmed	Officer was conducting a traffic stop when victim began throwing concrete blocks at her. He then started advancing toward the car she had pulled over and she shot him in the leg	http://www.huffingtonpost.com/2012/10/19/jack-scott-charles-woodson-arrested_n_1986537.html		Yes
CASolano	2014-08-20 16:43:25	2012-10-21	CA - California	Solano	Vallejo	Vallejo Police Department	Jeremiah Moore	29	Male	White	Unknown	White	1	Killed	Armed	Rifle	Officers arrived at 1:33 AM and saw a naked man run into the residence. Officers passed several vehicles with broken windows. Officers approached the residence, confronted a naked man inside, and then began trying to gain the man’s compliance. There was smoke visible in the residence. A second naked man then appeared from the back of the interior of the house with a rifle. The man with the rifle …	https://www.facebook.com/VallejoPD/posts/504026036283225	Sean Kenney
FLPalmBeach	2014-08-20 17:07:41	2012-10-29	FL - Florida	PalmBeach	West Palm Beach	West Palm Beach Police	Authneil Gavin	35	Male	Black or African American	Not of Hispanic or Latino origin	Black		Hit	Armed	Handgun	Undercover cop shot victim in a set up drug deal. The victim had a gun and shot at the cop but the firearm did not fire. The victim left the hospital that night and went to jail.	http://www.palmbeachpost.com/news/news/crime-law/men-allegedly-involved-in-undercover-drug-deal-tha/nSsNk/
MICalhoun	2014-08-20 14:37:30	2012-11-02	MI - Michigan	Calhoun	Bedford Township	Battle Creek Police Department	Matthew Wayne Daniels	24	Male	White	Not of Hispanic or Latino origin	White	1	Killed	Unarmed	Unarmed	Officers were called to the home of Matthew's mother and stepfather shortly before midnight for a domestic disturbance and requested by the relative who made the call to send 4-5 officers, as Matthew was about 6'5" and heavyset. Two officers, one male and one female, responded. The female officer was inside the house when the male officer shot Matthew in the chest and then refused to call for par…	http://www.battlecreekenquirer.com/article/20121103/NEWS01/311030012/Bedford-man-shot-killed-by-Battle-Creek-police-officer	Charles Pelfrey
WIDane	2014-08-20 12:58:49	2012-11-09	WI - Wisconsin	Dane	Madison	Madison Police	Paul Heenan	30	Male	White	Not of Hispanic or Latino origin	White	3	Killed	Unarmed	Unarmed	Heenan was drunk (.2 BAC) when he accidentally entered a neighbors home thinking it was his own. The neighbor called the police. When police arrived, Heenan apparently was confrontational. The police officer claims that Heenan went for his gun, resulting in officer Heimsness firing three rounds into Heenan's upper torso. Heimsness was later cleared of any wrongdoing, but the situation wreaks of b…	http://wisconsinwatch.org/2013/01/police-account-of-shooting-disputed/	Stephen Heimsness
CARiverside	2014-08-26 16:34:11	2012-11-10	CA - California	Riverside	Palm Springs	Palm Springs Police Department	Allen DeVillena	22	Male	White	Hispanic or Latino origin	Hispanic	6	Killed	Armed	Vehicle	Two bike officers heard yelling in a parking garage about 2 am. When confronted they recognized the driver of the car as an earlier suspect for disorderly conduct. The police officers instructed the victim to turn off the car but instead he took off and hit one officer with the other officer partially in the passenger window. both officers shot and killed the victim. The article notes "A witness …	http://www.desertsun.com/story/news/crime_courts/2014/08/05/allan-devillena-palm-springs-police-shooting/13625427/		Yes	3	I've already requested to receive updates.				2012-11-10	1	No, I have another incident to log.
PAYork	2014-08-22 12:37:52	2012-11-24	PA - Pennsylvania	York	York City	York City Police, West Manchester Township Police	Juan Bonilla, Jr.	21	Male	White	Hispanic or Latino origin	Hispanic	22	Hit	Armed	Handgun	Police responded to a fight at a club. Bonilla was spotted firing his gun at a vehicle leaving the bar. Both officers emptied their weapons firing 22 times at Bonilla hitting him twice and killing him.	http://www.documentcloud.org/documents/1008053-press-release-death-of-juan-bonilla-jr.html#document/p1	Christopher Roosen, Michael Jordan	Yes	4	I've already requested to receive updates.
WIMilwaukee	2014-08-22 12:17:07	2012-11-24	WI - Wisconsin	Milwaukee	Milwaukee	Milwaukee Police Department	Daniel J. Kleinmann	28	Male	White	Unknown	White		Killed	Unarmed	Unarmed	Officer Pecoraro responded to a 911 call for an armed robbery and spotted the suspect, Kleinmann, running so he started chasing after him. Chief Flynn says the interaction between the two made Pecoraro fear for his life so he fatally shot Kleinmann. The officer said the suspect pointed what looked like a gun at him and the officer fired. Chief Flynn says investigators did not find a weapon.	http://www.cbs58.com/news/top-stories/Investigators-find-no-weapon-after-deadly-officer-involved-shooting-180914871.html?m=y&smobile=y#	Shawn Pecoraro	Yes	2	I've already requested to receive updates.
CALosAngeles	2014-08-27 22:13:40	2012-12-01	CA - California	LosAngeles	Van Nuys	LAPD	Jeovany Mendoza	18	Male	Unknown	Hispanic or Latino origin	Hispanic		Killed	Armed	Knife or cutting instrument	Officers responding to a call find the victim holding a knife to a woman's throat, shoot him in the face, fatally.	http://homicide.latimes.com/post/jeovany-mendoza/		Yes	5	I've already requested to receive updates.				2012-12-01	2	No, I have an incident/more incidents to log.
CAOrange	2014-08-27 22:03:58	2012-12-01	CA - California	Orange	Seal Beach	Garden Grove Police Dept.	Matthew Scott Lane	35	Male	White	Unknown	White	6	Killed	Armed	Knife or cutting instrument	Lane violated restraining order by visiting home of ex-wife, fled in possibly stolen car, police give chase, eventually Lane abandons vehicle, flees on foot to a gas station and attempts to steal another car. While in the driver seat he is shot 6 times by officer Coulter who believes Lane to have been reaching for a weapon.	http://www.orangecountyda.com/docs/lane.pdf	Gary Coulter	Yes	3	Add me!	Richard Fleming	donflan@yahoo.com	@walkingtogitmo	2012-12-01	1	This is the first incident I am logging.
IALinn	2014-08-20 14:43:50	2012-12-04	IA - Iowa	Linn	Cedar Rapids	Cedar Rapids Police	Desirae Daniel	27	Female	White	Unknown	White	9	Killed	Armed	Handgun	Officers attempted to pull over a car after many attempts to get the driver to stop she finally did. When approaching the car they saw her reach for something. They saw a gun and both fired a total of nine rounds. Killing the suspect.	http://archive.org/stream/608336-desirae-daniel-report/608336-desirae-daniel-report_djvu.txt	Mitchell Magill, Adrienne Phelps
CASanDiego	2014-08-20 14:33:12	2012-12-05	CA - California	SanDiego	El Cajon	California Highway Patrol	Anthony Osorio	27	Male	White	Hispanic or Latino origin	Hispanic	33	Killed	Unarmed	Unarmed	After a high speed chase Osorio rolled his suv. Getting out of the car he was ordered to get down. He reached behind his back and officers fired 33 times with 18 bullets hitting the suspect.	http://www.nbcsandiego.com/news/local/CHPs-Fatal-Shooting-of-Driver-Recorded-on-Dashcam-182256521.html	David Bigalk, Ryan Harrison, Phillip Jones
CALosAngeles	2014-08-20 14:12:53	2012-12-06	CA - California	LosAngeles	Hollywood	Los Angeles Police Department	Carlos Carrillo	26	Male	White	Hispanic or Latino origin	Hispanic		Killed	Armed	Knife or cutting instrument	Police were called to a domestic violence situation. The suspect rushed the officers with a 4-inch bladed knife. Officers fired and killed him.	http://www.lapdonline.org/newsroom/news_view/52520	adam urena
TXDallas	2014-08-20 14:17:37	2012-12-06	TX - Texas	Dallas	Dallas	Dallas Police	Robert Williams	37	Male	White	Not of Hispanic or Latino origin	White		Killed	Armed	Shotgun	Suspect was carrying a shotgun and was called on to drop his weapon. He raised the weapon and was shot by the police and killed. he had multiple previous drug charges on his record.	http://www.wfaa.com/news/local/dallas/Dallas-police-on-scene-at-officer-involved-shooting-in-Pleasant-Grove-182444771.html
FLPalmBeach	2014-08-20 17:15:48	2012-12-12	FL - Florida	PalmBeach	Singer Island	Palm Beach Shores Police	Adam Brown	45	Male	White	Not of Hispanic or Latino origin	White		Hit	Armed	Firearm; not stated	Naked man aimed gun at police officers and ignored their request to put the gun down.	http://www.palmbeachpost.com/news/news/authorities-on-scene-of-police-involved-shooting-i/nTS4p/
FLPalmBeach	2014-08-20 16:48:48	2012-12-13	FL - Florida	PalmBeach	West Palm Beach	Palm Beach County Sheriff	Claude Devin Jolicouer III	17	Male	Black or African American	Not of Hispanic or Latino origin	Black		Killed	Unarmed	Unarmed	Was the passenger in a car which was pulled over and they were being questioned by the cops. One of the passengers in the car tried to escape and had a gun. The victim did not have a weapon.	http://www.palmbeachpost.com/news/news/crime-law/one-person-dead-tonight-after-shooting-in-suburban/nTWRj/
MNRamsey	2014-08-20 13:38:19	2012-12-17	MN - Minnesota	Ramsey	St. Paul	St. Paul Police	Melvin D. Fletcher, Jr.	20	Male	Black or African American	Unknown	Black	2	Killed	Armed	Firearm; not stated	Shot in the back while fleeing from police after an attempted robbery on a grocery store	http://www.twincities.com/crime/ci_24422150/grand-jury-returns-no-indictment-police-shooting-would	Theodore Mackintosh; Jeffrey Thissen
UTSaltLake	2014-08-21 09:01:49	2012-12-20	UT - Utah	SaltLake	Taylorsville	Unified Police Department	Jose Luis Rodriguez-Castro	32	Male	Unknown	Hispanic or Latino origin	Hispanic		Killed	Armed	Knife or cutting instrument	The victim was holding his girlfriend at knifepoint in her car when Officer Lloyd approached the vehicle and tried talking to him. Victim told officer to go away and said he was going to die and his girlfriend got hysterical. When a 2nd officer arrived, victim grabbed his girlfriend and got in the back seat with knife pressed to her neck. Officer ordered victim to drop his knife several times lou…	http://www.sltrib.com/sltrib/news/55659458-78/castro-rodriguez-lloyd-martinez.html.csp	Officer Scott Lloyd	Yes
CAShasta	2014-08-26 10:33:55	2012-12-25	CA - California	Shasta	Cottonwood	California Highway Patrol	William Kinyon	48	Male	White	Not of Hispanic or Latino origin	White		Hit	Armed	Handgun	Kinyon led officers on a high speed chase when they tried to pull him over. Kinyon admitted that he fired at officers until the clip in his pistol was empty. Kinyon was treated for his gunshot wounds and then booked into jail	http://www.krcrtv.com/news/local/getting-the-facts-officerinvolved-shootings-in-the-northstate/23598718		Yes	4	I've already requested to receive updates.				2012-12-04	3	No, I have another incident to log.
WAKing	2014-08-29 10:55:20	2012-12-25	WA - Washington	King	Seattle	Seattle Police Department	Leonid Kalyuzhnyy	51	Male	White	Not of Hispanic or Latino origin	White	2	Killed	Armed	Rifle	Officers responded to gunshot call, when they arrived at the building a woman ran out yelling “He’s got a gun and he’s threatening to kill me”, the victim appeared soon after that, brandishing a rifle. Victim fired at least one shot at police and yelled at officers that he was going to kill them before he was fatally shot by officers	http://seattletimes.com/html/localnews/2022364987_policeshootingxml.html		Yes	4	I've already requested to receive updates.				2013-11-29	5	No, I have an incident/more incidents to log.
CARiverside	2014-08-29 18:50:51	2012-12-31	CA - California	Riverside	Moreno Valley	Riverside County Sheriff's Department	Lamon Khiry Haslip	18	Male	Black or African American	Not of Hispanic or Latino origin	Black	1	Killed	Armed	Handgun	According to a press release by the sheriff's department, officers had been dispatched to Fir Avenue in Moreno Valley on a call about a gang-related "man with a gun" that came in at 8:38 p.m. Friday. The caller said “several males” were in front of a residence “creating a disturbance and brandishing guns." The suspects fled in a vehicle before police arrived, but a vehicle carrying Haslip drove b…	http://latimesblogs.latimes.com/lanow/2012/12/handcuffed-man-shot-in-moreno-valley-is-identified.html	Unidentified deputy	Yes	2	I've already requested to receive updates.				2012-12-21	4	No, I have an incident/more incidents to log.
KYFranklin	2014-08-29 17:43:27	2012-12-31	KY - Kentucky	Franklin	Frankfort	Frankfort Police Department	Gary Meadows	55	Male	White	Not of Hispanic or Latino origin	White	2	Hit	Armed	Handgun	A woman called 911 at 9:45PM on 12/30/12, saying an armed man had her trapped inside her home. Officers arrived and made contact with her by phone, and she told them she had locked herself in another part of the house. Tactical response unit and a hostage negotiator showed up, trying to get Meadows to put down the gun and come out of the house. Police stated that at some point, Meadows suddenly c…	http://www.state-journal.com/latest%20headlines/2012/12/31/frankfort-police-shoot-kill-man-during-standoff	Todd Smither and Bill Graves	Yes	5	Add me!	Glenn Bristol	yesandmyhat@gmail.com		2012-12-30	1	This is the first incident I am logging.
PAYork	2014-08-29 20:18:09	2012-12-31	PA - Pennsylvania	York	York	Springettsbury Township Police	Todd William Shultz	40	Male	White	Not of Hispanic or Latino origin	White	2	Killed	Armed	Knife or cutting instrument	Shultz was shot and killed at a Kmart, after officers responded for a report of a man stealing jewelry and in possession of a knife. Shultz fought with officers, continued to struggle after police used a stun gun, and then pulled a knife, police said. York County District Attorney Tom Kearney said on Wednesday that he has cleared the officers involved to go back on duty. Kearney said he reviewed …	http://www.ydr.com/ci_22284971/lawyer-kmart-suspect-mild-mannered	Four unnamed officers.	Yes	4	I've already requested to receive updates.				2014-12-29	8	No, I have an incident/more incidents to log.
COPueblo	2014-08-20 13:48:12	2013-01-01	CO - Colorado	Pueblo	Pueblo	Pueblo Police Department	Christopher Tavares	21	Male	Black or African American	Not of Hispanic or Latino origin	Black		Killed	Armed	Firearm; not stated	Just after 3 a.m., officers were investigating in the area of 11th and Greenwood streets after hearing gunfire. They came across suspicious vehicle which took off. The officers were in pursuit when the suspect's vehicle crashed and the officers stated that Taveres aimed his gun at an officer and shot him in the shoulder. Taveres took off but officers found him. He was shot and killed after he ref…	http://www.krdo.com/news/Pueblo-Police-shoot-kill-man-suspected-of-shooting-officer/17963954
FLMiamiDade	2014-08-20 19:02:54	2013-01-04	FL - Florida	MiamiDade	Kendall	Miami-Dade PD	Xavier Tyrell Johnson	31	Male	Black or African American	Unknown	Black		Killed	Unarmed	Unarmed	Xavier Tyrell Johnson, 31, and Yolanda Thomas, 34, were shot and killed after allegedly stealing from a drugstore and fleeing. Suspects drove 20 blocks before crashing car into barricade. Police surrounded vehicle and felt threatened by vehicle, opening fire. Other link is http://blogs.miaminewtimes.com/riptide/2013/01/deadly_police-involved_shootin.php	http://miami.cbslocal.com/2013/01/07/family-of-man-killed-in-police-involved-shooting-demands-answers/
FLMiamiDade	2014-08-20 19:06:54	2013-01-04	FL - Florida	MiamiDade	Kendall	Miami-Dade PD	Yolanda Thomas	34	Female	Black or African American	Unknown	Black		Killed	Unarmed	Unarmed	Xavier Tyrell Johnson, 31, and Yolanda Thomas, 34, were shot and killed Friday after allegedly stealing from a drugstore and fleeing. Suspects drove 20 blocks before crashing car into barricade. Police surrounded vehicle, felt threatened & opened fire. Other link: http://blogs.miaminewtimes.com/riptide/2013/01/deadly_police-involved_shootin.php	http://miami.cbslocal.com/2013/01/07/family-of-man-killed-in-police-involved-shooting-demands-answers/
SCGreenville	2014-08-20 14:51:24	2013-01-14	SC - South Carolina	Greenville	Greenville	Greenville County Sheriff's Office & Greenville Police Dept.	Wesley Kyle Swilling	31	Male	White	Unknown	White	24	Killed	Armed	Toy/fake/non-lethal gun	Around 3 a.m., Swilling was in the parking lot of the Greenville Co. Law Enforcement Ctr. and yelled threats to an officer walking by. The officer went to a deputy for assistance, and the two approached Swilling. They said Swilling acted aggressively and appeared to have a weapon. When Swilling began moving toward them, the officer and deputy fired. Swilling was shot 7 times. It was later determi…	http://www.foxcarolina.com/story/21629214/solicitor-officer-deputy-wont-face-charges-in-lec-shooting
UTSaltLake	2014-09-09 21:07:35	2013-01-22	UT - Utah	SaltLake	west valley city	West Valley City Police Dept	Danielle Willard	21	Female	White	Not of Hispanic or Latino origin	White	1	Killed	Unarmed	Unarmed	They officers claims she was involved in a drug deal and she got into her subaru and backed out. The officers felt they were in danger because of the path of her direction so they fired at her. One shot in the head killed her. Never had a weapon and two years later nobody has been arrested. The officers were fired for having cash and drugs from the evidence lockup in their car.	http://www.deseretnews.com/article/865566011/Shooting-victim-battled-drugs-Many-questions-unanswered-by-police.html?pg=all	Shaun Cowley	Yes	1	No thanks.				2012-11-02	1	This is the first incident I am logging.
NMSanJuan	2014-08-22 01:41:24	2013-01-23	NM - New Mexico	SanJuan	Farmington	Farmington police	Daniel Rey	33	Male	White	Unknown	White		Killed	Armed	"Large edged weapon"	Police responded to a domestic violence call. Victim was striking a woman and "breaking everything in the house". Victim failed to drop the weapon (the type of which has not been disclosed) and was shot and killed.	http://www.daily-times.com/ci_22431944/state-police-identify-suspect-officer-involved-shooting		Yes	5
TXCherokee	2014-08-22 01:23:31	2013-01-23	TX - Texas	Cherokee	Alto	Alto Police	James Eric Griffin	48	Male	Black or African American	Not of Hispanic or Latino origin	Black	8	Killed	Armed	Knife or cutting instrument	Victim stole a pack of cigarettes from an Alto Pic-N-Go by brandishing a machete. Officer was dispatched to the scene, where a video shows victim confronting the officer with a machete knife. Officer yelled "put that knife down" and then fired 8 shots at victim, killing him.	https://www.youtube.com/watch?v=AKEUXBhhTes	Brandon Michael Smith	Yes	4
LASt.JohntheBaptistPa	2014-08-22 00:34:45	2013-01-24	LA - Louisiana	St.JohntheBaptistPa	LaPlace	St. John the Baptist Sheriff's Office	Barbara Lassere	60	Female	Black or African American	Not of Hispanic or Latino origin	Black	4	Killed	Armed	Handgun	Officer pulled victim over for headlight-related traffic violation without turning on lights or siren. Victim refused to get out of the car when stopped and brandished a revolver. Victim then drove to their parent's home, resulting in a slow-speed chase, refused to get out of the car again, and fired at the officer. Officer returned fire, killing the victim. A witness heard four shots. Family mem…	http://www.nola.com/crime/index.ssf/2013/01/60-year-old_woman_fatally_shot.html	Steven Daley	Yes	1
MIKalamazoo	2014-08-22 00:56:55	2013-01-24	MI - Michigan	Kalamazoo	Kalamazoo	Kalamazoo Public Safety	Jacob Grassley	34	Male	White	Not of Hispanic or Latino origin	White	3	Killed	Unarmed	Unarmed	Victim was a suspect for domestic violence incident, and was tracked via cell phone by police. Police attempted to pull victim over, but victim led them on a short vehicle pursuit until stopped by spike strips. Victim fled to the lobby of a nearby Best Western where he "failed to comply with officers' commands" and was shot dead. Three gunshots were heard by nearby witnesses (a high school figure…	http://www.mlive.com/news/kalamazoo/index.ssf/2013/01/kalamazoo_man_killed_by_police.html#incart_river_default		Yes	1
NCCumberland	2014-08-22 01:10:34	2013-01-24	NC - North Carolina	Cumberland	Fayetteville	Fayetteville Police Department	Nijza Lamar Hagans	22	Male	Black or African American	Not of Hispanic or Latino origin	Black		Killed	Armed	Handgun	Police attempted to pull over victim for a traffic stop. Victim kept driving until reaching a dead end and then stopped. During the stop, the officer shot victim, who died at the scene. Officers claim only to have seen a gun on the victim. No mention was made of any threatening moves made by the victim. There is very little in Google-able news for this story. Accounts vary from there being crack-…	http://www.wral.com/fayetteville-police-investigating-officer-involved-shooting/12019028/	Aaron Hunt	Yes	1
TXTarrant	2014-08-22 00:49:54	2013-01-24	TX - Texas	Tarrant	Fort Worth	Grand Prairie and Arlington police	Jordan Hatcher	22	Male	White	Not of Hispanic or Latino origin	White	4	Killed	Unarmed	Unarmed	Victim was a felony theft suspect and led police on a chase from a target into the nearby Tarrant County College parking lot. There, the officers attempted to taze the victim. The police account is that the victim fought with the officers and grabbed the stun gun from the officer, at which point the officer shot the victim four times, killing him. A pending lawsuit alleges that the victim had bee…	http://www.nbcdfw.com/news/local/Officer-Involved-Shooting-at-TCC-188279961.html	Wesley Bement	Yes	1
WAClark	2014-08-20 16:28:50	2013-01-25	WA - Washington	Clark	Vancouver	Clark County Sheriffs Office	Douglas E. Combs	16	Male	White	Hispanic or Latino origin	Hispanic	4	Hit	Unarmed	Unarmed	They could've used less lethal force, he wasn't armed, and they had him staked out, fucking police. He was one of my best friends at the time, and he always will be.	http://www.columbian.com/news/2013/jan/26/police-shoot-kill-robbery-suspect-16/	Cpl. Marshall Henderson
LASt.MaryParish	2014-08-25 15:16:58	2013-01-26	LA - Louisiana	St.MaryParish	Charenton	St. Mary Parish Sheriff's Office	Wilbert Thibodeaux	48	Male	Black or African American	Not of Hispanic or Latino origin	Black	1	Hit	Armed	Shotgun	Thibodeaux was shot after shooting 3 police officers, killing one. He is alleged to have killed another man before setting his trailer on fire, which is what the police arrived in response to.	http://www.nbc33tv.com/news/your-stories/charenton-community-speak	Rick Riggenbach	Yes	5	I've already requested to receive updates.				2013-01-26	1
CALosAngeles	2014-08-28 12:31:40	2013-01-27	CA - California	LosAngeles	Culver City	Los Angeles County Sheriff's Office	Jose de la Trinidad	36	Male	White	Hispanic or Latino origin	Hispanic	7	Killed	Unarmed	Unarmed	Suspect was shot and killed by deputies after exiting vehicle during a traffic stop. Police say he "reached for his waist" where he could have had a weapon concealed. He was shot 7 times from behind.	http://latimesblogs.latimes.com/lanow/2013/01/sheriff-deputies-shot-man-in-back-autopsy-report.html		Yes	1	I've already requested to receive updates.				2012-11-10	1	No, I have an incident/more incidents to log.
OHHamilton	2014-08-28 12:33:59	2013-01-27	OH - Ohio	Hamilton	Cincinnati	Cincinnati PD	Dontez O'Neal	19	Male	Black or African American	Not of Hispanic or Latino origin	Black	4	Killed	Armed	Handgun	O'Neal was shot and killed by police after an undercover drug sting went bad. "Whalen said the driver, later identified as O'Neal, attempted to reverse at high speed but crashed into a parked car, setting off the airbags inside the suspects' vehicle. "O'Neal opened his door and took a covered position, Whalen said, and fired one shot from a .45-caliber handgun at the officer. Whalen said Smith fi…	http://www.wlwt.com/news/local-news/cincinnati/Police-Suspect-pointed-gun-at-officer-before-fatal-shooting/17527842#!bLKPSz		Yes	5	I've already requested to receive updates.				2012-11-21	1	No, I have an incident/more incidents to log.
CAFresno	2014-08-20 13:30:28	2013-01-28	CA - California	Fresno	Fresno	Fresno County Sheriff's Office	Randall Lee Davis	51	Male	White	Not of Hispanic or Latino origin	White	2	Killed	Armed	Knife or cutting instrument	Suicide by cop. 2 officers fired, neither name disclosed.	http://abclocal.go.com//story?section=news/local&id=8971476
COTeller	2014-08-29 16:43:30	2013-01-29	CO - Colorado	Teller	Woodland Park	Woodland Park PD	Craig Bondo	20	Male	Black or African American	Not of Hispanic or Latino origin	Black	3	Killed	Armed	Vehicle	Bondo was suspected of stealing a car and was attempted to be pulled over outside Wal-Mart. "Bondo reportedly hit one of the officers with the vehicle while trying to escape. This led the other officer, who was standing directly behind the vehicle, to open fire, according to eyewitness reports. Officials believe that only one of the officers fired shots at the suspect’s vehicle. “One of the offic…	http://www.mountainjackpot.com/2013/01/29/police-shooting-startles-community-shuts-down-main-highway/		Yes	2	I've already requested to receive updates.				2013-01-22	3	No, I have an incident/more incidents to log.
FLDuval	2014-08-29 16:45:04	2013-01-29	FL - Florida	Duval	Jacksonville	Jacksonville Sheriff's Office	Anthony Dwayne Harris	38	Male	Black or African American	Not of Hispanic or Latino origin	Black	7	Killed	Unarmed	Unarmed	Harris got into an altercation with his 17-year-old son, leading to police being called, and allegedly reached for officer's weapon while resisting being handcuffed.	http://springfield.firstcoastnews.com/news/news/87443-jso-man-fatally-shot-police-had-criminal-past	Kevin Kilcoin, Scott Williams	Yes	1	I've already requested to receive updates.				2013-01-28	4	No, I have an incident/more incidents to log.
MOHolt	2014-08-29 16:52:50	2013-01-29	MO - Missouri	Holt	Craig	Missouri Highway Patrol	Thomas Schroeder	50	Male	White	Not of Hispanic or Latino origin	White		Killed	Unarmed	Personal weapon (hands, fists, feet, etc.)	Schroeder was shot after resisting arrest during a DUI traffic stop.	http://www.ketv.com/news/Man-fatally-shot-by-trooper/18347328#!bMr84h		Yes	1	I've already requested to receive updates.				2013-01-28	8	No, I have an incident/more incidents to log.
NCCatawba	2014-08-29 16:29:00	2013-01-29	NC - North Carolina	Catawba	Catawba County	Catawba County Sheriff's Office	Angie Hall	32	Female	White	Not of Hispanic or Latino origin	White	2	Killed	Armed	Handgun	Hall was shot after pointing a gun at deputies outside her home. Police had been summoned by family members who said she attempted to shoot her children before threatening to kill herself.	http://www.wsoctv.com/news/news/local/police-woman-shot-killed-officer-involved-shooting/nT9K6/	Dennis Smith	Yes	5	I've already requested to receive updates.				2013-01-29	1	This is the first incident I am logging.
NCMecklenburg	2014-08-29 16:39:35	2013-01-29	NC - North Carolina	Mecklenburg	Charlotte	Charlotte Mecklenburg PD	Spencer Mims, III	55	Male	White	Not of Hispanic or Latino origin	White	3	Killed	Armed	Knife or cutting instrument	Mims was shot after threatening Donaldson with a box cutter. Mims was mentally ill and his father, who he lived with, had ask for police assistance to enter the house.	http://www.crimeincharlotte.com/da-concludes-review-of-officer-involved-shooting-1062012/#.VADPn_ldWCk	J.B. Donaldson	Yes	2	I've already requested to receive updates.				2013-01-06	2	No, I have an incident/more incidents to log.
OKMayes	2014-08-29 16:36:19	2013-01-29	OK - Oklahoma	Mayes	Pryor	Mayes County Sheriff's Office & Salina PD	William Joseph Perneau	29	Male	White	Not of Hispanic or Latino origin	White	4	Killed	Armed	Handgun	Perneau was shot while handcuffed after somehow removing a handgun from waistband of his pants and shooting at officers.	http://www.tulsaworld.com/archives/report-man-shot-by-officer-had-meth-amphetamine-in-system/article_a1fd4a0b-51f3-5795-9338-3c8137dcff2b.html		Yes	2	I've already requested to receive updates.				2013-01-29	1	No, I have an incident/more incidents to log.
PAWyoming	2014-08-29 16:51:09	2013-01-29	PA - Pennsylvania	Wyoming	Tunkhannock Twp	Tunkhannock Twp PD	Brian P. Williams	42	Male	White	Not of Hispanic or Latino origin	White		Killed	Armed	Blunt object (clubs, hammers, etc.)	Williams was shot after swinging a fireplace poker at officers who were trying to serve him with a mental health warrant.	http://citizensvoice.com/news/da-cop-who-fatally-shot-lake-winola-man-won-t-be-prosecuted-1.1436050	Mark Papi	Yes	2	I've already requested to receive updates.				2012-11-07	6	No, I have an incident/more incidents to log.
TXTarrant	2014-08-29 16:41:41	2013-01-29	TX - Texas	Tarrant	Arlington	Grand Prairie PD & Arlington PD	Jordan Ross Hatcher	22	Male	White	Not of Hispanic or Latino origin	White	3	Killed	Unarmed	Unarmed	After a theft reported at Target, Hatcher got into an altercation with police, gained control of one of the officers' Tasers, and was shot and killed.	http://collegian.tccd.edu/?p=7488		Yes	2	I've already requested to receive updates.				2013-01-24	3	No, I have an incident/more incidents to log.
TXTarrant	2014-08-29 16:30:57	2013-01-29	TX - Texas	Tarrant	Haltom City	Haltom City PD	Cody Ira Loron	32	Male	White	Not of Hispanic or Latino origin	White	6	Killed	Armed	Handgun	Loron was killed after shooting at police officers, striking Bell 3 times. Loron had been pursued on a drug warrant, left his vehicle, and was hiding in another vehicle when he was found, and a shootout ensued. The original story says that another person at the scene was also killed, but I can't find any reference to that in subsequent reports.	http://crimeblog.dallasnews.com/2013/01/police-officer-shot-another-person-killed-in-haltom-city-shootout.html/	John Bell	Yes	5	I've already requested to receive updates.				2013-01-29	1	No, I have an incident/more incidents to log.
WAClark	2014-08-29 16:34:39	2013-01-29	WA - Washington	Clark	Vancouver	US Marshals Fugitive Task Force	Jesse J. France	29	Male	White	Not of Hispanic or Latino origin	White		Killed	Armed	Handgun	"""Jesse J. France, 29, was killed as members of the multiagency U.S. Marshals Fugitive Task Force arrived at his apartment complex to serve a felony arrest warrant. France reportedly rammed his car into an unmarked police car when officers tried to arrest him in the 7500 block of Northeast 18th Avenue. After France ""escalated"" the situation, officers fired shots at him, Vancouver police said. …	http://www.oregonlive.com/clark-county/index.ssf/2013/01/felon_shot_and_killed_by_polic.html		Yes	3	I've already requested to receive updates.				2013-01-18	1	No, I have an incident/more incidents to log.
CAVentura	2014-09-03 13:12:48	2013-01-30	CA - California	Ventura	Fillmore	Ventura County Sheriff's Office	Josue Jimenez	33	Male	White	Hispanic or Latino origin	Hispanic		Killed	Armed	Handgun	Jimenez was shot after being confronted by police, drawing his weapon, and shooting a pit bull terrier. He'd been reported as being outside a school with the gun.	http://latimesblogs.latimes.com/lanow/2013/01/man-kills-dog-and-is-killed-by-deputy.html		Yes	4	I've already requested to receive updates.				2013-01-30	7	No, I have an incident/more incidents to log.
FLOrange	2014-09-03 12:58:22	2013-01-30	FL - Florida	Orange	Orlando	Orlando PD	Karvis Jabbar Gamble		Male	Black or African American	Not of Hispanic or Latino origin	Black	5	Killed	Armed	Handgun	"""According to police, members of the drug enforcement team went to the home to investigate a drug-related complaint about 6:30 p.m. A police spokesman said officers knocked at the door of the house and one man stepped outside. ""At the same time, while the door was open, a subject sitting inside the front room immediately reached for a handgun, pulled it up and started pointing it at the office…	http://www.wftv.com/news/news/local/police-scene-possible-shooting-near-downtown-orlan/nTygt/		Yes	3	I've already requested to receive updates.				2013-01-30	1	No, I have an incident/more incidents to log.
FLOrange	2014-09-03 12:59:36	2013-01-30	FL - Florida	Orange	Orlando	Orlando PD	Cordaryl Leonjermane Wilson	25	Male	Black or African American	Not of Hispanic or Latino origin	Black	5	Hit	Armed	Handgun	"""According to police, members of the drug enforcement team went to the home to investigate a drug-related complaint about 6:30 p.m. A police spokesman said officers knocked at the door of the house and one man stepped outside. ""At the same time, while the door was open, a subject sitting inside the front room immediately reached for a handgun, pulled it up and started pointing it at the office…	http://www.wftv.com/news/news/local/police-scene-possible-shooting-near-downtown-orlan/nTygt/		Yes	3	I've already requested to receive updates.				2013-01-16	1	No, I have an incident/more incidents to log.
IDKootenai	2014-09-03 13:09:37	2013-01-30	ID - Idaho	Kootenai	Coeur d'Alene	Coeur d'Alene PD		41	Male	White	Not of Hispanic or Latino origin	White		Hit	Unarmed	Unarmed	Suspect was shot after fleeing in his vehicle after being busted in an undercover drug sting. He "evaded and aggressed" at officers with his vehicle.	http://www.kxly.com/news/north-idaho-news/Drug-bust-leads-to-shooting-near-Coeur-d-Alene-Casino/18058910		Yes	2	I've already requested to receive updates.				2013-01-29	4	No, I have an incident/more incidents to log.
NCNewHanover	2014-09-03 13:11:17	2013-01-30	NC - North Carolina	NewHanover	Wilmington	Wilmington PD	Jermaine Junior Cordova	36	Male	Black or African American	Not of Hispanic or Latino origin	Black		Hit	Armed	Handgun	Cordova was struck in the leg by a bullet "likely was from an officer's weapon" after breaking away from police, producing a handgun, and exchanging fire during a traffic stop.	http://portcitydaily.com/2013/01/31/police-standoff-suspects-bullet-wound-likely-was-from-an-officers-weapon/		Yes	4	I've already requested to receive updates.				2013-01-29	7	No, I have an incident/more incidents to log.
NJPassaic	2014-09-03 13:04:42	2013-01-30	NJ - New Jersey	Passaic	Paterson	Paterson PD	Salvador del Rosario	39	Male	White	Hispanic or Latino origin	Hispanic	2	Killed	Armed	Blunt object (clubs, hammers, etc.)	Del Rosario was shot in his bedroom by officers who were called to the scene because he wouldn't take his epilepsy medicine. He charged at officers with a hammer.	http://www.northjersey.com/news/tense-police-situation-in-paterson-turned-deadly-in-split-second-1.440936	Marj Kush	Yes	1	I've already requested to receive updates.				2012-09-01	2	No, I have an incident/more incidents to log.
OHWood	2014-09-03 13:06:25	2013-01-30	OH - Ohio	Wood	Perrysburg	Perrysburg Twp PD	James Newman	30	Male	White	Not of Hispanic or Latino origin	White		Hit	Unarmed	Unarmed	A suspected burglar fled into the woods and was shot when he emerged.	http://www.toledoblade.com/Police-Fire/2013/01/29/Perrysburg-Township-police-investigate-shooting.html	Jack Otte	Yes	1	I've already requested to receive updates.				2013-01-30	4	No, I have an incident/more incidents to log.
TNShelby	2014-09-03 12:49:26	2013-01-30	TN - Tennessee	Shelby	Memphis	Memphis PD	Steven Askew	24	Male	Black or African American	Not of Hispanic or Latino origin	Black	9	Killed	Armed	Handgun	"Memphis police were dispatched to the apartment complex at Knight Arnold and Mendenhall around 9:50 p.m. Thursday on a loud music disturbance call. When officers arrived, they said they saw a man slumped over the wheel in his car and they went to check on the man. According to Memphis police Sgt. Alyssa Macon-Moore, the man then pulled out a gun. Officers immediately opened fire, killing him."	http://wreg.com/tag/steven-askew/	Ned Aufdenkamp, Matthew Dyess	Yes	2	I've already requested to receive updates.				2013-01-17	1	No, I have an incident/more incidents to log.
TNShelby	2014-09-03 13:07:58	2013-01-30	TN - Tennessee	Shelby	Memphis	Memphis PD	Bo Moore	18	Male	Black or African American	Not of Hispanic or Latino origin	Black		Hit	Armed	Handgun	Moore was shot after pointing a gun at officers who'd been called to the scene of an armed robbery at a convenience store.	http://www.localmemphis.com/mostpopular/story/MPD-Names-Officer-in-Suspected-Robbers-Shooting/d/story/Y5AFpqGbZkK3Z4n6KyiQJg	Christopher Ross	Yes	4	I've already requested to receive updates.				2013-01-23	4	No, I have an incident/more incidents to log.
CTFairfield	2014-08-22 12:47:16	2013-01-31	CT - Connecticut	Fairfield	Bridgeport	Bridgeport PD	Michael Stinson	35	Male	Black or African American	Not of Hispanic or Latino origin	Black	12	Hit	Armed	Knife or cutting instrument	Police say a University of Bridgeport security guard reported seeing Stinson break into an unmarked police car. He was chased by officers and, police say, slashed at them with a large knife. Police say he was shot with a stun gun with no visible effect.	http://articles.courant.com/2013-02-01/news/hc-bridgeport-officer-fires-shots-0201-2-20130131_1_bridgeport-police-chief-joseph-l-gaudett-state-police	Brian Fitzgerald, Mark Belinkie	Yes	3	Add me!	Joel Gillespie	joel.gillespie@gmail.com	@schwinnsuburban
FLLeon	2014-08-27 10:25:55	2013-01-31	FL - Florida	Leon	Tallahassee	Leon County Sheriff's Office	Carlos Manuel Cespedes	31	Male	White	Hispanic or Latino origin	Hispanic		Hit	Armed	Handgun	When deputies attempted to stop Cespedes, he fled in a silver Pontiac Vibe. Deputies pursued Cespedes to the area of 2115 Seminole Drive where he drove through the yard, exited the vehicle with a firearm and began firing at the deputies. K-9 Deputy Ron McMullen deployed his partner “Koda” as he and other deputies attempted to apprehend Cespedes. The suspect fired multiple shots at the deputies, s…	http://www.leoncountyso.com/docs/news-releases/020113k-9-killed-in-shooting.pdf?sfvrsn=4	Ron McMullen & Tyler Epstein	Yes	5	I've already requested to receive updates.				2013-01-31	2	No, I have another incident to log.
GAFulton	2014-08-22 14:22:26	2013-01-31	GA - Georgia	Fulton	Atlanta	Georgia State Police	Terico Powell	35	Male	Black or African American	Not of Hispanic or Latino origin	Black	1	Hit	Unarmed	Unarmed	Powell was shot when stopping and pointing an object believed to be a weapon at police officer. No weapon was found at the scene. Powell was fleeing after stealing cell phone.	http://www.ajc.com/news/news/local/state-trooper-shoots-man-in-stomach/nWCY7/	Not disclosed	Yes	1	I've already requested to receive updates.
GARichmond	2014-08-25 14:55:34	2013-02-01	GA - Georgia	Richmond	Augusta	Richmond County Sheriff's Department	Chaz Williams	21	Male	Black or African American	Unknown	Black	5	Killed	Armed	Knife or cutting instrument	Williams was shot after fleeing from police. His girlfriend said he was trying to commit suicide.	http://www.wrdw.com/home/headlines/Girlfriend-of-suspect-killed-in-officer-involved-shooting-189453061.html	Michael Woodard	Yes	4	I've already requested to receive updates.
TXTarrant	2014-09-12 13:06:12	2013-02-01	TX - Texas	Tarrant	Fort Worth	Fort Worth PD	Sixto Quezada	22	Male	White	Hispanic or Latino origin	Hispanic		Killed	Armed	Vehicle	"""Police said that at about 10:15 p.m. officers were called to a shooting in the 3100 block of N. Pecan Street north of downtown Fort Worth. A shooting victim was taken to a local hospital, there's no word on the victim's condition. Minutes later police tracked down a vehicle matching the description on Pecan Street in the shooting not far from the scene. Officers approached the car on foot and …	http://www.nbcdfw.com/news/local/Man-Killed-in-Officer-Involved-Shooting-in-Fort-Worth-190583001.html		Yes	3	I've already requested to receive updates.				2013-02-09	1	No, I have an incident/more incidents to log.
NVClark	2014-08-25 15:18:54	2013-02-02	NV - Nevada	Clark	Las Vegas	Las Vegas PD	Tomas Horvath	30	Male	White	Not of Hispanic or Latino origin	White	2	Hit	Armed	Handgun	Suspect was shot during pursuit following a bank robbery.	http://www.jrn.com/ktnv/news/189524031.html	James Larosa	Yes	3	I've already requested to receive updates.				2013-02-02	1
TXCoryell	2014-08-27 10:51:56	2013-02-02	TX - Texas	Coryell	Copperas Cove	Copperas Cove PD	Kristopher Gagliardi	24	Male	White	Not of Hispanic or Latino origin	White	2	Killed	Armed	Knife or cutting instrument	Kristofer Gagliardi, 24, the knife-wielding man whom a Copperas Cove police officer shot to death Saturday night after responding to a domestic disturbance call, was recently diagnosed with bipolar disorder and had used the knife he was carrying to cut his own wrists, his mother, Dawn Prewitt, said Tuesday. Prewitt said she was standing about five feet from her son Saturday night outside of a dup…	http://www.kwtx.com/home/headlines/Local-Man-Killed-By-Police-Was-Bipolar-Family-Questions-Officers-Actions-189931631.html	Billy J. Ray III	Yes	2	I've already requested to receive updates.				2013-02-02	2	No, I have another incident to log.
CALosAngeles	2014-09-04 16:51:36	2013-02-03	CA - California	LosAngeles	Los Angeles	Los Angeles PD	Sergio Pena	37	Male	White	Hispanic or Latino origin	Hispanic		Hit	Armed	Handgun	"According to police, officers received reports of a man with a gun at that location. Upon arriving on scene, an officer-involved shooting occurred."	http://losangeles.cbslocal.com/2013/02/03/man-hospitalized-after-officer-involved-shooting-in-south-la/	Jason Schwab, Cliff Chu, Jason Malik, Carlos Lozano and Erik Mejia.	Yes	4	I've already requested to receive updates.				2013-02-02	1	No, I have an incident/more incidents to log.
NYBronx	2014-09-04 16:56:36	2013-02-03	NY - New York	Bronx	New York City	New York PD	Ramarley Graham	18	Male	Black or African American	Not of Hispanic or Latino origin	Black	1	Killed	Unarmed	Unarmed	"Graham was unarmed when he was chased down and shot in the bathroom of his home by an NYPD narcotics unit."	http://www.huffingtonpost.com/2014/09/04/ramarley-graham_n_5765862.html	Richard Haste	Yes	1	I've already requested to receive updates.				2012-02-02	1	No, I have an incident/more incidents to log.
NYRichmond	2014-09-04 16:54:44	2013-02-03	NY - New York	Richmond	Staten Island	New York PD	Michael Walker	28	Male	Black or African American	Not of Hispanic or Latino origin	Black	2	Hit	Armed	Handgun	"""Cops shot an armed burglary suspect in Staten Island after the gunman pointed his weapon at them, law-enforcement sources said yesterday. Two officers found 28-year-old Michael Walker matching the description of a robbery suspect at Castleton and Treadwell avenues in Richmond Terrace when he allegedly turned and pointed his 9mm Smith and Wesson at them at around 11:25 p.m. Saturday, sources sa…	http://nypost.com/2013/02/03/cops-shoot-robbery-suspect-on-staten-island-police-say-he-pointed-weapon-at-officers-first/		Yes	4	I've already requested to receive updates.				2013-02-02	1	No, I have an incident/more incidents to log.
TNUnion	2014-09-04 16:53:08	2013-02-03	TN - Tennessee	Union	Maynardville	Maynardville PD	Mark Smith	53	Male	White	Not of Hispanic or Latino origin	White	2	Hit	Armed	Handgun	"According to Maynardville Police, two officers responded to a domestic call around 1:30 a.m. Sunday on the 100 block of Summerset Way. When they arrived, homeowner Mark Smith ran out and shot at one of the officers, according to police. The officer fired back."	http://www.local8now.com/home/headlines/Officer-involved-shooting-leaves-suspect-in-stable-condition-189566471.html		Yes	5	I've already requested to receive updates.				2013-02-03	1	No, I have an incident/more incidents to log.
NMDonaAna	2014-09-05 15:48:58	2013-02-04	NM - New Mexico	DonaAna	Las Cruces	Las Cruces PD	Benna E. Belfedal		Male	White	Hispanic or Latino origin	Hispanic	3	Hit	Armed	Knife or cutting instrument	"""On Jan. 15, Belfedal allegedly returned to the home and took some of his belongings but, instead of leaving, went to the backyard and fell asleep on the patio. At around 1 p.m. the following day, Belfedal's brother-in-law went to the backyard and once again ordered Belfedal to leave. The couple then called 911 to report that Belfedal was trespassing on their property. Las Cruces Police officer…	http://www.lcsun-news.com/ci_22500072/suspect-jan-16-trespassing-call-charged-assault	Ricardo Porras	Yes	3	I've already requested to receive updates.				2013-01-16	4	No, I have an incident/more incidents to log.
TXHarris	2014-09-05 15:47:36	2013-02-04	TX - Texas	Harris	Houston	Houston PD	Carlist Ray Brinkley, Jr.	33	Male	Black or African American	Not of Hispanic or Latino origin	Black	10	Hit	Armed	Vehicle	Brinkley was allegedly trying to steal a van, and he attempted to hit officers with the van. The officers shot at him and struck him in the leg.	http://abc13.com/archive/8978713/		Yes	4	I've already requested to receive updates.				2013-02-03	2	No, I have an incident/more incidents to log.
WASpokane	2014-08-20 13:18:34	2013-02-05	WA - Washington	Spokane	Spokane	Spokane Police Department	Jacob Dorfman	52	Male	White	Not of Hispanic or Latino origin	White		Killed	Armed	Handgun	Witnesses reported Dorfrman was firing a gun in the air after disturbing online posts outlining plans for random killings. A car chase ended with Valdez shooting Dorfman to death.	http://www.spokesman.com/stories/2013/feb/08/officer-involved-in-shooting-idd/	Adam Valdez
CALosAngeles	2014-09-08 16:32:50	2013-02-06	CA - California	LosAngeles	Torrance	Los Angeles PD	Margie Carranza	47	Female	White	Hispanic or Latino origin	Hispanic	50	Hit	Unarmed	Unarmed	Two women delivering newspapers were shot in a case of mistaken identity by officers protecting the home of a police captain from a threat by Christopher Dorner.	http://www.dailynews.com/general-news/20130207/police-confuse-truck-for-christopher-dorners-shoot-at-3-people-in-torrance-in-case-of-mistaken-identity		Yes	1	I've already requested to receive updates.				2013-02-06	1	No, I have an incident/more incidents to log.
CALosAngeles	2014-09-08 16:33:59	2013-02-06	CA - California	LosAngeles	Torrance	Los Angeles PD	Emma Hernandez	71	Female	White	Hispanic or Latino origin	Hispanic	50	Hit	Unarmed	Unarmed	Two women delivering newspapers were shot in a case of mistaken identity by officers protecting the home of a police captain from a threat by Christopher Dorner.	http://www.dailynews.com/general-news/20130207/police-confuse-truck-for-christopher-dorners-shoot-at-3-people-in-torrance-in-case-of-mistaken-identity		Yes	1	I've already requested to receive updates.				2013-02-06	1	No, I have an incident/more incidents to log.
CAStanislaus	2014-09-08 16:35:31	2013-02-06	CA - California	Stanislaus	Ceres	Ceres PD	Samuel Tome Matos	33	Male	White	Hispanic or Latino origin	Hispanic	2	Hit	Armed	Knife or cutting instrument	"About 7:45 p.m. Monday, officers took a call from a couple who wanted police to come check on their 33-year-old live-in son. The parents told officials they were worried about his strange behavior. At some point once officers were inside the home, Matos got angry and grabbed a machete, then refused to put it down, the release said. "Matos violently charged and swung the machete towards the offic…	http://www.kcra.com/news/local-news/news-modesto/Police-detail-Monday-incident-Man-with-machete-shot-by-officers-in-Ceres/18444938	Steve Carvalho, Lorenzo Beltran	Yes	3	I've already requested to receive updates.				2013-02-04	2	No, I have an incident/more incidents to log.
FLSt.Lucie	2014-09-09 14:46:13	2013-02-07	FL - Florida	St.Lucie	Fort Pierce	Fort Pierce PD	Nkosi McClain	19	Male	Black or African American	Not of Hispanic or Latino origin	Black		Hit	Armed	Handgun	"WPBF 25 News' Cathleen O'Toole reported that a man shot a female student in the arm before exchanging gunfire with officers, but that shooter was taken into custody. He was wounded in the exchange and briefly hospitalized before being taken to the Fort Pierce Police Department."	http://www.wpbf.com/news/south-florida/treasure-coast-news/Student-gunman-injured-in-shooting-at-Indian-River-State-College/18455968		Yes	5	I've already requested to receive updates.				2013-02-07	9	No, I have an incident/more incidents to log.
MOSt.Louis	2014-09-09 14:42:27	2013-02-07	MO - Missouri	St.Louis	St. Louis	St. Louis PD	Jason N. Noroian	32	Male	White	Not of Hispanic or Latino origin	White	1	Killed	Unarmed	Unarmed	"""It all began when the Port Authority spotted a black sedan trolling suspiciously along the riverfront and alerted police. Two officers in a squad car arrived at the scene and found a dark-colored vehicle matching that description. They ran a check on the driver, a white male in his early 30s, and found that he had several outstanding warrants for his arrest. One of the officers tried to get th…	http://fox2now.com/2013/02/07/st-louis-police-investigating-a-shooting-on-riverfront/		Yes	3	I've already requested to receive updates.				2013-02-07	7	No, I have an incident/more incidents to log.
UTSaltLake	2014-09-09 14:41:03	2013-02-07	UT - Utah	SaltLake	Murray	Murray PD	Shawn M. Campbell		Male	White	Not of Hispanic or Latino origin	White	2	Hit	Armed	Toy/fake/non-lethal gun	Campbell was shot after confronting officers with a BB gun. He'd called 911 to report that he didn't want to live and had a weapon.	http://slco.org/districtattorney/pdf/020713_OICI_Letter_P.pdf	Trent Pearson	Yes	4	I've already requested to receive updates.				2013-01-08	3	No, I have an incident/more incidents to log.
UTSaltLake	2014-09-09 14:39:14	2013-02-07	UT - Utah	SaltLake	Salt Lake City	Joint Criminal Apprehension Team	Kelly Fay Simons	38	Female	White	Not of Hispanic or Latino origin	White		Killed	Armed	Vehicle	"On Jan. 9, near Liberty Park, Simons was fatally shot when she allegedly attempted to run down an officer from the Joint Criminal Apprehension Team with her pickup truck."	http://www.sltrib.com/sltrib/news/55607124-78/daughter-simons-kelly-police.html.csp		Yes	5	I've already requested to receive updates.				2013-01-09	3	No, I have an incident/more incidents to log.
ARRandolph	2014-09-11 12:41:21	2013-02-08	AR - Arkansas	Randolph	Pocahontas	Pocahontas PD	Jonathan Tims	27	Male	White	Not of Hispanic or Latino origin	White	7	Killed	Armed	Handgun	"""Arkansas State Police say the Pocahontas officers were investigating a report that Tims had threatened his girlfriend with a gun. Authorities say Tims fled into nearby woods and pulled out a handgun when he was confronted by four officers. Authorities say the officers opened fire, hitting him seven times."""	http://www.arkansasonline.com/news/2013/mar/06/pocahontas-officers-cleared-fatal-shooting/?print		Yes	3	I've already requested to receive updates.				2013-02-07	1	No, I have an incident/more incidents to log.
CATulare	2014-09-11 12:51:31	2013-02-08	CA - California	Tulare	Visalia	Visalia PD	Armando Santibanez	22	Male	White	Hispanic or Latino origin	Hispanic	5	Killed	Armed	Handgun	"""Santibanez had been pulled over in a rented BMW on South Pinkham Street and Beech Avenue, about a block away from a Visalia elementary school, after undercover officers following him witnessed him selling drugs. Once Santibanez was pulled over, he refused to come out of the car, said Visalia Police Chief Colleen Mestas. Santibanez then rolled up his windows and began revving the car's engine b…	http://www.kmph-kfre.com/story/21110616/details-emerge-in-visalia-officer-involved-shooting		Yes	3	I've already requested to receive updates.				2013-02-11	10	No, I have an incident/more incidents to log.
LACaddoParish	2014-09-11 12:48:48	2013-02-08	LA - Louisiana	CaddoParish	Shreveport	Shreveport PD	DeEric Bailey	22	Male	Black or African American	Not of Hispanic or Latino origin	Black	16	Killed	Unarmed	Unarmed	"Bailey was shot to death while fleeing police during a traffic stop. Shreveport Police Department’s Internal Af­fairs cleared the two officers that were involved. The D.A.’s investigation was based mostly on the police car’s dash camera. "	http://www.louisianaweekly.com/shreveport-police-cleared-in-traffic-stop-shooting/	Hai Phan, Jennifer Monereau	Yes	1	I've already requested to receive updates.				2012-08-19	10	No, I have an incident/more incidents to log.
MNHennepin	2014-09-11 12:39:50	2013-02-08	MN - Minnesota	Hennepin	Brooklyn Center	Brooklyn Center PD	Dontalyo Wright	20	Male	Black or African American	Not of Hispanic or Latino origin	Black		Killed	Armed	Rifle	"""Moua was the first to respond to the May 31 report that Wright was carrying a rifle and walking down the middle of the street at 53rd Avenue and Emerson Avenue in Brooklyn Center. The officer confronted Wright around 8:30 p.m. and was forced to shoot him. Wright died at the scene of multiple gun shot wounds, according to the Hennepin County Medical Examiner. Residents of the neighborhood were …	http://post.mnsun.com/2013/02/no-charges-in-brooklyn-center-officer-involved-shooting/	Kou Moua	Yes	3	I've already requested to receive updates.				2012-05-31	1	No, I have an incident/more incidents to log.
NVClark	2014-09-11 12:35:32	2013-02-08	NV - Nevada	Clark	Las Vegas	Metro Police Department	Robert A. Torres	33	Male	White	Hispanic or Latino origin	Hispanic		Killed	Armed	Handgun	"Around 3 p.m., police were alerted to the whereabouts of a man suspected of shooting his girlfriend in the face at close range earlier this week, Metro Capt. Chris Jones said. Officers observed the suspect, estimated to be about 35 years old, exiting an apartment in the 4200 block of Pennwood Avenue, near Arville Street and Clark High School. He then walked toward a vehicle parked on Pennwood wh…	http://www.lasvegassun.com/news/2013/feb/08/police-investigating-officer-involved-shooting/	Joseph Parra, Scott Thomas	Yes	5	I've already requested to receive updates.				2013-02-08	1	No, I have an incident/more incidents to log.
TXCameron	2014-09-11 12:45:53	2013-02-08	TX - Texas	Cameron	Brownsville	Brownsville PD	Jose Limon	35	Male	White	Hispanic or Latino origin	Hispanic		Killed	Armed	Handgun	"""Trujillo was one of four officers to respond to the home where six family members were being held at gunpoint by armed men demanding money, jewelry and access to what turned out to be an empty safe. Trujillo and another officer snuck in through a sliding glass door at the rear of the house and surprised the masked assailants, later identified by police as Jose Limon and Cecilio Mendoza. Inside…	http://www.brownsvilleherald.com/news/local/article_2077ec8d-664c-5cae-9dbc-329c8f6b1c17.html?mode=jqm	Rolando Trujillo	Yes	4	I've already requested to receive updates.				2013-02-04	2	No, I have an incident/more incidents to log.
TXCameron	2014-09-11 12:47:09	2013-02-08	TX - Texas	Cameron	Brownsville	Brownsville PD	Cecilio Mendoza	22	Male	White	Hispanic or Latino origin	Hispanic		Hit	Armed	Handgun	"""Trujillo was one of four officers to respond to the home where six family members were being held at gunpoint by armed men demanding money, jewelry and access to what turned out to be an empty safe. Trujillo and another officer snuck in through a sliding glass door at the rear of the house and surprised the masked assailants, later identified by police as Jose Limon and Cecilio Mendoza. Inside…	http://www.brownsvilleherald.com/news/local/article_2077ec8d-664c-5cae-9dbc-329c8f6b1c17.html?mode=jqm	Rolando Trujillo	Yes	4	I've already requested to receive updates.				2013-02-04	2	No, I have an incident/more incidents to log.
MIBarry	2014-09-11 17:09:58	2013-02-09	MI - Michigan	Barry	Baltimore Township	Barry County Sheriff's Department	Ralph Oliver Elliott	41	Male	White	Not of Hispanic or Latino origin	White	5	Killed	Armed	Firearm; not stated	"MSP Detective Chuck Christensen told FOX 17 NEWS that at 6:19 p.m. Saturday deputies were called to a domestic situation involving a man and a gun at 9840 Banfield Road in Dowling. By 7 p.m. five deputies were on the scene. There was a short standoff in the driveway of the home and the five deputies fired five shots, the man was hit and later died at Pennock Hospital in Hastings."	http://fox17online.com/2013/02/10/deadly-officer-involved-shooting-in-barry-county/		Yes	3	I've already requested to receive updates.				2013-02-09	1	No, I have an incident/more incidents to log.
MOSt.Louis	2014-09-11 17:08:37	2013-02-09	MO - Missouri	St.Louis	St. Louis	St. Louis PD	Otis Roberson	32	Male	Black or African American	Not of Hispanic or Latino origin	Black		Killed	Armed	Handgun	"""Two secondary officers on a golf cart reportedly heard at least one gunshot, then located Roberson holding a gun near the entrance to an alley. Authorities say Roberson was ordered to drop his gun, but instead turned and pointed the weapon at the officers. Both officers then fired several shots, according to police, and Roberson was struck by gunfire."""	http://www.kmov.com/news/editors-pick/Police-respond-to-officer-involved-shooting-near-Soulard-Mardi-Gras-190540041.html		Yes	3	I've already requested to receive updates.				2013-02-09	1	No, I have an incident/more incidents to log.
TXDallas	2014-09-11 17:07:17	2013-02-09	TX - Texas	Dallas	Dallas	Dallas PD	Stoney Eugene Rawlinson	39	Male	White	Not of Hispanic or Latino origin	White		Killed	Armed	Shotgun	"""Dallas police said they received word that 39-year old Stoney Eugene Rawlinson, a person of interest in a homicide, wanted to turn himself in to police. According to Dallas police, arrangements were made for the man to meet with uniformed officers in a parking lot in the 6500 block of Skillman Avenue near Abrams Road.When officers arrived they said the man was sitting inside his car armed with…	http://www.nbcdfw.com/news/local/Man-Dead-in-Officer-Involved-Shooting-190514171.html		Yes	3	I've already requested to receive updates.				2013-02-09	1	No, I have an incident/more incidents to log.
CASolano	2014-09-12 13:08:57	2013-02-10	CA - California	Solano	Vallejo	Vallejo PD	Anton Barrett Sr.	41	Male	Black or African American	Not of Hispanic or Latino origin	Black		Killed	Unarmed	Unarmed	"""The incident began shortly after midnight when two officers assigned to look for drunken drivers saw a motorist in a white Lexus driving without his lights on near Santa Clara and Indiana streets, said Vallejo police Lt. Ken Weaver. The car was traveling very fast and wasn't stopping at intersections, and the officers tried to stop it, Weaver said. The driver, later identified as Barrett, fail…	http://www.sfgate.com/crime/article/Fatal-shooting-by-Vallejo-police-is-2nd-in-3-days-3590418.php		Yes	1	I've already requested to receive updates.				2012-05-28	2	No, I have an incident/more incidents to log.
CASolano	2014-09-12 13:10:22	2013-02-10	CA - California	Solano	Vallejo	Vallejo PD	Peter Mestler	53	Male	White	Not of Hispanic or Latino origin	White		Killed	Armed	Toy/fake/non-lethal gun	"""Peter Mestler, 53, of Vallejo had pulled the gun on a cabbie and his passenger, as well as a woman walking on the street, shortly before officers confronted him near the corner of Sonoma Boulevard and Carolina Street early Friday, police said. The officers told Mestler to stop, but he reached into his jacket, pulled out the gun and refused to drop it after they told him to, police said. The of…	http://www.sfgate.com/crime/article/Vallejo-man-shot-by-police-was-upset-about-divorce-3593315.php		Yes	3	I've already requested to receive updates.				2012-05-24	2	No, I have an incident/more incidents to log.
KYJefferson	2014-09-12 13:11:41	2013-02-10	KY - Kentucky	Jefferson	Louisville	Louisville Metro PD	Ishmael Gough	22	Male	Black or African American	Not of Hispanic or Latino origin	Black		Hit	Unarmed	Unarmed	"""In an interview with WDRB's Valerie Chinn a few days after the shooting, Gough's attorney, Derek O'Bryan, said Gough was on his way home from his aunt's house after a night of watching movies, but got into a confrontation with Carthan at 24th and Chestnut Streets Tuesday night, about a block from his home, authorities say. ""He was being tailed by Detective Carthan,"" O'Bryan said. ""He (Gough…	http://www.lmpd.com/news/story.php?sid=1075	Chauncey Carthan	Yes	1	I've already requested to receive updates.				2012-09-04	4	No, I have an incident/more incidents to log.
OHMontgomery	2014-09-12 13:07:34	2013-02-10	OH - Ohio	Montgomery	Dayton	Dayton PD	Daniel Holt	34	Male	White	Not of Hispanic or Latino origin	White	5	Killed	Armed	Rifle	"The man who was killed Sunday by two Dayton police sergeants was pointing a rifle at one sergeant and ignored repeated orders to put the weapon down, according to in-car camera video and audio released Monday by police."	http://www.daytondailynews.com/news/news/man-shot-killed-by-police-in-triangle-park/nWLQX/	Mark Ponichtera and Andrew Gillig	Yes	4	I've already requested to receive updates.				2013-02-10	1	No, I have an incident/more incidents to log.
CAContraCosta	2014-09-12 16:47:57	2013-02-11	CA - California	ContraCosta	Richmond	Richmond PD	Elston Young	30	Male	Black or African American	Not of Hispanic or Latino origin	Black		Hit	Armed	Handgun	"A man was hospitalized and is currently in stable condition after being shot by Richmond police officers on Monday night. Police responded to a ShotSpotter activation and 911 calls reporting a man with a gun at B Street and Nevin Avenue near the St. John’s Apartments just after 5 pm, said Richmond Police Lt. Bisa French."	http://richmondconfidential.org/2013/02/11/armed-man-shot-in-officer-involved-shooting/		Yes	2	I've already requested to receive updates.				2013-02-11	1	No, I have an incident/more incidents to log.
CANapa	2014-09-12 16:53:28	2013-02-11	CA - California	Napa	Napa	Napa PD	Luis Contreras/Luis Alejandre	26	Male	White	Hispanic or Latino origin	Hispanic	1	Hit	Unarmed	Unarmed	"""Keener shot Luis Contreras, also known as Luis Alejandre, in the face on May 13 in a backyard in the 2100 block of Parrish Road following a foot chase across four backyards and over fences, according to the district attorney’s report issued Friday. Moments before the shot was fired, an exhausted Keener had fallen on his back and Contreras was grabbing for the officer’s flashlight and his gun, …	http://napavalleyregister.com/business/d-a-clears-officer-in-east-napa-shooting/article_e123aa8e-74cd-11e2-bada-001a4bcf887a.html	Thomas Keener	Yes	1	I've already requested to receive updates.				2012-05-13	4	No, I have an incident/more incidents to log.
MTYellowstone	2014-09-12 16:49:21	2013-02-11	MT - Montana	Yellowstone	Billings	Billings PD	Jason Shaw	32	Male	White	Not of Hispanic or Latino origin	White	1	Killed	Armed	Toy/fake/non-lethal gun	"A 32-year-old man is dead after a Billings police officer shot him in the stomach during a confrontation early Monday as the man went for a weapon that turned out to be a BB gun, authorities said. Police Lt. Kevin Iffland said Shaw was a passenger in a vehicle that was stopped in a residential neighborhood near downtown, where authorities had been looking for another individual. When Officer Gra…	http://www.oregonlive.com/pacific-northwest-news/index.ssf/2013/02/man_with_bb_gun_fatally_shot_b.html	Grant Morrison	Yes	2	I've already requested to receive updates.				2013-02-11	1	No, I have an incident/more incidents to log.
NYNewYork	2014-09-12 16:52:08	2013-02-11	NY - New York	NewYork	New York City	New York PD	Gino Mercado	16	Male	White	Hispanic or Latino origin	Hispanic	3	Hit	Armed	Handgun	"""Cops shot and wounded an armed teen during an apparent cross-rooftop shooting in Brooklyn late Monday night, police sources said. Officers assigned to the 73rd Precinct in Brownsville responded to reports of gunfire on Atlantic Avenue near Monaco Place about 9:35 p.m., the sources said. As a sergeant and an officer canvassed a rooftop in the area, they encountered a gunman on top of an adjacen…	http://www.nydailynews.com/new-york/brooklyn/cops-shoot-suspect-rooftop-gun-battle-article-1.1261530		Yes	2	I've already requested to receive updates.				2013-02-11	4	No, I have an incident/more incidents to log.
PAAllegheny	2014-09-12 16:50:45	2013-02-11	PA - Pennsylvania	Allegheny	Pittsburgh	Pittsburgh	Leon Ford	19	Male	Black or African American	Not of Hispanic or Latino origin	Black	4	Hit	Unarmed	Unarmed	"""Police said that during the traffic stop, another officer who arrived as backup, David Derbish, leaned into the car on the passenger's side, believing Mr. Ford was reaching for a gun. Mr. Ford hit the gas pedal and the two men struggled in the car until Officer Derbish shot him four times in the torso, leaving him in critical condition. He crashed seconds later. Mr. Ford faces charges of aggra…	http://www.post-gazette.com/neighborhoods-city/2013/02/11/Pittsburgh-police-re-examine-audio-record-policy/stories/201302110237	David Derbish	Yes	1	I've already requested to receive updates.				2012-11-11	1	No, I have an incident/more incidents to log.
CAOrange	2014-09-15 15:17:23	2013-02-12	CA - California	Orange	Santa Ana	Santa Ana PD	John Berry Horton	43	Male	White	Not of Hispanic or Latino origin	White	2	Hit	Armed	Handgun	"""The shooting occurred just before 2 a.m. in the area of Morningside Avenue after officers received reports of an armed man walking around the neighborhood, Bertagna said. Officers were scanning the neighborhood on foot when Horton, a documented gang member, came out of a garage with a handgun, Bertagna said. Horton lives in that residence, Bertagna added. Bertagna said the shooting occurred wh…	http://www.ocregister.com/articles/officers-382489-santa-bertagna.html		Yes	4	I've already requested to receive updates.				2013-01-04	1	No, I have an incident/more incidents to log.
GACobb	2014-09-15 14:50:33	2013-02-12	GA - Georgia	Cobb	Smyrna	Smyrna PD	Kevin Shymell Gibbs	24	Male	Black or African American	Not of Hispanic or Latino origin	Black		Hit	Armed	Vehicle	"""The incident began around 5 p.m. as a traffic stop near the intersection of Spring and Park roads, according to Officer Michael Smith with Smyrna police. Gibbs allegedly tried to run down the officer, who was forced to fire, Smith said. Gibbs then got back into this vehicle and led the officer on a pursuit for about a mile, striking several vehicles, Smith said. The chase ended when Gibbs’ car…	http://www.ajc.com/news/news/1-injured-in-officer-involved-shooting-in-smyrna/nWMzk/		Yes	3	I've already requested to receive updates.				2013-02-12	1	No, I have an incident/more incidents to log.
MIWayne	2014-09-15 15:21:36	2013-02-12	MI - Michigan	Wayne	Northville Township	Michigan State Police	Gabriel Vernon Stevenson	18	Male	Black or African American	Not of Hispanic or Latino origin	Black		Killed	Armed	Knife or cutting instrument	"""Police shot Stevenson after he crashed the pickup truck he was driving into a home at Six Mile and Dixboro roads in rural Northfield Township in Livingston County. “The suspect exited the vehicle and attempted to enter the home (by) breaking a window,” Werth said in the release. “The suspect was confronted by Northville Township, Michigan State Police and other agencies. The suspect advanced t…	http://www.annarbor.com/news/crime/police-release-name-of-teenager-killed-by-police-after-lunging-at-officers-with-a-knife/		Yes	3	I've already requested to receive updates.				2013-02-12	6	No, I have an incident/more incidents to log.
NCGuilford	2014-09-15 15:19:43	2013-02-12	NC - North Carolina	Guilford	Greensboro	Greensboro PD	Tommy Campbell Jr.	34	Male	Black or African American	Not of Hispanic or Latino origin	Black		Hit	Unarmed	Unarmed	Campbell has mental-health issues and police were called to his home by his wife, who feared for their child. "That’s when police believe Mr. Campbell attacked Officer Simpson, pushing and hitting her, following her outside as he continued to assault her." “Mr Campbell’s assault was both violent and relentless,” said Chief Dwight Crotts in a news conference Wednesday morning. “At some point in ti…	http://myfox8.com/2013/02/12/officer-involved-shooting-reported-in-greensboro/	T.L. Simpson	Yes	2	I've already requested to receive updates.				2013-02-12	3	No, I have an incident/more incidents to log.
CAContraCosta	2014-09-16 16:29:28	2013-02-13	CA - California	ContraCosta	Pittsburg	Pittsburg PD	Troy Aben Makanski	30	Male	White	Not of Hispanic or Latino origin	White		Hit	Armed	Handgun	"""The incident began around 11:30 Tuesday night when two officers saw a 30-year-old Oakley man, who had a long arrest record, at 12th and Maple streets. A routine stop turned into a foot chase before the suspect turned and fired on police. One officer was hit and the suspect was injured as well."""	http://sanfrancisco.cbslocal.com/2013/02/13/pittsburg-police-officer-injured-in-late-night-shooting/		Yes	4	I've already requested to receive updates.				2013-02-12	1	No, I have an incident/more incidents to log.
FLHernando	2014-09-16 16:30:55	2013-02-13	FL - Florida	Hernando	Brooksville	Tampa PD and Hernando County Sheriff's Office	Inga Marie Swanson	42	Female	White	Not of Hispanic or Latino origin	White		Killed	Armed	Handgun	"""She opened the door and tried to get in, saying ""I love you"" repeatedly to the child, according to the memo. Glass removed her from the truck, only then noticing she was wearing no clothing. As she walked away, she told him, ""My daddy's going to kill you,"" the report said. Howard and Mechler, who didn't see the incident, were told about it and went into the street to see what was going on.…	http://www.tampabay.com/news/publicsafety/crime/medals-of-valor-given-to-two-officers-involved-in-shooting-of-naked/1275134	William Mechler and Rocky Howard	Yes	4	I've already requested to receive updates.				2012-10-20	1	No, I have an incident/more incidents to log.
KYKenton	2014-09-16 16:33:33	2013-02-13	KY - Kentucky	Kenton	Villa Hills	Kenton County SWAT Team	Ronald Corman	46	Male	White	Not of Hispanic or Latino origin	White	4	Hit	Armed	Shotgun	"""Officers were called to a home on Amsterdam Road about 1 a.m. Wednesday. Officers said when they arrived, they found a woman lying in the front yard with gunshot wounds. Moments later, a man appeared at the door of the home with a shotgun, according to police. ""When other officers arrived on the scene, he appeared in a doorway, (and) he had a weapon in his hand. He refused to comply with dema…	http://www.wlwt.com/news/local-news/news-northern-kentucky/Police-identify-gunman-in-Villa-Hills-shooting/18526496		Yes	5	I've already requested to receive updates.				2013-02-13	4	No, I have an incident/more incidents to log.
TXHarris	2014-09-16 16:27:42	2013-02-13	TX - Texas	Harris	Houston	Houston PD	Jan Michael Vincent	33	Male	Black or African American	Not of Hispanic or Latino origin	Black	1	Hit	Unarmed	Unarmed	"HPD Homicide Division Officers also offered the following details of the incident: “HPD patrol officers were conducting an investigation at the above address, which is a known area for narcotics activity. Officers saw suspect Vincent, approached and gave him verbal commands to identify himself. Vincent ignored the officers’ commands, quickly got into his vehicle and began to rummage in the cente…	http://houston.cbslocal.com/2013/02/13/hpd-investigates-officer-involved-shooting/	D. Morelli	Yes	2	I've already requested to receive updates.				2013-02-13	1	No, I have an incident/more incidents to log.
TXHarris	2014-09-16 16:32:16	2013-02-13	TX - Texas	Harris	Houston	Houston PD	Kenny Detrellas Montgomery	34	Male	Black or African American	Not of Hispanic or Latino origin	Black		Killed	Armed	Knife or cutting instrument	"""The suspect who police say was six-feet and four inches tall and 250 pounds picked up the child and threatened to cut him with an extra large butcher knife. Police called the SWAT and its hostage negotiating teams to the scene. Before they arrived, the father allegedly took his son towards a bathroom and put the knife to the boy s throat. They can see him at that point put a knife to the baby …	http://www.khou.com/story/news/2014/07/22/11963798/	J. Fisher	Yes	5	I've already requested to receive updates.				2013-02-13	4	No, I have an incident/more incidents to log.
CARiverside	2014-09-17 15:27:56	2013-02-14	CA - California	Riverside	Indio	Indio PD	Alejandro Rendon	23	Male	White	Hispanic or Latino origin	Hispanic	2	Killed	Unarmed	Unarmed	"Indio Police says the shooting happened at 82400 Miles Avenue around 11:30 p.m. Thursday. Indio Police Public Information Officer Ben Guitron says an officer saw Rendon on a bicycle and tried to stop him. Rendon reportedly sped off from the officer. The officer located Rendon a short time later and the officer involved shooting occurred. Police say they are still investigating what exactly led u…	http://www.kesq.com/kesq/Police-shoot-and-kill-Indio-man-details-of-shooting-still-a-mystery/18561016	Alex Franco	Yes	1	I've already requested to receive updates.				2013-02-14	4	No, I have an incident/more incidents to log.
CALosAngeles	2014-09-18 16:17:53	2013-02-15	CA - California	LosAngeles	Monterey Park	Monterey Park Police Department	Emmanuel Franco	25	Male	White	Unknown	White		Killed	Armed	Handgun	"""Montebello police responded to a report of a domestic disturbance between a man and his girlfriend at a motel just after 12 a.m. Arriving officers saw a couple take off in a vehicle, which they followed to Atlantic Boulevard and Harding Avenue. Monterey Park police then initiated a traffic stop and the man flashed a handgun at officers, which prompted them to start shooting. The suspect died a…	http://www.insidesocal.com/sgvcrime/2013/02/15/police-fatally-shoot-armed-man-in-monterey-park/		Yes	4	I've already requested to receive updates.				2013-02-15	1	No, I have an incident/more incidents to log.
IABlackHawk	2014-09-18 16:19:13	2013-02-15	IA - Iowa	BlackHawk	Waterloo	Waterloo PD	Derrick Ambrose Jr.	22	Male	Black or African American	Not of Hispanic or Latino origin	Black		Killed	Armed	Handgun	"According to an early DCI account, Ambrose was spotted pointing a gun at a crowd when Law arrived. Ambrose ignored Law’s command to drop the weapon and ran down Riehl Street, DCI officials said. During the chase, Ambrose stepped out from behind a tree, and Law shot, striking him in the head, the DCI account states."	http://wcfcourier.com/news/local/officer-involved-shooting-case-will-go-to-grand-jury-county/article_af4f0cbc-7773-11e2-bfe5-0019bb2963f4.html	Kyle Law	Yes	3	I've already requested to receive updates.				2012-11-18	2	No, I have an incident/more incidents to log.
CAOrange	2014-09-19 15:49:50	2013-02-16	CA - California	Orange	Anaheim	Anaheim PD	Martin Angel Hernandez	21	Male	White	Hispanic or Latino origin	Hispanic		Killed	Armed	Shotgun	"""Officers about 9:45 p.m. responded to reports of five or six males in an alley in the 100 block of East Wakefield Avenue, at least one of whom was seen with a firearm, Anaheim police Sgt. Robert Dunn said. Community members shouted at Anaheim Police Chief John Welter for what some said was a murder. But Welter said that a preliminary investigation determined that an officer fired his weapon th…	http://www.ocregister.com/articles/police-345580-hernandez-welter.html		Yes	3	I've already requested to receive updates.				2012-03-06	1	No, I have an incident/more incidents to log.
ILCook	2014-09-19 15:53:46	2013-02-16	IL - Illinois	Cook	Chicago	Chicago PD		23	Male	Black or African American	Not of Hispanic or Latino origin	Black	3	Hit	Armed	Vehicle	"""Tactical unit officers from the Harrison District spotted four men near the corner of South Springfield Avenue and West Chicago Avenue. They were “known narcotics operators,” said Pat Camden, spokesman for the Fraternal Order of Police union. Chicago Police said their officers saw the men conducting a drug transaction. When officers identified themselves, a suspect ran into a nearby lot, said …	http://www.dnainfo.com/chicago/20130216/humboldt-park/police-shoot-man-after-cop-pinned-between-two-cars		Yes	2	I've already requested to receive updates.				2013-02-16	1	No, I have an incident/more incidents to log.
TXRockwall	2014-09-19 15:52:33	2013-02-16	TX - Texas	Rockwall	Rockwall	Rockwall PD	Anthony Dewayne Lewis	47	Male	White	Not of Hispanic or Latino origin	White		Hit	Armed	Handgun	"""According to a Rockwall police department news release, officers responded to a shooting call in the 2000 block of Summer Lee around 7:53 p.m. Saturday. Police found a male and female victim with multiple gunshot wounds. Both were taken to the hospital, where the female victim died. Rockwall police identified the suspect as the woman's ex-boyfriend, 47-year-old Anthony Dewayne Lewis. Officers …	http://www.nbcdfw.com/news/local/High-Speed-Chase-After-Shooting-at-Movie-Theater--191564671.html		Yes	4	I've already requested to receive updates.				2013-02-16	1	No, I have an incident/more incidents to log.
ORMultnomah	2014-08-21 14:48:25	2013-02-17	OR - Oregon	Multnomah	Portland	Portland Police	Merle Mikal Hatch	50	Male	White	Unknown	White	6	Killed	Armed	Toy/fake/non-lethal gun	Police responded to reports of a man threatening hospital staff and security guards with a gun. Hatch was acting erratically and waving a black gun shaped object in a dark parking lot. After many attempts to calm Hatch, he charged the police and 3 officers shot and killed Hatch. The item in his hand was a broken phone handset.	http://www.portlandmercury.com/portland/the-death-of-merle-hatch/Content?oid=8888987	Nathan Voeller, Andrew Hearst, and Royce Curtiss	Yes	4
SCRichland	2014-08-26 18:53:55	2013-02-18	SC - South Carolina	Richland	Columbia	Richland County Sheriff's Office	Adam Jurgen	24	Male	White	Unknown	White		Killed	Armed	Handgun	From Wikipedia summary: "Police were responding to report of a man assaulting a woman. The man, Jurgen, fled the scene and then fired at officers, striking deputy Sheila Aull. Aull and at least four other officers returned fire and killed Jurgen."	http://en.wikipedia.org/wiki/List_of_killings_by_law_enforcement_officers_in_the_United_States,_February_2013#cite_note-2		Yes	4	No thanks.				2013-02-26	1	No, I have another incident to log.
VAFairfax	2014-08-23 18:41:17	2013-02-18	VA - Virginia	Fairfax	Alexandria City	Alexandria Police Department	Taft Sellers	30	Male	Black or African American	Not of Hispanic or Latino origin	Black	37	Killed	Armed	Handgun	Officers responded to a domestic disturbance call. Suspect said to have a gun. Responding officers encountered suspect at the stairwell of the apartment. Witnesses and video confirm a conversation between suspect and officers (duration not stated). Officer Dunn retreated to his vehicle for a shotgun, and loaded a shell to the chamber. Suspect drew a handgun and aimed it at the officer. Officer Du…	https://www.alexandriava.gov/uploadedFiles/commattorney/info/sellers.pdf	Dunn & Panesar	Yes	4	No thanks.
AKAnchorageMunicipality	2014-08-26 21:26:35	2013-02-19	AK - Alaska	AnchorageMunicipality	Anchorage	Anchorage Police	Carl Richard Bowie III	25	Male	White	Not of Hispanic or Latino origin	White	7	Killed	Armed	Vehicle	Police responded to a suspicious-person report, and suspect fled the scene in a vehicle reported stolen earlier in the day. Officers gave chase. Attempts to stop the vehicle failed, and suspect rammed a police vehicle and other vehicles in an attempt to escape. Officers fired on suspect, killing him. Wikipedia link is dead. This URL works: http://www.adn.com/article/anchorage-police-release-names…	http://en.wikipedia.org/wiki/List_of_killings_by_law_enforcement_officers_in_the_United_States,_February_2013#cite_ref-12	Billiet & Rydberg	Yes	4	No thanks.				2013-02-19	1	No, I have another incident to log.
ALDale	2014-08-26 23:35:39	2013-02-19	AL - Alabama	Dale		FBI Hostage Rescue Team	Jimmy Lee Dykes	65	Male	White	Not of Hispanic or Latino origin	White		Killed	Armed	Explosives	High-profile case of child abduction, ending in a six-day standoff outside an underground bunker on the suspect's property. Suspect had numerous weapons to hand. Standoff ended when suspect was observed wielding a gun inside the bunker, and FBI team blew the top of the bunker with explosives, dropped in stun grenades, and shot the suspect.	http://en.wikipedia.org/wiki/List_of_killings_by_law_enforcement_officers_in_the_United_States,_February_2013#cite_ref-19		Yes	5	No thanks.				2013-02-04	1	No, I have another incident to log.
CARiverside	2014-08-26 19:51:31	2013-02-19	CA - California	Riverside	Riverside	Riverside Police Department	Lorenzo Joseph Ciaramella	39	Male	Unknown	Hispanic or Latino origin	Hispanic	5	Killed	Armed	Vehicle	Officers responded to a sighting of a stolen vehicle. When officers arrived, suspect fled in the vehicle, officers pursued, and suspect collided with another vehicle, then rammed one of the officers. Suspect was shot by officers, and was pronounced dead from his injuries at hospital.	http://usgunviolence.wordpress.com/2013/02/25/dead-man-riverside-ca/		Yes	4	No thanks.				2013-02-25	1	No, I have another incident to log.
FLDuval	2014-08-26 21:56:17	2013-02-19	FL - Florida	Duval	Jacksonville	Jacksonville Police Department	John Dawson Parker	23	Male	Black or African American	Not of Hispanic or Latino origin	Black		Killed	Armed	Handgun	After a traffic stop for a broken tail light, suspect ran and was tackled by officers. Suspect pulled a gun from waistband and fired without effect. Officers responded with gunfire, striking suspect multiple times in the chest. Suspect as both the son of a police officer, and a known member of a local gang. Better URL: http://members.jacksonville.com/news/crime/2013-02-19/story/routine-traffic-st…	http://en.wikipedia.org/wiki/List_of_killings_by_law_enforcement_officers_in_the_United_States,_February_2013#cite_ref-15	Soucek & Hathaway	Yes	3	No thanks.				2013-02-19	1	No, I have another incident to log.
MILivingston	2014-08-27 02:19:34	2013-02-19	MI - Michigan	Livingston	Green Oak Township	Michigan State Police & Green Oak Township Police	Kevin Hassell	31	Male	White	Not of Hispanic or Latino origin	White		Killed	Armed	Unknown	Officers responded to a break-in report. On arrival suspect fled from site of break-in into own home. Officers pursued suspect inside, and an exchange of gunfire ensued in which suspect was fatally wounded.	http://www.annarbor.com/news/crime/break-in-suspect-shot-dead-by-state-police-identified-by-neighbors/		Yes	3	No thanks.				2013-02-19	4	No, I have another incident to log.
TXCameron	2014-08-26 23:26:07	2013-02-19	TX - Texas	Cameron	Harlingen	Harlingen Police Department	Price Robinson Perrin	87	Male	White	Unknown	White	8	Killed	Armed	Handgun	Police responded to a report of domestic violence. After police arrived, suspect shot a woman (his wife) in the torso. Police fired on the suspect, killing him. Better URLs: http://www.valleycentral.com/news/story.aspx?id=855841#.U_1OeN9QPXI http://www.themonitor.com/news/local/article_5e8e5e98-6f32-11e2-9951-0019bb30f31a.html	http://en.wikipedia.org/wiki/List_of_killings_by_law_enforcement_officers_in_the_United_States,_February_2013#cite_ref-18		Yes	5	No thanks.				2013-02-03	1	No, I have another incident to log.
WASpokane	2014-08-26 20:01:21	2013-02-19	WA - Washington	Spokane	Spokane	Spokane Police	Christoper Parker	33	Male	White	Not of Hispanic or Latino origin	White	1	Killed	Unarmed	Unarmed	Suspect himself called 911, reporting that he was diabetic and had ingested methamphetamine. Police arrived, took suspect into custody, and booked him under an outstanding arrest warrant. Police report that suspect was shot with a Taser when he became uncooperative. NOT TECHNICALLY A SHOOTING.	http://en.wikipedia.org/wiki/List_of_killings_by_law_enforcement_officers_in_the_United_States,_February_2013#cite_ref-7		Yes	1	No thanks.				2013-02-24	1	No, I have another incident to log.
INAllen	2014-08-21 00:03:12	2013-02-20	IN - Indiana	Allen	Fort Wayne	Fort Wayne Police Department	Stephen O’Neal Wattley II	21	Male	Black or African American	Unknown	Black		Killed	Armed	Firearm; not stated	At 2:27 a.m. Wednesday, officers were called to an armed robbery at CVS Pharmacy, 2802 E. State Blvd., at Beacon Street. Officers chased Wattley toward Baldwin Creek Apartments in the 1900 block of Hobson Road. As two officers approached Building F, they found Wattley standing in the stairwell area on the second floor, York said. Wattley seemed unfamiliar with the apartment complex, York said, an…	http://usgunviolence.wordpress.com/2013/02/20/killed-stephen-oneal-wattley-ii-fort-wayne-in/		Yes
CALosAngeles	2014-08-21 13:50:29	2013-02-21	CA - California	LosAngeles	Long Beach	Long Beach Police	Christopher Allen Taylor	19	Male	Black or African American	Unknown	Black		Killed	Armed	Unknown	Long Beach police shot and killed Taylor, who was suspected of stealing a vehicle after he allegedly opened fire on officers early Thursday, officials said.	http://homicide.latimes.com/post/christopher-allen-taylor/		Yes	3
MOGreene	2014-09-22 15:52:19	2013-02-22	MO - Missouri	Greene	Springfield	Springfield PD	Martin Y. Potts	29	Male	White	Not of Hispanic or Latino origin	White		Killed	Armed	Handgun	"Before the shooting, police tried to pull over a pickup without license plates that was in the area of the burglaries on Thursday night. The driver fled, Williams said, and police did not pursue it. Police later found the truck crashed in the 700 block of North West Avenue. Police followed footsteps in the snow to the house on Grand. A witness also told officers that the driver went to the house…	http://articles.kspr.com/2013-02-22/springfield-police_37248428	Travis Wilson	Yes	5	I've already requested to receive updates.				2013-02-22	1	No, I have an incident/more incidents to log.
OKCraig	2014-09-22 15:56:42	2013-02-22	OK - Oklahoma	Craig	Vinita	Vinita PD	Kenneth Lee Ilderton	26	Male	White	Not of Hispanic or Latino origin	White		Hit	Armed	Vehicle	"""The Oklahoma State Bureau of Investigation says a Kansas man was treated and released from a hospital after he was shot by police in northeastern Oklahoma. Authorities say two Vinita police officers and an officer from the Big Cabin Police Department were involved a pursuit with a vehicle early Wednesday near the junction of U.S. 69 and Oklahoma 66. The suspect, Kenneth Lee Ilderton, 26, alleg…	http://www.ktul.com/story/21289802/osbi-investigating-police-shooting-near-vinita		Yes	3	No thanks.				2013-02-20	2	No, I have an incident/more incidents to log.
PALehigh	2014-09-22 15:55:13	2013-02-22	PA - Pennsylvania	Lehigh	Allentown	Allentown PD	Saturnino Perez De La Rosa	44	Male	White	Hispanic or Latino origin	Hispanic	13	Killed	Armed	Knife or cutting instrument	"""Police officers responded to the scene Thursday after receiving multiple reports of a suspicious man carrying a machete, walking along 12th Street from Linden Street. De la Rosa was allegedly combative when officers arrived, mumbling and making ""wild motions"" with the machete, which officers believed he was about to throw. Officers fired their stun guns but they appeared to have no affect, a…	http://www.lehighvalleylive.com/allentown/index.ssf/2013/02/identity_release_of_allentown.html		Yes	2	No thanks.				2013-02-21	2	No, I have an incident/more incidents to log.
UTWeber	2014-09-22 15:53:48	2013-02-22	UT - Utah	Weber	Ogden	Ogden PD	Clifford Dean Owens	51	Male	White	Not of Hispanic or Latino origin	White		Hit	Unarmed	Unarmed	"""The incident occurred on Dec. 18 after Ogden police had responded to domestic violence report near The Gate at Canyon Ridge apartments at 1455 Valley Drive. Police said that when Kaufman approached Owens sitting in a vehicle, Owens drove away, sideswiping Kaufman's patrol vehicle, a police affidavit states. Kaufman followed him to a dead-end parking area and boxed Owens in with his police car …	http://www.ksl.com/?sid=24173923	Justin Kaufman	Yes	2	I've already requested to receive updates.				2012-12-18	1	No, I have an incident/more incidents to log.
CASanJoaquin	2014-08-23 22:15:16	2013-02-23	CA - California	SanJoaquin	Stockton	San Joaquin County Gang Task Force	Gary Allen Hawkins	33	Male	White	Not of Hispanic or Latino origin	White		Killed	Armed	Handgun	Officers were responding to a robbery. Hawkins accelerated his vehicle in reverse to try and hit the officers, and they responded by opening fire.	http://www.kcra.com/news/local-news/news-stockton/Sheriff-Officers-shoot-kill-robbery-suspect-with-loaded-gun/19060922		Yes	4	I've already requested to receive updates.
CARiverside	2014-09-24 16:43:00	2013-02-25	CA - California	Riverside	Riverside	Riverside PD	Lorenzo Ciaramella	39	Male	White	Not of Hispanic or Latino origin	White		Killed	Armed	Vehicle	"When the suspect saw the officers, he fled in the stolen vehicle through the parking lot of the apartment complex. Officers pursued the suspect through the complex and the suspect vehicle fled out the west gate but collided with another vehicle. As one of the patrol units exited the west gate, the suspect rammed the driver side of the police vehicle and an officer involved shooting occurred. The…	http://www.riversideca.gov/rpd/press/2013releases/022613ois.pdf		Yes	2	I've already requested to receive updates.				2013-02-25	3	No, I have an incident/more incidents to log.
CODouglas	2014-09-24 16:40:18	2013-02-25	CO - Colorado	Douglas	Castle Rock	Castle Rock PD	Gwendolyn Devilbliss	29	Female	White	Not of Hispanic or Latino origin	White		Hit	Armed	Handgun	"""Police attempted to stop the vehicle at the intersection of Crowfoot Valley Road and Stroh Road in Parker, but the suspects fired shots at officers for a second time, Cashman said. The suspect's vehicle continued into the area of North Jordan Road and Jordan Court before they jumped from the vehicle and ran into the Clarke Farms subdivision, Cashman said. Police said the female suspect, Gwendo…	http://www.thedenverchannel.com/news/local-news/suspects-shoot-at-officers-in-castle-rock-and-parker-ram-cop-car		Yes	4	I've already requested to receive updates.				2013-02-23	3	No, I have an incident/more incidents to log.
ORMarion	2014-09-24 16:41:37	2013-02-25	OR - Oregon	Marion	Silverton	Marion County Sheriff's Office	Jimmie Eugene Hickey	78	Male	White	Not of Hispanic or Latino origin	White		Killed	Armed	Handgun	"""In a Monday night press release, the sheriff's office described a tense scene when responding deputies arrived and spotted the suspect behind a picnic table on a small hill southwest of the park. They said the shooter opened fire with his rifle when he saw the deputies. One deputy returned fire. A few minutes later, troopers from the Oregon State Police arrived and were fired at by the shooter…	http://www.katu.com/news/local/Shooting-reported-at-Silverton-RV-park-193140091.html	Ryan Postlewait, Nick (Nicholas) Rhoades, James Andrews	Yes	5	I've already requested to receive updates.				2013-02-25	3	No, I have an incident/more incidents to log.
PADauphin	2014-09-24 16:45:41	2013-02-25	PA - Pennsylvania	Dauphin	Harrisburg	Dauphin County Crisis Response Team	Ishmael Muhammad	29	Male	Black or African American	Not of Hispanic or Latino origin	Black	2	Killed	Armed	Knife or cutting instrument	"""Muhammad, who police say appeared to be high on drugs, this afternoon took two hostages in a third-floor apartment at 121 Evergreen St. He brandished a 10- to 12-inch-long machete and threatened the hostages and police."""	http://www.pennlive.com/midstate/index.ssf/2013/01/harrisburg_police_shooting_mac.html		Yes	4	I've already requested to receive updates.				2013-01-28	7	No, I have an incident/more incidents to log.
TXDallas	2014-09-24 16:34:36	2013-02-25	TX - Texas	Dallas	Garland	Garland PD	Michael Vincent Allen	25	Male	White	Not of Hispanic or Latino origin	White	41	Killed	Unarmed	Unarmed	"""After a 30-minute pursuit with speeds reaching up to 100 mph, Allen turned into a cul-de-sac in the 3000 block of Monarch Court. That’s where police initially said Allen made a U-turn and hit a squad car as officers tried to box him in. But Tuesday’s updated account by police, confirmed by Snider, indicates that the police hit Allen’s car and then fatally shot him. """	http://www.dallasnews.com/news/community-news/garland-mesquite/headlines/20120911-garland-police-say-officer-fired-as-many-as-41-shots-at-apparently-unarmed-man-before-he-died.ece	Patrick Tuter	Yes	2	I've already requested to receive updates.				2012-08-31	1	No, I have an incident/more incidents to log.
UTDavis	2014-09-24 16:44:20	2013-02-25	UT - Utah	Davis	Farmington	Morgan County PD	Kristine Nicole Biggs	41	Female	White	Not of Hispanic or Latino origin	White		Hit	Unarmed	Unarmed	"Biggs was initially in critical condition at an Ogden hospital after being shot by a Morgan County sheriff’s deputy in the left eye -- as she crashed head-on into pursuing police cars. The chase began about 10 p.m. on Nov. 24, when a Morgan County deputy attempted to pull over the woman’s pickup truck for a broken headlight. Instead, Biggs sped away, beginning a 40-mile pursuit that ended in Dav…	http://www.sltrib.com/sltrib/news/55867504-78/biggs-county-morgan-officer.html.csp	Scott Peay	Yes	2	I've already requested to receive updates.				2012-11-24	6	No, I have an incident/more incidents to log.
UTDavis	2014-09-24 16:35:59	2013-02-25	UT - Utah	Davis	Kaysville	Utah State Patrol	Brett Max Knight	33	Male	White	Not of Hispanic or Latino origin	White		Killed	Armed	Handgun	"""Northbound I-15 remained closed Monday night and traffic was backed up for hours after a high-speed chase came to an end in an officer-involved shooting near the Layton Parkway exit. The chase ended when police stopped the man's vehicle and he got out, holding a gun and raising it in the direction of officers surrounding him, Department of Public Safety spokesman Dwayne Baird said. Officers sh…	http://www.deseretnews.com/article/865574137/I-15-chase-from-Lehi-ends-in-Kaysville-major-traffic-delays-developing.html?pg=all		Yes	4	I've already requested to receive updates.				2013-02-25	2	No, I have an incident/more incidents to log.
CALosAngeles	2014-10-10 16:24:51	2013-02-27	CA - California	LosAngeles	Long Beach	Long Beach PD	Jesse Delgadillo	21	Male	White	Hispanic or Latino origin	Hispanic		Killed	Armed	Handgun	"Long Beach Police Department Sgt. David Marander said that on at approximately 12:20AM Sunday, officers were dispatched to a report of a man with a gun in the area of Artesia Boulevard and Butler Avenue. An officer in the area quickly located a suspect matching the description and the suspect immediately ran from the officer. "During the chase, the suspect produced a handgun and an officer invol…	http://lbpost.com/news/2000002191-man-dies-after-being-shot-during-confrontation-with-long-beach-police		Yes	3	I've already requested to receive updates.				2013-04-28	1	No, I have an incident/more incidents to log.
KYWarren	2014-10-10 16:38:29	2013-02-27	KY - Kentucky	Warren	Bowling Green	Warren County Sheriff's Office	Brandon Bradshaw	27	Male	White	Not of Hispanic or Latino origin	White		Killed	Unarmed	Unarmed	"""A man who inspires kids to be active in the arts is fighting for his life at Vanderbilt University Medical Center in Nashville after being shot Tuesday by an off-duty Warren County Sheriff’s Office court security officer in a parking lot on U.S. 31-W By-Pass. Brandon Bradshaw, 27, of Bowling Green, a former Warren County constable, was shot by off-duty Warren County Sheriff’s Office court secu…	http://www.bgdailynews.com/news/local/off-duty-officer-shoots-man/article_44ced612-8108-11e2-a7f2-001a4bcf887a.html		Yes	1	I've already requested to receive updates.				2013-02-26	1	No, I have an incident/more incidents to log.
OKComanche	2014-10-10 16:40:38	2013-02-27	OK - Oklahoma	Comanche	Lawton	Lawton PD	Demetrius Miller	22	Male	Black or African American	Not of Hispanic or Latino origin	Black		Hit	Armed	Handgun	"One of the suspects, 22-year-old Demetrius Miller, was wounded during the altercation, as well. LPD said he's still in the hospital right now. They did not release his condition. According to OSBI, Miller has been arrested for the shooting that wounded Officer Eric Weatherly. LPD said Miller has never been booked into their jail, so they do not have his mugshot at this time."	http://www.kswo.com/story/21414841/suspect-still-on-the-loose-after-officer-involved-shooting		Yes	4	I've already requested to receive updates.				2013-02-27	1	No, I have an incident/more incidents to log.
CAAlameda	2014-10-16 16:29:14	2013-02-28	CA - California	Alameda	Oakland	Oakland Unified School District Police Department	Raheim Brown	20	Male	Black or African American	Not of Hispanic or Latino origin	Black	7	Killed	Armed	Knife or cutting instrument	"Bellusa and his partner, Sgt. Barhin Bhatt, approached Brown on the night of Jan. 22, 2011 near Skyline High School after they found him sitting in what was believed to be a stolen car. Bhatt fired seven shots at Brown after Brown allegedly stabbed Bellusa with a screwdriver."	http://www.nbcbayarea.com/news/local/Exclusive-Oakland-School-Cop-Calls-Shooting-Investigation-Compromised--194114051.html	Barhin Bhatt, Jonathan Bellusa	Yes	1	I've already requested to receive updates.				2011-01-22	1	No, I have an incident/more incidents to log.
CASanBernardino	2014-08-22 10:18:52	2013-03-01	CA - California	SanBernardino	Yucaipa	San Bernardino Sheriff's Office	Brian Forrett		Male	White	Not of Hispanic or Latino origin	White	2	Hit	Armed	Firearm; not stated	Deputy stopped Forrett for questioning as a suspicious person had been reported. Forrett would not comply with request to stop and acted aggressively towards officer, who tased him twice. When Forrett pulled gun and fired, deputy returned fire and struck him twice. Forrett fled in his vehicle and was found dead the next day of an apparent suicide.	http://www.sbsun.com/general-news/20131205/deputys-shooting-of-riverside-man-in-yucaipa-ruled-as-justified	Deputy Shadia Adham	Yes	4	No thanks.
NJUnion	2014-08-22 10:34:31	2013-03-01	NJ - New Jersey	Union	Roselle	Roselle Police Department	Sharif Tankard	34	Male	Black or African American	Not of Hispanic or Latino origin	Black		Hit	Unarmed	Unarmed	Tankard allegedly reached for a detective's gun and threatened to shoot him which is when he was shot by the detective's partner. The prosecutor's office later declined to press charges on Tankard but still noted that the use of force was justified.	http://www.nj.com/union/index.ssf/2013/06/roselle_man_shot_by_elizabeth_police_will_not_face_charges.html		Yes	2	No thanks.
TXTravis	2014-08-22 10:03:27	2013-03-01	TX - Texas	Travis	Austin	Austin Police Department	John Shaefer	70	Male	White	Not of Hispanic or Latino origin	White		Killed	Armed	Handgun	Victim called police to report that he had shot a pit bull that was not his in his back yard. Police arrived and were interviewing victim when they noticed a gun tucked into his waistband. When asked to hand it over he refused. Officer tried to take gun, victim pulled it and pointed it at police who shot and killed him.	http://www.statesman.com/news/news/police-respond-to-officer-involved-shooting-in-nor/nWdY9/	Officer Jonathan Whitted	Yes	2	Add me!
CAAlameda	2014-08-22 10:24:59	2013-03-02	CA - California	Alameda	Union City	Union City Police Department	Amos G Smith	26	Male	Black or African American	Not of Hispanic or Latino origin	Black		Killed	Armed	Handgun	Smith fled on foot after a traffic stop. Did not comply to officers' commands, reached into his waistband and pulled out a handgun and pointed it at officers, who fired at and killed Smith.	http://patch.com/california/unioncity/victim-identified-in-fatal-officer-involved-shooting#.U_dRafldV8F		Yes	4	No thanks.
CASantaClara	2014-08-22 10:12:02	2013-03-02	CA - California	SantaClara	San Jose	San Jose Police Dept	Ronald Aduddel	25	Male	White	Not of Hispanic or Latino origin	White		Killed	Unarmed	Unarmed	Addudel rammed a marked police car which resulted in high speed chase. During the chase, officers thought they saw him holding a gun. When he stopped and exited the vehicle, he was shot and killed because his hand was at his waistband. No weapon was recovered.	http://www.ktvu.com/news/news/crime-law/police-investigate-fatal-officer-involved-shooting/nWfhf/		Yes	1	No thanks.
WACowlitz	2014-08-22 10:15:34	2013-03-02	WA - Washington	Cowlitz	Kelso	Kelso Police Department	Jesse Ryan McMillan	26	Male	White	Not of Hispanic or Latino origin	White		Killed	Armed	Handgun	While attempting to locate a hit and run driver, officers were on the front porch of victim's mother's house when victim ran from back bedroom and fired at officers, hitting one in the leg. Officers returned fire and killed him.	http://www.kgw.com/story/news/2014/07/25/12466108/	Kelso police officer Ralph Hines and Cowlitz County deputy Danny O'Neill	Yes	5	No thanks.
ARFaulkner	2014-08-22 11:15:26	2013-03-03	AR - Arkansas	Faulkner	Conway	Conway Police Department	John M Raines IV	21	Male	White	Unknown	White	7	Hit	Armed	Knife or cutting instrument	Police responded to an assault with a knife. When they arrived, they spotted Raines with a knife. Raines refused to comply with requests to drop the weapon. He was tased, but still advanced when officers shot him several times.	http://www.arkansasonline.com/news/2013/mar/04/four-conway-officers-placed-leave-after-sunday-sho/?f=news	Rachel Hanson, Andrew Burningham, James Burroughs and Steven Culliford	Yes	3	No thanks.
CAAlameda	2014-08-22 10:27:49	2013-03-03	CA - California	Alameda	Hayward	Hayward Police Department	Shawn Joseph Jetmore Stoddard-Nunez	19	Male	White	Unknown	White	4	Killed	Unarmed	Unarmed	Stoddard-Nunez was riding in the passenger seat with a friend when police attempted to stop the car. The driver rammed a police cruiser and the officer fired into the vehicle and hit Stoddard-Nunez twice, killing him.	http://www.ktvu.com/news/news/crime-law/one-dead-after-hayward-hit-and-run-results-officer/nWfsW/		Yes	2	No thanks.
TXHarris	2014-08-22 12:02:49	2013-03-03	TX - Texas	Harris	Houston	Houston Police Department	Keith Earl Turner	45	Male	Black or African American	Not of Hispanic or Latino origin	Black		Hit	Armed	Handgun	Police responded to susicious vehicle when Turner exited car and began approaching officers. Turner pulled a handgun and began shooting, officers returned fire, striking Turner.	http://www.yourhoustonnews.com/pearland/news/armed-suspect-shot-at-west-airport-boulevard/article_ed5cf598-d1e9-5624-8e00-474aeddd055f.html	Officers S. Howze and B. Russell, Jr	Yes	5	I've already requested to receive updates.
NCCabarrus	2014-08-22 11:23:34	2013-03-04	NC - North Carolina	Cabarrus	Concord	US Marshals Service, FBI	Antony De'Sean Meeks	22	Male	Black or African American	Not of Hispanic or Latino origin	Black		Killed	Armed	Firearm; not stated	US Marshals and FBI were attempting to arrest Meeks for several open warrants in his home, when they observed him at a back window with a gun. He climbed out of the window and officers fired at and killed him.	http://www.hickoryrecord.com/independent_tribune/news/article_f1454a2a-84e1-11e2-9c02-0019bb30f31a.html		Yes	3	No thanks.
ORMultnomah	2014-08-22 11:53:14	2013-03-04	OR - Oregon	Multnomah	Portland	Portland Police Department	Santiago A Cisneros III	32	Male	White	Hispanic or Latino origin	Hispanic		Killed	Armed	Shotgun	Police encountered Cisneros at the top of a parking garage where he opened fire on them with a shotgun. Police returned fire, striking him multiple times and killing him.	http://portlandtribune.com/pt/9-news/129335-suspect-identified-in-officer-involved-shooting		Yes	5	No thanks.
NMBernalillo	2014-08-28 12:04:43	2013-03-05	NM - New Mexico	Bernalillo	Albuquerque	Albuquerque Police Department	Parrish Clayton Dennison	41	Male	White	Not of Hispanic or Latino origin	White	4	Killed	Armed	Handgun	Dennison ran when police attempted to stop him for a robbery. He pointed his gun at officers several times during the chase. He attempted to kick in the door to a hotel and turned towards the officers, which is when they fired, released dogs and flashbangs. Witnesses say he never pointed a gun at police.	http://www.abqjournal.com/175386/news/updated-apd-officers-shoot-kill-armed-man.html	Perdue; Aragon; Sedler	Yes	3	I've already requested to receive updates.				2013-03-05	7	No, I have an incident/more incidents to log.
NYEssex	2014-08-28 11:24:31	2013-03-05	NY - New York	Essex	Lewis	New York State Police	Richard J Aubin	28	Male	White	Not of Hispanic or Latino origin	White	3	Killed	Unarmed	Unarmed	Aubin failed to pull over for speeding. The resulting police chase ended with spike strips being deployed and Aubin abandoning his vehicle. He ran into a wooded area pursued by police officers. There was a struggle, pepper spray was deployed and Aubin allegedly reached for the officer's gun. Other office opened fire and killed Aubin.	http://www.adirondackdailyenterprise.com/page/content.detail/id/535844/Police-shoot--kill-AuSable-Forks-man-in-North-Hudson.html?nav=5047	Leston W. Sheeley	Yes	3	I've already requested to receive updates.				2013-03-05	3	No, I have an incident/more incidents to log.
MIHuron	2014-08-28 12:24:38	2013-03-06	MI - Michigan	Huron	Sebewaing	Huron County Sheriff's Department	George Barrett	66	Male	White	Not of Hispanic or Latino origin	White		Hit	Armed	Firearm; not stated	Officers were investigating a "shots fired" 911 call when Barrett exited a house nearby and began firing at them. Officers fired back, wounding him.	http://www.mlive.com/news/bay-city/index.ssf/2013/03/michigan_state_police_investig_8.html		Yes	5	I've already requested to receive updates.				2013-03-05	1	This is the first incident I am logging.
TXElPaso	2014-08-22 11:53:15	2013-03-08	TX - Texas	ElPaso	El Paso	El Paso Police Department	Daniel Saenz	37	Male	White	Hispanic or Latino origin	Hispanic	1	Killed	Unarmed	Handgun	Daniel Saenz was shot by an El Paso Police officer while handcuffed out site the jail. Here is a link to a story that includes a video of the shooting. http://www.elpasotimes.com/news/ci_25977240/city-releases-video-fatal-police-shooting-el-paso	http://www.elpasotimes.com/news/ci_25977240/city-releases-video-fatal-police-shooting-el-paso	Jose Flores	Yes	1	Add me!	Salvador Guerrero	sguerrero@elpasotimes.com	SalDGuerrero
FLMiamiDade	2014-08-22 18:48:08	2013-03-12	FL - Florida	MiamiDade	West Kendall	Miami-Dade Police Department	Juan Luis Rodriguez	44	Male	Unknown	Hispanic or Latino origin	Hispanic		Killed	Armed	Vehicle	Police (not sure how many officers) responded to a report of a suspicious-looking man looking into a vehicle window just before midnight. They questioned the man and tried to handcuff him, when he reportedly broke free and got into their cruiser. He reportedly tried to run the officers over with the cruiser, when one shot and killed him. The victim's family released a statement saying he had rece…	http://usgunviolence.wordpress.com/2013/03/12/killed-juan-luis-rodriguez-miami-dade-fl/		Yes	3	I've already requested to receive updates.
TXDallas	2014-08-20 12:28:16	2013-03-14	TX - Texas	Dallas	Dallas	Dallas Police Department	Tyrique Rashad Johnson	21	Male	Black or African American	Unknown	Black	2	Killed	Armed	Firearm; not stated		http://www.myfoxtwincities.com/story/21638754/shots-fired-during-club-fight and http://www.myfoxtwincities.com/story/21638754/shots-fired-during-club-fight
OHCuyahoga	2014-08-22 15:52:54	2013-03-17	OH - Ohio	Cuyahoga	Solon	Solon Police Department	Kevin M. Bailey	22	Male	Black or African American	Unknown	Black	4	Killed	Armed	Handgun	Suspect had warrants for his arrest and fled a traffic stop, which began a high speed car chase. Suspect shot at two police cars, breaking glass of two police cars and striking and wounding one officer.	http://fox8.com/2013/03/17/solon-police-coroner-on-scene-after-chase/	Nicholas Kline; Steven Davis	Yes	5	No thanks.
ALElmore	2014-08-20 15:43:32	2013-03-19	AL - Alabama	Elmore	Deatsville	Elmore County Sheriff's Office	Jeremy A. Acre	35	Male	White	Not of Hispanic or Latino origin	White	1	Killed	Armed	Handgun	Killed during a welfare check on trumped up, exaggerated accusations. Officers arrived to determine if the victim's wife was in danger, he and she both said she was not, and asked them to leave. As Jeremy attempted to close the door, the officers pushed the door open and invaded the home.	http://blog.al.com/montgomery/2013/03/off-duty_montgomery_firefighte.html	Jason Chambers
CALosAngeles	2014-08-20 16:35:39	2013-03-19	CA - California	LosAngeles	Los Angeles	Los Angeles Police Department	David Martinez		Male	Unknown	Hispanic or Latino origin	Hispanic		Killed	Unarmed	Unarmed	Police opened fire last week on David Martinez after the Echo Park resident pointed what appeared to be a gun at officers responding to a report of an armed gang member who had fired two shots. A search immediately after the shooting failed to find the gun.	http://www.theeastsiderla.com/2013/03/no-weapon-found-at-scene-of-officer-involved-echo-park-shooting/
INAllen	2014-08-20 23:43:27	2013-04-27	IN - Indiana	Allen	Fort Wayne	Fort Wayne Police Department	Tavontae Jamar or "TJ" Haney	19	Male	Black or African American	Unknown	Black		Killed	Armed	Firearm; not stated		http://news-sentinel.com/apps/pbcs.dll/article?AID=/20140818/NEWS/140819636	Cameron A. Norris and John D. Drummer	Yes
TXGregg	2014-08-20 23:03:56	2013-05-09	TX - Texas	Gregg	Longview	Longview Police Department	Candace Jackson	38	Female	White	Not of Hispanic or Latino origin	White		Killed	Armed	Shotgun	Officers responded to a "check welfare" call placed by victim's roommate. Victim, a 38-year-old nurse, then allegedly exchanged gunfire with police in a several-hours standoff. “Police spent several hours attempting to interact with Jackson during which numerous shots were fired at officers,” Dorrough wrote in a statement about the grand jury’s decision. “Jackson was shot as she stood at the fron…	http://www.americanownews.com/story/22707080/longview-pd-cleared-of-any-wrongdoing-in-nurses-death	Danny Stroud, Kerry Higginbotham	Yes
MNHennepin	2014-08-20 13:53:53	2013-05-10	MN - Minnesota	Hennepin	Minneapolis	Minneapolis Police Department	Terrence Franklin	22	Male	Black or African American	Unknown	Black	10	Killed	Armed	MP5 Machine Gun	A police investigation determined that Franklin, who had broken into the house at 2717 Bryant Av. S. after fleeing police, charged at officers when he was discovered hiding behind a water heater in the home’s cramped and darkened basement. A violent brawl at close quarters erupted in gunfire when Franklin grabbed an MP5 machine pistol hanging from the shoulder of one of the officers and pulled th…	http://www.startribune.com/local/blogs/258472851.html	Lucas Peterson
FLOkaloosa	2014-08-27 17:18:27	2013-05-15	FL - Florida	Okaloosa	Shalimar	Okaloosa County Sheriff’s Office	Eric Jacob Moore	34	Male	White	Unknown	White	2	Hit	Armed	Knife or cutting instrument	Eric Jacob Moore was driving erratically. He fled on foot once the traffic stop was underway, after giving the officer his ID. He hid in bushes, and the officer took out her weapon. When he emerged from the bushes and went towards her, swung at her, and, she shot him twice. He then kept running and was tasered by another officer, Deputy Adam Fitchett.	http://www.sheriff-okaloosa.org/wp-content/pdfs/newsreleases/2013/Jul.%2023%20-%20SAO%20News%20Release%20-%20OCSO%20Deputy%20Justified%20in%20Shooting%20Incident.pdf	Deputy Elisa Tino	Yes	5	Add me!	Intiya	intiya@gmail.com		2013-05-15	1	This is the first incident I am logging.
IABlackHawk	2014-08-27 17:30:42	2013-05-15	IA - Iowa	BlackHawk	Waterloo	Waterloo Police	Richard Anderson	39	Male	White	Not of Hispanic or Latino origin	White		Hit	Armed	Knife or cutting instrument	A friend called in a suicide risk, and then when officers arrived he pulled a knife and was shot. He survived in all the reports I found. I could not find conclusive investigation reports. they called it a "suicide by cop" case.	http://wcfcourier.com/news/local/suicide-by-cop-familiar-to-police/article_63569dc1-fbd8-5705-88ea-6c7ff1df17a9.html	Officer Thomas Frein	Yes	3	I've already requested to receive updates.				2013-05-15	1	No, I have an incident/more incidents to log.
NYNassau	2014-08-20 12:52:44	2013-05-17	NY - New York	Nassau	Hempstead	Nassau County Police Department	Dalton Smith	30	Male	Black or African American	Unknown	Black	8	Killed	Armed	Handgun	Career criminal Dalton Smith was gunned down during a robbery attempt that also saw the death of innocent bystander Andrea Rebello by hands of the NCPD.	http://www.nydailynews.com/new-york/hofstra-gunman-identified-thug-wanted-parole-violation-article-1.1347916	Nikolas Budimlic
NYNassau	2014-08-20 12:50:27	2013-05-17	NY - New York	Nassau	Hempstead	Nassau County Police Department	Andrea Rebello	21	Female	White	Unknown	White	8	Killed	Unarmed	Handgun	Andrea Rebello was a 21-year old Hofstra University student who was gunned down in the crossfire of a home robbery.	http://www.nydailynews.com/new-york/hofstra-gunman-identified-thug-wanted-parole-violation-article-1.1347916	Nikolas Budimlic
WIDane	2014-08-22 16:27:35	2013-05-17	WI - Wisconsin	Dane	Madison	Madison Police Department	Brent Brozek	43	Male	White	Not of Hispanic or Latino origin	White	11	Killed	Armed	Sword	Victim had a history of mental illness. "Brozek had been in a standoff with police earlier in the day when he refused to be evicted out of his foreclosed home." from: http://host.madison.com/news/local/crime_and_courts/official-review-clears-madison-officers-involved-in-fatal-shooting-of/article_4adf4961-58df-58d3-92ac-3a5844f3e3d1.html	http://host.madison.com/news/local/crime_and_courts/man-fatally-shot-by-police-had-history-of-mental-illness/article_0c2544c7-1c0f-51db-9d97-c84f4cbd9c3e.html	Officers Ryan Orvis, Ryan Finnegan, and Scott Templeton	Yes	2	I've already requested to receive updates.
TXGregg	2014-08-20 23:14:52	2013-05-20	TX - Texas	Gregg	Longview	Longview Police Department	Jose Sifuentes	28	Male	White	Hispanic or Latino origin	Hispanic	3	Killed	Unarmed	car	Police responded to a multi-vehicle traffic accident and then started chasing the victim, which fled the scene in a Mitsubishi in pursuit. Police stopped the car with a spike strip and it veered towards a Longview Officer Kerry Higginbotham, striking him, "then turned 180 degrees and drove back towards him," Higginbotham said. The officer fired three shots, two of which struck Sifuentes, who died…	http://www.news-journal.com/news/police/longview-officer-fatally-shoots-suspect-after-chase/article_339d608e-3b23-5058-bcfa-5e1261b9c39c.html	Kerry Higginbotham	Yes
CALosAngeles	2014-08-21 23:32:27	2013-05-21	CA - California	LosAngeles	Boyle Heights	Los Angeles Police Department	William Alexander Mejia	18	Male	White	Hispanic or Latino origin	Hispanic		Killed	Armed	Handgun	William Alexander Mejia, an 18-year-old Latino, was killed in an officer-involved shooting on Tuesday, May 21 in the 300 block of South Gless Street in Boyle Heights, according to Los Angeles County coroner’s records. Officers were on patrol shortly before midnight near the intersection of South Gless and East 3rd streets when they spotted a known gang member in the area carrying a revolver, acco…	http://usgunviolence.wordpress.com/2013/05/21/killed-william-alexander-mejia-los-angeles/		Yes	2
CASanDiego	2014-08-20 13:57:00	2013-05-22	CA - California	SanDiego	Vista	San Diego Sheriff's Office	Anthony Garcia	19	Male	White	Hispanic or Latino origin	Hispanic	1	Hit	Unarmed	Unarmed	Full disclosure: I am an attorney for the victim. The information below is from the police reports and witness statements. I'd be happy to email the police reports, investigations and witness statements if Deadspin would like to review the evidence itself. Police were called because a neighbor believed 4 teenagers were smoking pot in an apartment complex's laundry room. The sheriff's office respo…	http://www.nbcsandiego.com/news/local/Shots-Fired-in-Vista-Primrose-Avenue-208596951.html	Deputy M Storms (Badge 6757)
CASanDiego	2014-08-22 10:46:02	2013-05-24	CA - California	SanDiego	San Diego	San Diego Police Department	Adolfo Vargas Tovar	47	Male	Unknown	Hispanic or Latino origin	Hispanic		Killed	Armed	Shotgun	"A man suspected of going on a crime spree in Bay Terraces before being fatally shot by officers on Friday has been identified by the Medical Examiner as 47-year-old Adolfo Vargas Tovar from National City." "A 56-year-old woman named Cecilia told 10News the suspect knocked on her door and when she opened it, he told her, "Help me, they are trying to shoot me." "Police are still searching for his …	http://www.10news.com/news/gas-station-robbery-reported-in-bay-terraces-area-052413		Yes	2	No thanks.
CTFairfield	2014-08-20 15:49:07	2013-05-24	CT - Connecticut	Fairfield	Fairfield	Ridgefield Police Department	John Valluzzo	119	Male	White	Not of Hispanic or Latino origin	White	2	Killed	Armed	Handgun	Man shot in his home by Ridgefield CT police officer after being called to the home	http://www.theridgefieldpress.com/18782/new-information-on-police-shooting-revealed/	Officer Jorge Romero
MIGenesee	2014-08-21 04:11:32	2013-05-25	MI - Michigan	Genesee	Mt. Morris Township	Michigan State Police	Gary Hatcher	26	Male	Black or African American	Not of Hispanic or Latino origin	Black		Killed	Unarmed	Unarmed	MSP Officer stated that after he pulled Hatcher over for a traffic stop and fled, Hatcher allegedly went for the officer's primary weapon, after which he was shot and killed by the MSP officer. Additional info: http://usgunviolence.wordpress.com/2013/page/29/	http://www.mlive.com/news/flint/index.ssf/2013/05/michigan_state_trooper_involve.html		Yes
VAAlbemarle	2014-08-20 15:18:36	2013-05-26	VA - Virginia	Albemarle	Charlottesville	Albermarle County Police Department	Josue Salinas Valdez	38	Male	Unknown	Hispanic or Latino origin	Hispanic	1	Hit	Unarmed	Personal weapon (hands, fists, feet, etc.)	Officers Underwood and Herring arrived at Valdez's home to arrest him for hit and run. Officers found Valdez to be drunk and an altercation ensued. Valdez punched Underwood three times in the face during the dispute, according to court records. Police say Valdez grabbed Underwood after he and Herring approached Valdez on the porch. Herring used a stun gun on Valdez twice before Valdez ran at Unde…	http://www.readthehook.com/109833/officers-cleared-birdwood-court-shooting	William Underwood
PAPhiladelphia	2014-08-20 15:00:40	2013-05-29	PA - Pennsylvania	Philadelphia	Philadelphia	Philadelphia Police Department	Kyree Johnson	22	Male	Black or African American	Not of Hispanic or Latino origin	Black	9	Killed	Armed	Handgun	Officer pulls up behind a car. Moments later passengers in the car exit and run away from the vehicle. Driver gets out of the car and is shooting at fleeing passengers. Driver does not realize a police officer is behind him. Officer exits his vehicle and fires what appears to be nine shots at the driver, killing him.	http://abclocal.go.com//story?section=news/local&id=9120669	Not Identified
MASuffolk	2014-08-20 16:34:33	2013-06-02	MA - Massachusetts	Suffolk	Dorchester	Boston Police Department	Ross Batista	38	Male	Black or African American	Hispanic or Latino origin	Black		Killed	Armed	Handgun	Victim was in the passenger seat of a car when he exchanged shots with a man on the sidewalk at about 1 a.m. June 2. Officers heard the shots, ran to the scene. Police said Batista refused to get out of the car, and an officer shot him when he jumped into the back seat and reached for a gun. Conley said Batista then got out and fired at two retreating officers before another officer shot him. He …	http://www.bostonglobe.com/metro/2014/07/25/officers-not-charged-fatal-confrontation-mattapan/QwGZ6eZqskTsxwxV6UPouK/story.html	Kevin Rooney, Stephen Puopolo
TXTravis	2014-08-21 19:47:48	2013-06-26	TX - Texas	Travis	Austin	Austin Police Department	Larry Eugene Jackson Jr.	32	Male	Black or African American	Not of Hispanic or Latino origin	Black	1	Killed	Unarmed	Unarmed	Detective Charles Kleinert responded to a call in regards to a bank robbery - where he encountered Larry Jackson Jr. Jackson continued to give a false identity when asked who he was and then he ran. Witnesses say Kleinert acted "out of control" and did not correctly identify himself as an officer. He chased Larry Jackson Jr under a bridge where Jackson was shot once - in the back of the head. Jac…	http://www.statesman.com/news/news/crime-law/grand-jury-decision-expected-in-larry-jackson-shoo/nftTQ/	APD Detective Charles Kleinert	Yes	1
PAAllegheny	2014-08-20 18:58:55	2013-06-29	PA - Pennsylvania	Allegheny	Philadelphia	Philadelphia Police 39th District	Markim Summers		Male	Black or African American	Unknown	Black	2	Hit	Unarmed	Unarmed	The victim was naked and apparently on drugs.	http://www.nbcphiladelphia.com/news/local/Naked-Man-Jumps-on-Police-Car-Shot-by-Officers-Police-213656631.html
NMDonaAna	2014-08-20 14:36:20	2013-07-02	NM - New Mexico	DonaAna	Las Cruces	Las Cruces Police Department	Jose Ramon Estrada	37	Male	Unknown	Hispanic or Latino origin	Hispanic		Killed	Armed	Toy/fake/non-lethal gun	officers responded to report of man with gun, suspect appeared to be holding an assault rifle. Three officers on scene - at least one fired a non-lethal ("bean bag") projectile at suspect. Suspect then appeared to point assault rifle at officers, and three officers fired at suspect, hitting him at least once. Suspect died of wound - assault rifle later determined to be a pellet gun.	http://www.lcsun-news.com/ci_23620837/family-police-shooting-victim-seeks-answers	multiple
CALosAngeles	2014-10-15 22:35:16	2013-07-03	CA - California	LosAngeles	Inglewood	Inglewood Police Dept.	unkown	30	Male	Unknown	Hispanic or Latino origin	Hispanic	3	Hit	Armed	Handgun		http://www.cityofinglewood.org/pdfs/police/PR/IPD_PR_OIS_07-03-13.pdf		Yes	5	No thanks.				2013-07-03	1	This is the first incident I am logging.
KYJefferson	2014-08-23 13:36:13	2013-07-07	KY - Kentucky	Jefferson	Louisville	Jefferson County Police Department	Carlos D. Runyon	30	Male	Black or African American	Unknown	Black		Killed	Armed	Firearm; not stated	Officers responded to alarms at a KFC. In the KFC, Runyon had a gun and tied-up hostages. Before SWAT could arrive, Runyon ran and led a foot chase outside before firing at officers. He was shot and killed, reportedly by a single officer.	http://www.whas11.com/news/crimetracker/Man-shot-killed-in-altercation-with-police-identified-214609741.html	Russ Carver	Yes		I've already requested to receive updates.
PAIndiana	2014-08-22 17:09:34	2013-07-07	PA - Pennsylvania	Indiana	Brush Valley Township	Pennsylvania state police	Gary L. Wissinger	55	Male	White	Unknown	White	6	Killed	Armed	Handgun	Police responded to a report of a fight between a husband and wife, and they encountered Wissinger at the front door. "the suspect produced a handgun, proceeded to point that handgun in the direction of our troopers ... ultimately resulting in our troopers opening fire on the suspect," Ruled justified homicide by District Attorney	http://www.wtae.com/news/local/fatal-policeinvolved-shooting-in-indiana-county/20874970#!bInw6U	Chad Corbett	Yes		Add me!	Colleen	meancolleenjuniper@gmail.com
TXPotter	2014-08-22 21:11:15	2013-07-07	TX - Texas	Potter	Amarillo	Amarillo police	-German Dominguez Mata	35	Male	Unknown	Hispanic or Latino origin	Hispanic		Killed	Armed	Toy/fake/non-lethal gun	Mata pulled a realistic replica pistol out of his waistband and pointed it at officers. One of the officers fired his weapon and struck the suspect. Mata was taken to a hospital and died. Officer Matthews was placed on administrative leave. The other officer involved was Officer Carmella Smith.	https://nixle.us/alert/5029652/	Ricky Matthews	Yes		I've already requested to receive updates.
GAChatham	2014-08-21 20:01:47	2013-07-08	GA - Georgia	Chatham	Pooler	Pooler Police, Garden City police, Bloomingdale police	Lance Clay	50	Male	White	Not of Hispanic or Latino origin	White		Killed	Armed	Firearm; not stated	Police were called to the scene for what the Georgia Bureau of Investigation calls "threatening issues" by Clay, who was inside the home. Clay fired several shots at officers before coming out of the home with a gun in his hand. An officer shot and killed him.	http://www.wsav.com/story/22795016/police-involved-shooting-leaves-man-dead		Yes
ARPulaski	2014-08-21 15:11:21	2013-07-09	AR - Arkansas	Pulaski	Little Rock	Little Rock police	Antoine Wilbert	27	Male	Black or African American	Not of Hispanic or Latino origin	Black	2	Hit	Unarmed	Unarmed	Officers got a report that a woman's ex-husband was armed with a handgun. Wilbert was outside with a denim shirt wrapped around his hand. Police say he pointed his hand at officers as if he had a gun. Several shots were fired at him by police. He was hit twice.	http://www.fox16.com/mostpopular/story/Little-Rock-Police-Officer-Shoots-Suspect-in/d/story/9FZoyaCFLkSrg0yCo57RQA		Yes
FLDuval	2014-08-22 01:58:29	2013-07-09	FL - Florida	Duval	Jacksonville		Herman Isiah Pickens	24	Male	Black or African American	Unknown	Black	2	Hit	Armed	Handgun	Pickens was in possession of a loaded handgun when he was shot twice by an undercover SWAT officer. Pickens had the gun concealed in a black bag and had his hand in the bag, and when he turned and faced officers, Detective M.E. Campanero fired at him. Officers suspected Pickens of several crimes, including a murder, and he survived his wounds to be charged for that murder months later. http://jac…	http://www.news4jax.com/news/police-cvs-shooter-same-as-mojo-shooter/20952182?ahah=1&colConfig=hc=4004348,475776&imageOverlay=true&postMode=ajax&useDefaultImage=true&view=asTeaser	Detective M.E. Campanero	Yes
NJEssex	2014-08-21 17:36:08	2013-07-09	NJ - New Jersey	Essex	Belleville	Belleville police	Dante Cespedes	40	Male	White	Unknown	White	30	Killed	Armed	Knife or cutting instrument	Officers were responding to an assault complaint lodged by Cespedes' wife. Cespedes lunged at police with knives. Officers Quinn and Mollineaux each fired 14 times, while Dox fired twice. Cespedes was hit about two dozen times.	http://www.nj.com/essex/index.ssf/2013/09/woman_files_multi-million_dollar_suit_against_belleville_after_police_shot_husband_24_times.html	Angelo Quinn, Charles Mollineaux, Matthew Dox	Yes
CASanJoaquin	2014-08-21 12:04:35	2013-07-10	CA - California	SanJoaquin	Stockton	San Joaquin County sheriff	Deandre Adams	22	Male	Black or African American	Unknown	Black		Hit	Armed	Rifle	After running from a crime-prevention stop by Sheriff's deputies, Adams shot at deputy with an assault rifle. Deputy shot him multiple times. Adams survived his injuries. There is a report of the deputy receiving an Officer Of The Year award for the arrest, and for giving Adams first aid after the shooting, here: http://calaveras.networkofcare.org/ps/news-article-detail.aspx?id=50209	http://www.recordnet.com/apps/pbcs.dll/article?AID=/20130716/A_NEWS/307160313	Khamkhoune Kannalikham	Yes
AZMaricopa	2014-08-21 12:35:14	2013-07-11	AZ - Arizona	Maricopa	Phoenix		Luis Alberto Flores	31	Male	Unknown	Hispanic or Latino origin	Hispanic		Killed	Armed	Handgun	Police were responding to 911 call from an apartment tenant. Several blocks from the apartment, they found Flores, who pulled a gun from his waistband and pointed it at officers. They shot him several times, he shot from where he lay on the ground, officers fired again. Flores died of his wounds.	http://www.azfamily.com/news/Officers-shoot-kill-suspect-outside-Phoenix-apartment-complex-215068401.html		Yes
IAPolk	2014-08-21 02:26:33	2013-07-11	IA - Iowa	Polk	Des Moines	Des Moines police	Tyiuan Tucker	37	Male	Black or African American	Unknown	Black	1	Hit	Unarmed	Unarmed	Plainclothes detective shot Tucker while trying to intervene in a domestic assault. Tucker was shot in the abdomen and taken to hospital with non-life threatening injuries.	http://blogs.desmoinesregister.com/dmr/index.php/2013/07/11/des-moines-detective-shoots-domestic-assault-suspect/article	Yanira Scarlett	Yes
NVWashoe	2014-08-21 00:52:16	2013-07-11	NV - Nevada	Washoe	Reno	Reno and Sparks police	Kenneth Jewel Stafford	27	Male	Black or African American	Unknown	Black	22	Killed	Armed	Shotgun	Stafford, reportedly suicidal and suffering PTSD, winds up in someone's backyard with a shotgun. 5 officers shoot 22 rounds, hitting him 14 times.	http://www.mynews4.com/mostpopular/story/D-A-finds-officer-involved-shooting-justified/ki13lGN6EEGUXc08uOC6Aw.cspx		Yes
OKOklahoma	2014-08-21 00:15:12	2013-07-11	OK - Oklahoma	Oklahoma	Oklahoma City	Oklahoma City police	Brian Simms Jr.	24	Male	Black or African American	Unknown	Black		Killed	Armed	Handgun	Uniformed, off-duty officers working security outside a concert venue, found Simms asleep or passed out in a car, with a gun in his waistband. They ordered him to put the gun away, he did not, he was shot and killed.	http://www.news9.com/story/22829814/new-details-in-deadly-officer-involved-shooting-in-downtown-okc	Sgt. Paul Galyon	Yes
CAVentura	2014-08-20 23:42:59	2013-07-12	CA - California	Ventura	Oak View	Ventura County Sheriff	Daniel Cur­tis Houfek	42	Male	White	Unknown	White		Killed	Armed	Handgun	Houfek pointed a handgun at deputies, they shot him and called emergency personnel, Houfek died at scene of gunshot wounds. As an aside, the Anti-Defamation League reported Houfek to be a "promi­nent local white suprema­cist" http://blog.adl.org/extremism/ventura-county-deputies-kill-white-supremacist-who-pointed-handgun	http://www.vcstar.com/news/authorities-identify-man-shot-to-death-by-in-oak		Yes
UTSaltLake	2014-08-20 17:44:59	2013-07-14	UT - Utah	SaltLake	Salt Lake City	Utah Highway Patrol	Kody Scott Sturgeon	35	Male	White	Unknown	White	2	Hit	Armed	Toy/fake/non-lethal gun	Man fled traffic stop, was not pursued but a search went out. Man was found by troopers hiding in storage unit. Man showed gun to troopers three times, did not fire. Trooper shot seven times, hit man twice, hand and leg. Later, man's gun was ID'd as air pistol.	http://www.sltrib.com/sltrib/news/57068519-78/sturgeon-gill-sullivan-wrote.html.csp	Mitch Sullivan
ARPulaski	2014-08-20 18:53:25	2013-07-15	AR - Arkansas	Pulaski	Little Rock	Little Rock Police Department	Deon Lamar Williams	26	Male	Black or African American	Not of Hispanic or Latino origin	Black	5	Killed	Armed	Handgun	Deon Williams was pulled over for driving a car with expired plates that the officers thought had been stolen. After being pulled over Williams tried to walk away, but the officer thought he saw a weapon in his waistband and asked Williams to come over to the police car. At this point Williams started running and the police officers gave chase. When one officer cornered him, he said he saw a gun …	http://www.katv.com/story/22843795/suspect-killed-in-little-rock-officer-involved-shooting
CALosAngeles	2014-08-23 18:59:28	2013-07-16	CA - California	LosAngeles	Los Angeles	LAPD	Juan Diaz Chavez	37	Male	White	Unknown	White		Killed	Armed	Handgun	Plainclothes officers when in an unmarked car monitoring a nearby memorial vigil when Chavez crossed the street to walk toward them, and as he passed, he reached into his waistband. The officers got out of their car, drew their weapons and ID'd themselves as police. Chavez removed a blue steel revolver from his waistband and was shot. A later LA Times profile of Chavez describes him as a reformed…	http://homicide.latimes.com/post/juan-diaz-chavez/	Fernando Flores, Alfredo Aguayo	Yes		I've already requested to receive updates.
FLPinellas	2014-08-23 14:53:06	2013-07-16	FL - Florida	Pinellas	St. Petersburg	St. Petersburg police	Carlos Crompton	39	Male	Black or African American	Unknown	Black		Killed	Armed	Handgun	After a woman was shot, police ID'd and searched for the shooting suspect, Crompton. They found his car near a relative's home. The officers identified themselves and confronted Crompton in the front yard near his car. Police said Crompton went to his car and came back with a black .38 special revolver, which he used to fire one round at officers. The officers shot him and he was taken to hospita…	http://www.baynews9.com/content/news/baynews9/news/article.html/content/news/articles/bn9/2013/7/16/suspect_injured_in_o.html	Brian Burton, Joseph Heer	Yes		I've already requested to receive updates.
TXBexar	2014-08-23 17:19:31	2013-07-16	TX - Texas	Bexar	San Antonio	San Antonio police	Daryll Blair	19	Male	Black or African American	Unknown	Black		Killed	Unarmed	Unarmed	Blair was fatally shot after he allegedly crashed a stolen police-issued Ford Explorer, got out of the SUV and began charging toward officer. Officer used a stun gun first, according to report, before resorting to lethal force.	http://www.expressnews.com/news/local/article/Family-frustrated-by-man-s-fatal-shooting-by-cop-4695933.php#/0	Sharonda Harris	Yes		I've already requested to receive updates.
CASolano	2014-08-24 15:42:50	2013-07-18	CA - California	Solano	Vacaville	Vacaville Police	Kendall Walker	24	Male	Black or African American	Unknown	Black		Killed	Armed	Hammer, knife	After a low-speed pursuit from the scene of a reported domestic conflict, Walker got out his car with a hammer in one hand and a knife in the other, according to police. Walker then moved toward the police “in a threatening way,” according to police, prompting police to shoot Walker several times. NOTE: Walker's ethnicity is not reported, but a newspaper photo of his father suggests he was Black …	http://www.dailyrepublic.com/news/crimecourts/parents-file-federal-suit-against-city-police-in-adult-sons-death/	Tomi Kingi, Daniel Valk	Yes		I've already requested to receive updates.
OHHamilton	2014-08-27 21:58:55	2013-07-25	OH - Ohio	Hamilton	Cincinnati	Cincinnati Police Department	Roger Ramundo	32	Male	Unknown	Hispanic or Latino origin	Hispanic	2	Killed	Armed	Firearm; not stated	Cincinnati PD receives 911 call from a mental health care provider about a person (Ramundo) with mental illness having a gun. 5 officers find Ramundo, after which Ramundo fired a shot from his gun after officers' attempts to restrain him. Officer Gabel fires two shots after Ramundo's initial shot to stop him.	http://wvxu.org/post/cincinnati-police-release-details-about-fatal-officer-involved-shooting	Bryan Gabel	Yes		I've already requested to receive updates.				2013-07-24	1	No, I have an incident/more incidents to log.
TXBell	2014-08-27 22:11:28	2013-07-25	TX - Texas	Bell	Temple	Temple Police Department	Alphonso Barrera Jimenez	53	Male	Unknown	Hispanic or Latino origin	Hispanic	1	Hit	Armed	Knife or cutting instrument	Officers caught Jimenez in what as supposed to be a vacant apartment armed with a knives. Jimenez threw his knife which hit an officer in the leg. Jimenez then pulled out his second knife and approaches officers ignoring their orders to drop his weapons. One of the officers fires a shot into Jimenez's upper body to disable him from approaching further. Jimenez is then taken to hospital as police …	http://www.kwtx.com/home/headlines/Officer-Involved-Shooting-Sends-One-To-Hospital-216710151.html		Yes	5	I've already requested to receive updates.				2013-07-23	1	No, I have an incident/more incidents to log.
NCDurham	2014-08-20 13:16:30	2013-07-27	NC - North Carolina	Durham	Durham	Durham PD	Jose Adan Cruz Ocampo	37	Male	Unknown	Hispanic or Latino origin	Hispanic	4	Killed	Armed	Knife or cutting instrument	The victim was waiting to talk to police on the steps of his apartment. Police approached and notice the victim had a knife in his back pocket. Police drew weapons and ordered the victim to drop the knife. The victim removed the knife and presented to police handle first. Police shot and killed the victim.	http://www.thedurhamnews.com/2014/01/21/3552252/autopsy-confirms-suspect-died.html	Officer R.S. Mbuthia
TXShackelford	2014-08-22 00:10:01	2013-07-28	TX - Texas	Shackelford	Albany	Shackelford County SO	Stacey Guy Garren	49	Male	White	Not of Hispanic or Latino origin	White	4	Killed	Armed	Handgun	According to the Shackelford County Sheriff's Office, an Albany police officer and Shackelford County officers responded to a disturbance call at 456 Chism Street at 8:30 p.m. Saturday. When they arrived, they made contact with Garren in the backyard of the residence. When officers tried to arrest him, Garren allegedly broke free from the officers, retrieved a .22 caliber handgun and pointed it a…	http://www.ktxs.com/news/officerinvolved-shooting-leaves-man-dead-in-albany/21215526		Yes	3
TXMontgomery	2014-08-20 12:39:18	2013-07-31	TX - Texas	Montgomery	Conroe	Conroe Police Department	Russel Rios	19	Male	Unknown	Hispanic or Latino origin	Hispanic		Killed	Unarmed	Unarmed	Officer responded to a shoplifter detained by Walmart LP. Suspect fled the scene into a nearby wooded area. Officer pursued. Officer caught suspect and a struggle ensued. Officer discharged is firearm while being strangled by suspect. Suspect pronounced DOA at scene.	http://www.yourhoustonnews.com/courier/news/officer-involved-shooting-in-conroe/article_eb65c878-45c8-5561-a7b0-949f04b22f22.html?mode=story
FLLee	2014-08-24 23:18:16	2013-08-01	FL - Florida	Lee	North Fort Myers	Lee County Sheriff's Office	Matthew Blaine Wilson	23	Male	White	Unknown	White		Unknown	Armed	Vehicle	The gray Dodge Ram pickup truck was stolen. The deputy continued to follow the Dodge when suddenly the suspect began driving erratically and forcing other vehicles off the road. Both vehicles came to rest in the grass on the east side of the road. The deputy exited his patrol car and advanced on foot toward the suspect who began revving the engine in an attempt to avoid apprehension, placing the …	http://www.nbc-2.com/story/22979030/deputy-involved-shooting-on-i-75nb#.U_qpx_m1Yaw		Yes	4	I've already requested to receive updates.
FLPalmBeach	2014-08-24 23:08:25	2013-08-01	FL - Florida	PalmBeach	Boynton Beach	West Palm Beach Police	Moses McCray	31	Male	Black or African American	Unknown	Black		Unknown	Armed	Handgun	Victim was convicted felon waving a pistol at police, did not fire shots. Police followed victim, ordered him out of car. Victim attempts to run over one of four officers, two officers fire at vehicle hitting victim.	http://www.palmbeachpost.com/news/news/crime-law/investigation-underway-in-officer-involved-shootin/nY9qJ/	Ofc Christian Tomas, and Sgt. Joseph Herb	Yes	5	I've already requested to receive updates.
WIDane	2014-08-22 16:16:30	2013-08-17	WI - Wisconsin	Dane	Madison	Madison Police Department	Charles G. Carll	59	Male	White	Not of Hispanic or Latino origin	White	6	Killed	Armed	Knife or cutting instrument	Officers had been called to Carll's home after reports of a domestic dispute. When they arrived, Carll's wife told officers he was depressed and had cut himself in the stomach with a knife. Officers located Carll and ordered him to drop his knife, but he started toward officers who first shot a Taser which did not work. According to the release, officers were forced to legally shoot Carll as a re…	http://www.wkow.com/story/23163915/2013/08/17/madison-police-on-the-scene-of-an-officer-involved-shooting	Officers Adrian Alan, Alex Bol, and Ed Marshall	Yes	2	Add me!	Marielle Prince	marielle.prince@gmail.com
WASpokane	2014-08-20 18:06:54	2013-08-22	WA - Washington	Spokane	Spokane	Spokane Police Department	Daniel Cecil Jones	40	Male	White	Not of Hispanic or Latino origin	White	7	Killed	Unarmed	Unarmed		http://www.krem.com/news/regional/spokane-county/SPD-identifies-officers-involved-in-a-deadly--221388791.html	SPD leaders said Lt. Kevin King, Officers Robert Collins, Corey Lyons, and Scott Lesser
IDKootenai	2014-08-21 03:38:04	2013-08-25	ID - Idaho	Kootenai	Coeur d'Alene	Kootenai County Sheriff's Office	Eric Byron Johnston	35	Male	White	Not of Hispanic or Latino origin	White	8	Killed	Armed	Knife or cutting instrument	Johnston flees car accident to friends apartment. Pursued there and confronted by Officer Spencer Mortensen. Resists, brandishes 2 knives and approaches officer. Told to drop knives, does not. Shot 8 times and killed.	http://www.spokesman.com/stories/2014/jan/15/police-release-video-officer-involved-shooting-coe/	Officer Spencer Mortensen	Yes
CAContraCosta	2014-08-20 18:51:05	2013-08-28	CA - California	ContraCosta	Antioch	Antioch Police Department	Korey Marcel Germaine	24	Male	Black or African American	Not of Hispanic or Latino origin	Black		Killed	Armed	Handgun	"Police shot and killed a man in Antioch on Tuesday after he allegedly led them on a chase and pointed a handgun at officers, a police captain said Wednesday morning."	http://sanfrancisco.cbslocal.com/2013/08/28/police-involved-shooting-antioch/
MDBaltimore	2014-08-20 13:52:28	2013-08-28	MD - Maryland	Baltimore	Baltimore	Baltimore County Police	Tevon Smith	25	Male	Black or African American	Unknown	Black		Killed	Armed	Handgun	tactical team looking to apprehend suspect in earlier shooting entered residence of suspect, suspect's nephew fired at officers, killing Officer Jason Schneider, Schneider and a fellow officer returned fire, killing suspect's nephew, Tevon Smith.	http://articles.baltimoresun.com/2014-01-29/news/bs-md-co-rasheed-stanford-20140129_1_rasheed-stanford-officer-jason-schneider-tevon-smith	multiple
MAHampden	2014-08-20 12:58:19	2013-08-29	MA - Massachusetts	Hampden	Sprinfield	Springfield Police Department	Heriberto Eddie Hernandez	49	Male	Unknown	Hispanic or Latino origin	Hispanic	1	Hit	Armed	Knife or cutting instrument	officer called in response to domestic dispute, suspect drew a knife and released a pit bull on officer, officer shot suspect in leg.	http://www.masslive.com/news/index.ssf/2013/08/heriberto_eddie_hernandez_shot.html
ORWasco	2014-08-20 13:45:53	2013-08-29	OR - Oregon	Wasco	The Dalles	Oregon State Patrol	John Van Allen III	34	Male	Black or African American	Unknown	Black		Killed	Armed	Handgun	suspect pulled over for speeding, exited car and exchanged fire with officer; "a number" of rounds were fired by each but exactly number unspecified. Both officer and suspect were wounded, suspect drove away from scene but was found dead of wound after car drove off the road.	http://newstalk870.am/more-details-released-about-officer-involved-fatal-i-84-shooting/	Matthew Zistel
VAFairfax	2014-08-20 13:14:24	2013-08-29	VA - Virginia	Fairfax	Springfield	Fairfax County Police	John Geer	46	Male	White	Not of Hispanic or Latino origin	White	1	Killed	Unarmed	Unarmed	police responding to domestic dispute, report indicated suspect was armed. Suspect answered door, was unarmed (weapon in house but not on person) was shot by officer after talking with police for several minutes. Suspect retreated into home, closing door - police waited approx. one hour before entering home and discovering suspect deceased.	http://www.washingtonpost.com/blogs/local/wp/2014/04/02/the-death-of-john-geer-now-seven-months-of-silence-on-fairfax-police-shooting/
VAFairfax	2014-08-20 16:58:06	2013-08-29	VA - Virginia	Fairfax	Springfield	Fairfax County Police Department	John B. Geer	48	Male	White	Not of Hispanic or Latino origin	White	1	Killed	Unarmed	N/A		http://www.washingtonpost.com/blogs/local/wp/2014/07/08/ten-months-of-silence-in-the-fairfax-police-shooting-death-of-john-geer/	Unknown
ORDeschutes	2014-08-25 11:57:02	2013-08-30	OR - Oregon	Deschutes	Sisters	Oregon State Police	William Hall	34	Male	White	Not of Hispanic or Latino origin	White	10	Hit	Armed	Handgun	who was covered in white supremacist-themed tattoos, was under the influence of a stimulant, though he passed the field sobriety test, http://www.bendbulletin.com/localstate/1664487-151/police-release-video-transcripts-of-august-shooting#	http://www.bendbulletin.com/localstate/1664487-151/police-release-video-transcripts-of-august-shooting#		Yes	4	No thanks.
COAdams	2014-08-25 15:51:16	2013-08-31	CO - Colorado	Adams	Thornton	Thornton Police Department	Jaime Ceballos	32	Male	Unknown	Hispanic or Latino origin	Hispanic		Killed	Armed	knife and baseball bat	Man had been drinking and not taking anti-depressant medication, was wielding a baseball bat and a knife and would not drop weapons. Police initially used a stun gun but resorted to deadly force after that was ineffectual.	http://denver.cbslocal.com/2013/08/31/neighbor-calls-man-killed-by-thornton-police-a-nice-hardworking-man/		Yes	2	Add me!	Jennifer Dulock	jennifer.dulock@gmail.com		2013-08-31	1
NCMecklenburg	2014-08-20 22:18:03	2013-09-01	NC - North Carolina	Mecklenburg	Charlotte-Mecklenburg	Charlotte-Mecklenburg Police Department	Jonathan A. Ferrell	24	Male	Black or African American	Not of Hispanic or Latino origin	Black	12	Killed	Unarmed	Unarmed	Victim was in a bad car accident. Having escaped the vehicle through the back window, he went to a house about a half mile away and knocked on the door aggressively, Thinking she was being robbed a woman in the home called police. When they arrived they say Ferrell charged after them, after being told to stop and an unsucceseful taser attempt, Officer Kerrick fired "several" rounds hitting Ferrel…	http://www.charlotteobserver.com/2013/09/14/4313045/cmpd-chief-to-hold-press-conference.html#.U_VR_PlGt2M	Officer Randall Kerrick	Yes
COAdams	2014-11-15 01:38:41	2013-09-02	CO - Colorado	Adams	North Glenn	North Glenn Police	Alejandro Pinedo	38	Male	Unknown	Hispanic or Latino origin	Hispanic		Hit	Armed	Knife or cutting instrument	Police responded to an attempted home robbery in progress, police were called by residents of the home. Lewis claimed he was "not going back to jail" and so, armed with a knife he advanced on the officer. Officer Adams fired on the suspect. Suspect was released from the hospital two months later and was charged with multiple felonies.	http://www.northglenn.org/WEB-PDF/2013-4314_Officer_Involved_Shooting.pdf	Adam Lewis	Yes	4	I've already requested to receive updates.				2013-09-02	1	No, I have an incident/more incidents to log.
FLPinellas	2014-08-20 14:48:57	2013-09-02	FL - Florida	Pinellas	St Petersburg	St Petersburg police	Ronald Sexton	23	Male	White	Not of Hispanic or Latino origin	White	17	Killed	Armed	Handgun	Officers were called to the home of Sexton about an argument with his neighbor. When they arrived they say he answered the door holding a gun. He was fatally shot on his porch. 3 officers involved: Nicolo Mangiaracina shot 9 times, Justin Morales shot 7 times, Michael Romano shot 1 time. in-depth report here: http://www.stpete.org/police/releases/oct13/10-11-13-sao-shooting-letter.pdf	http://www.abcactionnews.com/news/region-south-pinellas/st-petersburg/st-petersburg-police-officers-shoot-and-kill-young-man-after-they-say-he-pointed-a-gun-at-them	Nicolo Mangiaracina, Justin Morales, Michael Romano
MDBaltimore	2014-08-20 15:43:56	2013-09-04	MD - Maryland	Baltimore	Baltimore	Baltimore Police Department	Donte Bennett	25	Male	Black or African American	Unknown	Black		Killed	Unarmed	Cellphone thought to be gun	Following a foot chase, police shot and killed Bennett when, police claim, he pulled a handgun. Witnesses dispute that Bennett had a gun, saying he had a phone in his hand when police shot him.	http://articles.baltimoresun.com/2013-09-05/news/bs-md-ci-douglass-homes-shooting-folo-20130905_1_police-involved-shooting-douglass-homes-police-officers	Joseph Wiczulis, Kyle Gaskin
ALMobile	2014-08-20 16:25:06	2013-09-05	AL - Alabama	Mobile	Mobile	Mobile Police Department	Kenneth Lamar Bedgood	36	Male	Black or African American	Not of Hispanic or Latino origin	Black		Killed	Armed	Firearm; not stated	Following stolen vehicle pursuit, Bedgood abandoned vehicle and fled on foot. Police say he shot at them, and they exchanged gunfire killing him	http://blog.al.com/live/2013/11/mobile_police_september_homici.html
FLHillsborough	2014-08-20 18:29:48	2013-09-05	FL - Florida	Hillsborough	Tamp	Tampa Police Department, Hillsborough County Sheriff, U.S. Marshalls	Charlie Christopher Bates	24	Male	Black or African American	Not of Hispanic or Latino origin	Black		Killed	Armed	Firearm; not stated	After crime spree that involved multiple home invasions and sexual assaults, Bates leads police on car chase, ending in him crashing car and getting into shootout resulting in his death Photos/videos and journalist's first hand account: http://luissantanaphoto.com/pursuit-and-shootout-of-charlie-christopher-bates-photos-video-audio/	http://www.usatoday.com/story/news/nation/2013/09/06/tampa-police-shootout/2776923/	Multiple
MAEssex	2014-08-20 17:02:33	2013-09-05	MA - Massachusetts	Essex	Lynn	Lynn Police Department	Denis Reynoso	30	Male	White	Hispanic or Latino origin	Hispanic	1	Killed	Armed	Handgun	Police entered home after call of erratic behavior. Say Reynoso got into altercation with 2 of the officers, and took one of their guns, firing 2 shots. 3rd officer, Hilton, shot suspect once in the side. Later died at hospital.	http://baystateexaminer.com/records-raise-new-questions-fatal-police-shooting-denis-reynoso/	Joshua Hilton
ARJefferson	2014-08-20 16:58:05	2013-09-07	AR - Arkansas	Jefferson	Pine Bluff	Pine Bluff Police Department	Monroe Isadore	107	Male	Black or African American	Not of Hispanic or Latino origin	Black		Killed	Armed	Firearm; not stated	SWAT team shot the man who was supposedly wielding a gun at people inside the house. "A public information officer told reporters they pumped gas into the room hoping Isadore would surrender, but he fired shots at them instead." "Soon after, police kicked down the door to the bedroom Isadore was in. KTHV adds Isadore fired even more shots at officers when they broke into the room. Police fired ba…	http://www.palmbeachpost.com/news/news/national/swat-team-shoots-kills-107-year-old-man/nZqdS/
ILCook	2014-08-21 17:39:33	2013-09-07	IL - Illinois	Cook	Chicago	Chicago Police Department	Marlon Horton	28	Male	Black or African American	Unknown	Black	1	Killed	Unarmed	Unarmed	Unnecessary killing. Killing caught on video tape. Feel free to contact our office should you wish to inquire more about the specifics of this case. Law Office of Jeffrey Granich, 312-939-9009	http://chicago.cbslocal.com/2013/09/24/lawsuit-filed-over-fatal-police-involved-shooting-at-cha-building/	Kenneth Walker, Star No. 9191	Yes	1
TNMarion	2014-08-22 16:38:19	2013-09-07	TN - Tennessee	Marion	Jasper	Marion County Sheriff's Department	John E. Shanks	29	Male	White	Not of Hispanic or Latino origin	White		Killed	Armed	Firearm; not stated	Some sources called it "suicide by cop"; Shanks' family called it the end result of a meth addiction. Description below from http://www.wdef.com/mostpopular/story/Marion-County-shooting-may-have-been-suicide-by/9Zf5BdC7L0quP5-60lpSbA.cspx A deputy was called to a home to investigate a suspicious man who was seen on some ones back porch. Investigators say when the deputy arrived, Shanks tried to s…	http://www.wdef.com/mostpopular/story/Marion-County-shooting-may-have-been-suicide-by/9Zf5BdC7L0quP5-60lpSbA.cspx		Yes	4	I've already requested to receive updates.
MAEssex	2014-08-22 16:14:13	2013-09-09	MA - Massachusetts	Essex	Stoneham	Saugus Police	Jonathan Colleran	31	Male	White	Unknown	White	4	Hit	Armed	Vehicle	When police attempted to pull Colleran over for driving erratically, he turned the car and drove directly at the police car. An officer then reportedly discharged his service weapon four times, hitting Colleran in his chest, back, and left arm. An unidentified female passenger in his car, listed by police as 33-years-old, was also wounded by gunfire in her left arm.	http://homenewshere.com/stoneham_independent/news/article_3b864406-1ef0-11e3-ab14-001a4bcf887a.html		Yes	2	I've already requested to receive updates.
NCDurham	2014-08-20 22:18:01	2013-09-17	NC - North Carolina	Durham	Durham	Durham Police Department	Derek Deandre Walker	26	Male	Black or African American	Not of Hispanic or Latino origin	Black	1	Killed	Armed	Firearm; not stated	A 26-year-old man who was shot to death by police in downtown Durham Tuesday afternoon posted on his Facebook page before the fatal standoff that he was upset about a custody dispute over his son and that he hoped to die soon. Investigators say Derek Deandre Walker walked into downtown Durham's CCB Plaza on Corcoran Street shortly after 4 p.m., distraught, waving a gun and shouting. WRAL News vid…	http://www.wral.com/man-killed-in-durham-police-standoff-snapped-close-friend-says/12899940/	Cpl. R. C. Swartz	Yes
CAMonterey	2014-08-20 14:48:14	2013-09-19	CA - California	Monterey	Salinas	Salinas Police Department	Charlene Hale	44	Female	White	Unknown	White	2	Hit	Armed	Knife or cutting instrument	Shooting victim had allegedly robbed customers at a laundromat.	http://www.ksbw.com/news/central-california/salinas/king-city-man-shot-in-head-by-police-identified/22083932#!bGTD27
INMarion	2014-08-20 18:07:29	2013-09-20	IN - Indiana	Marion	Indianapolis	IMPD	Rodd Bradway	41	Male	White	Not of Hispanic or Latino origin	White		Killed	Armed	Handgun		http://www.indy.gov/eGov/City/DPS/IMPD/About/Memoriam/Pages/Rod-Bradway.aspx
CASanDiego	2014-08-20 22:33:22	2013-09-21	CA - California	SanDiego	Pacific Beach	San Diego Police Department	Paul Aaron Brinkman	38	Male	White	Unknown	White	1	Hit	Armed	Scissors	Brinkman had stabbed one man in the arm, and threatened another man hours later with scissors. When police responded, he ignored commands to drop the scissors and continued walking towards the Officer. When Brinkman got within 15 feet the officer shot him once in the stomach, injuring but not killing him. Brinkman was sentenced to 5 years for assault and threatening a police officer.	http://fox5sandiego.com/news/stories/pacific-beach-shooting/#axzz3AzQELOuq	Not released	Yes
NCMecklenburg	2014-08-20 16:37:37	2013-09-24	NC - North Carolina	Mecklenburg	Charlotte	Charlotte-Mecklenburg Police Department	Jonathan Ferrell	24	Male	Black or African American	Not of Hispanic or Latino origin	Black		Killed	Armed	Personal weapon (hands, fists, feet, etc.)	Former Florida A&M football player. He was in a car accident and walked to a home where the homeowner called 911. When the cops came they found Ferrell on the side of the road. They claim he charged them and a Taser was fired at him, then another cop shot him. That cop was charged with involuntary manslaughter.	http://www.palmbeachpost.com/news/news/national/officer-charged-voluntary-manslaughter-after-shoot/nZx8w/	Randall Kerrick
MDHarford	2014-08-20 17:39:24	2013-09-28	MD - Maryland	Harford	Havre de Grace	Harford County Sheriff	Austin Francis Jones	34	Male	White	Not of Hispanic or Latino origin	White		Killed	Armed	Handgun	Police called to a barricade situation about a person possibly armed and holding someone against their will. During negotiations Jones pointed something at officers and he was shot. Dead at scene	http://www.daggerpress.com/2013/09/29/34-yr-old-havre-de-grace-man-had-released-hostage-made-overt-gesture-with-black-object-prior-to-being-shot-by-srt/
NCBuncombe	2014-08-20 20:12:30	2013-09-29	NC - North Carolina	Buncombe	Asheville	Asheville Police	Alexander Jamar Marion	19	Male	Black or African American	Unknown	Black		Killed	Unarmed	Previously had handgun, but not when he was shot	"A former Asheville high school football star was shot and killed after police say he was involved in a break-in and fired a gun as officers chased him. The Asheville Citizen-Times reports (http://avlne.ws/1bm7xhA ) former Reynolds High School football star A.J. Marion was shot Sunday morning after being struck by a single bullet. Police said Marion died at Mission Hospital. Sgt. Dave Romick said…	http://www.highschoolot.com/former-asheville-high-school-football-star-shot-killed/12948740/		Yes
UTTooele	2014-08-20 17:32:49	2013-09-29	UT - Utah	Tooele	Grantsville	Grantsville Police Department	Travis Davis	37	Male	White	Not of Hispanic or Latino origin	White	1	Killed	Armed	Handgun	Police called to check on a disturbed man, barricaded himself in him and after a negotiation came out of home with a gun, officer shot him. Suspected suicide by cop	http://fox13now.com/2013/09/29/medical-helicopter-responding-after-officer-involved-shooting/
NHHillsborough	2014-08-22 22:45:29	2013-09-30	NH - New Hampshire	Hillsborough	Manchester	New Hampshire State Police	Wendy Lawrence	45	Female	White	Not of Hispanic or Latino origin	White	11	Killed	Unarmed	Unknown		http://doj.nh.gov/media-center/press-releases/2013/documents/20131015-state-police-involved-shooting-report.pdf	Trooper Chad Lavoie	Yes	2	I've already requested to receive updates.
TXBrazoria	2014-08-20 20:03:02	2013-10-01	TX - Texas	Brazoria	Freeport	Freeport Police			Male	White	Hispanic or Latino origin	Hispanic		Killed	Armed	Firearm; not stated	"FREEPORT, TX -- Freeport police say a suspect was shot and killed during a gunfight with officers Tuesday evening. Police received a call around 6:55pm about shots fired in the 700 block of West 6th Street. Officers responded to the scene, and as they were talking to witnesses, one of them pointed out the suspect's vehicle as it drove by. Officers followed the vehicle to the intersection of Ceda…	http://abc13.com/archive/9270067/
GAWare	2014-08-20 15:26:48	2013-10-06	GA - Georgia	Ware	Waycross	Waycross police	Jack Lamar Roberson	43	Male	Black or African American	Unknown	Black	6	Killed	Armed	Grilling utensils	Police are investigating two very different accounts of an officer-involved shooting that ended with the death of a man suffering from diabetes. Police say they were responding to a call of a combative, suicidal man, and arrived at the home to find Jack Lamar Roberson armed with two weapons. They say he charged at them before they opened fire, according to the Atlanta Journal-Constitution. Robers…	http://www.crimelibrary.com/blog/2013/10/09/more-details-emerge-in-waycross-case-as-911-call-realeased/index.html
IAScott	2014-08-20 12:34:21	2013-10-10	IA - Iowa	Scott	Davenport	Davenport Police Department	Ryan Adam Franklin	21	Male	White	Not of Hispanic or Latino origin	White	4	Hit	Armed	Other Gun	Victim was prowling around neighborhood. Cops questioned him. Gun found during patdown and victim broke free and cops shot at him while he was running away. The gun was later found to be a BB gun	http://wqad.com/2013/10/10/witness-describes-davenport-police-involved-shooting/
ALBarbour	2014-08-23 16:20:52	2013-10-15	AL - Alabama	Barbour	Eufaula	Eufaula Police Department	Cameron Massey	26	Male	Black or African American	Not of Hispanic or Latino origin	Black	4	Killed	Unarmed	Unarmed	Massey was a passenger in a car that was stopped by police at 431 South Wrecker Service in Eufaula when he was shot multiple times by police. Massey caused the vehicle to accelerate, dragging one of the officers, according to a statement released Wednesday from Mayor Jack Tibbs. The traffic stop about 45 miles south of Columbus developed into a drug-trafficking investigation.	http://www.wrbl.com/story/25134960/barbour-co-special-grand-jury-expected-to-rule-wednesday-on-massey-case		Yes	2	No thanks.
CASonoma	2014-08-20 12:32:11	2013-10-22	CA - California	Sonoma	Santa Rosa	Santa Rosa Police Dept.	Andy Lopez	13	Male	Unknown	Hispanic or Latino origin	Hispanic	7	Killed	Unarmed	toy gun		http://sonomacounty.ca.gov/Press-Releases-/No-Criminal-Charges-in-Officer-Involved-Shooting/	Erik Gelhaus
FLPalmBeach	2014-08-20 16:15:54	2013-10-26	FL - Florida	PalmBeach	West Palm Beach	West Palm Beach Police Department	Demitri Polen	24	Male	Black or African American	Not of Hispanic or Latino origin	Black	12	Killed	Armed	Rifle	"Christopher Nebbeling fired 12 shots at Demitri Polen, 24, after seeing the rifle pointed at him" Nebbeling, a 5 year officer, went on administrative leave after the shooting and killing. The victim, Demitri Polen, pointed an AK-47 assault rifle at Nebbeling. Polen was not in a gang, like police believed, but he had been arrested multiple times previously for loitering, prowling, resisting an of…	http://www.palmbeachpost.com/news/news/crime-law/west-palm-beach-police-to-release-details-regardin/nbZ2Z/	Christopher Nebbeling
FLDuval	2014-08-20 18:53:52	2013-10-27	FL - Florida	Duval	Jacksonville	Jacksonville Sheriff's Office	Jarmal Anthony Cosby	28	Male	Black or African American	Unknown	Black	3	Killed	Armed	Handgun	Man fitting armed-robbery suspect seen fleeing; dropped the gun while climbing a fence. Shot 3 times. No gun found near Cosby.	http://jacksonville.com/breaking-news/2013-10-27/story/police-involved-jacksonville-shooting-sunday-night-suspect-dead	M.W. Crawford
TNTipton	2014-08-20 20:02:50	2013-10-27	TN - Tennessee	Tipton	DRUMMONDS	Tipton County Sheriff's Office	Jake Maese-Murphy	26	Male	White	Unknown	White		Killed	Armed	threatened he had a gun	Went to father's house to do urine drug test; confrontation ensued. Jake had a knife, and threatened that he had a gun. All three officers fired.	http://www.wmcactionnews5.com/story/23807035/son-shot-killed-by-deputies-investigating-his-father	Dep. Jason Allen, Dep. Demario Avery, Inv. Brandon Williams
AZMaricopa	2014-08-27 18:57:56	2013-10-28	AZ - Arizona	Maricopa	Phoenix	Phoenix Police	Jonathon Corrales	23	Male	White	Hispanic or Latino origin	Hispanic		Unknown	Armed	Shotgun	Officers pursued a vehicle involved in a jewelry store robbery. Passenger in the vehicle fired a shotgun at the pursuing police, and police responded with gunfire. Suspects evaded police and were arrested at a later time. No injuries to the suspects. News report identifying suspects: http://www.azcentral.com/community/phoenix/articles/2011/11/02/20111102phoenix-police-make-arrest-jewelry-store-ro…	http://www.abc15.com/news/region-phoenix-metro/central-phoenix/officer-involved-shooting-shuts-down-phoenix-freeway-ramp		Yes	3	No thanks.				2013-10-28	1	No, I have an incident/more incidents to log.
CAAlameda	2014-08-27 22:59:30	2013-10-28	CA - California	Alameda	Oakland	Oakland Police	Scott Olsen	26	Male	White	Not of Hispanic or Latino origin	White	1	Hit	Unarmed	Unarmed	Olsen, a ex-Marine and Iraq veteran, was present at a protest march, and was struck by a tear gas canister. NOT TECHNICALLY A SHOOTING Proper news report: http://rt.com/usa/occupy-scott-olsen-settlement-433/	http://www.democracynow.org/2011/10/28/headlines		Yes	1	No thanks.				2011-10-25	2	No, I have an incident/more incidents to log.
GABulloch	2014-08-20 19:33:22	2013-10-28	GA - Georgia	Bulloch	Statesboro	Statesboro Police	George Pryor	61	Male	Black or African American	Unknown	Black		Killed	Armed	unknown	Officers attended with code enforcement officer about a junk trunk on Pryor's property. They wanted it removed. Argument ensued. Officers received minor injuries only (scrapes) Pryor dead.	http://www.wsav.com/story/23806056/one-dead-in-officer-involved-shooting-in-statesboro	na
NCGuilford	2014-08-27 18:49:03	2013-10-28	NC - North Carolina	Guilford	Greensboro	Greensboro Police	Dimarkchrisy Majors	22	Male	Black or African American	Not of Hispanic or Latino origin	Black		Killed	Armed	Unknown	Officers pursued two suspects after a reported bank robbery. Suspects fired on police, injuring one officer. Suspect Majors died of injuries several hours after. The other suspect, Christopher O'Neal-Patterson (23) was wounded, but survived. Actual news report with date: http://archive.digtriad.com/news/local/story.aspx?storyid=119019	http://www.wfmynews2.com/video/48920162001/0/Breaking-News-Police-Involved-Shooting-Injures-Three--C		Yes	5	No thanks.				2009-02-09	1	No, I have an incident/more incidents to log.
TXDallas	2014-08-20 18:38:09	2013-10-28	TX - Texas	Dallas	Duncanville	Duncanville Police Dept	Clinton Peterson	28	Male	White	Unknown	White	2	Killed	Unarmed	unarmed	Argument at friend's home, he had left. Police confronted him on the street, tased him, then shot him twice. He was unarmed	http://www.dallasobserver.com/2013-12-05/news/killed-for-running-away/full/	na
CALosAngeles	2014-08-20 22:43:42	2013-11-04	CA - California	LosAngeles	Los Angeles				Male	Unknown	Hispanic or Latino origin	Hispanic		Hit	Armed	Firearm; not stated	4th and Soto	http://www.boyleheightsbeat.com/man-shot-by-police-after-leading-foot-chase-in-boyle-heights-3117		Yes
IAStory	2014-08-20 12:59:21	2013-11-04	IA - Iowa	Story	Ames	Ames PD	Tyler Comstock	19	Male	White	Unknown	White		Killed	Unarmed	Unarmed		http://www.kcci.com/news/central-iowa/weve-got-shots-fired-hes-trying-ramming-us-again/22815706#!bGP7hx	Adam McPherson
NMBernalillo	2014-08-20 18:09:33	2013-11-15	NM - New Mexico	Bernalillo	Albuquerque	Albuquerque Police Department	Robert Garcia, Sr.	64	Male	Unknown	Hispanic or Latino origin	Hispanic		Hit	Armed	Firearm; not stated	Office pulled Garcia over for some sort of traffic stop. Garcia apparently got out of his car and confronted officer with a gun before he was critically injured by officer's bullet	http://www.abqjournal.com/302018/news/few-details-released-in-apd-shooting.html
CASonoma	2014-08-20 22:12:02	2013-11-19	CA - California	Sonoma	Guerneville	Sonoma County Sheriff	Wayne Allen Courtright Jr	58	Male	White	Not of Hispanic or Latino origin	White		Killed	Armed	Rifle		http://www.pressdemocrat.com/news/2225056-181/armed-guerneville-man-shot-killed	Deputy Henri Boustany, 43, and Deputy Frank Chavez, 45,	Yes
NVClark	2014-08-27 17:54:45	2013-11-21	NV - Nevada	Clark	Las Vegas	Las Vegas Metro Police	Bernard Pate	37	Male	Black or African American	Not of Hispanic or Latino origin	Black		Killed	Armed	Handgun	Officers attempted to stop suspect on suspicion. Suspect fled, tripped and fell, and in officer's report pointed a handgun at the pursuing officer, then got up and ran while continuing to point the weapon at the officer, who fired, felling suspect. In officer's account suspect then raised the handgun again, and officer again fired. Suspect was pronounced dead at the scene. A police report of the …	http://www.lasvegassun.com/news/2011/nov/23/man-shot-metro-police-monday-identified/	Clarkson	Yes	3	No thanks.				2013-11-21	4	No, I have an incident/more incidents to log.
AZYavapai	2014-08-20 12:14:42	2013-11-23	AZ - Arizona	Yavapai	Prescott	Prescott Police Department	Larry Clay	44	Male	White	Not of Hispanic or Latino origin	White	1	Killed	Armed	Knife or cutting instrument	"When the first officer arrived, he was confronted by a 44-year-old male holding a knife in each hand," the news release stated. "The officer gave him verbal commands which he ignored and then charged the officer. The officer then shot the suspect."	http://www.dcourier.com/main.asp?SectionID=1&subsectionID=1086&articleID=125565
MOJackson	2014-08-20 14:28:55	2013-12-01	MO - Missouri	Jackson	Kansas City	Kansas City Police Department	Anthony Bruno	26	Male	White	Not of Hispanic or Latino origin	White	2	Killed	Unarmed	Personal weapon (hands, fists, feet, etc.)	Bruno was lying on the ground telling the officer to "be nice" when Hubbard dropped his knee on Bruno's head. Bruno then got the best of Hubbard, striking his face. Hubbard then shot Bruno twice in the chest. Hubbard broke several protocols and lied about it in the ensuing investigations.	http://m.pitch.com/kansascity/anthony-bruno-donald-hubbard-kansas-city-police-department/Content?oid=4366836&showFullText=true	Donald Hubbard
WAPierce	2014-08-21 09:17:53	2013-12-03	WA - Washington	Pierce	Spanaway	Pierce County METRO SWAT Team	Chase Houston	28	Male	White	Not of Hispanic or Latino origin	White		Killed	Armed	Handgun	On Dec. 3, 2013, at 2:00 p.m., Pierce County Sheriff’s deputies attempted to perform a welfare check on Houston at a garage-style storage unit near 216th Street and State Route 7 in Spanaway. Houston’s family told the deputies that Houston was living in the storage unit, was making irrational comments over the phone and on social networks, and was high on methamphetamine and armed. Deputies calle…	http://www.komonews.com/news/local/Pierce-County-deputy-shot-during-Spanaway-standoff-234330941.html?tab=video&c=y	Deputy Scott Brown and Deputy Erik Clarkson	Yes
IAPolk	2014-08-23 17:51:13	2013-12-04	IA - Iowa	Polk	Des Moines	Des Moines PD	Steven Jon Vogel	38	Male	White	Not of Hispanic or Latino origin	White		Killed	Armed	Rifle and handgun	Victim fired around 100 yards at random, shooting cars and houses in his neighborhood before being killed by police.	http://blogs.desmoinesregister.com/dmr/index.php/2013/12/05/gunman-dies-after-shootout-with-police/article	Lieutenant David Seybert and Officer Zach McCarthy	Yes	5	Add me!	Scott	slycotton82@yahoo.com
TXMedina	2014-08-20 15:35:05	2013-12-05	TX - Texas	Medina	San Antonio	Bexar County Sheriff	Mathew Jackson	29	Male	White	Unknown	White	8	Killed	Unarmed	Unarmed	Jackson bumped mirrors with Thomas's car. They both pulled over. There was an altercation. Jackson reached for a pen in his pocket and Thomas, who was off duty at the time, shot him 8 times and killed him.	http://www.expressnews.com/news/local/article/Car-bump-led-to-fatal-officer-involved-shooting-5039904.php	Anthony Thomas
TXBexar	2014-08-20 12:36:06	2013-12-06	TX - Texas	Bexar	San Antonio	University of Incarnate Word	Robert Cameron Redus	23	Male	White	Unknown	White	6	Killed	Unarmed	Unarmed	Robert Cameron Redus, who went by his middle name, was a 23-year-old honors student out celebrating the end of finals and the semester with friends the night of the incident. An autopsy report would later show that he was drunk and had traces of marijuana in his system. He was driving home to his off-campus apartment from a bar when Carter said he noticed Redus weaving between lanes and decided t…	http://www.therivardreport.com/uiw-semester-starts-with-protest-cameron-redus-shooting/	Christopher Carter
MDPrinceGeorge's	2014-08-22 11:20:37	2013-12-07	MD - Maryland	PrinceGeorge's	District Heights	Prince George's County Police Department	Bobby Frederick Dews	25	Male	Black or African American	Unknown	Black		Hit	Armed	Firearm; not stated	Dews and two other accomplices had stolen a car and were on the run from a robbery. Officers followed the car and engaged in a brief gun fight before Dews was injured and officers were able to subdue him	http://pgpolice.blogspot.com/2013/12/pgpd-investigates-officer-involved.html	Corporal Kenneth Meushaw	Yes	3	No thanks.
WAChelan	2014-08-20 15:06:07	2013-12-12	WA - Washington	Chelan	Wenatchee	Wenatchee Police Department	Robert Jeffrey Harris	43	Male	White	Not of Hispanic or Latino origin	White	5	Killed	Unarmed	Unarmed	Officer Reiber attempted to stop Harris in a Taco Bell drive-thru lane after Harris sold meth to an undercover informant. When Reiber approached Harris' Ford Bronco, Harris attempted to drive away, and Reiber was "dragged" by the vehicle. He opened fire, killing Harris and bringing the vehicle to a stop.	http://www.wenatcheeworld.com/news/2014/jun/23/officers-fatal-shooting-at-taco-bell-justified/	Scott Reiber
OHCuyahoga	2014-08-21 09:42:20	2013-12-20	OH - Ohio	Cuyahoga	Cleveland	Cleveland Police Department	Xavier Hempstead	29	Male	Black or African American	Not of Hispanic or Latino origin	Black	2	Hit	Unarmed	Unarmed	Police say they approached victim's SUV because he was a burglary suspect. They say when they walked up he flashed the muzzle of a gun at them so they opened fire, with two rounds hitting victim in neck and shoulder. Victim fled and surrendered a mile away. Police later admitted finding no weapons in his SUV, but were sure to tell media about his lengthy criminal record. Community reacted angrily…	http://www.cleveland.com/metro/index.ssf/2013/12/cleveland_police_no_weapons_fo.html	First District Detective Robert Miles	Yes
IABlackHawk	2014-08-21 00:27:45	2013-12-25	IA - Iowa	BlackHawk	Cedar Falls	Cedar Falls Police Department	Zach Church	27	Male	White	Not of Hispanic or Latino origin	White	2	Hit	Unarmed	Handgun	The shooting happened near Second Street and Hudson Road in Cedar Falls around 3 a.m. Wednesday. Police Chief Jeff Olson says 27-year-old Zachary Church was sleeping in a parked car near the intersection, and the car was still running. Police say an altercation happened after the investigating officer got Church out of the car, and discovered marijuana. According to Chief Olson, Officer Bob Ander…	http://www.wrex.com/story/24300453/2013/12/25/officer-involved-shooting-in-cedar-falls-sends-two-to-hospital	Bob Anderson	Yes
CALosAngeles	2014-08-22 19:36:37	2013-12-26	CA - California	LosAngeles	Torrance	Torrance Police Department	Asa James Dolak	19	Male	White	Unknown	White		Killed	Armed	Knife or cutting instrument	Dolak had set fire to the apartment shared by his ex-girlfriend and their 2-year-old son earlier that day. Police said that about 2 a.m., Dolak went to his mother's home in the 3200 block of Opal Street and set that property on fire as well. According to Police Sgt. Robert Watt, "He confronted the officers and failed to comply with their demands and ultimately there was an officer-involved shooti…	http://homicide.latimes.com/post/asa-james-dolak/		Yes		I've already requested to receive updates.
NCAlleghany	2014-08-22 19:03:39	2013-12-26	NC - North Carolina	Alleghany	Sparta	Alleghany Sheriff’s Department	Mitchell Allen Street	51	Male	White	Unknown	White		Killed	Armed	Rifle	Deputies from the Alleghany County Sheriff’s Office, as well as the Sparta police officer, went to Arnies Lane in Sparta on a report of a domestic situation. When they got there, they saw Mitchell Allen Street, 51, of 78 Arnies Lane, with a high-powered rifle, according to a news release from the Alleghany County Sheriff’s Office. The sheriff’s office said in the news release that the officers id…	http://www.wxii12.com/news/local-news/foothills/man-killed-in-officerinvolved-shooting/23675254#!bIrJzn	Steven Carrier, Joseph Choate	Yes	4	Add me!	Bailey	bailey.r.smith@gmail.com	baileyspace
NMValencia	2014-08-22 19:54:04	2013-12-26	NM - New Mexico	Valencia	Los Lunas	Los Lunas Police Department	Ruben Sanchez	50	Male	Unknown	Hispanic or Latino origin	Hispanic	2	Hit	Armed	Rifle	Officers arrived and observed a male subject standing in the open west doorway, with his hands around a long object held as a long rifle pointing forward from his shoulder. The specific hand placement, arm configuration, and finger configuration appeared to be his left hand gripping a fore stock, his right hand holding a rear stock and his right fingers placed in a trigger position of a long rifl…	http://www.dps.state.nm.us/index.php/update-to-los-lunas-police-department-shooting-on-thursday-december-26-2013/	John Valdez	Yes		I've already requested to receive updates.
GACobb	2014-08-20 18:20:53	2013-12-27	GA - Georgia	Cobb	Atlanta	Cobb County Police Department	John Allen Massey	30	Male	White	Unknown	White		Killed	Armed	Handgun	Cobb County Police responded to investigate claims of a stolen motorcycle in the parking lot of an Extended Stay America Hotel in Cobb County, outside Atlanta. Officers B. Abernathy and D. Mangold (no first names released) "came into contact with" John Allen Massey, 30, in one of the hotel rooms. A physical altercation somehow ensued and cops say Massey produced a handgun. Massey was shot and kil…	http://www.cbs46.com/story/24317007/cobb-pd-investigating-a-fatal-officer-involved-shooting	B. Abernarthy or D. Mangold
ILCook	2014-08-21 23:49:30	2014-01-01	IL - Illinois	Cook	Chicago	Chicago Police	Princeton G. Burton-Williams	25	Male	Black or African American	Not of Hispanic or Latino origin	Black		Hit	Armed	Handgun		http://articles.chicagotribune.com/2014-01-04/news/chi-2-charged-in-policeinvolved-new-years-shooting-20140104_1_chicago-police-williamson-bond-court		Yes	3
OKMuskogee	2014-08-21 03:29:51	2014-01-02	OK - Oklahoma	Muskogee	Muskogee	Muskogee Police	Thomas Wayne Estes	34	Male	Black or African American	Unknown	Black	1	Hit	Unarmed	Unarmed	Officers stop stolen car w/3 occupants. Arrest driver and female passenger, Estes resists and goes for officers weapon. He is shot once by Poffel	http://www.muskogeephoenix.com/archives/article_4751f8d9-05b4-55f7-87fa-a9e3cf2a11e0.html	Officer Joe Poffel	Yes
COAdams	2014-08-20 12:25:46	2014-01-03	CO - Colorado	Adams	Thornton	Thornton Police Department	Wesley Maldonado	35	Male	Unknown	Hispanic or Latino origin	Hispanic	1	Killed	Armed	Firearm; not stated	Suspect was involved in domestic violence.	http://www.denverpost.com/news/ci_24838223/thornton-police-scene-reported-shootout-car-chase-suspect
AZCochise	2014-08-25 11:07:21	2014-01-04	AZ - Arizona	Cochise	Sierra Vista	Sierra Vista PD	Michael Estrada	49	Male	Unknown	Hispanic or Latino origin	Hispanic		Killed	Armed	Knife or cutting instrument	officers responded to the location to find Michael Estrada, 49, in the front yard of the residence with a machete. According to a release from the department and statements from one of the responding officers, Estrada made aggressive movements and statements about wanting to have a confrontation with police before moving toward one of the officers. It was then that Officer Michael Rathmann, a 13-…	http://www.bensonnews-sun.com/news/article_abbb59b8-77ed-11e3-a3f4-001a4bcf887a.html	Michael Rathmann	Yes	4	I've already requested to receive updates.
COPueblo	2014-08-20 17:01:13	2014-01-04	CO - Colorado	Pueblo	Pueblo	City of Pueblo Police Department	Frankie Martinez	66	Male	Unknown	Hispanic or Latino origin	Hispanic		Killed	Armed	Firearm; not stated	Police were called when Martinez shot another man (who was not killed). The SWAT team came and Martinez came to the door pointing a firearm at them. The police officers involved were put on administrative leave during the investigation.	http://www.pueblo.us/DocumentCenter/View/6169	Jeff Carpenter and Richard Giconi
NCBrunswick	2014-08-21 20:28:21	2014-01-05	NC - North Carolina	Brunswick	Boiling Spring Lakes	Southport Police Dept	Keith Vidal	18	Male	White	Unknown	White	1	Killed	Unarmed	6in screwdriver	A Brunswick County Grand Jury has indicted Southport police officer Bryon Vassey on voluntary manslaughter charges in the death of Keith Vidal, according to the District Attorney's Office. Vidal was shot and killed in Boiling Spring Lakes Jan. 5.	http://www.wwaytv3.com/2014/01/05/father-says-18-year-old-son-murdered-southport-police-officer	Bryon Vassey	Yes	1
MDBaltimore	2014-08-20 17:06:10	2014-01-13	MD - Maryland	Baltimore	Baltimore	Baltimore City Police Department	Perry Webb	24	Male	Black or African American	Unknown	Black		Killed	Armed	Other Gun	Police fired several shots at Mr. Webb, but contend that the fatal bullet - to his head - was self-inflicted. Data on other uses of force in Baltimore and surrounding area in 2014 can be found here:	http://www.baltimoresun.com/news/maryland/crime/blog/bal-police-say-reported-police-shooting-victim-shot-himself-20140130,0,3550038.story
AZPinal	2014-08-21 03:46:45	2014-01-14	AZ - Arizona	Pinal	Eloy	Pinal County Sheriff’s Office	Manuel Orosco Longoria	40	Male	Unknown	Hispanic or Latino origin	Hispanic	2	Killed	Unarmed	Rifle	72 minute chase ended, Deputy Heath Rankin fired rifle twice believing Longoria was reaching for weapon	http://www.azfamily.com/news/Pinal-County-deputy-cleared-in-Eloy-shooting-264984851.html	Deputy Heath Rankin	Yes
INElkhart	2014-08-20 17:17:09	2014-01-15	IN - Indiana	Elkhart	Elkhart	Elkhart Police Department	Sean Bair		Male	White	Not of Hispanic or Latino origin	White	10	Killed	Armed	Handgun	The victim was holding up a supermarket and had already shot at people inside the supermarket (including one fatality). He refused to obey officer commands to lower his weapon and was shot and killed. The County Prosecutor declined to press charges against the officers.	http://www.elkhartcountyprosecutor.com/news/press-releases/officers-actions-reasonable-martins-shooting	Cody Skipper and Jason Tripp
MIWayne	2014-11-16 15:45:43	2014-01-18	MI - Michigan	Wayne	Westland	Westland Police	Troy Hart	27	Male	White	Unknown	White		Killed	Armed	Knife or cutting instrument	Troy Hart was diagnosed with Kallmann Syndrome which affects his maturity. His mother described him as an eight year old in an adults body. He has tantrums sometimes as a child does and left the house in his pajamas and a knife. His mother called 911 and asked them to take her son to a psychiatric hospital but when police officers got to her home they shot her son.	http://www.myfoxtampabay.com/story/27338272/police-man-dies-in-police-involved-shooting		Yes	1	No thanks.				2014-11-08	1	This is the first incident I am logging.
NCNewHanover	2014-08-20 23:32:52	2014-01-28	NC - North Carolina	NewHanover	Wilmington	Wilmington Police Department	Grace Louise Denk	21	Female	White	Not of Hispanic or Latino origin	White	4	Killed	Armed	Handgun	Victim had a fight with her boyfriend, who called police and said she was suicidal. Police found her outside in her car with a gun, and began screaming at her to get down, and broke out her back car window. Shots were exchanged and victim was killed.	http://www.starnewsonline.com/article/20140609/ARTICLES/140609667/0/FRONTPAGE?tc=ar	Officer Ian Lovell	Yes
MNHennepin	2014-08-28 11:33:52	2014-02-07	MN - Minnesota	Hennepin	Eden Prairie	Eden Prarie PD	Dawn M. Pfister	34	Female	White	Not of Hispanic or Latino origin	White	20	Killed	Unarmed	Unarmed	Police stop car after high speed chase. Two suspects emerge from vehicle, one with a knife. First suspect shot after refusing to drop knife, second shot after aparrently going for the knife. This makes the second suspect unarmed I believe.	http://minnesota.cbslocal.com/2014/02/08/2-killed-in-fridays-eden-prairie-standoff-idd/	Chaska police Sgt. Brady Juell, Chaska police officer Trent Wurtz, State Patrol Trooper Mark Lund and Carver County Sheriff’s Office Cpl. Nathan Mueller	Yes	1	No thanks.				2014-02-07	1	This is the first incident I am logging.
MNHennepin	2014-08-28 11:30:57	2014-02-07	MN - Minnesota	Hennepin	Eden Prarie	Eden Prarie PD	Matthew Vincent Serbus	36	Male	White	Not of Hispanic or Latino origin	White	20	Killed	Armed	Knife or cutting instrument	Police stop car after high speed chase. Two people emerge from car, one with a knife. Police shoot first suspect after suspect refuses to drop knife, shoot second suspect after second suspect attempts to pick up knife. There is video. I will enter the second victim as a separate incident because this form does not have a field for multiple shootings.	http://minnesota.cbslocal.com/2014/02/08/2-killed-in-fridays-eden-prairie-standoff-idd/	Chaska police Sgt. Brady Juell, Chaska police officer Trent Wurtz, State Patrol Trooper Mark Lund and Carver County Sheriff’s Office Cpl. Nathan Mueller	Yes	1	No thanks.				2014-02-07	1	This is the first incident I am logging.
[truncated: 79 more rows]
