# Supplementary material
Source: publisher figshare collection journal article supplement (https://plos.figshare.com/articles/dataset/_/1595090)
Supplement: Supplementary file 8 [file 1]

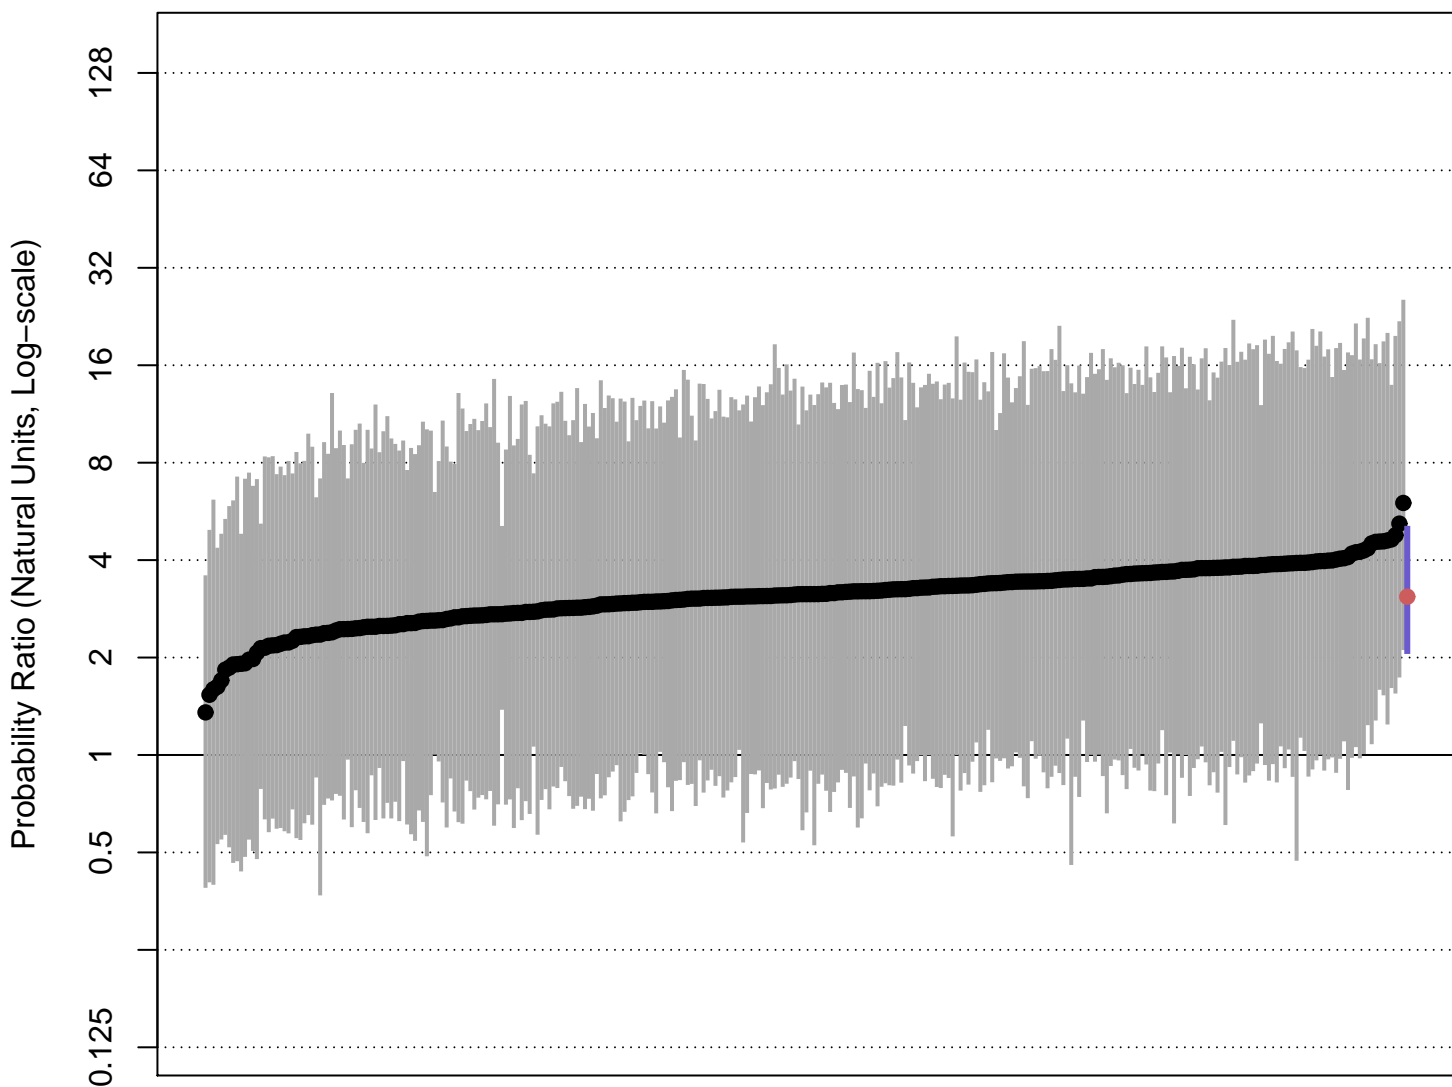

County-Level Ratio of Probabilities of Being Shot By Police: Hispanic-Armed to Hispanic-Unarmed
