# Supplementary material
Source: publisher figshare collection journal article supplement (https://plos.figshare.com/articles/dataset/_/1595090)

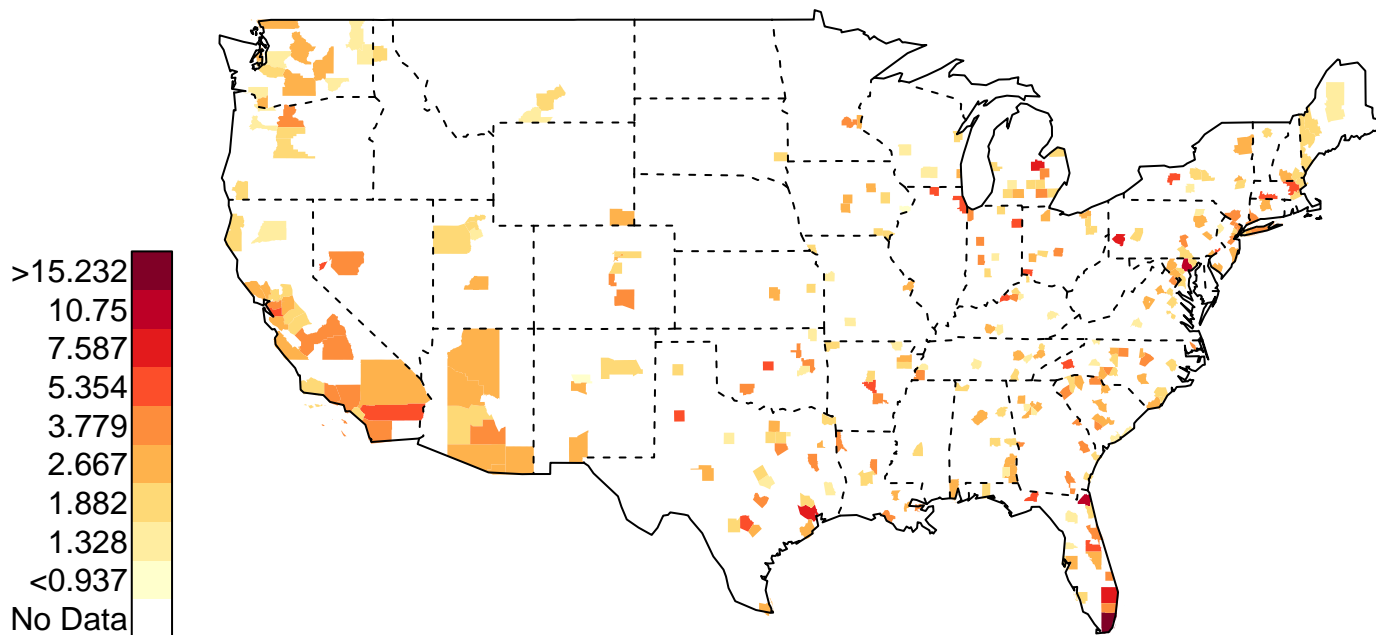

Supplement: Supplementary file 1 [file 1]

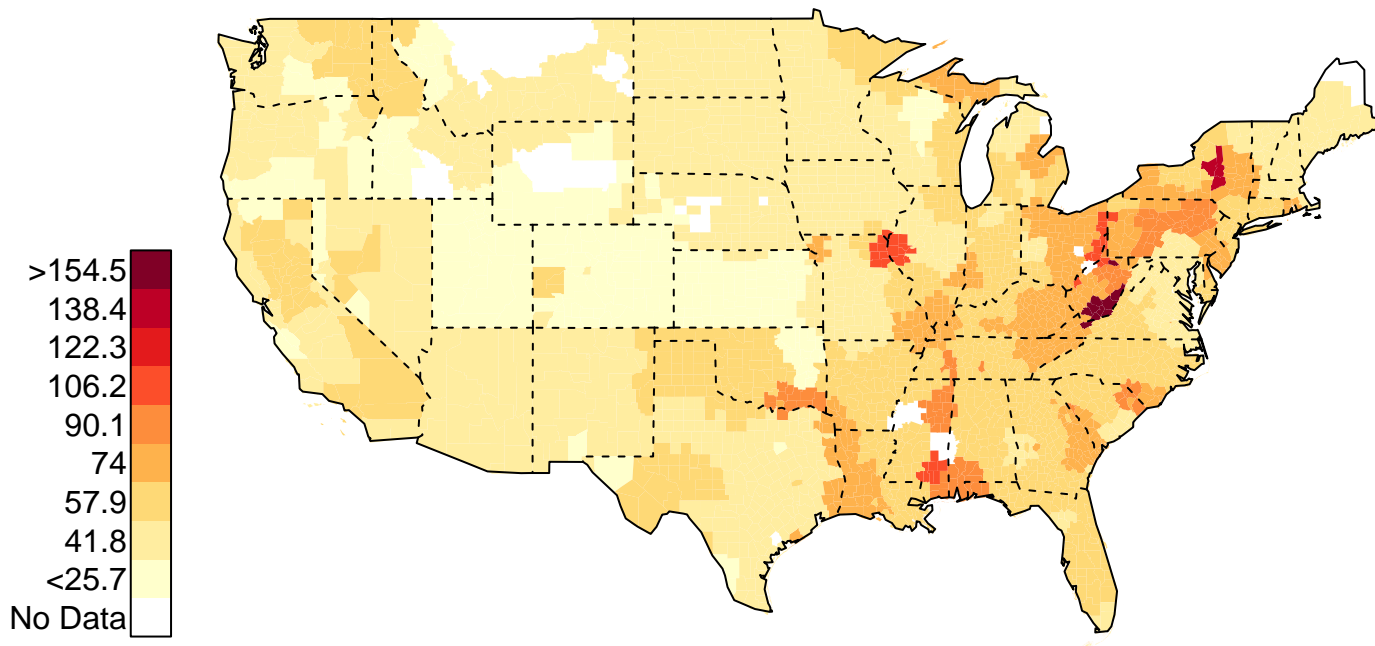

Supplement: Supplementary file 2 [file 1]

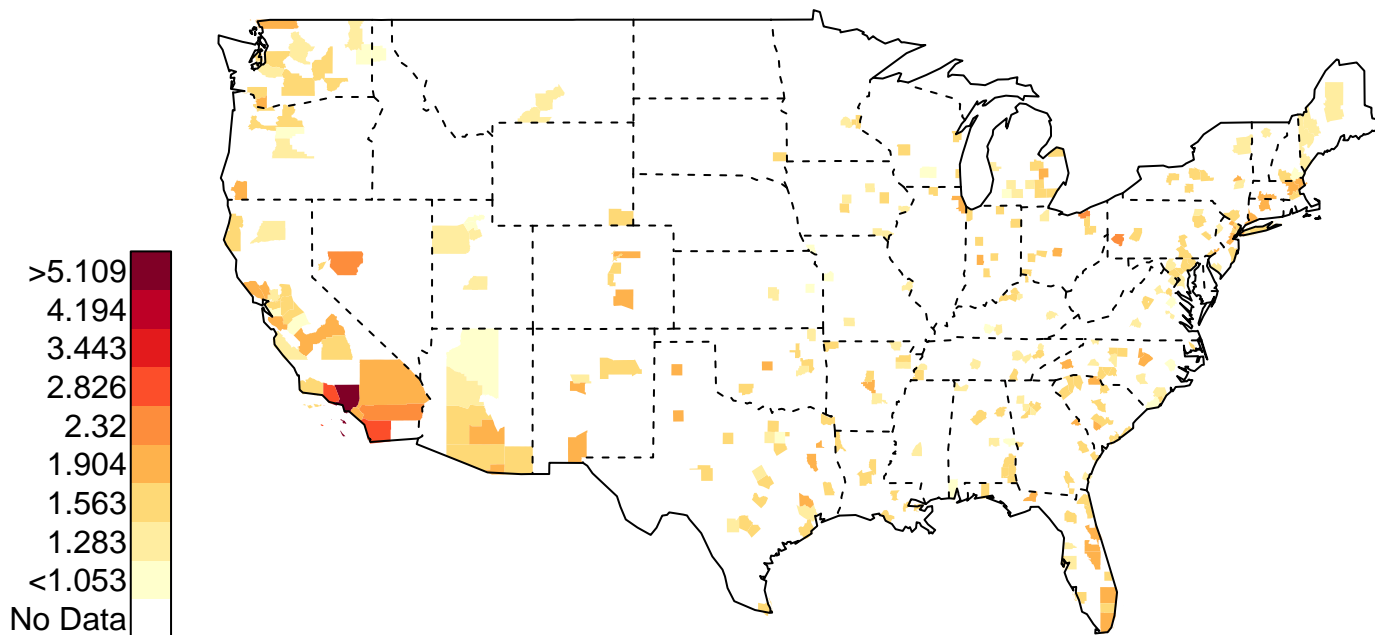

Supplement: Supplementary file 3 [file 1]

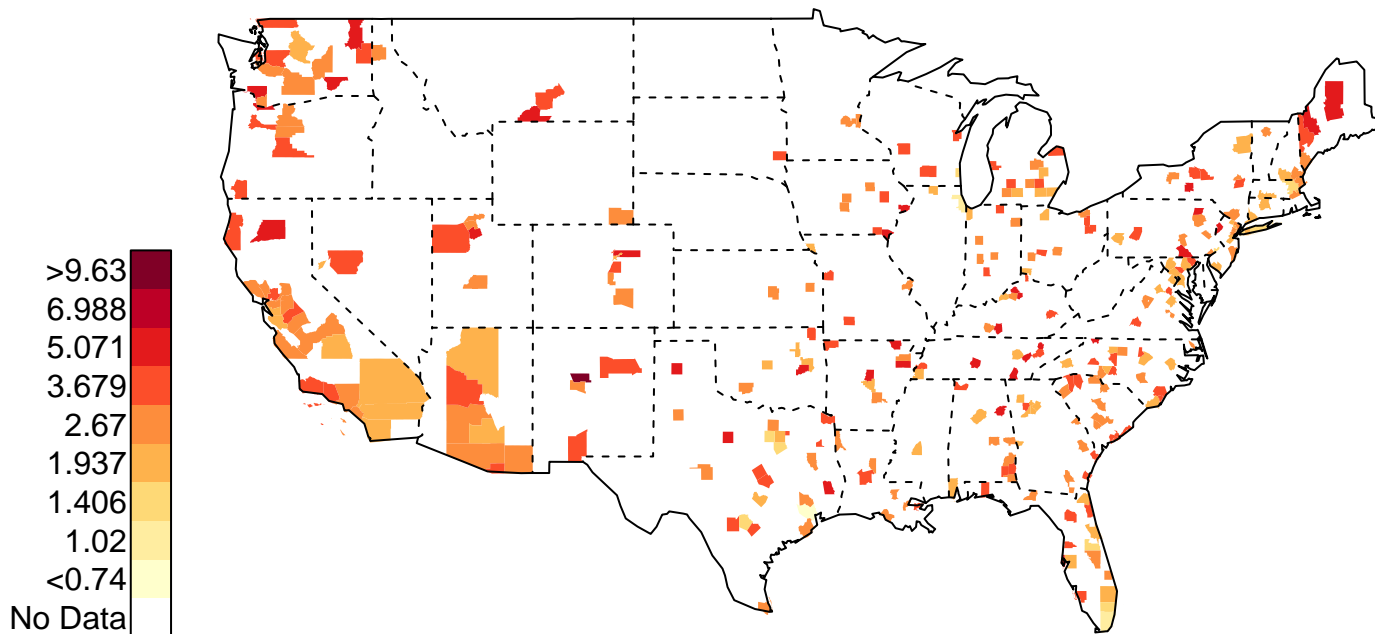

Supplement: Supplementary file 4 [file 1]

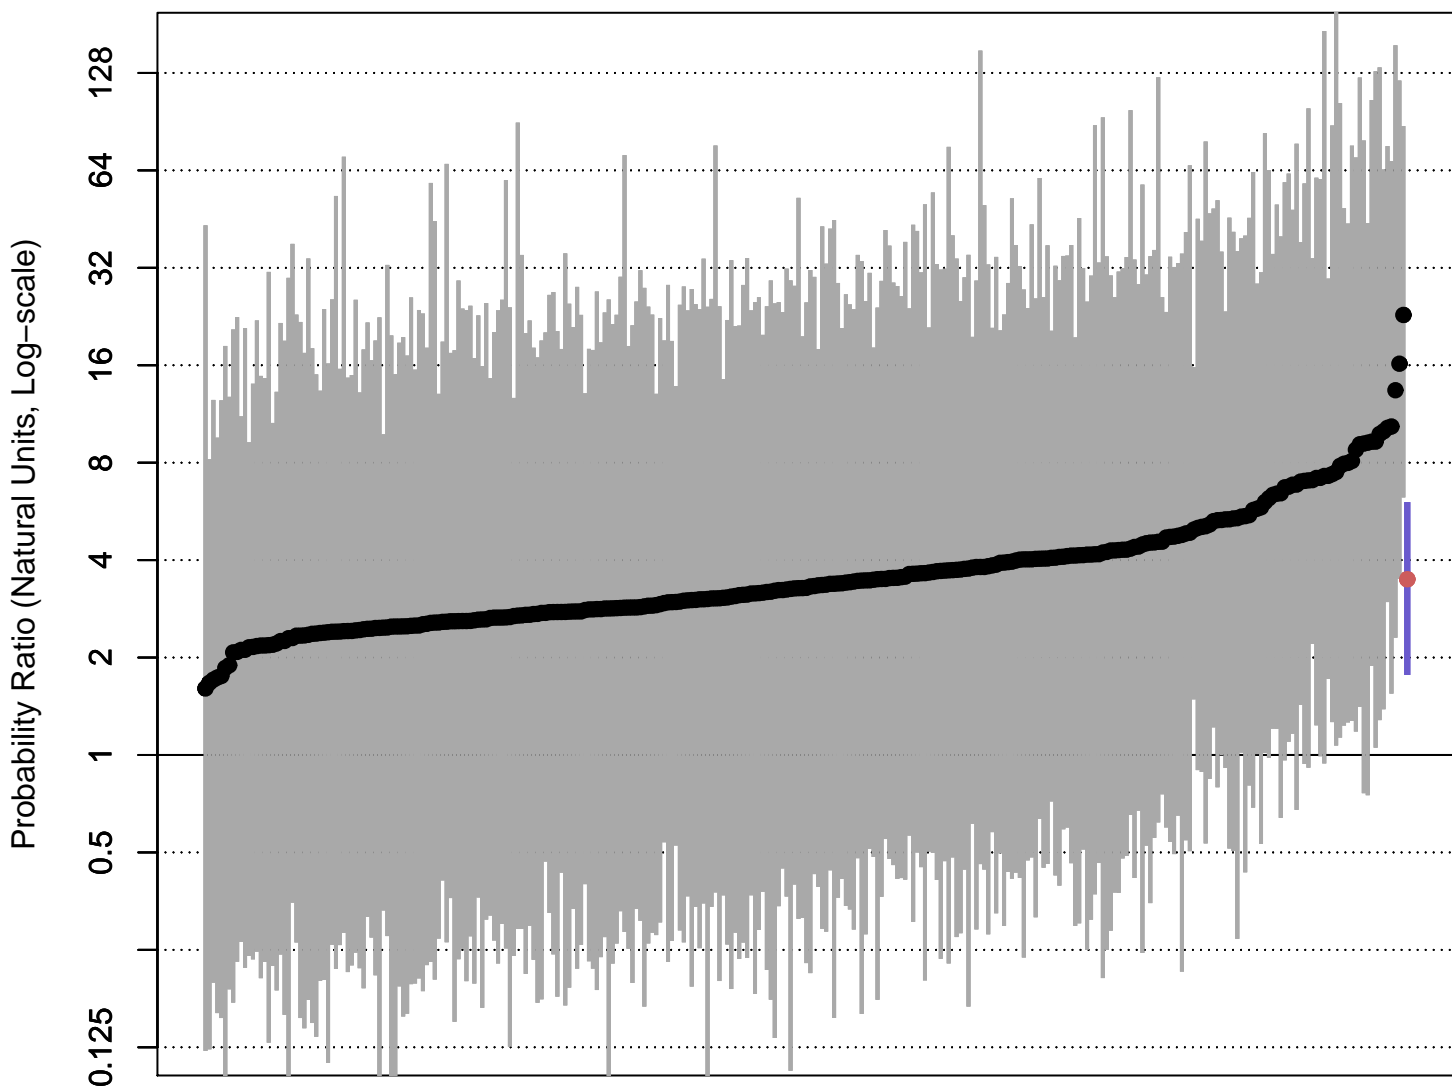

County-Level Ratio of Probabilities of Being Shot By Police: Black-Unarmed to White-Unarmed

Supplement: Supplementary file 5 [file 1]

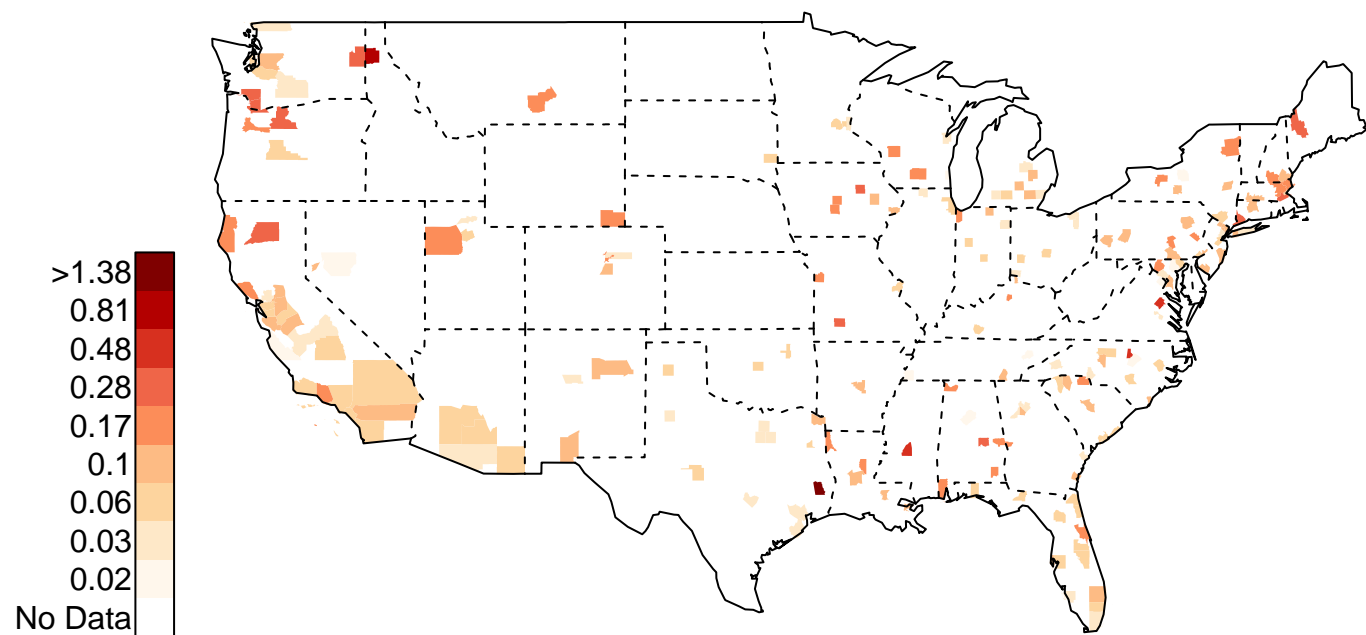

Supplement: Supplementary file 6 [file 1]

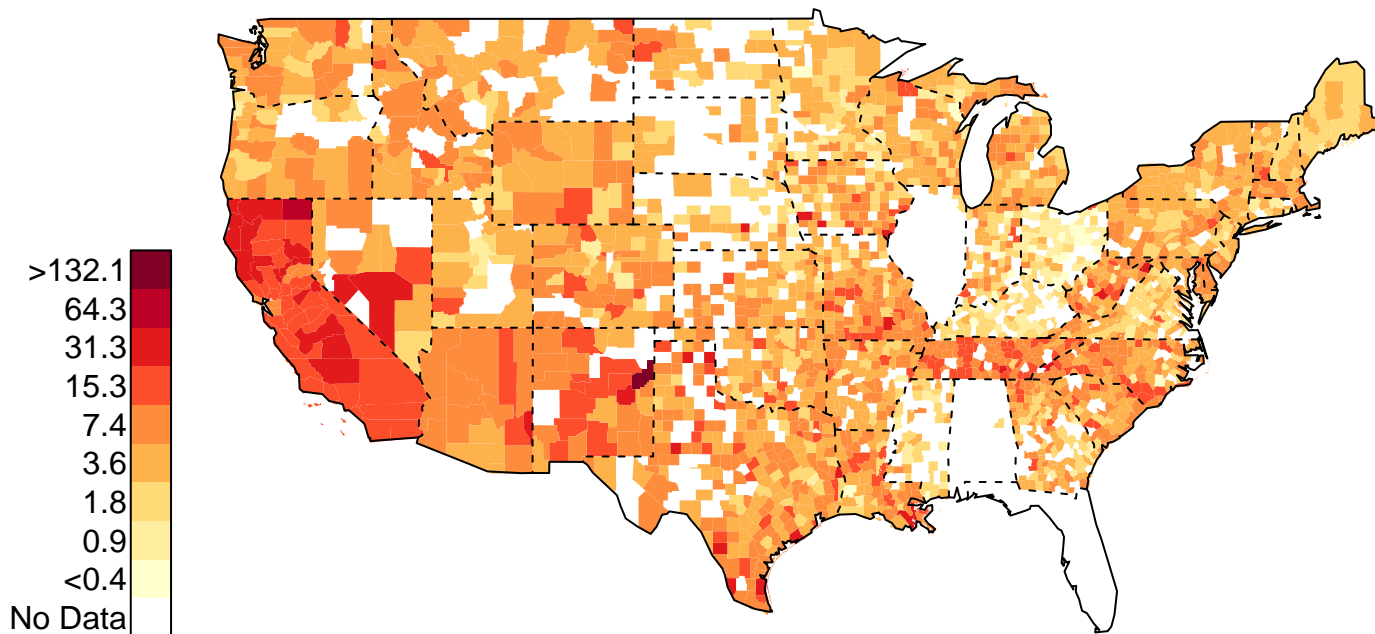

Supplement: Supplementary file 7 [file 1]

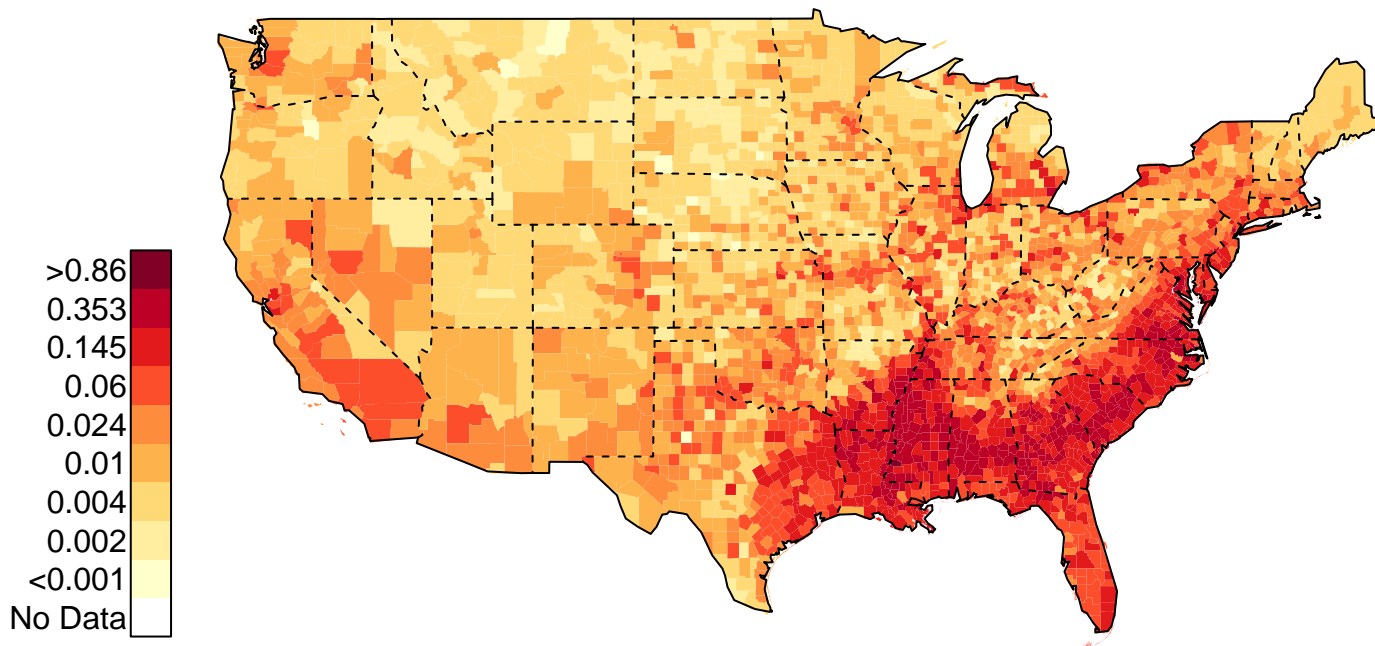

Supplement: Supplementary file 9 [file 1]

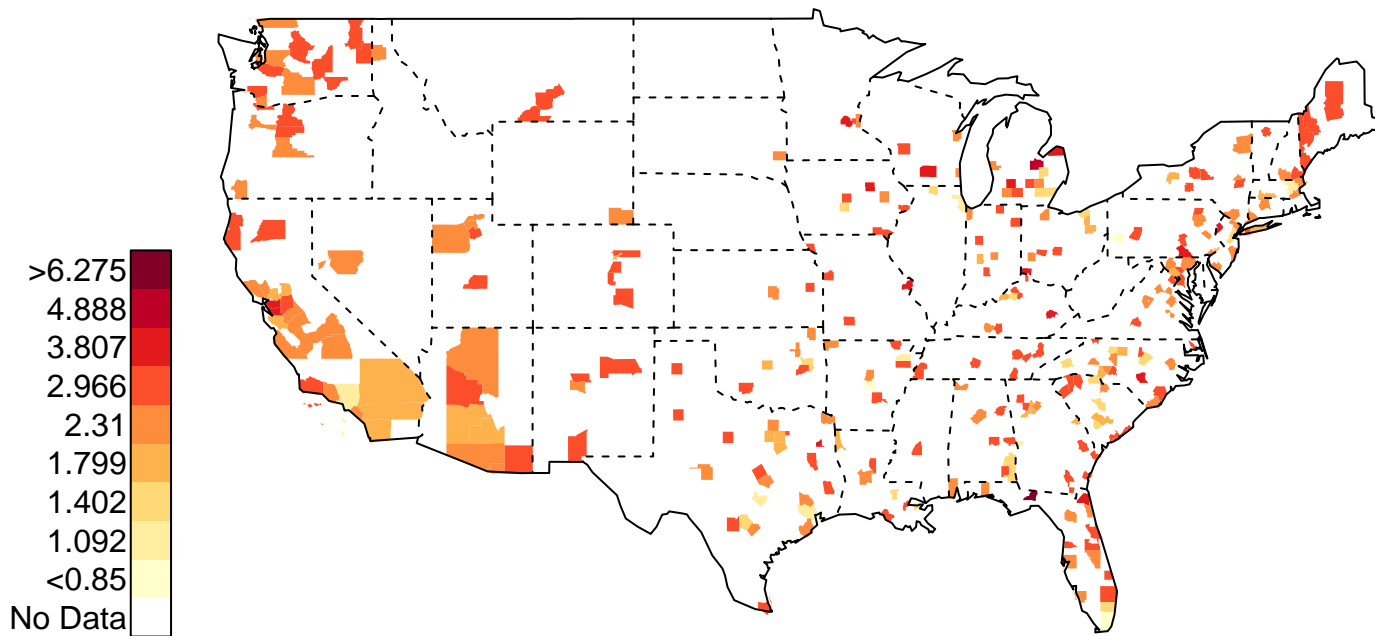

Supplement: Supplementary file 10 [file 1]

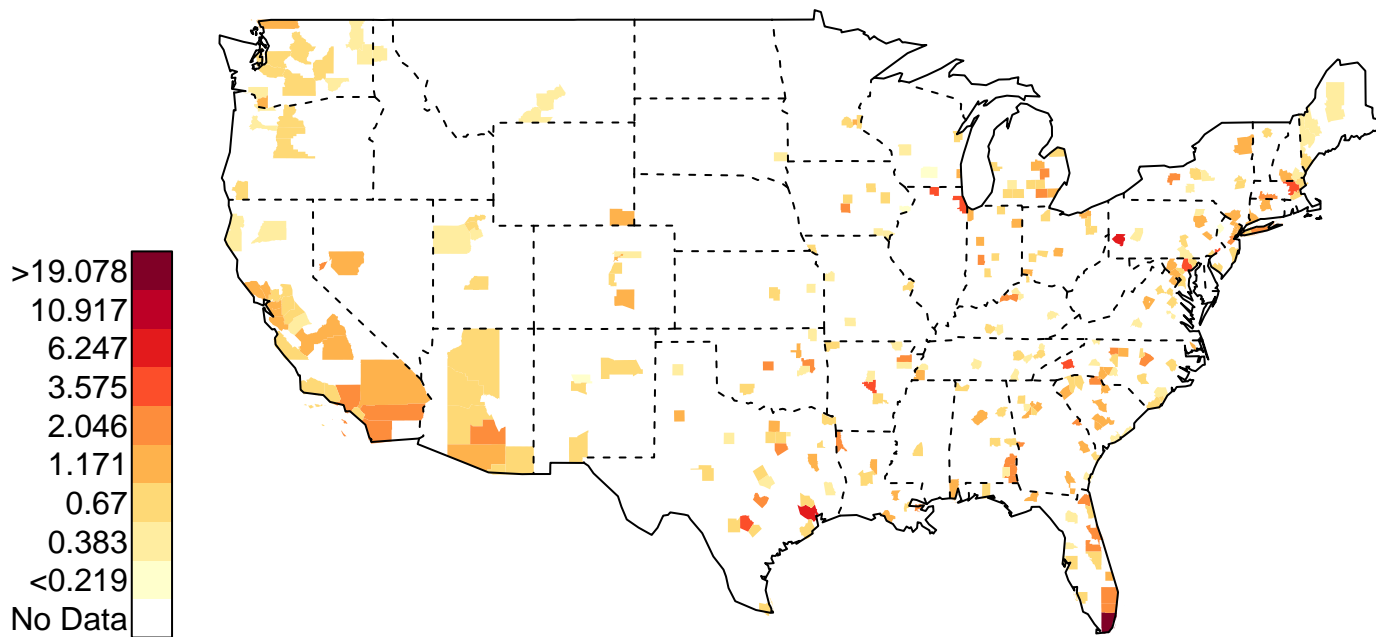

Supplement: Supplementary file 11 [file 1]

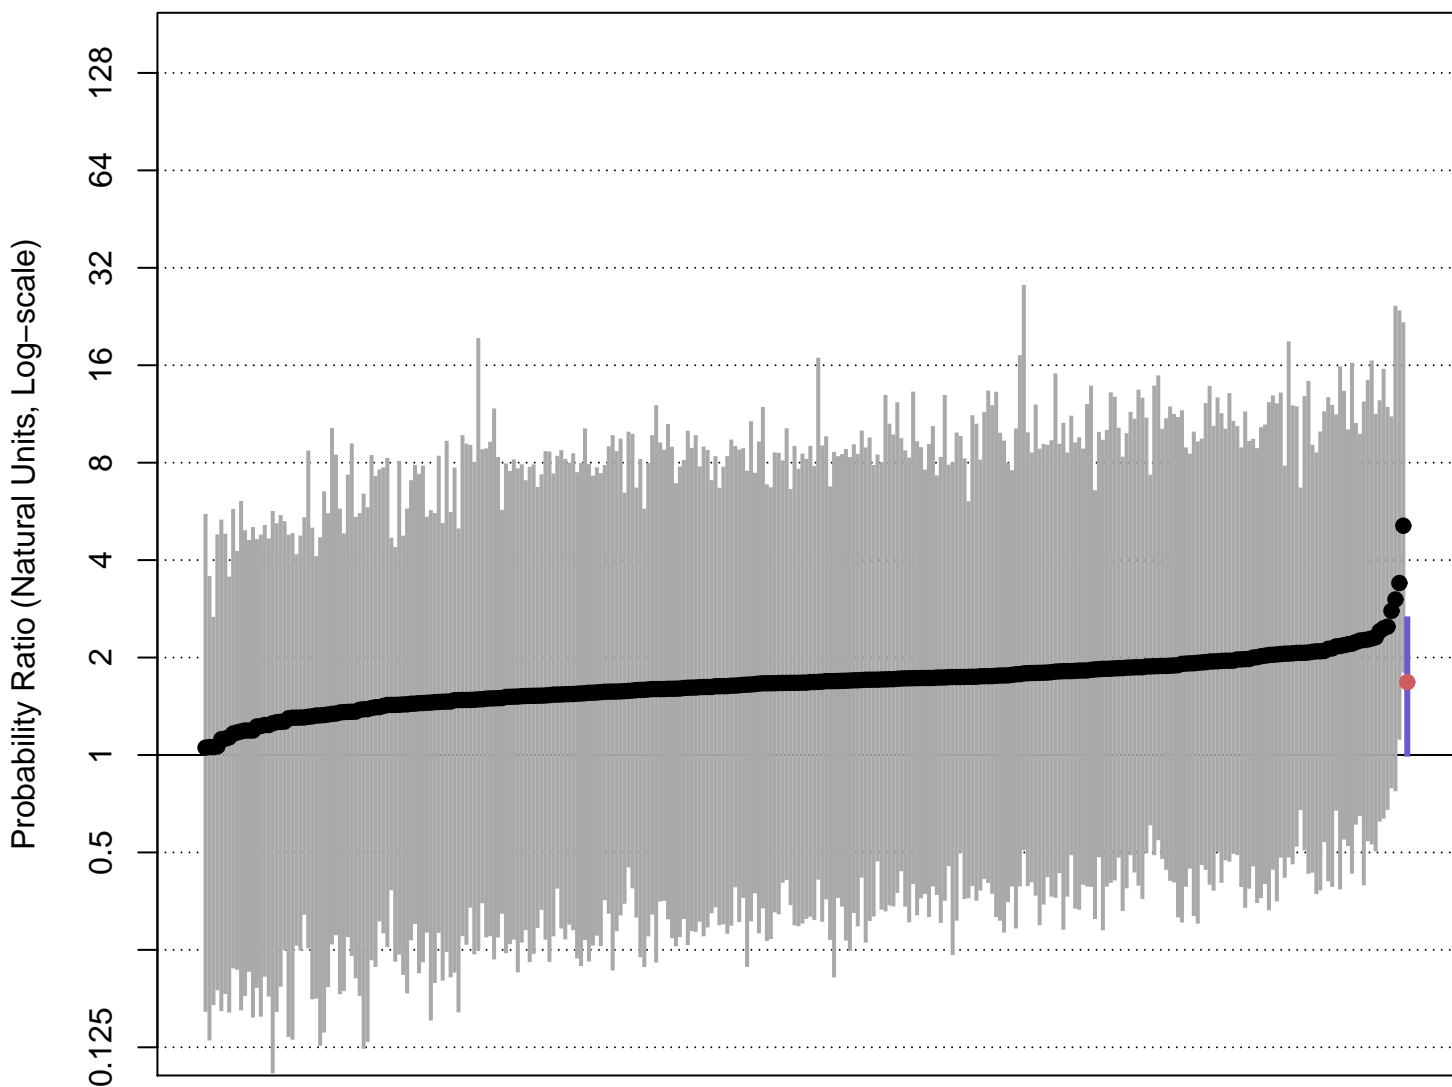

Supplement: Supplementary file 12 [file 1]

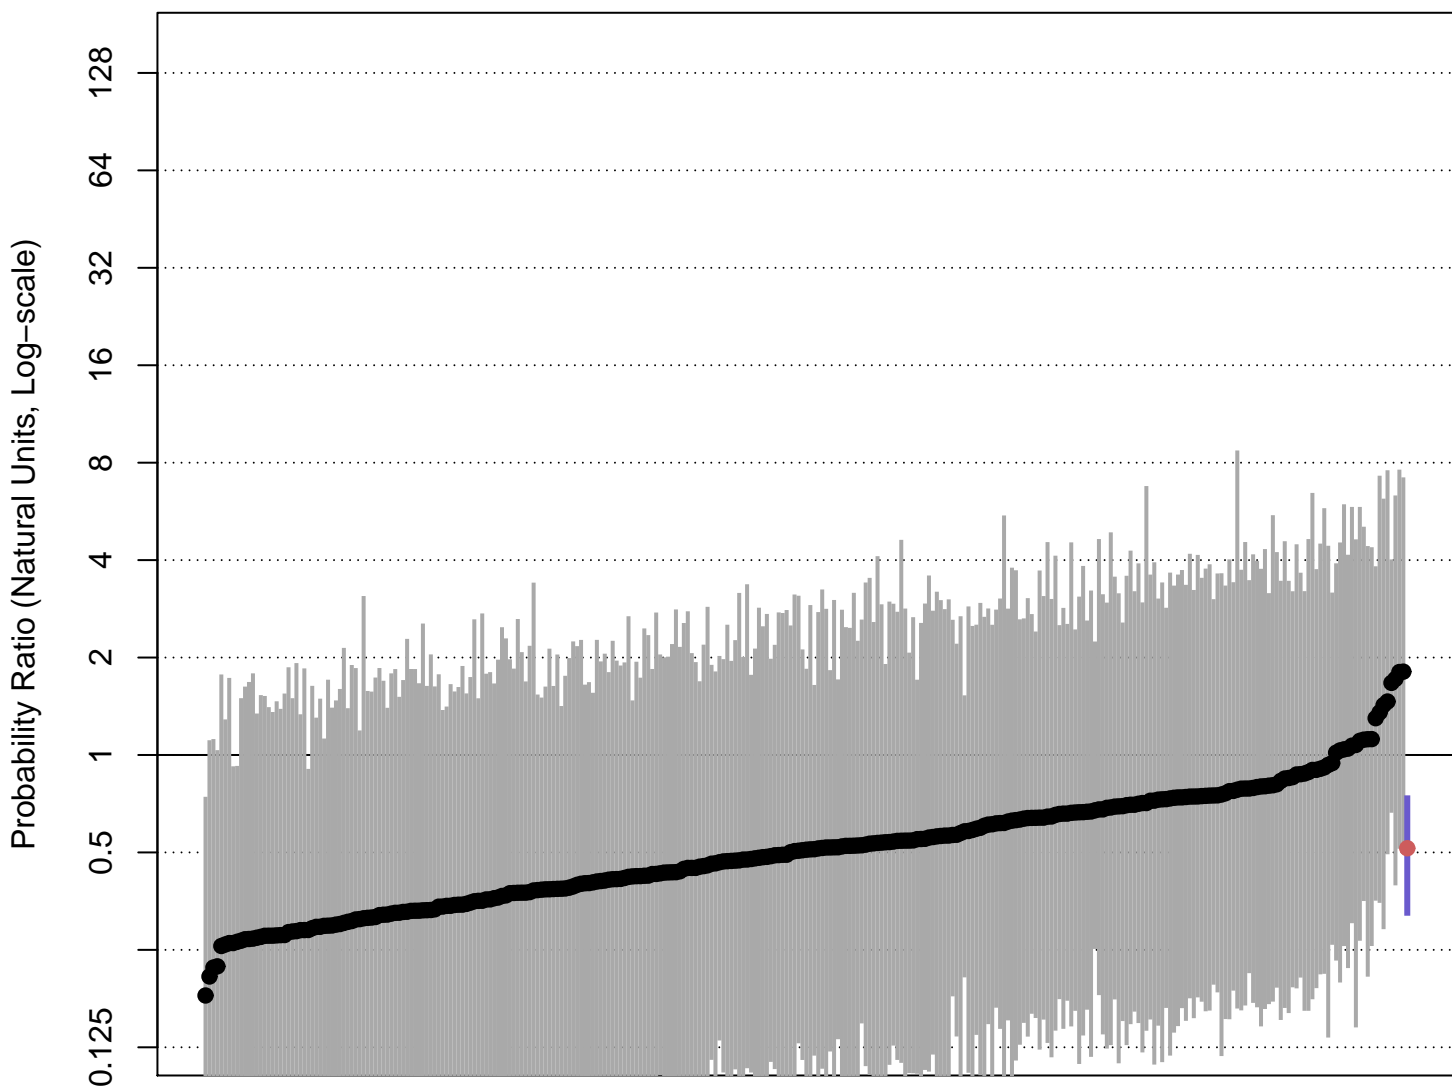

County-Level Ratio of Probabilities of Being Shot By Police: Hispanic-Unarmed to White-Armed

Supplement: Supplementary file 13 [file 1]

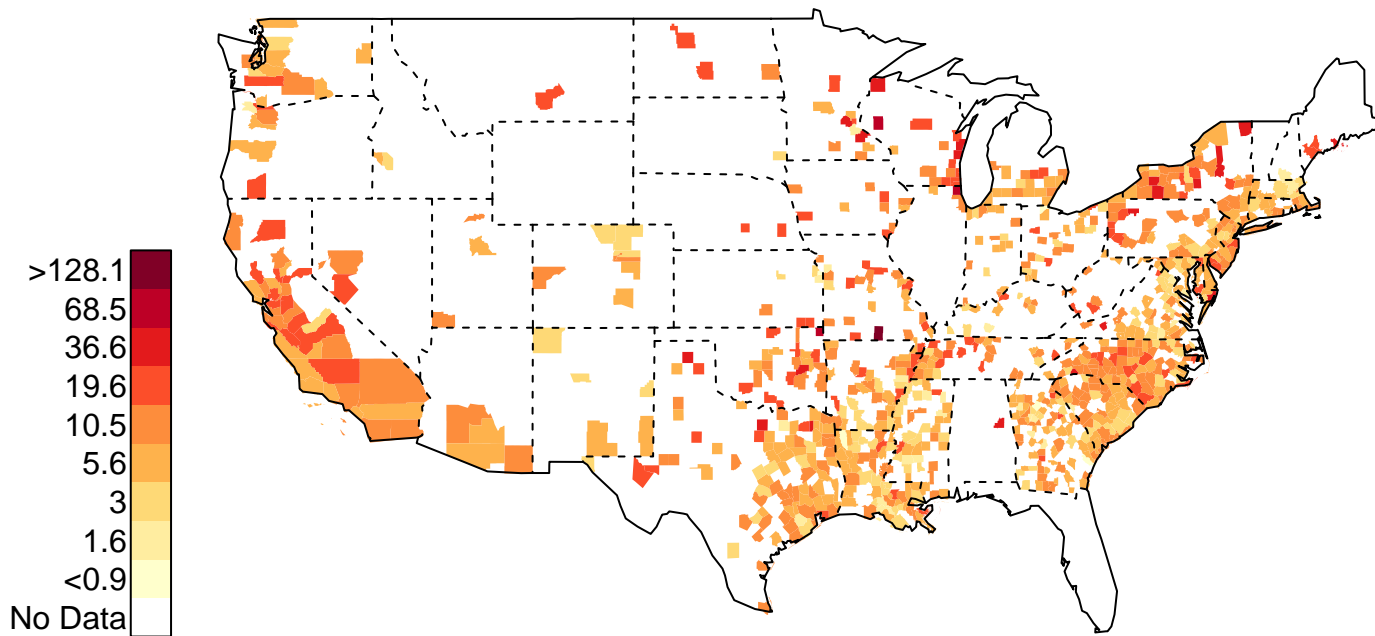

Supplement: Supplementary file 14 [file 1]

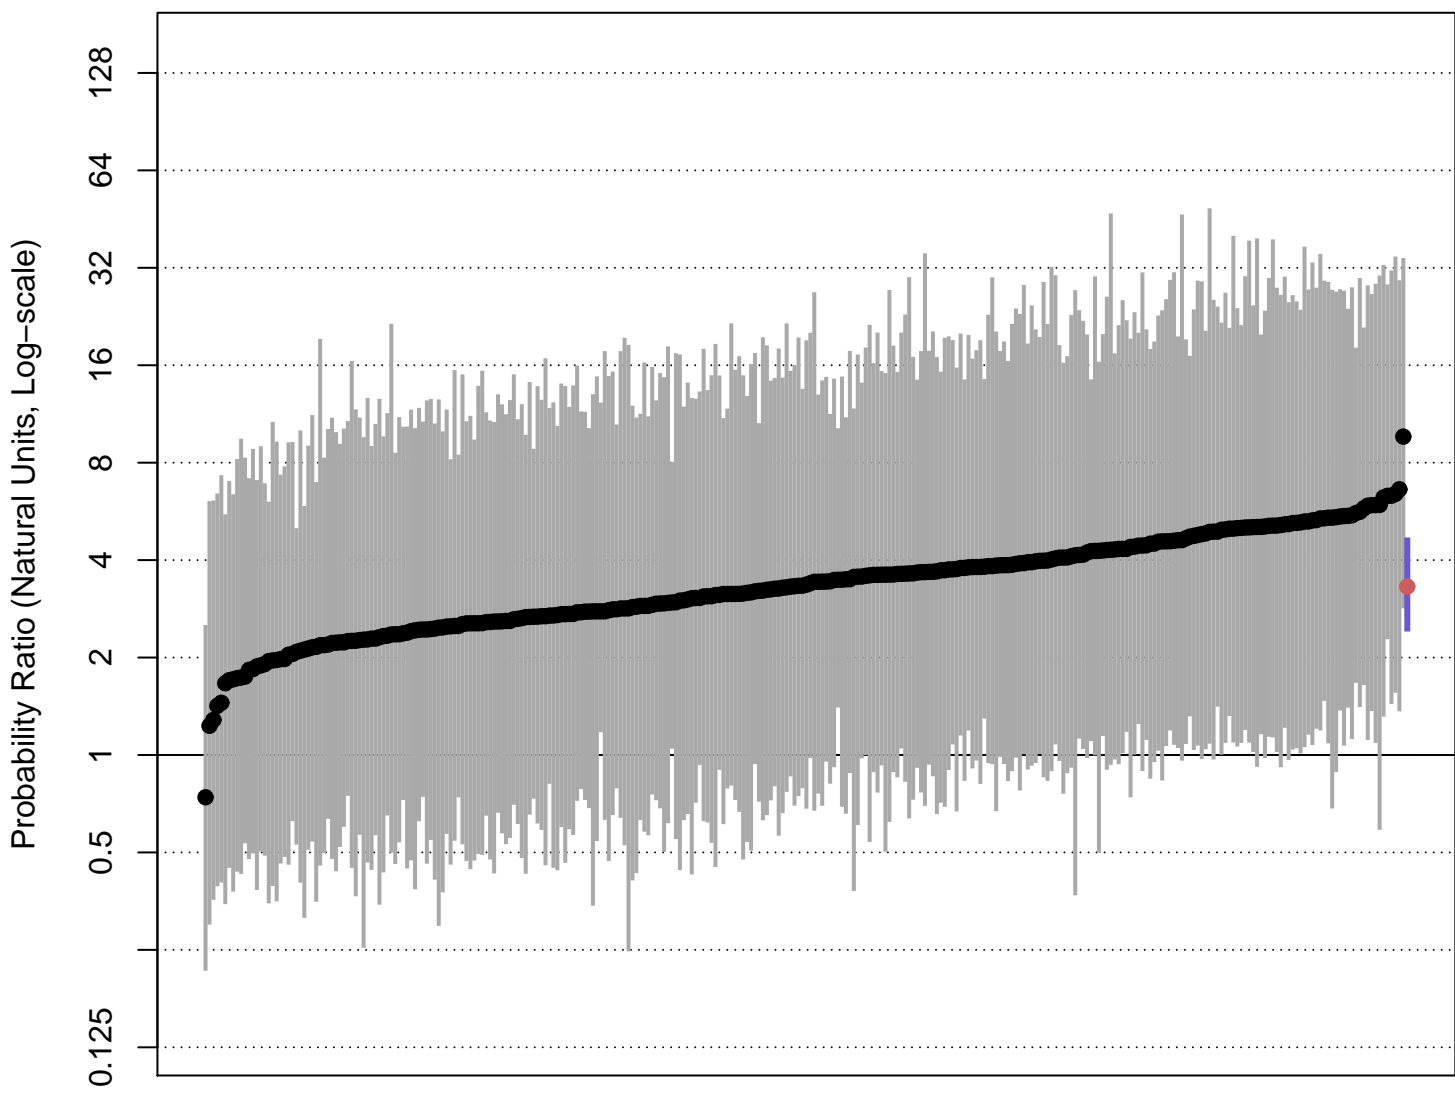

County-Level Ratio of Probabilities of Being Shot By Police: White-Armed to White-Unarmed

Supplement: Supplementary file 16 [file 1]

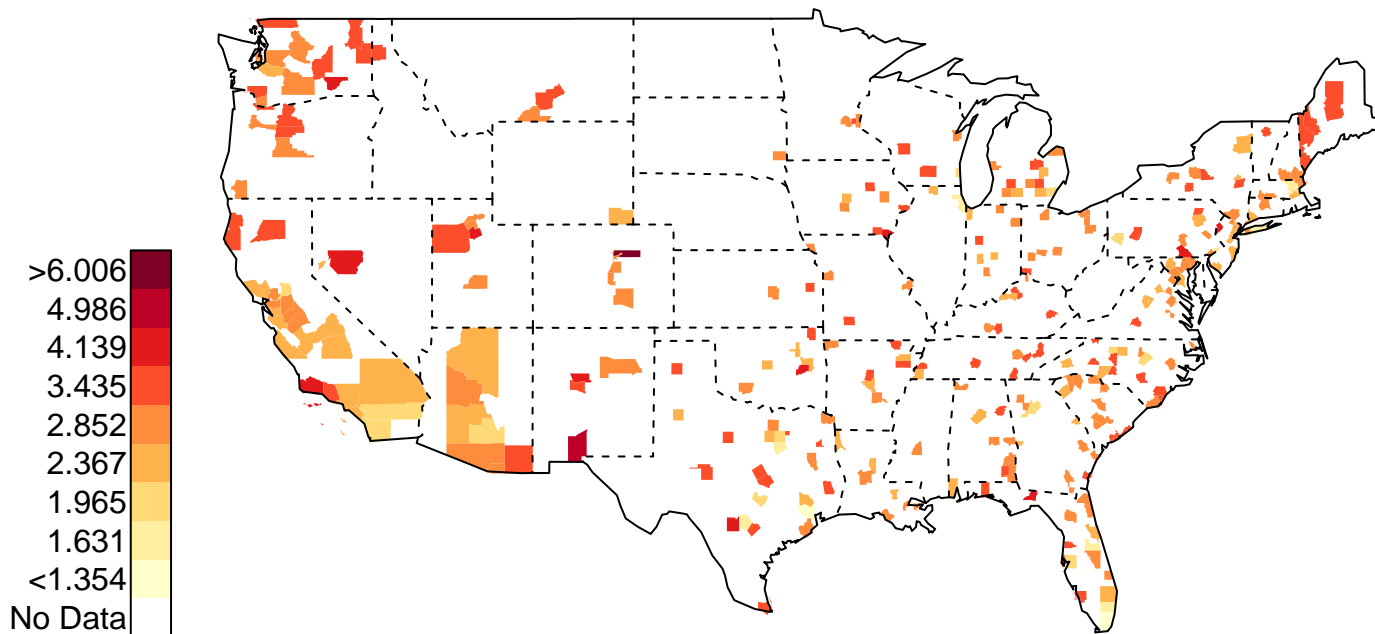

Supplement: Supplementary file 17 [file 1]

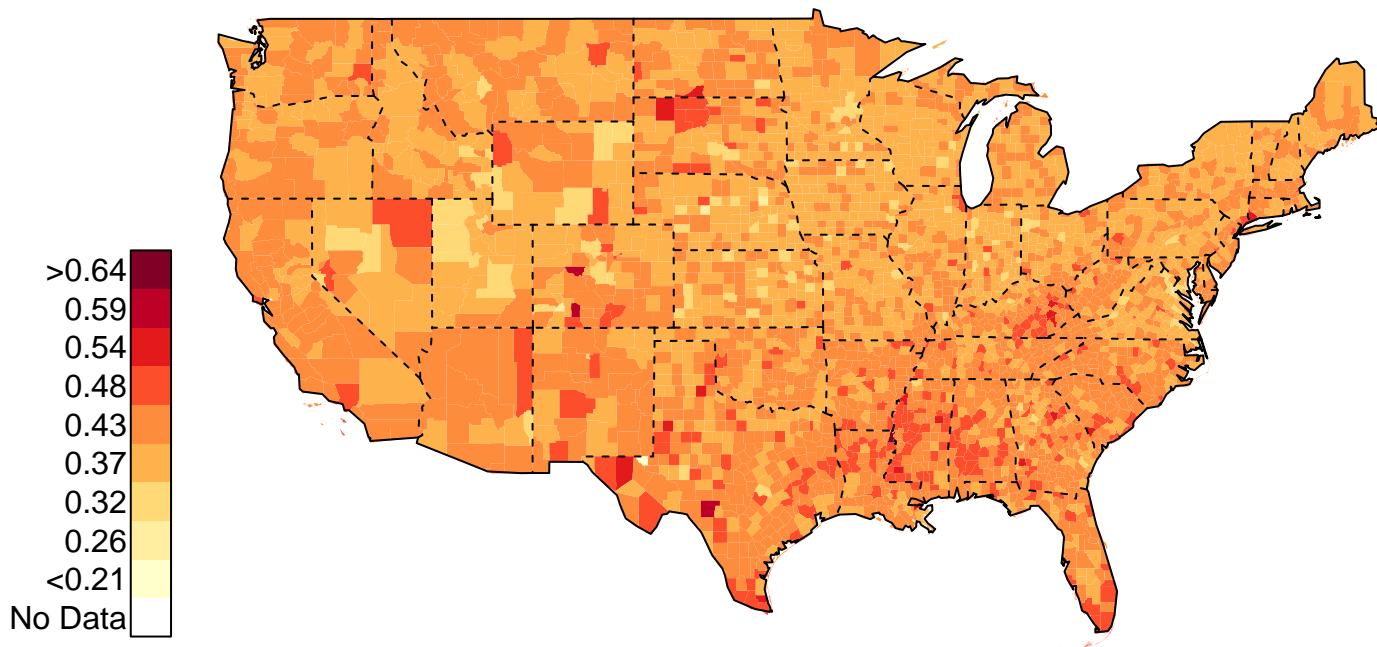

Supplement: Supplementary file 19 [file 1]

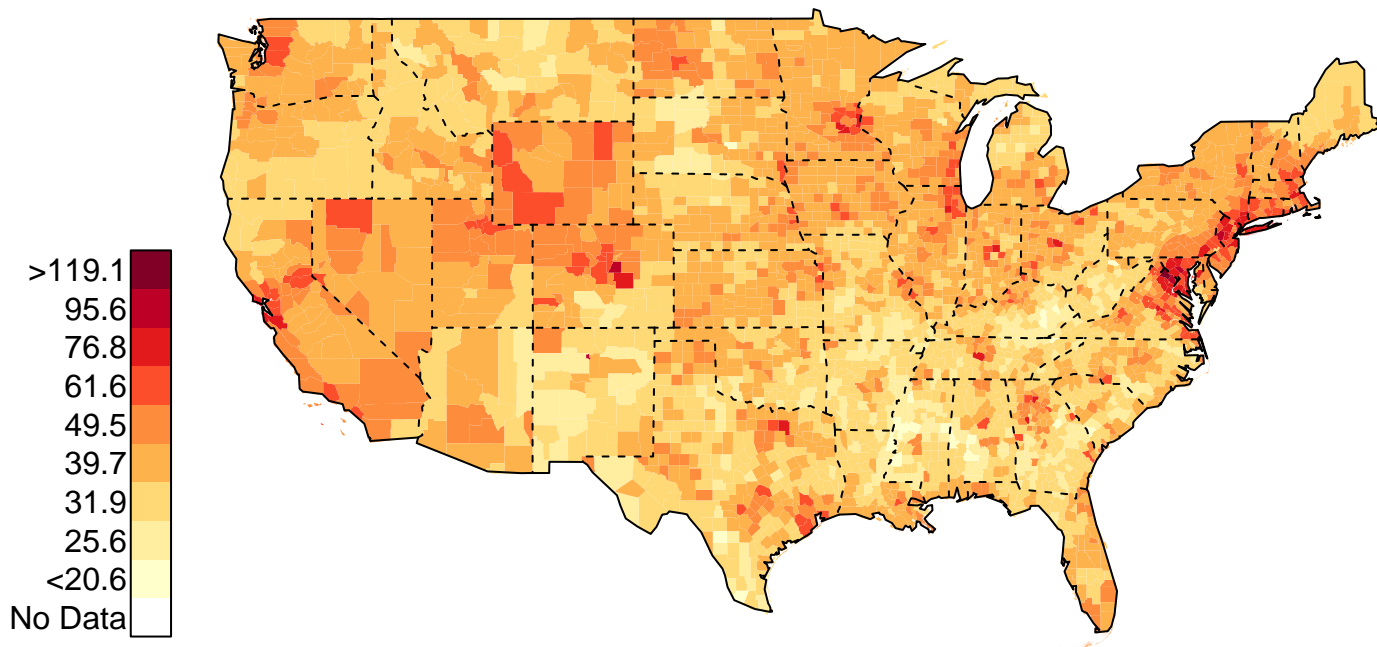

Supplement: Supplementary file 20 [file 1]

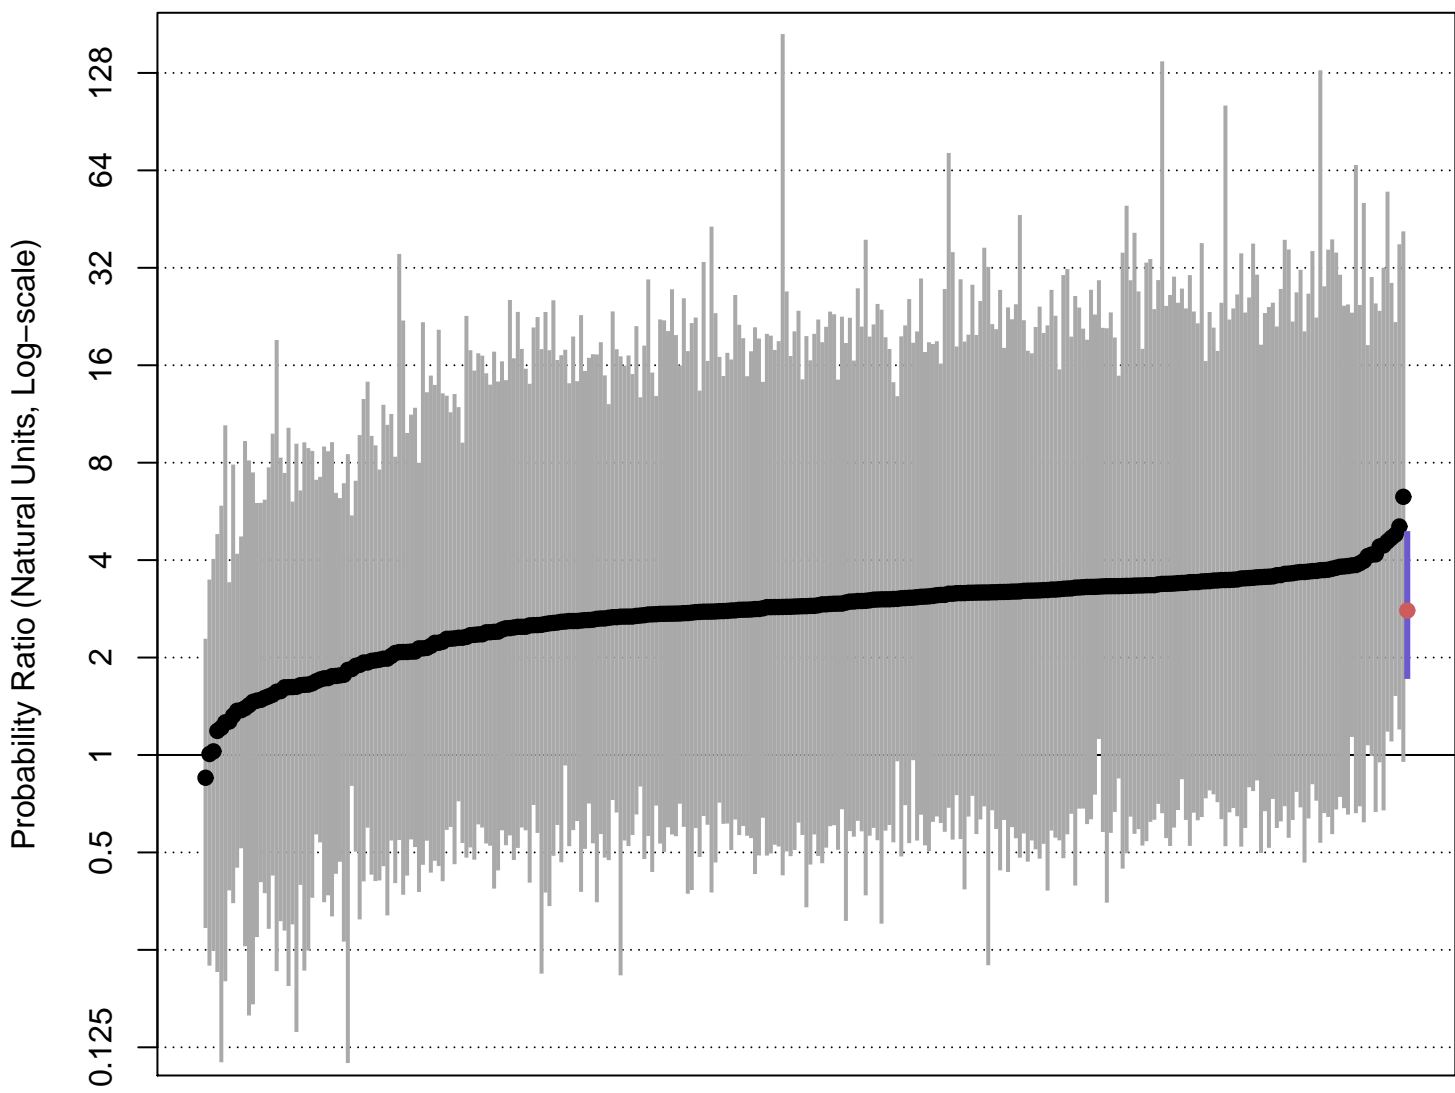

County-Level Ratio of Probabilities of Being Shot By Police: Black-Armed to Black-Unarmed

Supplement: Supplementary file 21 [file 1]

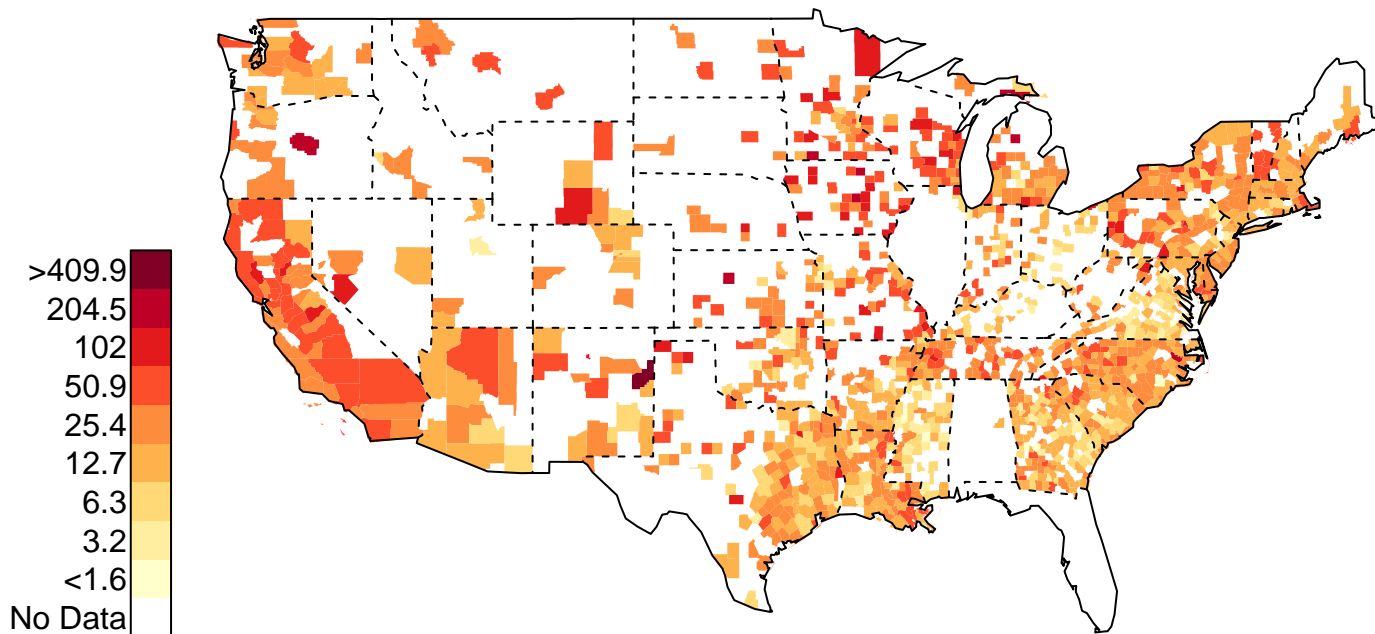

Supplement: Supplementary file 22 [file 1]

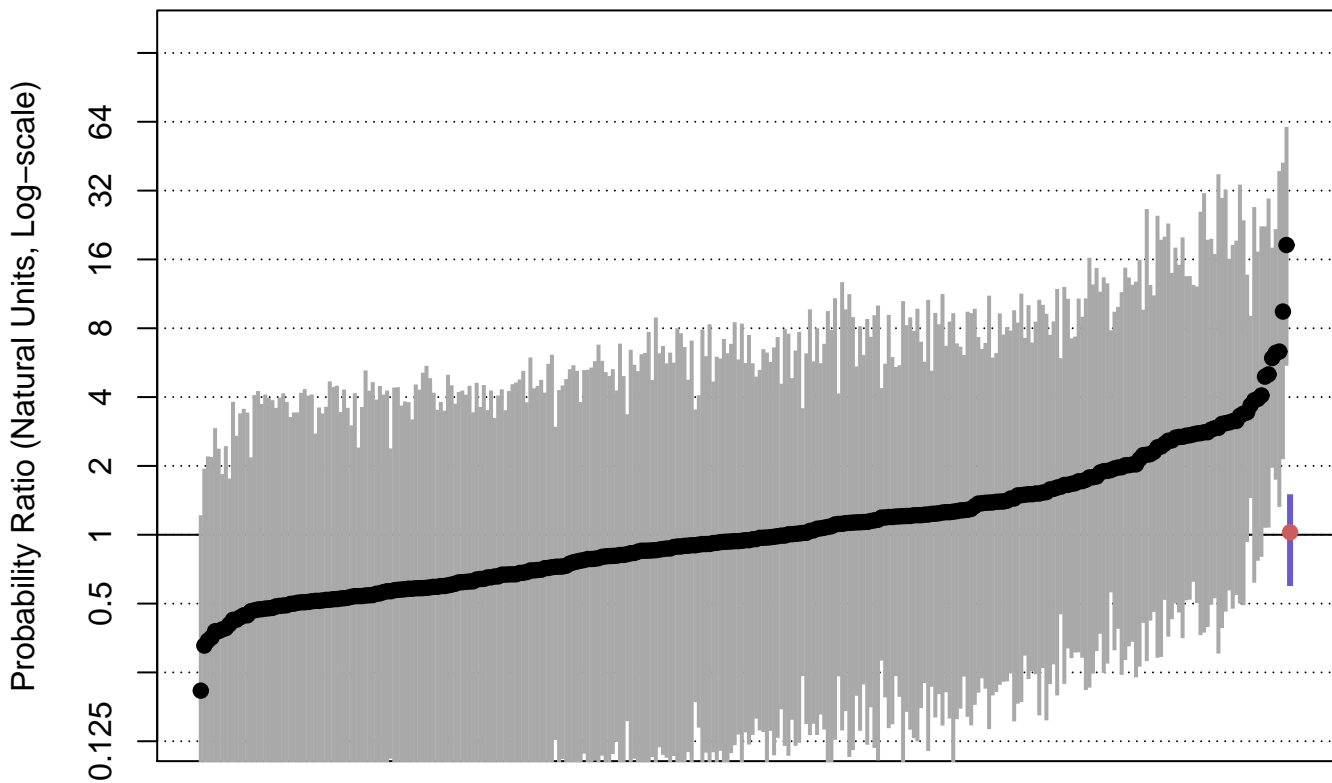

County-Level Ratio of Probabilities of Being Shot By Police: Black-Unarmed to White-Armed

Supplement: Supplementary file 23 [file 1]

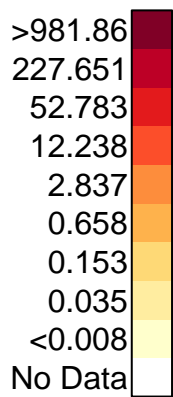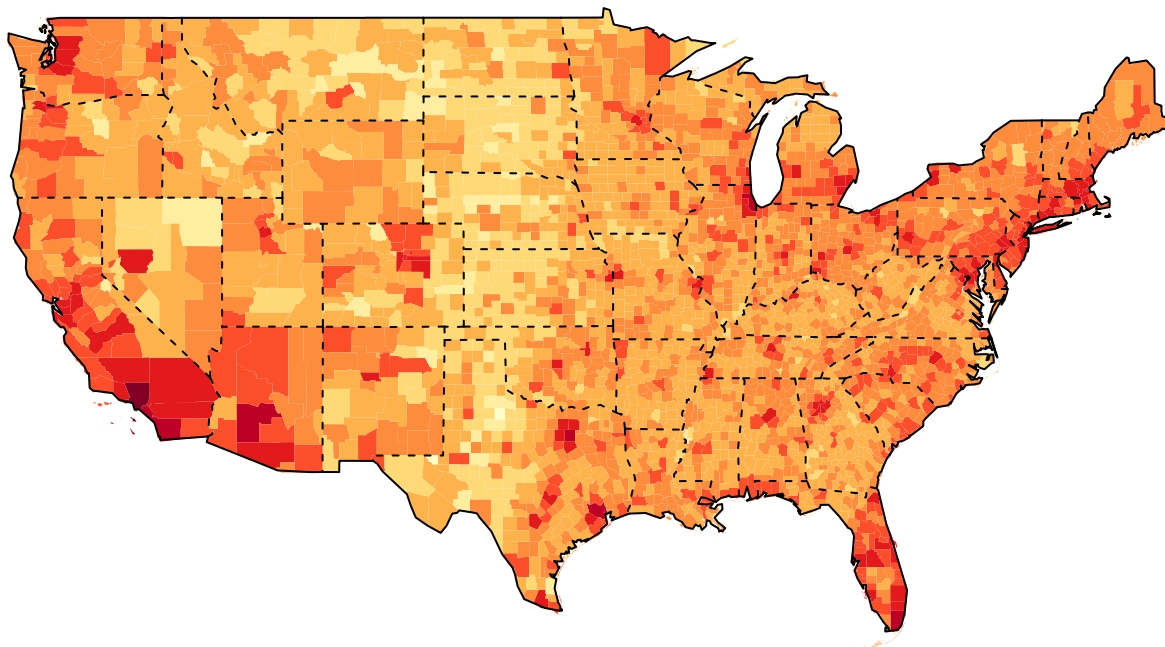

Supplement: Supplementary file 24 [file 1]

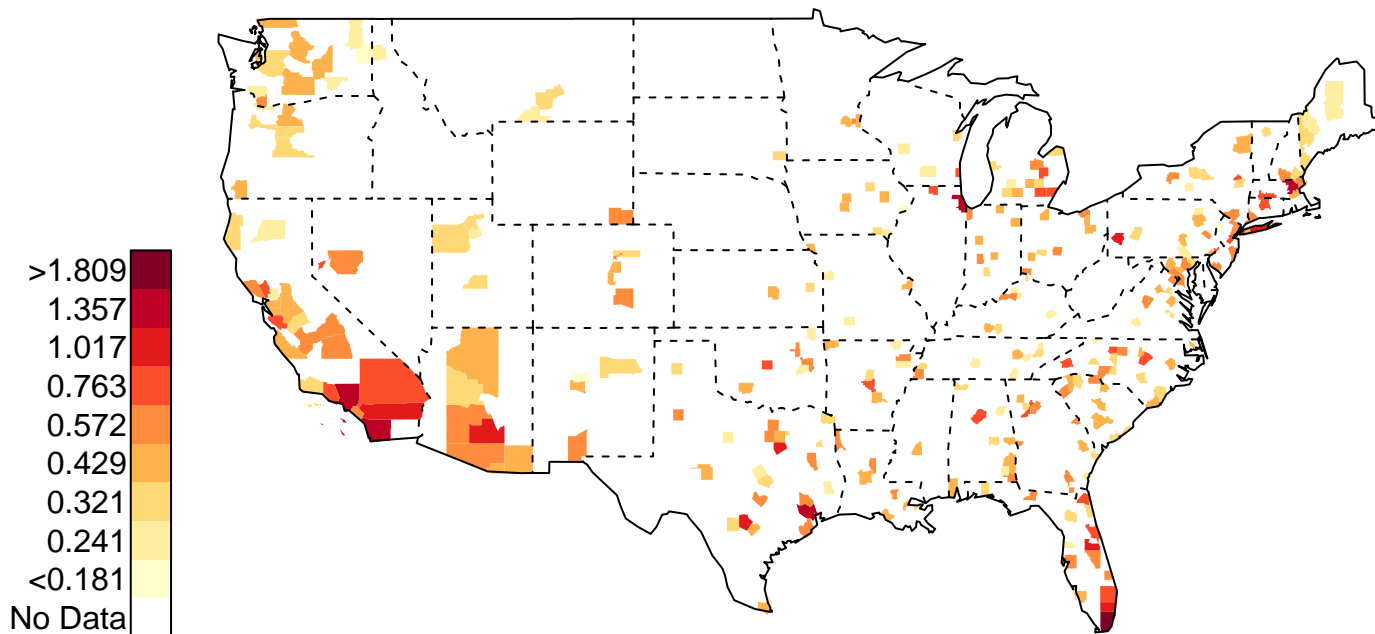

Supplement: Supplementary file 25 [file 1]

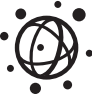

**PLOS**

**SUBMISSION**

Supplement: Supplementary file 26 [file 1]

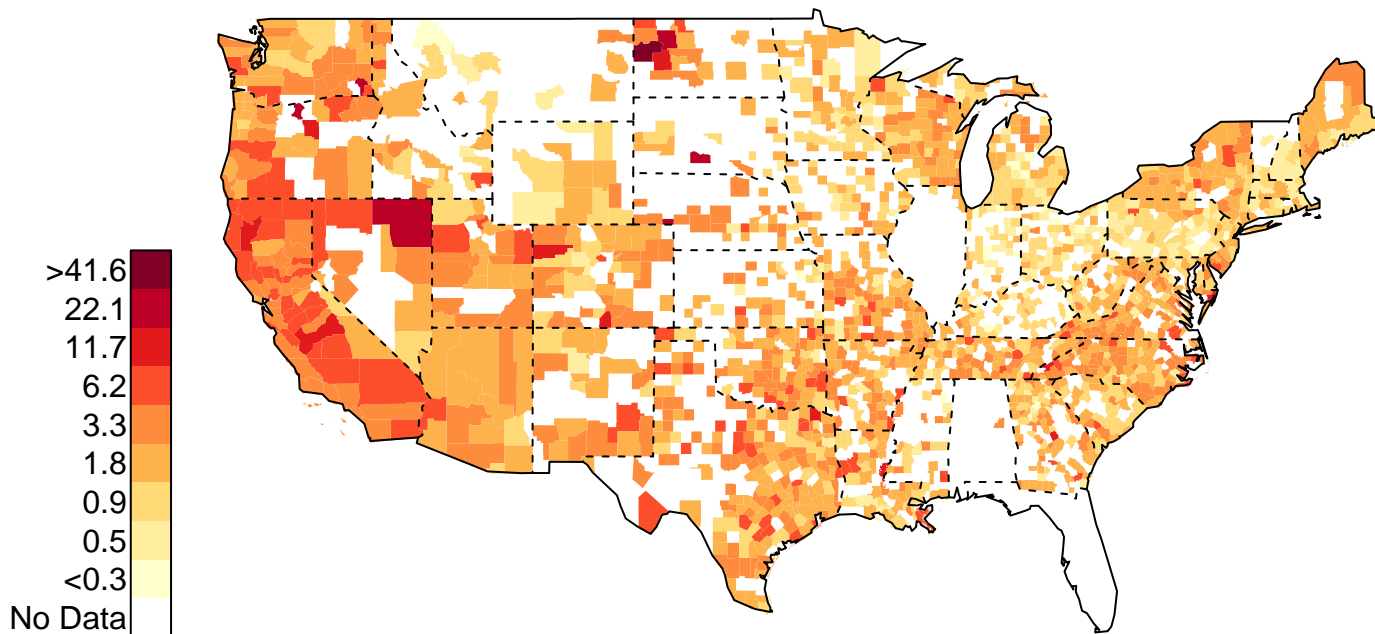

Supplement: Supplementary file 27 [file 1]

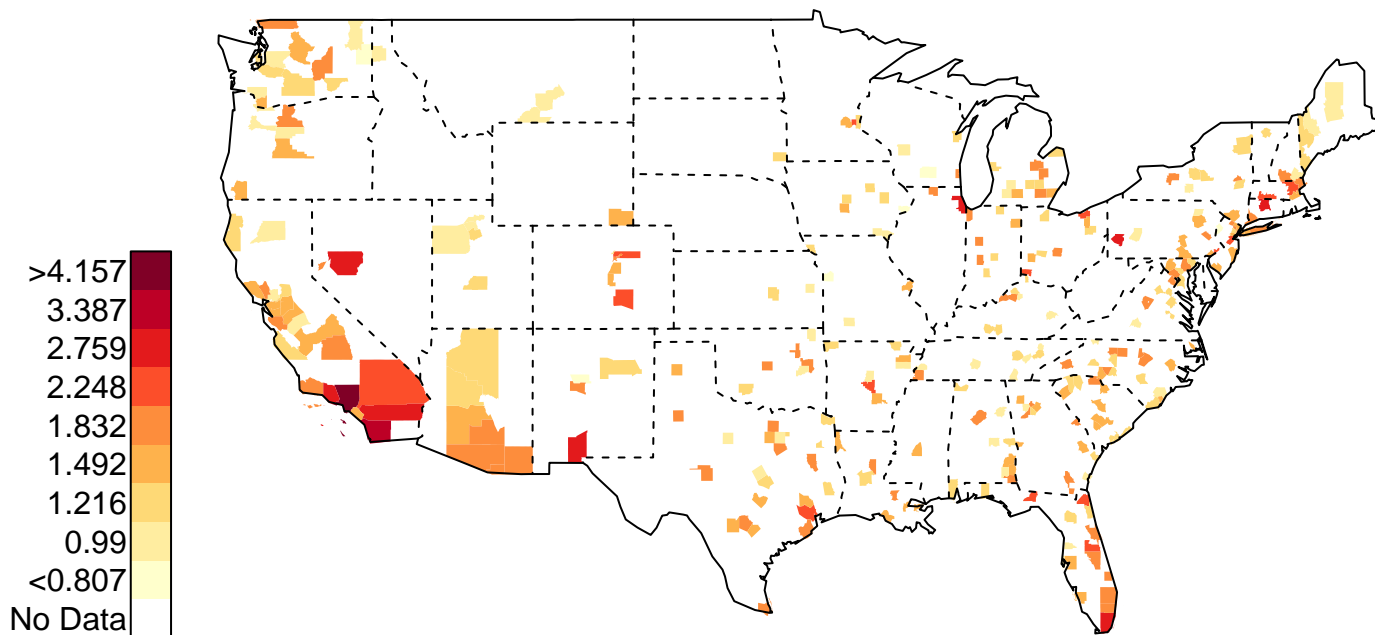

Supplement: Supplementary file 28 [file 1]

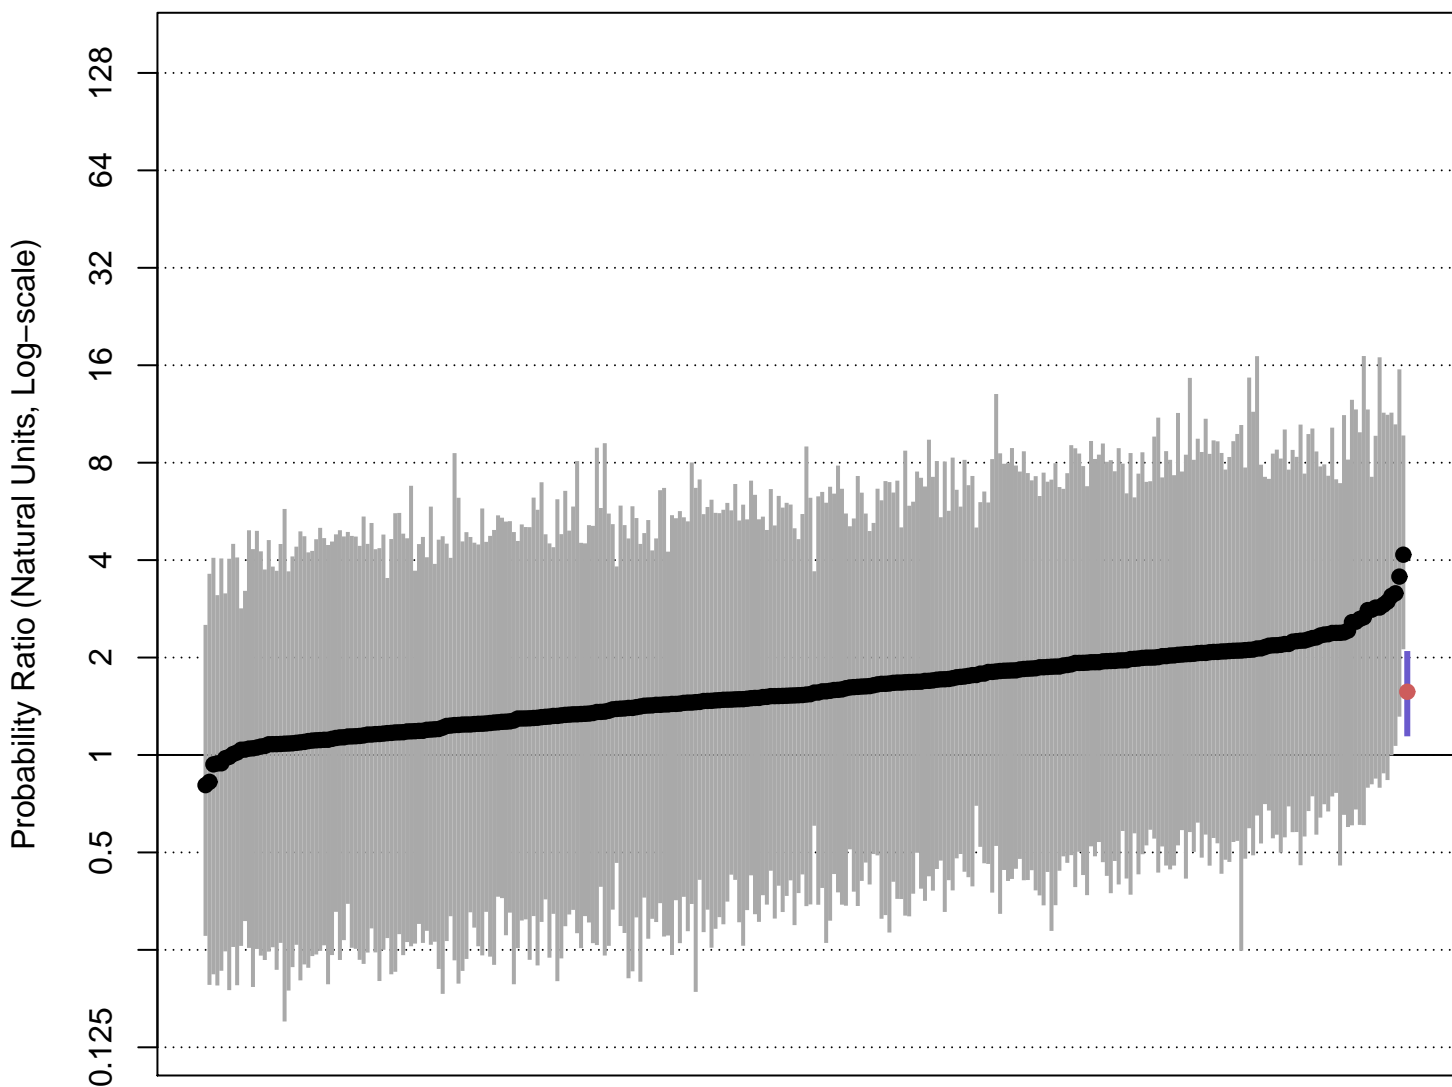

County-Level Ratio of Probabilities of Being Shot By Police: Hispanic-Armed to White-Armed

Supplement: Supplementary file 29 [file 1]

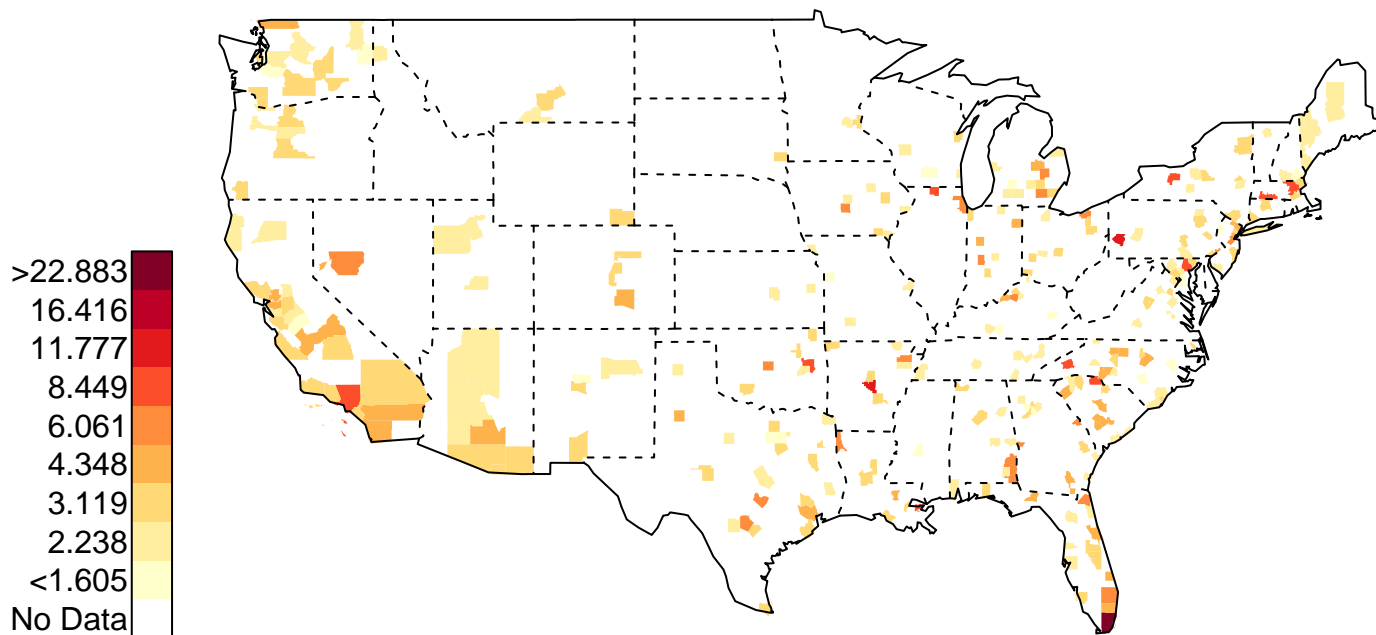

Supplement: Supplementary file 30 [file 1]

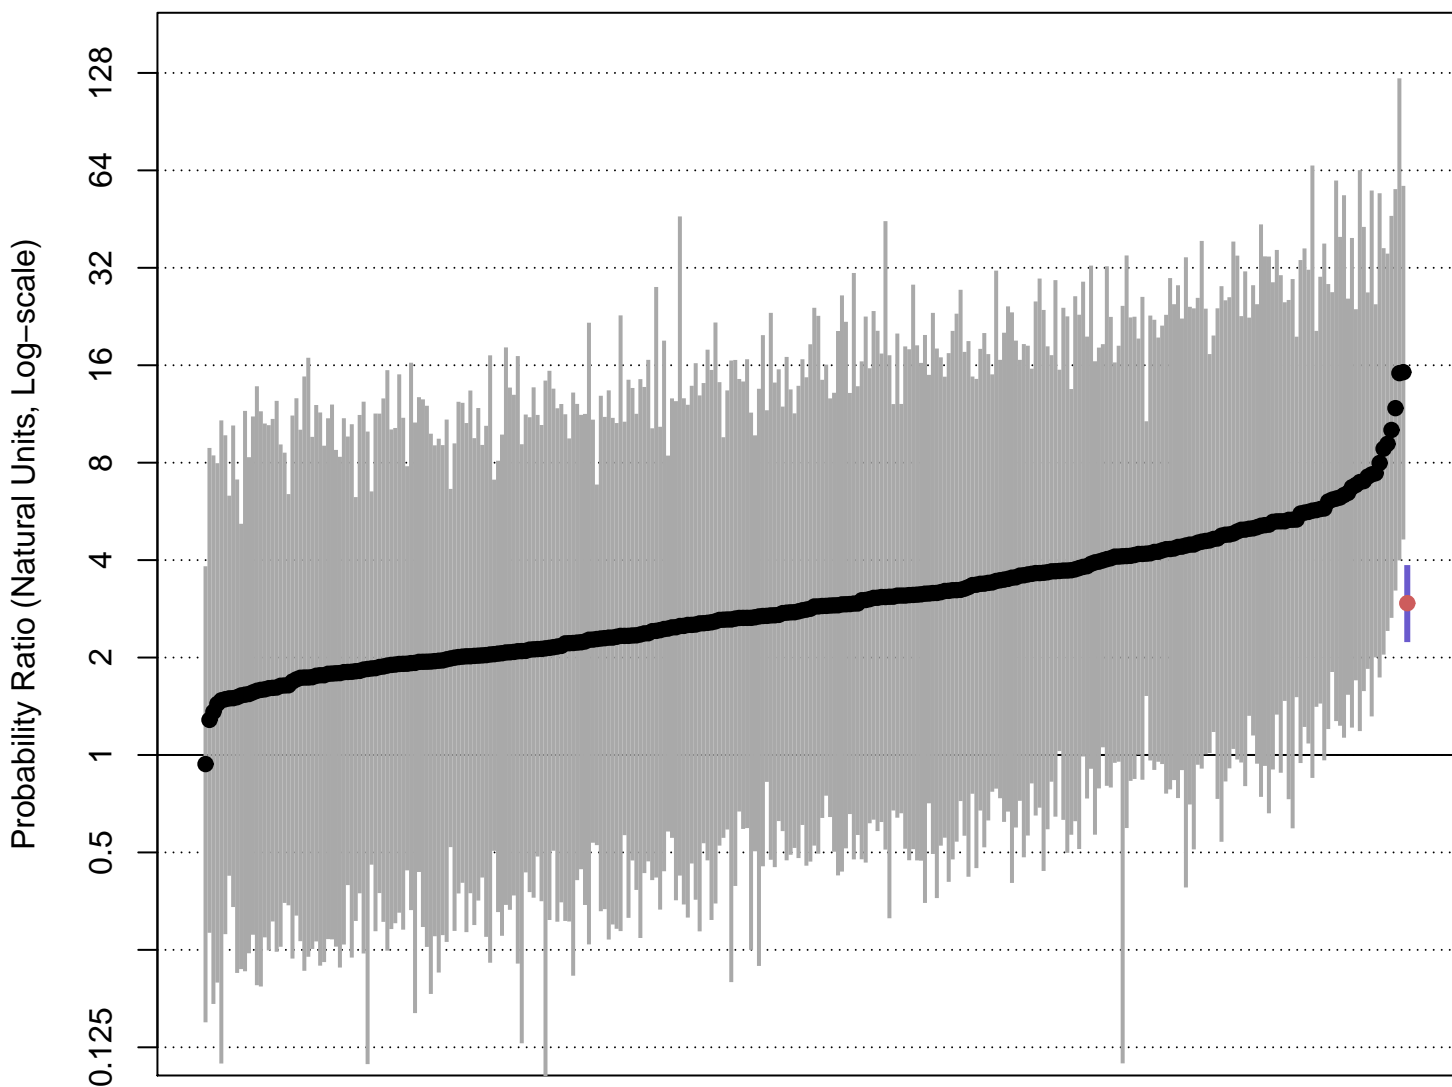

County-Level Ratio of Probabilities of Being Shot By Police: Black-Armed to White-Armed

Supplement: Supplementary file 31 [file 1]
